# Supplementary material for: Constraining the depth of the lithosphere-asthenosphere boundary in tectonically complex regions using locally adjusted lithological forward models and seismic velocities
Source: Copernicus journal article supplement (doi:10.5194/egusphere-2025-3633), 2025-09-23

**Figure S3.**

Stack S-to-P receiver functions at all investigated seismological stations. The y-axis shows the absolute amplitude of the receiver functions and the x-axis represent the time of the calculated receiver functions.

***Permanent stations***

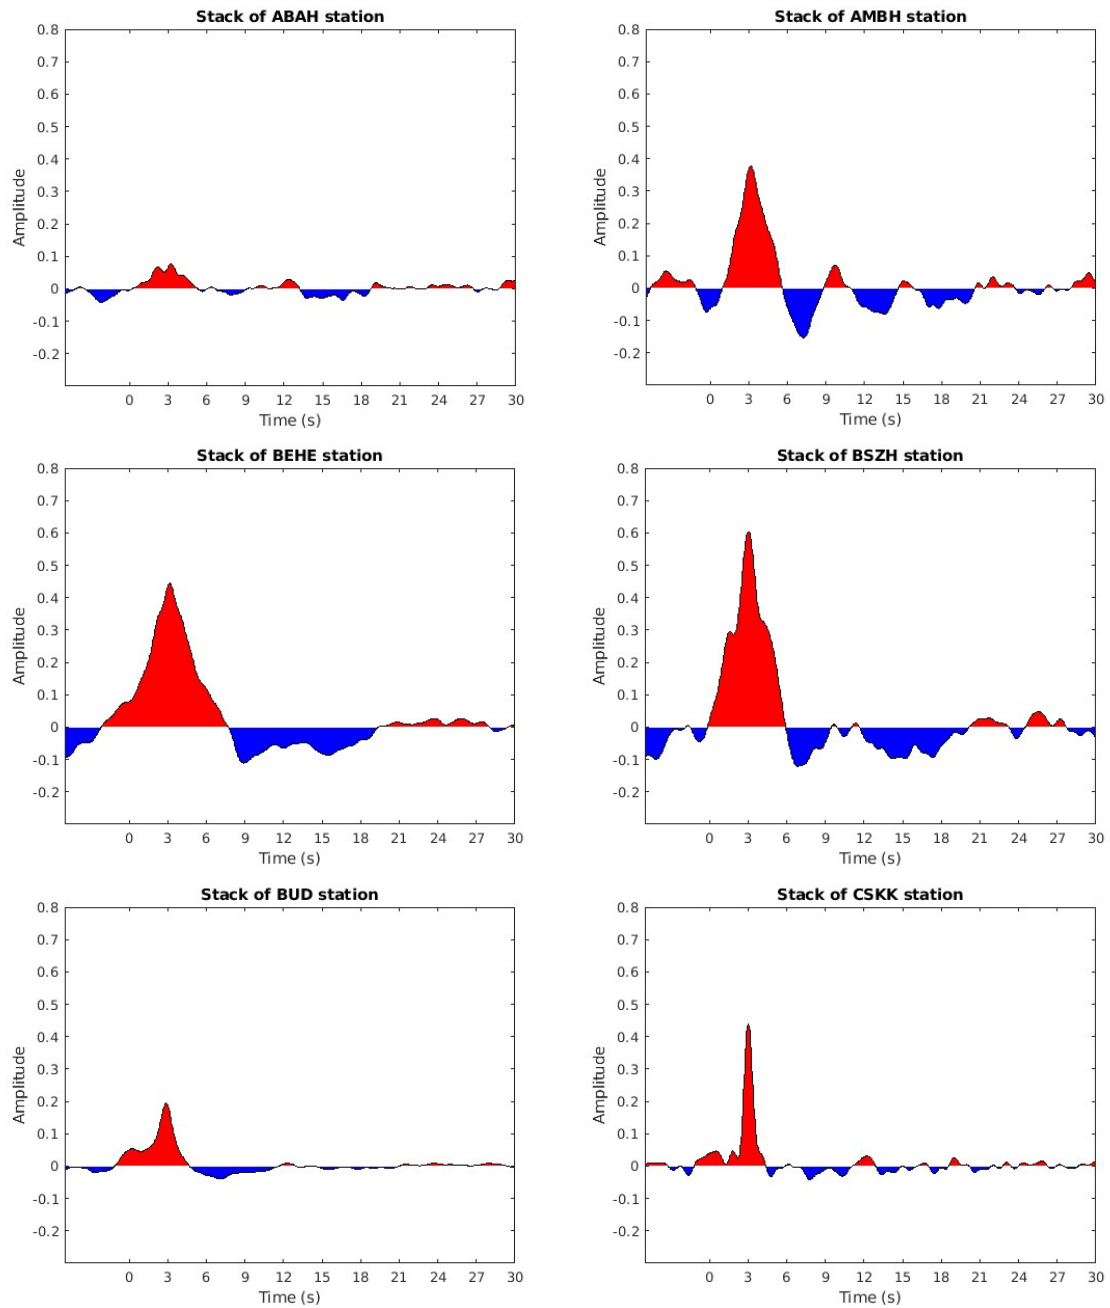

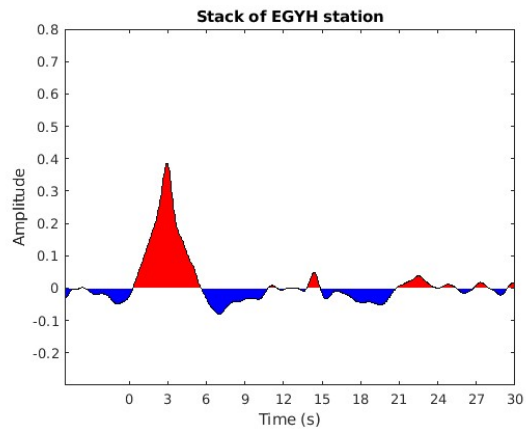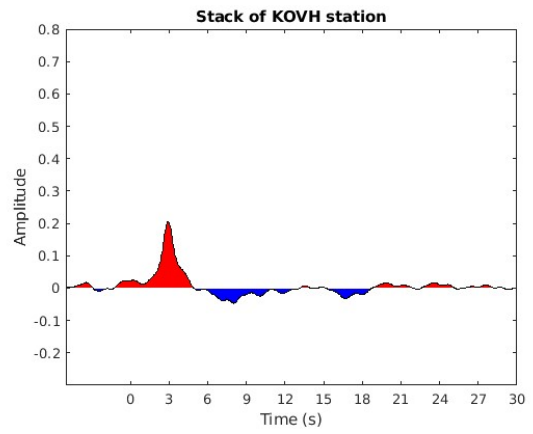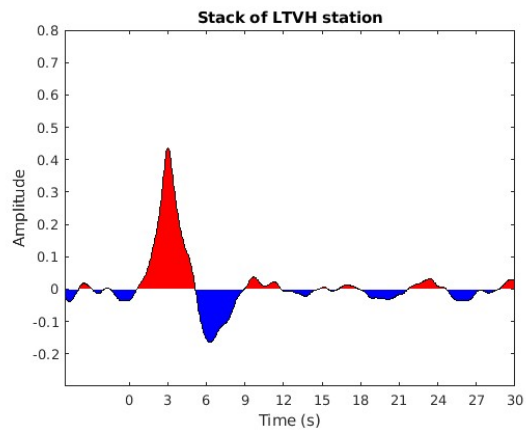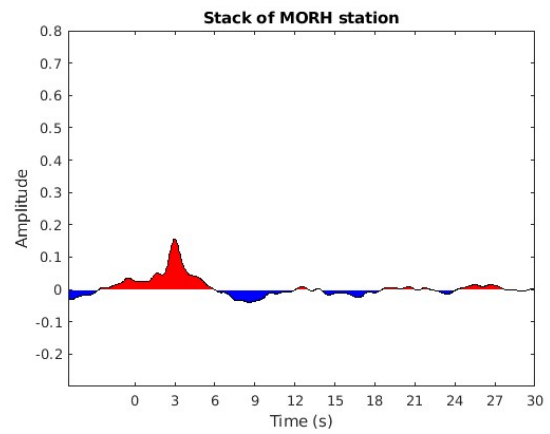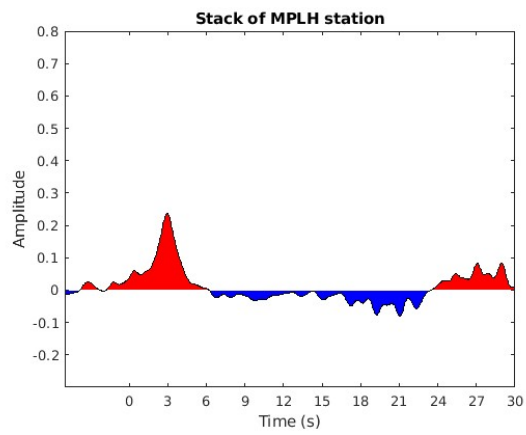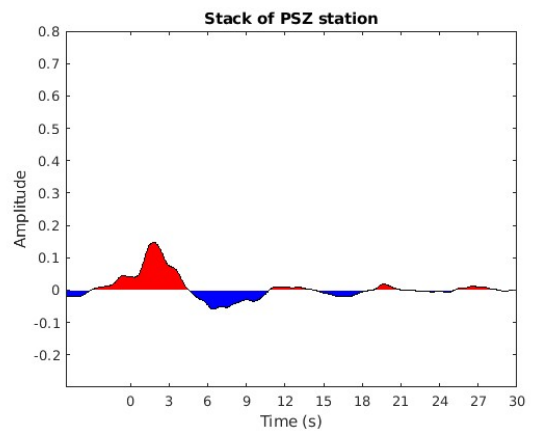

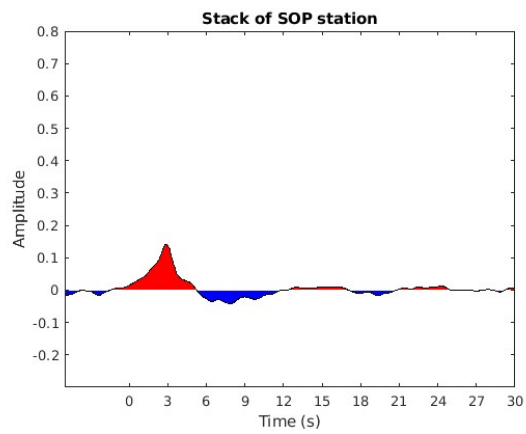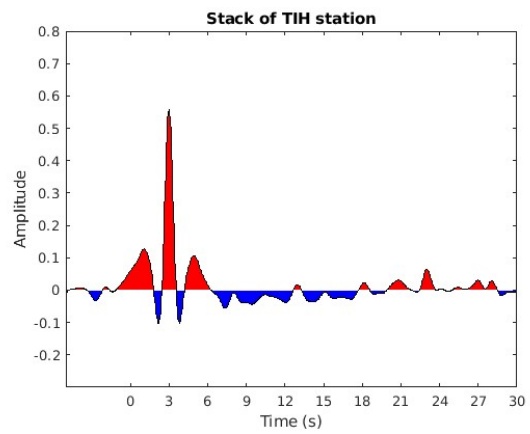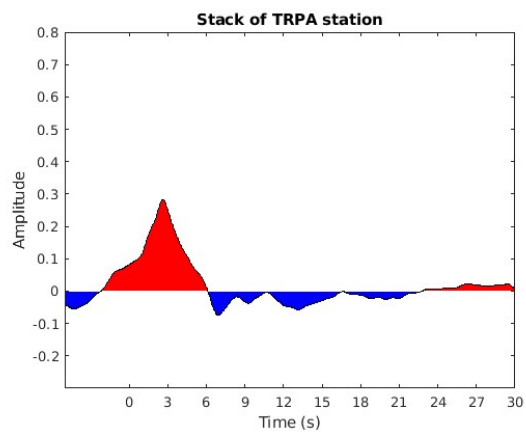

### *Temporary stations*

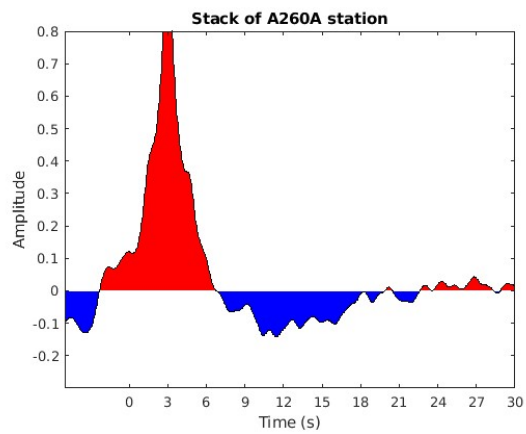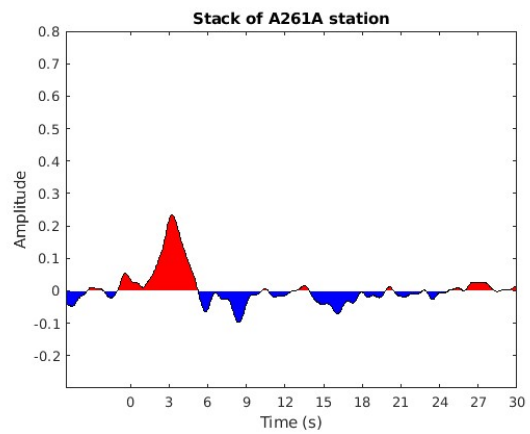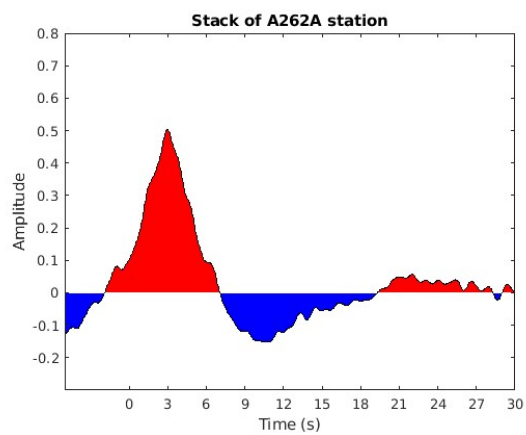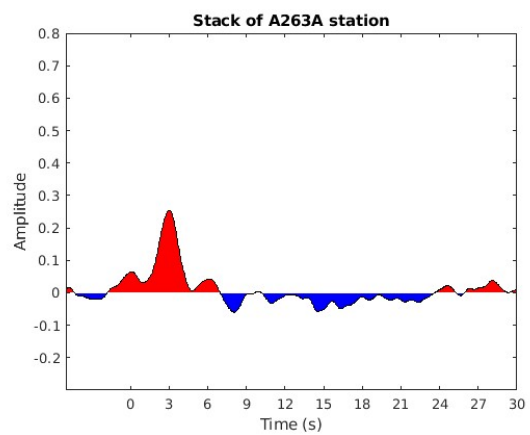

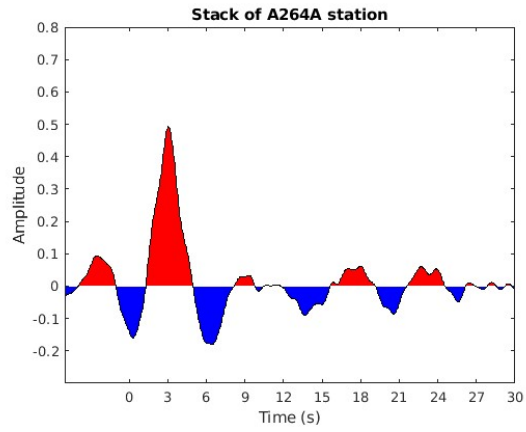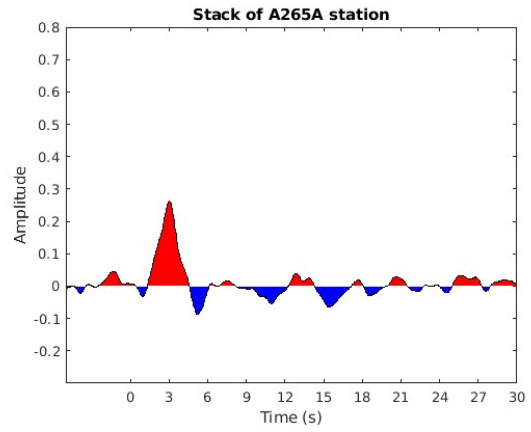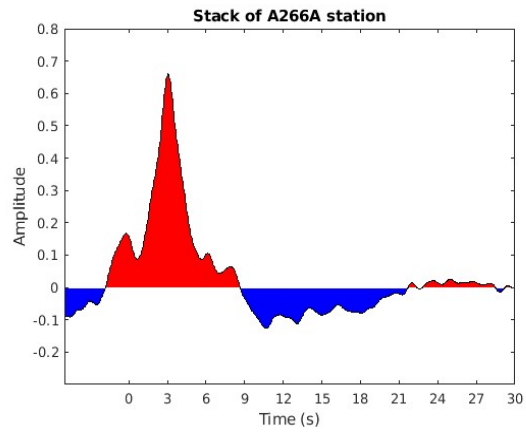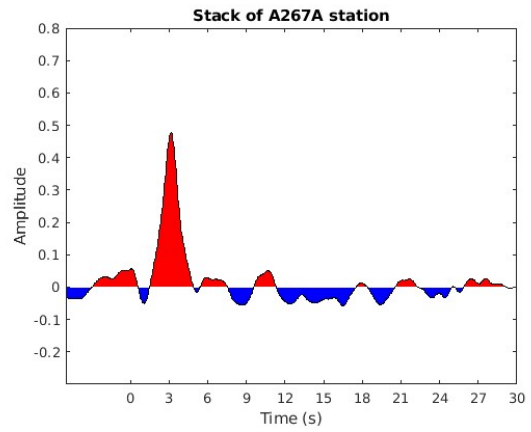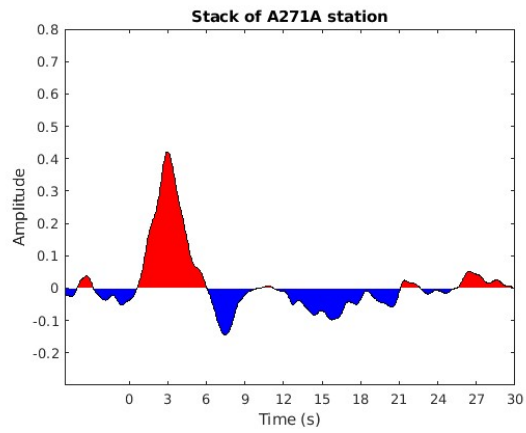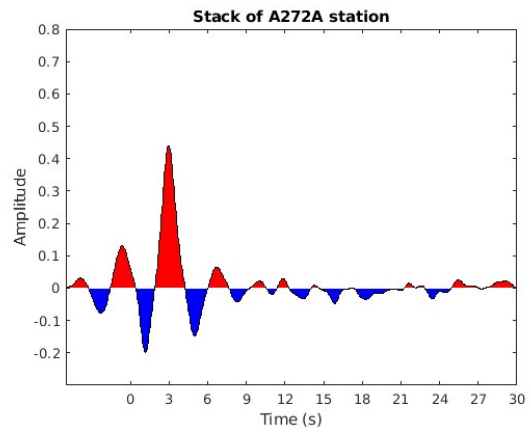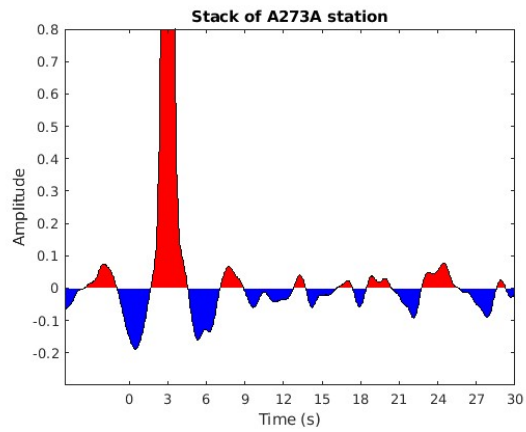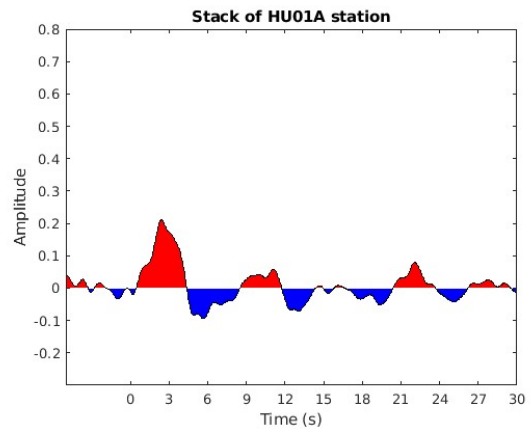

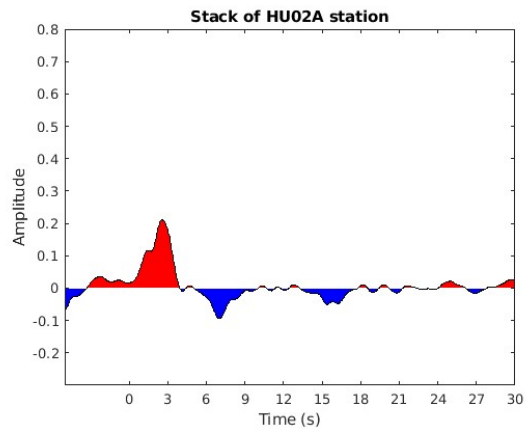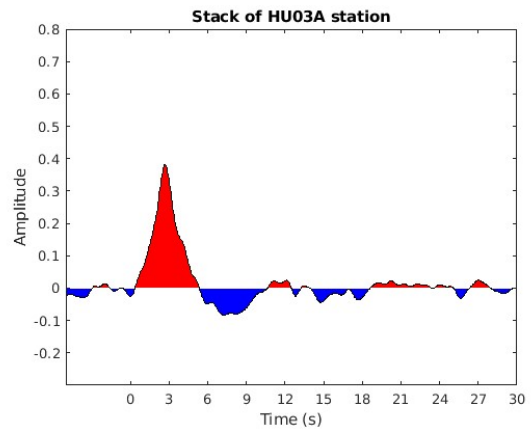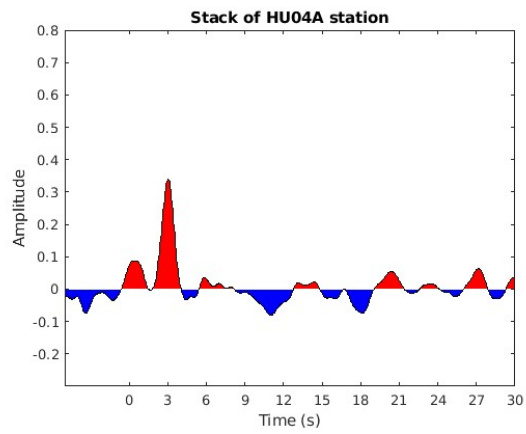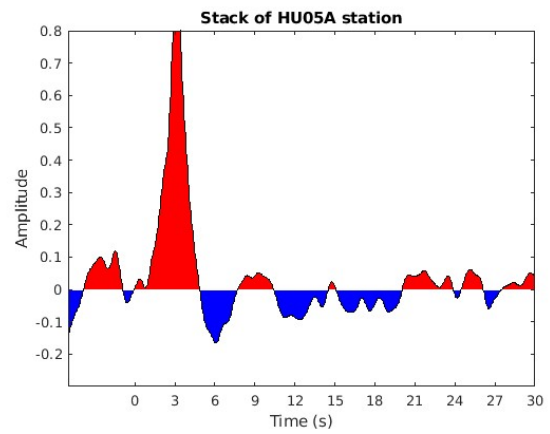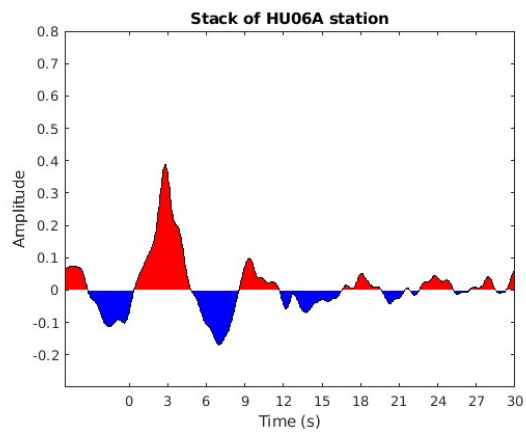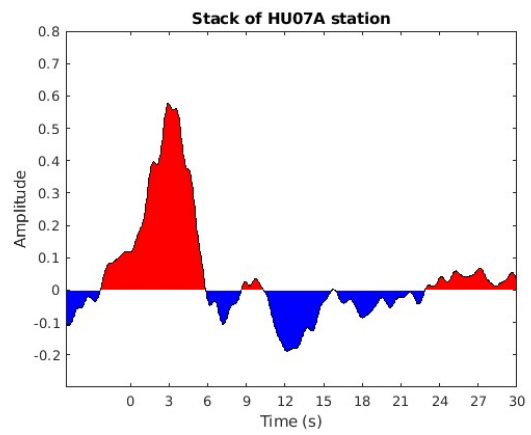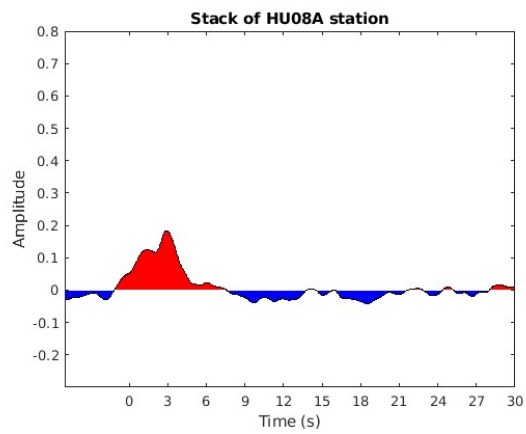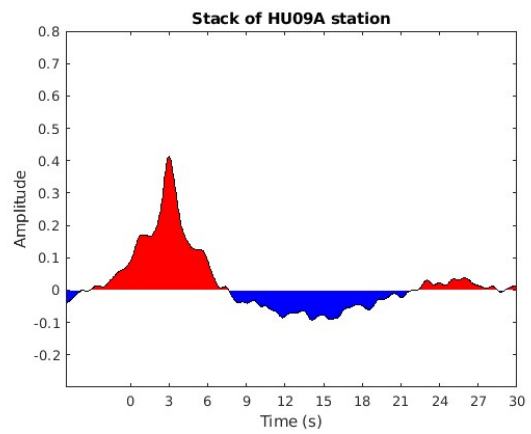

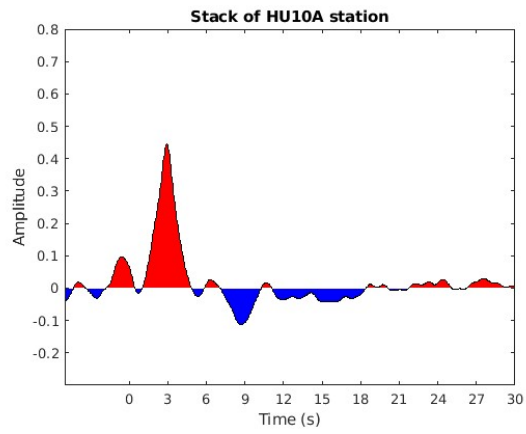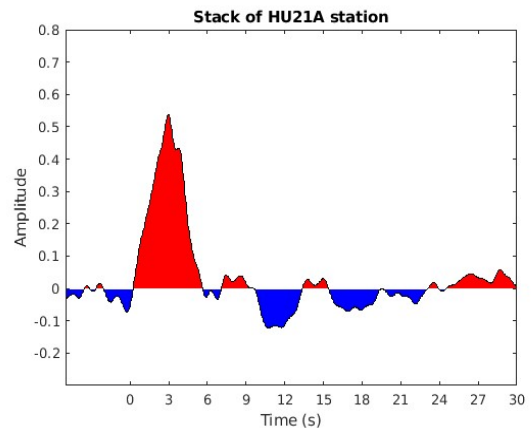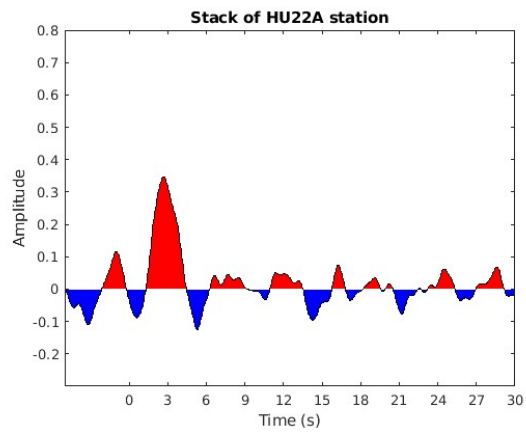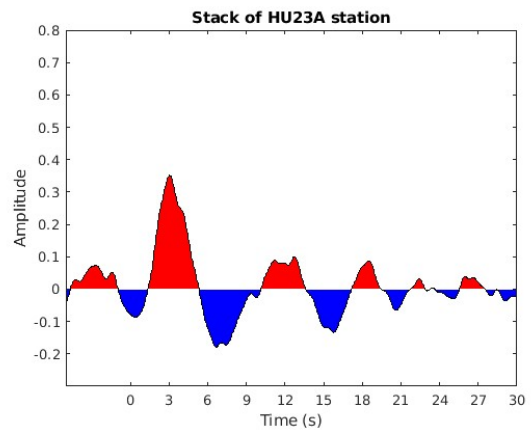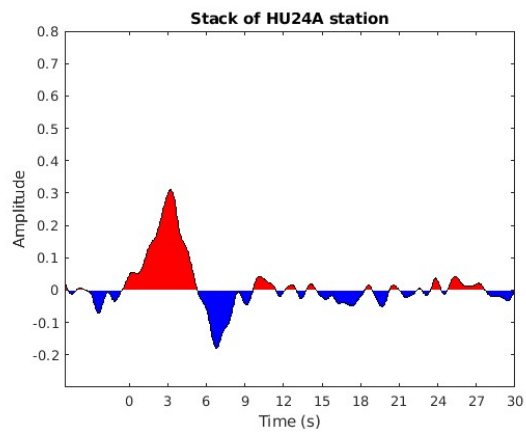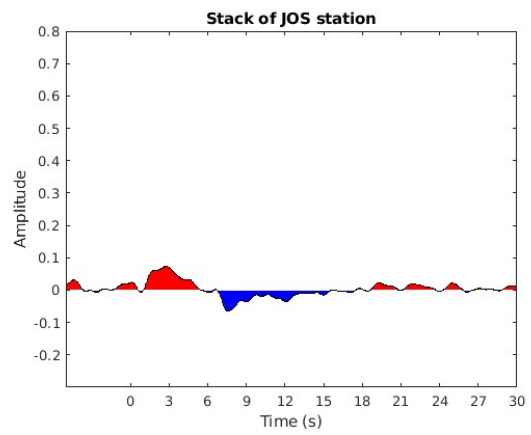

Supplement: Supplementary file 1 [file egusphere-2025-3633-supplement.zip]
