# Supplementary material for: Constraining the depth of the lithosphere-asthenosphere boundary in tectonically complex regions using locally adjusted lithological forward models and seismic velocities
Source: Copernicus journal article supplement (doi:10.5194/egusphere-2025-3633), 2025-09-23
Supplement: Supplementary file 1 [file egusphere-2025-3633-supplement.zip]

## Sheet: Info
Table S2. Parameter tests and forward models of the seismological stations.
Tab 1. Parameter tests (PSZ)	Heat flow: 120, 100, 80, 70, 50 mW/m2; Pargasite increase to 0, 1, 2, 5, 10% in 5km above LAB (no melt); Melt content of 0, 0.5, 1, 1.5, 2, 4% below LAB (no pargasite)
Tab 2. PSZ, EGYH, MORH, LTVH	Forward models for the negative phase depth (Kalmár et al., 2023) ± 5 and 10 km; with melt contents of 0, 0.5, 1, 2, and 4 vol.%
Tab 3. Permanent stations	Forward models for the negative phase depth (Kalmár et al., 2023) ± 5 and 10 km; with melt contents of 0, 0.5, and 1 vol.%
Tab 4. AlpArray and PACASE stations	Forward models for the negative phase depth (Kalmár et al., 2023); with melt content of 1 vol.%

## Sheet: Tab 1. Parameter tests
PSZ
		Heat flow (dry column without pargasite or melt)																Pargasite increase in a span of 5 km above the LAB; heat flow: 100mW/m2, no melt																Melt content below the LAB; heat flow: 100mW/m2, no pargasite
		120 mW/m2			100 mW/m2			80 mW/m2			70 mW/m2			50 mW/m2				constant 0.5%			increase to 1%			increase to 2%			increase to 5%			increase to 10%				0			0.005			0.01			0.015			0.02			0.04
Depth		Vp	Vs		Vp	Vs		Vp	Vs		Vp	Vs		Vp	Vs			Vp	Vs		Vp	Vs		Vp	Vs		Vp	Vs		Vp	Vs			Vp	Vs		Vp	Vs		Vp	Vs		Vp	Vs		Vp	Vs		Vp
2		5.99085	3.60245		5.99353	3.6048		5.99573	3.60671		5.99702	3.60785		5.99915	3.60971			5.99353	3.6048		5.99353	3.6048		5.99353	3.6048		5.99353	3.6048		5.99353	3.6048			5.99353	3.6048		5.99353	3.6048		5.99353	3.6048		5.99353	3.6048		5.99353	3.6048		5.99353
6		6.00943	3.59474		6.02007	3.60417		6.02851	3.61167		6.03212	3.61487		6.03866	3.62069			6.02007	3.60417		6.02007	3.60417		6.02007	3.60417		6.02007	3.60417		6.02007	3.60417			6.02007	3.60417		6.02007	3.60417		6.02007	3.60417		6.02007	3.60417		6.02007	3.60417		6.02007
10		6.06564	3.59858		6.08471	3.61565		6.10042	3.62974		6.10661	3.63529		6.11923	3.64663			6.08471	3.61565		6.08471	3.61565		6.08471	3.61565		6.08471	3.61565		6.08471	3.61565			6.08471	3.61565		6.08471	3.61565		6.08471	3.61565		6.08471	3.61565		6.08471	3.61565		6.08471
16		6.28196	3.63892		6.31259	3.66543		6.33922	3.68854		6.34969	3.69763		6.37331	3.71821			6.31259	3.66543		6.31259	3.66543		6.31259	3.66543		6.31259	3.66543		6.31259	3.66543			6.31259	3.66543		6.31259	3.66543		6.31259	3.66543		6.31259	3.66543		6.31259	3.66543		6.31259
22		6.64272	3.71884		6.68626	3.75324		6.72663	3.78527		6.74211	3.79759		6.78247	3.82983			6.68626	3.75324		6.68626	3.75324		6.68626	3.75324		6.68626	3.75324		6.68626	3.75324			6.68626	3.75324		6.68626	3.75324		6.68626	3.75324		6.68626	3.75324		6.68626	3.75324		6.68626
28		7.14469	3.95371		7.19902	3.99338		7.25222	4.03243		7.27338	4.04803		7.33325	4.0924			7.19902	3.99338		7.19902	3.99338		7.19902	3.99338		7.19902	3.99338		7.19902	3.99338			7.19902	3.99338		7.19902	3.99338		7.19902	3.99338		7.19902	3.99338		7.19902	3.99338		7.19902
33		7.50309	4.18535		7.55993	4.2256		7.61923	4.2678		7.64323	4.28495		7.71662	4.33768			7.55993	4.2256		7.55993	4.2256		7.55993	4.2256		7.55993	4.2256		7.55993	4.2256			7.55993	4.2256		7.55993	4.2256		7.55993	4.2256		7.55993	4.2256		7.55993	4.2256		7.55993
34		7.82354	4.47125		7.89721	4.51974		7.97546	4.57145		8.00663	4.59213		8.1051	4.65779			7.89721	4.51974		7.89721	4.51974		7.89721	4.51974		7.89721	4.51974		7.89721	4.51974			7.89721	4.51974		7.89721	4.51974		7.89721	4.51974		7.89721	4.51974		7.89721	4.51974		7.89721
35		7.81683	4.46551		7.89061	4.51405		7.96965	4.56628		8.00154	4.58742		8.10216	4.65449			7.89061	4.51405		7.89061	4.51405		7.89061	4.51405		7.89061	4.51405		7.89061	4.51405			7.89061	4.51405		7.89061	4.51405		7.89061	4.51405		7.89061	4.51405		7.89061	4.51405		7.89061
36		7.81012	4.45977		7.88398	4.50835		7.96318	4.56066		7.99579	4.58228		8.09981	4.65159			7.88398	4.50835		7.88398	4.50835		7.88398	4.50835		7.88398	4.50835		7.88398	4.50835			7.88398	4.50835		7.88398	4.50835		7.88398	4.50835		7.88398	4.50835		7.88398	4.50835		7.88398
37		7.80405	4.45446		7.87734	4.50265		7.95797	4.55589		7.99065	4.57755		8.09743	4.64867			7.87734	4.50265		7.87734	4.50265		7.87734	4.50265		7.87734	4.50265		7.87734	4.50265			7.87734	4.50265		7.87734	4.50265		7.87734	4.50265		7.87734	4.50265		7.87734	4.50265		7.87734
38		7.79865	4.44958		7.87133	4.49737		7.95209	4.55068		7.98548	4.5728		8.09504	4.64575			7.87133	4.49737		7.87133	4.49737		7.87133	4.49737		7.87133	4.49737		7.87133	4.49737			7.87133	4.49737		7.87133	4.49737		7.87133	4.49737		7.87133	4.49737		7.87133	4.49737		7.87133
39		7.79257	4.44427		7.86532	4.49209		7.94685	4.54589		7.9803	4.56805		8.09263	4.64281			7.86532	4.49209		7.86532	4.49209		7.86532	4.49209		7.86532	4.49209		7.86532	4.49209			7.86532	4.49209		7.86532	4.49209		7.86532	4.49209		7.86532	4.49209		7.86532	4.49209		7.86532
40		7.78781	4.43982		7.85929	4.4868		7.94094	4.54066		7.9751	4.56328		8.09019	4.63987			7.85929	4.4868		7.85929	4.4868		7.85929	4.4868		7.85929	4.4868		7.85929	4.4868			7.85929	4.4868		7.85929	4.4868		7.85929	4.4868		7.85929	4.4868		7.85929	4.4868		7.85929
41		7.78238	4.43494		7.85391	4.48194		7.93566	4.53586		7.97052	4.55893		8.08774	4.63692			7.85391	4.48194		7.85391	4.48194		7.85391	4.48194		7.85391	4.48194		7.85391	4.48194			7.85391	4.48194		7.85391	4.48194		7.85391	4.48194		7.85391	4.48194		7.85391	4.48194		7.85391
42		7.77828	4.43093		7.84852	4.47707		7.93036	4.53104		7.96528	4.55415		8.08528	4.63395			7.84852	4.47707		7.84852	4.47707		7.84852	4.47707		7.84852	4.47707		7.84852	4.47707			7.84852	4.47707		7.84852	4.47707		7.84852	4.47707		7.84852	4.47707		7.84852	4.47707		7.84852
43		7.77351	4.42647		7.84313	4.4722		7.9257	4.52665		7.96067	4.54978		8.08341	4.6314			7.84313	4.4722		7.84313	4.4722		7.84313	4.4722		7.84313	4.4722		7.84313	4.4722			7.84313	4.4722		7.84313	4.4722		7.84313	4.4722		7.84313	4.4722		7.84313	4.4722		7.84313
44		7.76939	4.42246		7.83772	4.46733		7.92037	4.52182		7.95604	4.54541		8.08091	4.62842			7.83772	4.46733		7.83772	4.46733		7.83772	4.46733		7.83772	4.46733		7.83772	4.46733			7.83772	4.46733		7.83772	4.46733		7.83772	4.46733		7.83772	4.46733		7.83772	4.46733		7.83772
45		7.76594	4.41888		7.83296	4.46289		7.91569	4.51742		7.9514	4.54103		8.07839	4.62543			7.83296	4.46289		7.83296	4.46289		7.83296	4.46289		7.83296	4.46289		7.83296	4.46289			7.83296	4.46289		7.83296	4.46289		7.83296	4.46289		7.83296	4.46289		7.83296	4.46289		7.83296
46		7.76249	4.4153		7.8282	4.45845		7.91099	4.51301		7.94675	4.53665		8.07648	4.62285			7.8282	4.45845		7.8282	4.45845		7.8282	4.45845		7.8282	4.45845		7.8282	4.45845			7.8282	4.45845		7.8282	4.45845		7.8282	4.45845		7.8282	4.45845		7.8282	4.45845		7.8282
47		7.75903	4.41172		7.82409	4.45444		7.90628	4.5086		7.94208	4.53225		8.07393	4.61985			7.82409	4.45444		7.82409	4.45444		7.82409	4.45444		7.82409	4.45444		7.82409	4.45444			7.82409	4.45444		7.82409	4.45444		7.82409	4.45444		7.82409	4.45444		7.82409	4.45444		7.82409
48		7.75624	4.40858		7.81998	4.45043		7.90222	4.50461		7.93805	4.52829		8.07137	4.61684			7.81998	4.45043		7.81998	4.45043		7.81998	4.45043		7.81998	4.45043		7.81998	4.45043			7.81998	4.45043		7.81998	4.45043		7.81998	4.45043		7.81998	4.45043		7.81998	4.45043		7.81998
49		7.75344	4.40544		7.81586	4.44642		7.89749	4.50019		7.93401	4.52432		8.06942	4.61424			7.81586	4.44642		7.81586	4.44642		7.81586	4.44642		7.81586	4.44642		7.81586	4.44642			7.81586	4.44642		7.81586	4.44642		7.81586	4.44642		7.81586	4.44642		7.81586	4.44642		7.81586
50		7.75063	4.40229		7.81174	4.44241		7.89341	4.4962		7.92931	4.51991		8.06683	4.61122			7.81174	4.44241		7.81174	4.44241		7.81174	4.44241		7.81174	4.44241		7.81174	4.44241			7.81174	4.44241		7.81174	4.44241		7.81174	4.44241		7.81174	4.44241		7.81174	4.44241		7.81174
51		7.74849	4.39959		7.80827	4.43883		7.88932	4.4922		7.92524	4.51593		8.06486	4.60861			7.80827	4.43883		7.80827	4.43883		7.80827	4.43883		7.80827	4.43883		7.80827	4.43883			7.80827	4.43883		7.80827	4.43883		7.80827	4.43883		7.80827	4.43883		7.80827	4.43883		7.80827
52		7.74635	4.39688		7.8048	4.43525		7.88522	4.4882		7.92182	4.51237		8.06224	4.60557			7.8048	4.43525		7.8048	4.43525		7.8048	4.43525		7.8048	4.43525		7.8048	4.43525			7.8048	4.43525		7.8048	4.43525		7.8048	4.43525		7.8048	4.43525		7.8048	4.43525		7.8048
53		7.74487	4.39461		7.80133	4.43166		7.88177	4.48463		7.91774	4.50839		8.06024	4.60295			7.80133	4.43166		7.80133	4.43166		7.80133	4.43166		7.80133	4.43166		7.80133	4.43166			7.80133	4.43166		7.80133	4.43166		7.80133	4.43166		7.80133	4.43166		7.80133	4.43166		7.80133
54		7.74339	4.39234		7.79785	4.42808		7.87766	4.48063		7.91366	4.5044		8.0576	4.5999			7.79785	4.42808		7.79785	4.42808		7.79785	4.42808		7.79785	4.42808		7.79785	4.42808			7.79785	4.42808		7.79785	4.42808		7.79785	4.42808		7.79785	4.42808		7.79785	4.42808		7.79785
55		7.7419	4.39006		7.79502	4.42494		7.8742	4.47706		7.91021	4.50083		8.05558	4.59727			7.79502	4.42494		7.79502	4.42494		7.79502	4.42494		7.79502	4.42494		7.79502	4.42494			7.79502	4.42494		7.79502	4.42494		7.79502	4.42494		7.79502	4.42494		7.79502	4.42494		7.79502
56		7.73908	4.38694		7.79084	4.42091		7.86932	4.47257		7.90533	4.49634		8.05201	4.59365			7.7922	4.42179		7.79157	4.42138		7.79084	4.42091		7.78971	4.42018		7.7887	4.41954			7.7922	4.42179		7.7922	4.42179		7.7922	4.42179		7.7922	4.42179		7.7922	4.42179		7.7922
57		7.7365	4.38397		7.78688	4.41704		7.86398	4.4678		7.89998	4.49156		8.04732	4.58929			7.79003	4.41908		7.78867	4.4182		7.78688	4.41704		7.7836	4.41493		7.78018	4.41273			7.79003	4.41908		7.79003	4.41908		7.79003	4.41908		7.79003	4.41908		7.79003	4.41908		7.79003
58		7.73335	4.38065		7.78169	4.41238		7.85806	4.46265		7.89403	4.48639		8.04261	4.58493			7.7872	4.41593		7.78501	4.41452		7.78169	4.41238		7.77453	4.40777		7.76582	4.40216			7.7872	4.41593		7.7872	4.41593		7.7872	4.41593		7.7872	4.41593		7.7872	4.41593		7.7872
59		7.73013	4.37729		7.7764	4.40766		7.85201	4.45743		7.88729	4.48072		8.03642	4.57962			7.78503	4.41322		7.78188	4.41119		7.7764	4.40766		7.76251	4.39872		7.74275	4.38599			7.78503	4.41322		7.78503	4.41322		7.78503	4.41322		7.78503	4.41322		7.78503	4.41322		7.78503
60		7.72594	4.3733		7.77013	4.40232		7.84429	4.45113		7.87951	4.47438		8.02975	4.574			7.78285	4.4105		7.77861	4.40777		7.77013	4.40232		7.74477	4.38599		7.70276	4.35891			7.78285	4.4105		7.78285	4.4105		7.78285	4.4105		7.78285	4.4105		7.78285	4.4105		7.78285
61		7.74243	4.38267		7.78564	4.41103		7.85907	4.45935		7.89458	4.48278		8.04615	4.58326			7.78564	4.41103		7.78564	4.41103		7.78564	4.41103		7.78564	4.41103		7.78564	4.41103			7.78564	4.41103		7.52484	4.14903		7.29904	3.91953		7.10824	3.72253		6.95244	3.55803		6.67924
62		7.74225	4.38126		7.78345	4.40831		7.85622	4.4562		7.89174	4.47963		8.04405	4.58059			7.78345	4.40831		7.78345	4.40831		7.78345	4.40831		7.78345	4.40831		7.78345	4.40831			7.78345	4.40831		7.52265	4.14631		7.29685	3.91681		7.10605	3.71981		6.95025	3.55531		6.67705
63		7.74273	4.3803		7.78192	4.40603		7.85402	4.45348		7.88824	4.47605		8.04131	4.57749			7.78192	4.40603		7.78192	4.40603		7.78192	4.40603		7.78192	4.40603		7.78192	4.40603			7.78192	4.40603		7.52112	4.14403		7.29532	3.91453		7.10452	3.71753		6.94872	3.55303		6.67552
64		7.7432	4.37933		7.78039	4.40375		7.85117	4.45032		7.88539	4.47289		8.03919	4.57481			7.78039	4.40375		7.78039	4.40375		7.78039	4.40375		7.78039	4.40375		7.78039	4.40375			7.78039	4.40375		7.51959	4.14175		7.29379	3.91225		7.10299	3.71525		6.94719	3.55075		6.67399
65		7.74367	4.37836		7.77952	4.4019		7.84897	4.4476		7.88319	4.47017		8.03643	4.57171			7.77952	4.4019		7.77952	4.4019		7.77952	4.4019		7.77952	4.4019		7.77952	4.4019			7.77952	4.4019		7.51872	4.1399		7.29292	3.9104		7.10212	3.7134		6.94632	3.5489		6.67312
66		7.7448	4.37783		7.77798	4.39962		7.8461	4.44444		7.88033	4.46702		8.03429	4.56903			7.77798	4.39962		7.77798	4.39962		7.77798	4.39962		7.77798	4.39962		7.77798	4.39962			7.77798	4.39962		7.51718	4.13762		7.29138	3.90812		7.10058	3.71112		6.94478	3.54662		6.67158
67		7.74592	4.3773		7.77711	4.39777		7.84389	4.44172		7.87747	4.46386		8.03151	4.56591			7.77711	4.39777		7.77711	4.39777		7.77711	4.39777		7.77711	4.39777		7.77711	4.39777			7.77711	4.39777		7.51631	4.13577		7.29051	3.90627		7.09971	3.70927		6.94391	3.54477		6.67071
68		7.74704	4.37676		7.77622	4.39593		7.84168	4.439		7.87526	4.46114		8.02936	4.56322			7.77622	4.39593		7.77622	4.39593		7.77622	4.39593		7.77622	4.39593		7.77622	4.39593			7.77622	4.39593		7.51542	4.13393		7.28962	3.90443		7.09882	3.70743		6.94302	3.54293		6.66982
69		7.74816	4.37623		7.776	4.39451		7.84012	4.43671		7.87304	4.45842		8.02656	4.5601			7.776	4.39451		7.776	4.39451		7.776	4.39451		7.776	4.39451		7.776	4.39451			7.776	4.39451		7.5152	4.13251		7.2894	3.90301		7.0986	3.70601		6.9428	3.54151		6.6696
70		7.74927	4.37569		7.77511	4.39267		7.8379	4.43398		7.87082	4.45569		8.02375	4.55698			7.77511	4.39267		7.77511	4.39267		7.77511	4.39267		7.77511	4.39267		7.77511	4.39267			7.77511	4.39267		7.51431	4.13067		7.28851	3.90117		7.09771	3.70417		6.94191	3.53967		6.66871
71		7.75104	4.37559		7.77489	4.39125		7.83634	4.43169		7.8686	4.45297		8.02158	4.55428			7.77489	4.39125		7.77489	4.39125		7.77489	4.39125		7.77489	4.39125		7.77489	4.39125			7.77489	4.39125		7.51409	4.12925		7.28829	3.89975		7.09749	3.70275		6.94169	3.53825		6.66849
72		7.7528	4.37549		7.77465	4.38984		7.83477	4.4294		7.86637	4.45024		8.01876	4.55115			7.77465	4.38984		7.77465	4.38984		7.77465	4.38984		7.77465	4.38984		7.77465	4.38984			7.77465	4.38984		7.51385	4.12784		7.28805	3.89834		7.09725	3.70134		6.94145	3.53684		6.66825
73		7.75456	4.37538		7.77442	4.38843		7.8332	4.42711		7.86414	4.44751		8.01593	4.54802			7.77442	4.38843		7.77442	4.38843		7.77442	4.38843		7.77442	4.38843		7.77442	4.38843			7.77442	4.38843		7.51362	4.12643		7.28782	3.89693		7.09702	3.69993		6.94122	3.53543		6.66802
74		7.75631	4.37528		7.77484	4.38745		7.83162	4.42482		7.86256	4.44522		8.01373	4.54531			7.77484	4.38745		7.77484	4.38745		7.77484	4.38745		7.77484	4.38745		7.77484	4.38745			7.77484	4.38745		7.51404	4.12545		7.28824	3.89595		7.09744	3.69895		6.94164	3.53445		6.66844
75		7.75806	4.37517		7.77459	4.38604		7.8307	4.42296		7.86032	4.44249		8.01088	4.54218			7.77459	4.38604		7.77459	4.38604		7.77459	4.38604		7.77459	4.38604		7.77459	4.38604			7.77459	4.38604		7.51379	4.12404		7.28799	3.89454		7.09719	3.69754		6.94139	3.53304		6.66819
76		7.76046	4.3755		7.77501	4.38506		7.82912	4.42067		7.85873	4.4402		8.00803	4.53904			7.77501	4.38506		7.77501	4.38506		7.77501	4.38506		7.77501	4.38506		7.77501	4.38506			7.77501	4.38506		7.51421	4.12306		7.28841	3.89356		7.09761	3.69656		6.94181	3.53206		6.66861
77		7.76286	4.37582		7.77542	4.38408		7.82819	4.41882		7.85714	4.4379		8.00517	4.53589			7.77542	4.38408		7.77542	4.38408		7.77542	4.38408		7.77542	4.38408		7.77542	4.38408			7.77542	4.38408		7.51462	4.12208		7.28882	3.89258		7.09802	3.69558		6.94222	3.53108		6.66902
78		7.76525	4.37615		7.77648	4.38353		7.82726	4.41696		7.85555	4.43561		8.0023	4.53275			7.77648	4.38353		7.77648	4.38353		7.77648	4.38353		7.77648	4.38353		7.77648	4.38353			7.77648	4.38353		7.51568	4.12153		7.28988	3.89203		7.09908	3.69503		6.94328	3.53053		6.67008
79		7.76764	4.37647		7.77688	4.38255		7.82633	4.4151		7.85396	4.43331		8.00008	4.53003			7.77688	4.38255		7.77688	4.38255		7.77688	4.38255		7.77688	4.38255		7.77688	4.38255			7.77688	4.38255		7.51608	4.12055		7.29028	3.89105		7.09948	3.69405		6.94368	3.52955		6.67048
80		7.77002	4.37679		7.77794	4.382		7.82539	4.41324		7.85301	4.43145		7.9972	4.52688			7.77794	4.382		7.77794	4.382		7.77794	4.382		7.77794	4.382		7.77794	4.382			7.77794	4.382		7.51714	4.12		7.29134	3.8905		7.10054	3.6935		6.94474	3.529		6.67154
81		7.78935	4.38386		7.79521	4.38772		7.8408	4.41775		7.8668	4.4349		8.008	4.52841			7.79521	4.38772		7.79521	4.38772		7.79521	4.38772		7.79521	4.38772		7.79521	4.38772			7.79521	4.38772		7.53441	4.12572		7.30861	3.89622		7.11781	3.69922		6.96201	3.53472		6.68881
82		7.79172	4.38419		7.79628	4.38719		7.8399	4.41593		7.86589	4.43307		8.00518	4.52531			7.79628	4.38719		7.79628	4.38719		7.79628	4.38719		7.79628	4.38719		7.79628	4.38719			7.79628	4.38719		7.53548	4.12519		7.30968	3.89569		7.11888	3.69869		6.96308	3.53419		6.68988
83		7.79474	4.38494		7.79735	4.38666		7.83965	4.41453		7.86498	4.43124		8.00235	4.5222			7.79735	4.38666		7.79735	4.38666		7.79735	4.38666		7.79735	4.38666		7.79735	4.38666			7.79735	4.38666		7.53655	4.12466		7.31075	3.89516		7.11995	3.69816		6.96415	3.53366		6.69095
84		7.79711	4.38527		7.79841	4.38612		7.8394	4.41313		7.86407	4.42941		7.99951	4.51909			7.79841	4.38612		7.79841	4.38612		7.79841	4.38612		7.79841	4.38612		7.79841	4.38612			7.79841	4.38612		7.53761	4.12412		7.31181	3.89462		7.12101	3.69762		6.96521	3.53312		6.69201
85		7.80012	4.38602		7.80012	4.38602		7.83914	4.41173		7.86316	4.42758		7.99667	4.51598			7.80012	4.38602		7.80012	4.38602		7.80012	4.38602		7.80012	4.38602		7.80012	4.38602			7.80012	4.38602		7.53932	4.12402		7.31352	3.89452		7.12272	3.69752		6.96692	3.53302		6.69372
86		7.80312	4.38677		7.80182	4.38591		7.83952	4.41076		7.86289	4.42618		7.99383	4.51287			7.80182	4.38591		7.80182	4.38591		7.80182	4.38591		7.80182	4.38591		7.80182	4.38591			7.80182	4.38591		7.54102	4.12391		7.31522	3.89441		7.12442	3.69741		6.96862	3.53291		6.69542
87		7.80612	4.38752		7.80352	4.38581		7.83926	4.40936		7.86197	4.42435		7.99098	4.50976			7.80352	4.38581		7.80352	4.38581		7.80352	4.38581		7.80352	4.38581		7.80352	4.38581			7.80352	4.38581		7.54272	4.12381		7.31692	3.89431		7.12612	3.69731		6.97032	3.53281		6.69712
88		7.80911	4.38827		7.80521	4.3857		7.83964	4.40839		7.86169	4.42295		7.98812	4.50664			7.80521	4.3857		7.80521	4.3857		7.80521	4.3857		7.80521	4.3857		7.80521	4.3857			7.80521	4.3857		7.54441	4.1237		7.31861	3.8942		7.12781	3.6972		6.97201	3.5327		6.69881
89		7.81209	4.38901		7.8069	4.38559		7.84001	4.40742		7.86141	4.42154		7.98526	4.50353			7.8069	4.38559		7.8069	4.38559		7.8069	4.38559		7.8069	4.38559		7.8069	4.38559			7.8069	4.38559		7.5461	4.12359		7.3203	3.89409		7.1295	3.69709		6.9737	3.53259		6.7005
90		7.81572	4.39019		7.80858	4.38548		7.84039	4.40645		7.86113	4.42014		7.98239	4.50041			7.80858	4.38548		7.80858	4.38548		7.80858	4.38548		7.80858	4.38548		7.80858	4.38548			7.80858	4.38548		7.54778	4.12348		7.32198	3.89398		7.13118	3.69698		6.97538	3.53248		6.70218
91		7.8187	4.39093		7.81091	4.3858		7.84075	4.40548		7.86085	4.41874		7.97952	4.49729			7.81091	4.3858		7.81091	4.3858		7.81091	4.3858		7.81091	4.3858		7.81091	4.3858			7.81091	4.3858		7.55011	4.1238		7.32431	3.8943		7.13351	3.6973		6.97771	3.5328		6.70451
92		7.82166	4.39167		7.81258	4.38568		7.84112	4.4045		7.86056	4.41733		7.97665	4.49417			7.81258	4.38568		7.81258	4.38568		7.81258	4.38568		7.81258	4.38568		7.81258	4.38568			7.81258	4.38568		7.55178	4.12368		7.32598	3.89418		7.13518	3.69718		6.97938	3.53268		6.70618
93		7.82527	4.39284		7.81489	4.386		7.84213	4.40396		7.86026	4.41593		7.97377	4.49105			7.81489	4.386		7.81489	4.386		7.81489	4.386		7.81489	4.386		7.81489	4.386			7.81489	4.386		7.55409	4.124		7.32829	3.8945		7.13749	3.6975		6.98169	3.533		6.70849
94		7.82823	4.39358		7.81721	4.38631		7.84248	4.40298		7.86061	4.41495		7.97088	4.48793			7.81721	4.38631		7.81721	4.38631		7.81721	4.38631		7.81721	4.38631		7.81721	4.38631			7.81721	4.38631		7.55641	4.12431		7.33061	3.89481		7.13981	3.69781		6.98401	3.53331		6.71081
95		7.83118	4.39432		7.81951	4.38662		7.84348	4.40243		7.86096	4.41397		7.96735	4.48438			7.81951	4.38662		7.81951	4.38662		7.81951	4.38662		7.81951	4.38662		7.81951	4.38662			7.81951	4.38662		7.55871	4.12462		7.33291	3.89512		7.14211	3.69812		6.98631	3.53362		6.71311
96		7.83477	4.39548		7.82246	4.38736		7.84448	4.40189		7.8613	4.41299		7.96446	4.48126			7.82246	4.38736		7.82246	4.38736		7.82246	4.38736		7.82246	4.38736		7.82246	4.38736			7.82246	4.38736		7.56166	4.12536		7.33586	3.89586		7.14506	3.69886		6.98926	3.53436		6.71606
97		7.83771	4.39621		7.82476	4.38767		7.84547	4.40134		7.86164	4.41201		7.96156	4.47814			7.82476	4.38767		7.82476	4.38767		7.82476	4.38767		7.82476	4.38767		7.82476	4.38767			7.82476	4.38767		7.56396	4.12567		7.33816	3.89617		7.14736	3.69917		6.99156	3.53467		6.71836
98		7.84128	4.39737		7.82769	4.38841		7.84711	4.40121		7.86198	4.41103		7.95866	4.47502			7.82769	4.38841		7.82769	4.38841		7.82769	4.38841		7.82769	4.38841		7.82769	4.38841			7.82769	4.38841		7.56689	4.12641		7.34109	3.89691		7.15029	3.69991		6.99449	3.53541		6.72129
99		7.84421	4.3981		7.82998	4.38871		7.84809	4.40066		7.86296	4.41048		7.95576	4.47189			7.82998	4.38871		7.82998	4.38871		7.82998	4.38871		7.82998	4.38871		7.82998	4.38871			7.82998	4.38871		7.56918	4.12671		7.34338	3.89721		7.15258	3.70021		6.99678	3.53571		6.72358
100		7.84778	4.39926		7.8329	4.38944		7.84971	4.40054		7.86328	4.4095		7.95285	4.46877			7.8329	4.38944		7.8329	4.38944		7.8329	4.38944		7.8329	4.38944		7.8329	4.38944			7.8329	4.38944		7.5721	4.12744		7.3463	3.89794		7.1555	3.70094		6.9997	3.53644		6.7265
101		7.85069	4.39999		7.83583	4.39017		7.85134	4.40041		7.86425	4.40894		7.94994	4.46564			7.83583	4.39017		7.83583	4.39017		7.83583	4.39017		7.83583	4.39017		7.83583	4.39017			7.83583	4.39017		7.57503	4.12817		7.34923	3.89867		7.15843	3.70167		7.00263	3.53717		6.72943
102		7.8536	4.40071		7.83874	4.3909		7.85295	4.40028		7.86522	4.40839		7.94702	4.46252			7.83874	4.3909		7.83874	4.3909		7.83874	4.3909		7.83874	4.3909		7.83874	4.3909			7.83874	4.3909		7.57794	4.1289		7.35214	3.8994		7.16134	3.7024		7.00554	3.5379		6.73234
103		7.85715	4.40186		7.84165	4.39163		7.85456	4.40016		7.86618	4.40783		7.94411	4.45939			7.84165	4.39163		7.84165	4.39163		7.84165	4.39163		7.84165	4.39163		7.84165	4.39163			7.84165	4.39163		7.58085	4.12963		7.35505	3.90013		7.16425	3.70313		7.00845	3.53863		6.73525
104		7.86004	4.40259		7.84455	4.39236		7.85617	4.40003		7.86714	4.40727		7.94119	4.45627			7.84455	4.39236		7.84455	4.39236		7.84455	4.39236		7.84455	4.39236		7.84455	4.39236			7.84455	4.39236		7.58375	4.13036		7.35795	3.90086		7.16715	3.70386		7.01135	3.53936		6.73815
105		7.86293	4.40331		7.84745	4.39308		7.85842	4.40032		7.86874	4.40714		7.93826	4.45315			7.84745	4.39308		7.84745	4.39308		7.84745	4.39308		7.84745	4.39308		7.84745	4.39308			7.84745	4.39308		7.58665	4.13108		7.36085	3.90158		7.17005	3.70458		7.01425	3.54008		6.74105
106		7.86582	4.40403		7.85099	4.39423		7.86066	4.40062		7.86969	4.40658		7.93598	4.45045			7.85099	4.39423		7.85099	4.39423		7.85099	4.39423		7.85099	4.39423		7.85099	4.39423			7.85099	4.39423		7.59019	4.13223		7.36439	3.90273		7.17359	3.70573		7.01779	3.54123		6.74459
107		7.8687	4.40475		7.85387	4.39495		7.86225	4.40049		7.87128	4.40645		7.93305	4.44732			7.85387	4.39495		7.85387	4.39495		7.85387	4.39495		7.85387	4.39495		7.85387	4.39495			7.85387	4.39495		7.59307	4.13295		7.36727	3.90345		7.17647	3.70645		7.02067	3.54195		6.74747
108		7.87157	4.40546		7.8574	4.3961		7.86513	4.40121		7.87286	4.40631		7.93012	4.4442			7.8574	4.3961		7.8574	4.3961		7.8574	4.3961		7.8574	4.3961		7.8574	4.3961			7.8574	4.3961		7.5966	4.1341		7.3708	3.9046		7.18	3.7076		7.0242	3.5431		6.751
109		7.87444	4.40618		7.86027	4.39682		7.86736	4.4015		7.87444	4.40618		7.92718	4.44107			7.86027	4.39682		7.86027	4.39682		7.86027	4.39682		7.86027	4.39682		7.86027	4.39682			7.86027	4.39682		7.59947	4.13482		7.37367	3.90532		7.18287	3.70832		7.02707	3.54382		6.75387
110		7.87666	4.40647		7.86379	4.39796		7.86958	4.40179		7.87602	4.40604		7.92489	4.43838			7.86379	4.39796		7.86379	4.39796		7.86379	4.39796		7.86379	4.39796		7.86379	4.39796			7.86379	4.39796		7.60299	4.13596		7.37719	3.90646		7.18639	3.70946		7.03059	3.54496		6.75739
111		7.87952	4.40718		7.8673	4.3991		7.87244	4.4025		7.87823	4.40633		7.92195	4.43525			7.8673	4.3991		7.8673	4.3991		7.8673	4.3991		7.8673	4.3991		7.8673	4.3991			7.8673	4.3991		7.6065	4.1371		7.3807	3.9076		7.1899	3.7106		7.0341	3.5461		6.7609
112		7.88237	4.40789		7.8708	4.40024		7.87466	4.40279		7.88045	4.40662		7.91965	4.43256			7.8708	4.40024		7.8708	4.40024		7.8708	4.40024		7.8708	4.40024		7.8708	4.40024			7.8708	4.40024		7.61	4.13824		7.3842	3.90874		7.1934	3.71174		7.0376	3.54724		6.7644
113		7.88458	4.40818		7.87429	4.40138		7.87751	4.4035		7.88201	4.40648		7.9167	4.42943			7.87429	4.40138		7.87429	4.40138		7.87429	4.40138		7.87429	4.40138		7.87429	4.40138			7.87429	4.40138		7.61349	4.13938		7.38769	3.90988		7.19689	3.71288		7.04109	3.54838		6.76789
114		7.88678	4.40846		7.87778	4.40251		7.88035	4.40421		7.88421	4.40676		7.9144	4.42674			7.87778	4.40251		7.87778	4.40251		7.87778	4.40251		7.87778	4.40251		7.87778	4.40251			7.87778	4.40251		7.61698	4.14051		7.39118	3.91101		7.20038	3.71401		7.04458	3.54951		6.77138
115		7.88897	4.40874		7.88127	4.40364		7.88319	4.40492		7.88705	4.40747		7.91209	4.42404			7.88127	4.40364		7.88127	4.40364		7.88127	4.40364		7.88127	4.40364		7.88127	4.40364			7.88127	4.40364		7.62047	4.14164		7.39467	3.91214		7.20387	3.71514		7.04807	3.55064		6.77487
116		7.89116	4.40902		7.88474	4.40478		7.88667	4.40605		7.88924	4.40775		7.90914	4.42092			7.88474	4.40478		7.88474	4.40478		7.88474	4.40478		7.88474	4.40478		7.88474	4.40478			7.88474	4.40478		7.62394	4.14278		7.39814	3.91328		7.20734	3.71628		7.05154	3.55178		6.77834
117		7.89335	4.40931		7.88822	4.40591		7.8895	4.40676		7.89207	4.40846		7.90683	4.41822			7.88822	4.40591		7.88822	4.40591		7.88822	4.40591		7.88822	4.40591		7.88822	4.40591			7.88822	4.40591		7.62742	4.14391		7.40162	3.91441		7.21082	3.71741		7.05502	3.55291		6.78182
118		7.89553	4.40958		7.89168	4.40704		7.89296	4.40789		7.89425	4.40874		7.90451	4.41553			7.89168	4.40704		7.89168	4.40704		7.89168	4.40704		7.89168	4.40704		7.89168	4.40704			7.89168	4.40704		7.63088	4.14504		7.40508	3.91554		7.21428	3.71854		7.05848	3.55404		6.78528
119		7.89707	4.40944		7.89578	4.40859		7.89642	4.40901		7.89707	4.40944		7.9022	4.41283			7.89578	4.40859		7.89578	4.40859		7.89578	4.40859		7.89578	4.40859		7.89578	4.40859			7.89578	4.40859		7.63498	4.14659		7.40918	3.91709		7.21838	3.72009		7.06258	3.55559		6.78938
120		7.8986	4.40929		7.89924	4.40971		7.89988	4.41014		7.89988	4.41014		7.90052	4.41056			7.89924	4.40971		7.89924	4.40971		7.89924	4.40971		7.89924	4.40971		7.89924	4.40971			7.89924	4.40971		7.63844	4.14771		7.41264	3.91821		7.22184	3.72121		7.06604	3.55671		6.79284
[truncated: 1 more columns]

## Sheet: Tab 2. PSZ, EGYH, MORH, LTVH
PSZ		LAB at 50 km																		LAB at 55 km																		LAB at 60 km
		no melt			melt 0.5%			melt 1%			melt 1.5%			melt 2%			melt 4%			no melt			melt 0.5%			melt 1%			melt 1.5%			melt 2%			melt 4%			no melt			melt 0.5%			melt 1%			melt 1.5%
		Vp	Vs		Vp	Vs		Vp	Vs		Vp	Vs		Vp	Vs		Vp	Vs		Vp	Vs		Vp	Vs		Vp	Vs		Vp	Vs		Vp	Vs		Vp	Vs		Vp	Vs		Vp	Vs		Vp	Vs		Vp	Vs
Depth
1		3.04	1.79833		3.04	1.79833		3.04	1.79833		3.04	1.79833		3.04	1.79833		3.04	1.79833		3.04	1.79833		3.04	1.79833		3.04	1.79833		3.04	1.79833		3.04	1.79833		3.04	1.79833		3.04	1.79833		3.04	1.79833		3.04	1.79833		3.04	1.79833
2		5.99353	3.6048		5.99353	3.6048		5.99353	3.6048		5.99353	3.6048		5.99353	3.6048		5.99353	3.6048		5.99353	3.6048		5.99353	3.6048		5.99353	3.6048		5.99353	3.6048		5.99353	3.6048		5.99353	3.6048		5.99353	3.6048		5.99353	3.6048		5.99353	3.6048		5.99353	3.6048
3		6.00017	3.60464		6.00017	3.60464		6.00017	3.60464		6.00017	3.60464		6.00017	3.60464		6.00017	3.60464		6.00017	3.60464		6.00017	3.60464		6.00017	3.60464		6.00017	3.60464		6.00017	3.60464		6.00017	3.60464		6.00017	3.60464		6.00017	3.60464		6.00017	3.60464		6.00017	3.60464
4		6.0068	3.60448		6.0068	3.60448		6.0068	3.60448		6.0068	3.60448		6.0068	3.60448		6.0068	3.60448		6.0068	3.60448		6.0068	3.60448		6.0068	3.60448		6.0068	3.60448		6.0068	3.60448		6.0068	3.60448		6.0068	3.60448		6.0068	3.60448		6.0068	3.60448		6.0068	3.60448
5		6.01343	3.60433		6.01343	3.60433		6.01343	3.60433		6.01343	3.60433		6.01343	3.60433		6.01343	3.60433		6.01343	3.60433		6.01343	3.60433		6.01343	3.60433		6.01343	3.60433		6.01343	3.60433		6.01343	3.60433		6.01343	3.60433		6.01343	3.60433		6.01343	3.60433		6.01343	3.60433
6		6.02007	3.60417		6.02007	3.60417		6.02007	3.60417		6.02007	3.60417		6.02007	3.60417		6.02007	3.60417		6.02007	3.60417		6.02007	3.60417		6.02007	3.60417		6.02007	3.60417		6.02007	3.60417		6.02007	3.60417		6.02007	3.60417		6.02007	3.60417		6.02007	3.60417		6.02007	3.60417
7		6.03623	3.60704		6.03623	3.60704		6.03623	3.60704		6.03623	3.60704		6.03623	3.60704		6.03623	3.60704		6.03623	3.60704		6.03623	3.60704		6.03623	3.60704		6.03623	3.60704		6.03623	3.60704		6.03623	3.60704		6.03623	3.60704		6.03623	3.60704		6.03623	3.60704		6.03623	3.60704
8		6.05239	3.60991		6.05239	3.60991		6.05239	3.60991		6.05239	3.60991		6.05239	3.60991		6.05239	3.60991		6.05239	3.60991		6.05239	3.60991		6.05239	3.60991		6.05239	3.60991		6.05239	3.60991		6.05239	3.60991		6.05239	3.60991		6.05239	3.60991		6.05239	3.60991		6.05239	3.60991
9		6.06855	3.61278		6.06855	3.61278		6.06855	3.61278		6.06855	3.61278		6.06855	3.61278		6.06855	3.61278		6.06855	3.61278		6.06855	3.61278		6.06855	3.61278		6.06855	3.61278		6.06855	3.61278		6.06855	3.61278		6.06855	3.61278		6.06855	3.61278		6.06855	3.61278		6.06855	3.61278
10		6.08471	3.61565		6.08471	3.61565		6.08471	3.61565		6.08471	3.61565		6.08471	3.61565		6.08471	3.61565		6.08471	3.61565		6.08471	3.61565		6.08471	3.61565		6.08471	3.61565		6.08471	3.61565		6.08471	3.61565		6.08471	3.61565		6.08471	3.61565		6.08471	3.61565		6.08471	3.61565
11		6.12269	3.62394		6.12269	3.62394		6.12269	3.62394		6.12269	3.62394		6.12269	3.62394		6.12269	3.62394		6.12269	3.62394		6.12269	3.62394		6.12269	3.62394		6.12269	3.62394		6.12269	3.62394		6.12269	3.62394		6.12269	3.62394		6.12269	3.62394		6.12269	3.62394		6.12269	3.62394
12		6.16067	3.63224		6.16067	3.63224		6.16067	3.63224		6.16067	3.63224		6.16067	3.63224		6.16067	3.63224		6.16067	3.63224		6.16067	3.63224		6.16067	3.63224		6.16067	3.63224		6.16067	3.63224		6.16067	3.63224		6.16067	3.63224		6.16067	3.63224		6.16067	3.63224		6.16067	3.63224
13		6.19865	3.64054		6.19865	3.64054		6.19865	3.64054		6.19865	3.64054		6.19865	3.64054		6.19865	3.64054		6.19865	3.64054		6.19865	3.64054		6.19865	3.64054		6.19865	3.64054		6.19865	3.64054		6.19865	3.64054		6.19865	3.64054		6.19865	3.64054		6.19865	3.64054		6.19865	3.64054
14		6.23663	3.64884		6.23663	3.64884		6.23663	3.64884		6.23663	3.64884		6.23663	3.64884		6.23663	3.64884		6.23663	3.64884		6.23663	3.64884		6.23663	3.64884		6.23663	3.64884		6.23663	3.64884		6.23663	3.64884		6.23663	3.64884		6.23663	3.64884		6.23663	3.64884		6.23663	3.64884
15		6.27461	3.65713		6.27461	3.65713		6.27461	3.65713		6.27461	3.65713		6.27461	3.65713		6.27461	3.65713		6.27461	3.65713		6.27461	3.65713		6.27461	3.65713		6.27461	3.65713		6.27461	3.65713		6.27461	3.65713		6.27461	3.65713		6.27461	3.65713		6.27461	3.65713		6.27461	3.65713
16		6.31259	3.66543		6.31259	3.66543		6.31259	3.66543		6.31259	3.66543		6.31259	3.66543		6.31259	3.66543		6.31259	3.66543		6.31259	3.66543		6.31259	3.66543		6.31259	3.66543		6.31259	3.66543		6.31259	3.66543		6.31259	3.66543		6.31259	3.66543		6.31259	3.66543		6.31259	3.66543
17		6.37487	3.68007		6.37487	3.68007		6.37487	3.68007		6.37487	3.68007		6.37487	3.68007		6.37487	3.68007		6.37487	3.68007		6.37487	3.68007		6.37487	3.68007		6.37487	3.68007		6.37487	3.68007		6.37487	3.68007		6.37487	3.68007		6.37487	3.68007		6.37487	3.68007		6.37487	3.68007
18		6.43715	3.6947		6.43715	3.6947		6.43715	3.6947		6.43715	3.6947		6.43715	3.6947		6.43715	3.6947		6.43715	3.6947		6.43715	3.6947		6.43715	3.6947		6.43715	3.6947		6.43715	3.6947		6.43715	3.6947		6.43715	3.6947		6.43715	3.6947		6.43715	3.6947		6.43715	3.6947
19		6.49943	3.70933		6.49943	3.70933		6.49943	3.70933		6.49943	3.70933		6.49943	3.70933		6.49943	3.70933		6.49943	3.70933		6.49943	3.70933		6.49943	3.70933		6.49943	3.70933		6.49943	3.70933		6.49943	3.70933		6.49943	3.70933		6.49943	3.70933		6.49943	3.70933		6.49943	3.70933
20		6.5617	3.72397		6.5617	3.72397		6.5617	3.72397		6.5617	3.72397		6.5617	3.72397		6.5617	3.72397		6.5617	3.72397		6.5617	3.72397		6.5617	3.72397		6.5617	3.72397		6.5617	3.72397		6.5617	3.72397		6.5617	3.72397		6.5617	3.72397		6.5617	3.72397		6.5617	3.72397
21		6.62398	3.7386		6.62398	3.7386		6.62398	3.7386		6.62398	3.7386		6.62398	3.7386		6.62398	3.7386		6.62398	3.7386		6.62398	3.7386		6.62398	3.7386		6.62398	3.7386		6.62398	3.7386		6.62398	3.7386		6.62398	3.7386		6.62398	3.7386		6.62398	3.7386		6.62398	3.7386
22		6.68626	3.75324		6.68626	3.75324		6.68626	3.75324		6.68626	3.75324		6.68626	3.75324		6.68626	3.75324		6.68626	3.75324		6.68626	3.75324		6.68626	3.75324		6.68626	3.75324		6.68626	3.75324		6.68626	3.75324		6.68626	3.75324		6.68626	3.75324		6.68626	3.75324		6.68626	3.75324
23		6.77172	3.79326		6.77172	3.79326		6.77172	3.79326		6.77172	3.79326		6.77172	3.79326		6.77172	3.79326		6.77172	3.79326		6.77172	3.79326		6.77172	3.79326		6.77172	3.79326		6.77172	3.79326		6.77172	3.79326		6.77172	3.79326		6.77172	3.79326		6.77172	3.79326		6.77172	3.79326
24		6.85718	3.83329		6.85718	3.83329		6.85718	3.83329		6.85718	3.83329		6.85718	3.83329		6.85718	3.83329		6.85718	3.83329		6.85718	3.83329		6.85718	3.83329		6.85718	3.83329		6.85718	3.83329		6.85718	3.83329		6.85718	3.83329		6.85718	3.83329		6.85718	3.83329		6.85718	3.83329
25		6.94264	3.87331		6.94264	3.87331		6.94264	3.87331		6.94264	3.87331		6.94264	3.87331		6.94264	3.87331		6.94264	3.87331		6.94264	3.87331		6.94264	3.87331		6.94264	3.87331		6.94264	3.87331		6.94264	3.87331		6.94264	3.87331		6.94264	3.87331		6.94264	3.87331		6.94264	3.87331
26		7.0281	3.91333		7.0281	3.91333		7.0281	3.91333		7.0281	3.91333		7.0281	3.91333		7.0281	3.91333		7.0281	3.91333		7.0281	3.91333		7.0281	3.91333		7.0281	3.91333		7.0281	3.91333		7.0281	3.91333		7.0281	3.91333		7.0281	3.91333		7.0281	3.91333		7.0281	3.91333
27		7.11356	3.95336		7.11356	3.95336		7.11356	3.95336		7.11356	3.95336		7.11356	3.95336		7.11356	3.95336		7.11356	3.95336		7.11356	3.95336		7.11356	3.95336		7.11356	3.95336		7.11356	3.95336		7.11356	3.95336		7.11356	3.95336		7.11356	3.95336		7.11356	3.95336		7.11356	3.95336
28		7.19902	3.99338		7.19902	3.99338		7.19902	3.99338		7.19902	3.99338		7.19902	3.99338		7.19902	3.99338		7.19902	3.99338		7.19902	3.99338		7.19902	3.99338		7.19902	3.99338		7.19902	3.99338		7.19902	3.99338		7.19902	3.99338		7.19902	3.99338		7.19902	3.99338		7.19902	3.99338
29		7.2712	4.03983		7.2712	4.03983		7.2712	4.03983		7.2712	4.03983		7.2712	4.03983		7.2712	4.03983		7.2712	4.03983		7.2712	4.03983		7.2712	4.03983		7.2712	4.03983		7.2712	4.03983		7.2712	4.03983		7.2712	4.03983		7.2712	4.03983		7.2712	4.03983		7.2712	4.03983
30		7.34339	4.08627		7.34339	4.08627		7.34339	4.08627		7.34339	4.08627		7.34339	4.08627		7.34339	4.08627		7.34339	4.08627		7.34339	4.08627		7.34339	4.08627		7.34339	4.08627		7.34339	4.08627		7.34339	4.08627		7.34339	4.08627		7.34339	4.08627		7.34339	4.08627		7.34339	4.08627
31		7.41557	4.13271		7.41557	4.13271		7.41557	4.13271		7.41557	4.13271		7.41557	4.13271		7.41557	4.13271		7.41557	4.13271		7.41557	4.13271		7.41557	4.13271		7.41557	4.13271		7.41557	4.13271		7.41557	4.13271		7.41557	4.13271		7.41557	4.13271		7.41557	4.13271		7.41557	4.13271
32		7.48775	4.17916		7.48775	4.17916		7.48775	4.17916		7.48775	4.17916		7.48775	4.17916		7.48775	4.17916		7.48775	4.17916		7.48775	4.17916		7.48775	4.17916		7.48775	4.17916		7.48775	4.17916		7.48775	4.17916		7.48775	4.17916		7.48775	4.17916		7.48775	4.17916		7.48775	4.17916
33		7.55993	4.2256		7.55993	4.2256		7.55993	4.2256		7.55993	4.2256		7.55993	4.2256		7.55993	4.2256		7.55993	4.2256		7.55993	4.2256		7.55993	4.2256		7.55993	4.2256		7.55993	4.2256		7.55993	4.2256		7.55993	4.2256		7.55993	4.2256		7.55993	4.2256		7.55993	4.2256
34		7.89721	4.51974		7.89721	4.51974		7.89721	4.51974		7.89721	4.51974		7.89721	4.51974		7.89721	4.51974		7.89721	4.51974		7.89721	4.51974		7.89721	4.51974		7.89721	4.51974		7.89721	4.51974		7.89721	4.51974		7.89721	4.51974		7.89721	4.51974		7.89721	4.51974		7.89721	4.51974
35		7.89061	4.51405		7.89061	4.51405		7.89061	4.51405		7.89061	4.51405		7.89061	4.51405		7.89061	4.51405		7.89061	4.51405		7.89061	4.51405		7.89061	4.51405		7.89061	4.51405		7.89061	4.51405		7.89061	4.51405		7.89061	4.51405		7.89061	4.51405		7.89061	4.51405		7.89061	4.51405
36		7.88398	4.50835		7.88398	4.50835		7.88398	4.50835		7.88398	4.50835		7.88398	4.50835		7.88398	4.50835		7.88398	4.50835		7.88398	4.50835		7.88398	4.50835		7.88398	4.50835		7.88398	4.50835		7.88398	4.50835		7.88398	4.50835		7.88398	4.50835		7.88398	4.50835		7.88398	4.50835
37		7.87734	4.50265		7.87734	4.50265		7.87734	4.50265		7.87734	4.50265		7.87734	4.50265		7.87734	4.50265		7.87734	4.50265		7.87734	4.50265		7.87734	4.50265		7.87734	4.50265		7.87734	4.50265		7.87734	4.50265		7.87734	4.50265		7.87734	4.50265		7.87734	4.50265		7.87734	4.50265
38		7.87133	4.49737		7.87133	4.49737		7.87133	4.49737		7.87133	4.49737		7.87133	4.49737		7.87133	4.49737		7.87133	4.49737		7.87133	4.49737		7.87133	4.49737		7.87133	4.49737		7.87133	4.49737		7.87133	4.49737		7.87133	4.49737		7.87133	4.49737		7.87133	4.49737		7.87133	4.49737
39		7.86532	4.49209		7.86532	4.49209		7.86532	4.49209		7.86532	4.49209		7.86532	4.49209		7.86532	4.49209		7.86532	4.49209		7.86532	4.49209		7.86532	4.49209		7.86532	4.49209		7.86532	4.49209		7.86532	4.49209		7.86532	4.49209		7.86532	4.49209		7.86532	4.49209		7.86532	4.49209
40		7.85929	4.4868		7.85929	4.4868		7.85929	4.4868		7.85929	4.4868		7.85929	4.4868		7.85929	4.4868		7.85929	4.4868		7.85929	4.4868		7.85929	4.4868		7.85929	4.4868		7.85929	4.4868		7.85929	4.4868		7.85929	4.4868		7.85929	4.4868		7.85929	4.4868		7.85929	4.4868
41		7.85391	4.48194		7.85391	4.48194		7.85391	4.48194		7.85391	4.48194		7.85391	4.48194		7.85391	4.48194		7.85391	4.48194		7.85391	4.48194		7.85391	4.48194		7.85391	4.48194		7.85391	4.48194		7.85391	4.48194		7.85391	4.48194		7.85391	4.48194		7.85391	4.48194		7.85391	4.48194
42		7.84852	4.47707		7.84852	4.47707		7.84852	4.47707		7.84852	4.47707		7.84852	4.47707		7.84852	4.47707		7.84852	4.47707		7.84852	4.47707		7.84852	4.47707		7.84852	4.47707		7.84852	4.47707		7.84852	4.47707		7.84852	4.47707		7.84852	4.47707		7.84852	4.47707		7.84852	4.47707
43		7.84313	4.4722		7.84313	4.4722		7.84313	4.4722		7.84313	4.4722		7.84313	4.4722		7.84313	4.4722		7.84313	4.4722		7.84313	4.4722		7.84313	4.4722		7.84313	4.4722		7.84313	4.4722		7.84313	4.4722		7.84313	4.4722		7.84313	4.4722		7.84313	4.4722		7.84313	4.4722
44		7.83772	4.46733		7.83772	4.46733		7.83772	4.46733		7.83772	4.46733		7.83772	4.46733		7.83772	4.46733		7.83772	4.46733		7.83772	4.46733		7.83772	4.46733		7.83772	4.46733		7.83772	4.46733		7.83772	4.46733		7.83772	4.46733		7.83772	4.46733		7.83772	4.46733		7.83772	4.46733
45		7.83296	4.46289		7.83296	4.46289		7.83296	4.46289		7.83296	4.46289		7.83296	4.46289		7.83296	4.46289		7.83296	4.46289		7.83296	4.46289		7.83296	4.46289		7.83296	4.46289		7.83296	4.46289		7.83296	4.46289		7.83296	4.46289		7.83296	4.46289		7.83296	4.46289		7.83296	4.46289
46		7.82464	4.45615		7.82464	4.45615		7.82464	4.45615		7.82464	4.45615		7.82464	4.45615		7.82464	4.45615		7.8282	4.45845		7.8282	4.45845		7.8282	4.45845		7.8282	4.45845		7.8282	4.45845		7.8282	4.45845		7.8282	4.45845		7.8282	4.45845		7.8282	4.45845		7.8282	4.45845
47		7.81407	4.44798		7.81407	4.44798		7.81407	4.44798		7.81407	4.44798		7.81407	4.44798		7.81407	4.44798		7.82409	4.45444		7.82409	4.45444		7.82409	4.45444		7.82409	4.45444		7.82409	4.45444		7.82409	4.45444		7.82409	4.45444		7.82409	4.45444		7.82409	4.45444		7.82409	4.45444
48		7.79825	4.43641		7.79825	4.43641		7.79825	4.43641		7.79825	4.43641		7.79825	4.43641		7.79825	4.43641		7.81998	4.45043		7.81998	4.45043		7.81998	4.45043		7.81998	4.45043		7.81998	4.45043		7.81998	4.45043		7.81998	4.45043		7.81998	4.45043		7.81998	4.45043		7.81998	4.45043
49		7.77293	4.41872		7.77293	4.41872		7.77293	4.41872		7.77293	4.41872		7.77293	4.41872		7.77293	4.41872		7.81586	4.44642		7.81586	4.44642		7.81586	4.44642		7.81586	4.44642		7.81586	4.44642		7.81586	4.44642		7.81586	4.44642		7.81586	4.44642		7.81586	4.44642		7.81586	4.44642
50		7.73048	4.38996		7.73048	4.38996		7.73048	4.38996		7.73048	4.38996		7.73048	4.38996		7.73048	4.38996		7.81174	4.44241		7.81174	4.44241		7.81174	4.44241		7.81174	4.44241		7.81174	4.44241		7.81174	4.44241		7.81174	4.44241		7.81174	4.44241		7.81174	4.44241		7.81174	4.44241
51		7.81263	4.44168		7.55183	4.17968		7.32603	3.95018		7.13523	3.75318		6.97943	3.58868		6.70623	3.25568		7.80474	4.43655		7.80474	4.43655		7.80474	4.43655		7.80474	4.43655		7.80474	4.43655		7.80474	4.43655		7.80827	4.43883		7.80827	4.43883		7.80827	4.43883		7.80827	4.43883
52		7.80915	4.43809		7.54835	4.17609		7.32255	3.94659		7.13175	3.74959		6.97595	3.58509		6.70275	3.25209		7.79487	4.42885		7.79487	4.42885		7.79487	4.42885		7.79487	4.42885		7.79487	4.42885		7.79487	4.42885		7.8048	4.43525		7.8048	4.43525		7.8048	4.43525		7.8048	4.43525
53		7.80567	4.4345		7.54487	4.1725		7.31907	3.943		7.12827	3.746		6.97247	3.5815		6.69927	3.2485		7.77979	4.41779		7.77979	4.41779		7.77979	4.41779		7.77979	4.41779		7.77979	4.41779		7.77979	4.41779		7.80133	4.43166		7.80133	4.43166		7.80133	4.43166		7.80133	4.43166
54		7.80218	4.43092		7.54138	4.16892		7.31558	3.93942		7.12478	3.74242		6.96898	3.57792		6.69578	3.24492		7.75529	4.40065		7.75529	4.40065		7.75529	4.40065		7.75529	4.40065		7.75529	4.40065		7.75529	4.40065		7.79785	4.42808		7.79785	4.42808		7.79785	4.42808		7.79785	4.42808
55		7.79936	4.42776		7.53856	4.16576		7.31276	3.93626		7.12196	3.73926		6.96616	3.57476		6.69296	3.24176		7.71443	4.37297		7.71443	4.37297		7.71443	4.37297		7.71443	4.37297		7.71443	4.37297		7.71443	4.37297		7.79502	4.42494		7.79502	4.42494		7.79502	4.42494		7.79502	4.42494
56		7.79652	4.42461		7.53572	4.16261		7.30992	3.93311		7.11912	3.73611		6.96332	3.57161		6.69012	3.23861		7.79652	4.42461		7.53572	4.16261		7.30992	3.93311		7.11912	3.73611		6.96332	3.57161		6.69012	3.23861		7.7887	4.41954		7.7887	4.41954		7.7887	4.41954		7.7887	4.41954
57		7.79435	4.4219		7.53355	4.1599		7.30775	3.9304		7.11695	3.7334		6.96115	3.5689		6.68795	3.2359		7.79435	4.4219		7.53355	4.1599		7.30775	3.9304		7.11695	3.7334		6.96115	3.5689		6.68795	3.2359		7.78018	4.41273		7.78018	4.41273		7.78018	4.41273		7.78018	4.41273
58		7.79152	4.41874		7.53072	4.15674		7.30492	3.92724		7.11412	3.73024		6.95832	3.56574		6.68512	3.23274		7.79152	4.41874		7.53072	4.15674		7.30492	3.92724		7.11412	3.73024		6.95832	3.56574		6.68512	3.23274		7.76582	4.40216		7.76582	4.40216		7.76582	4.40216		7.76582	4.40216
59		7.78934	4.41603		7.52854	4.15403		7.30274	3.92453		7.11194	3.72753		6.95614	3.56303		6.68294	3.23003		7.78934	4.41603		7.52854	4.15403		7.30274	3.92453		7.11194	3.72753		6.95614	3.56303		6.68294	3.23003		7.74275	4.38599		7.74275	4.38599		7.74275	4.38599		7.74275	4.38599
60		7.78716	4.41331		7.52636	4.15131		7.30056	3.92181		7.10976	3.72481		6.95396	3.56031		6.68076	3.22731		7.78716	4.41331		7.52636	4.15131		7.30056	3.92181		7.10976	3.72481		6.95396	3.56031		6.68076	3.22731		7.70276	4.35891		7.70276	4.35891		7.70276	4.35891		7.70276	4.35891
61		7.78564	4.41103		7.52484	4.14903		7.29904	3.91953		7.10824	3.72253		6.95244	3.55803		6.67924	3.22503		7.78564	4.41103		7.52484	4.14903		7.29904	3.91953		7.10824	3.72253		6.95244	3.55803		6.67924	3.22503		7.78564	4.41103		7.52484	4.14903		7.29904	3.91953		7.10824	3.72253
62		7.78345	4.40831		7.52265	4.14631		7.29685	3.91681		7.10605	3.71981		6.95025	3.55531		6.67705	3.22231		7.78345	4.40831		7.52265	4.14631		7.29685	3.91681		7.10605	3.71981		6.95025	3.55531		6.67705	3.22231		7.78345	4.40831		7.52265	4.14631		7.29685	3.91681		7.10605	3.71981
63		7.78192	4.40603		7.52112	4.14403		7.29532	3.91453		7.10452	3.71753		6.94872	3.55303		6.67552	3.22003		7.78192	4.40603		7.52112	4.14403		7.29532	3.91453		7.10452	3.71753		6.94872	3.55303		6.67552	3.22003		7.78192	4.40603		7.52112	4.14403		7.29532	3.91453		7.10452	3.71753
64		7.78039	4.40375		7.51959	4.14175		7.29379	3.91225		7.10299	3.71525		6.94719	3.55075		6.67399	3.21775		7.78039	4.40375		7.51959	4.14175		7.29379	3.91225		7.10299	3.71525		6.94719	3.55075		6.67399	3.21775		7.78039	4.40375		7.51959	4.14175		7.29379	3.91225		7.10299	3.71525
65		7.77952	4.4019		7.51872	4.1399		7.29292	3.9104		7.10212	3.7134		6.94632	3.5489		6.67312	3.2159		7.77952	4.4019		7.51872	4.1399		7.29292	3.9104		7.10212	3.7134		6.94632	3.5489		6.67312	3.2159		7.77952	4.4019		7.51872	4.1399		7.29292	3.9104		7.10212	3.7134
66		7.77798	4.39962		7.51718	4.13762		7.29138	3.90812		7.10058	3.71112		6.94478	3.54662		6.67158	3.21362		7.77798	4.39962		7.51718	4.13762		7.29138	3.90812		7.10058	3.71112		6.94478	3.54662		6.67158	3.21362		7.77798	4.39962		7.51718	4.13762		7.29138	3.90812		7.10058	3.71112
67		7.77711	4.39777		7.51631	4.13577		7.29051	3.90627		7.09971	3.70927		6.94391	3.54477		6.67071	3.21177		7.77711	4.39777		7.51631	4.13577		7.29051	3.90627		7.09971	3.70927		6.94391	3.54477		6.67071	3.21177		7.77711	4.39777		7.51631	4.13577		7.29051	3.90627		7.09971	3.70927
68		7.77622	4.39593		7.51542	4.13393		7.28962	3.90443		7.09882	3.70743		6.94302	3.54293		6.66982	3.20993		7.77622	4.39593		7.51542	4.13393		7.28962	3.90443		7.09882	3.70743		6.94302	3.54293		6.66982	3.20993		7.77622	4.39593		7.51542	4.13393		7.28962	3.90443		7.09882	3.70743
69		7.776	4.39451		7.5152	4.13251		7.2894	3.90301		7.0986	3.70601		6.9428	3.54151		6.6696	3.20851		7.776	4.39451		7.5152	4.13251		7.2894	3.90301		7.0986	3.70601		6.9428	3.54151		6.6696	3.20851		7.776	4.39451		7.5152	4.13251		7.2894	3.90301		7.0986	3.70601
70		7.77511	4.39267		7.51431	4.13067		7.28851	3.90117		7.09771	3.70417		6.94191	3.53967		6.66871	3.20667		7.77511	4.39267		7.51431	4.13067		7.28851	3.90117		7.09771	3.70417		6.94191	3.53967		6.66871	3.20667		7.77511	4.39267		7.51431	4.13067		7.28851	3.90117		7.09771	3.70417
71		7.77489	4.39125		7.51409	4.12925		7.28829	3.89975		7.09749	3.70275		6.94169	3.53825		6.66849	3.20525		7.77489	4.39125		7.51409	4.12925		7.28829	3.89975		7.09749	3.70275		6.94169	3.53825		6.66849	3.20525		7.77489	4.39125		7.51409	4.12925		7.28829	3.89975		7.09749	3.70275
72		7.77465	4.38984		7.51385	4.12784		7.28805	3.89834		7.09725	3.70134		6.94145	3.53684		6.66825	3.20384		7.77465	4.38984		7.51385	4.12784		7.28805	3.89834		7.09725	3.70134		6.94145	3.53684		6.66825	3.20384		7.77465	4.38984		7.51385	4.12784		7.28805	3.89834		7.09725	3.70134
73		7.77442	4.38843		7.51362	4.12643		7.28782	3.89693		7.09702	3.69993		6.94122	3.53543		6.66802	3.20243		7.77442	4.38843		7.51362	4.12643		7.28782	3.89693		7.09702	3.69993		6.94122	3.53543		6.66802	3.20243		7.77442	4.38843		7.51362	4.12643		7.28782	3.89693		7.09702	3.69993
74		7.77484	4.38745		7.51404	4.12545		7.28824	3.89595		7.09744	3.69895		6.94164	3.53445		6.66844	3.20145		7.77484	4.38745		7.51404	4.12545		7.28824	3.89595		7.09744	3.69895		6.94164	3.53445		6.66844	3.20145		7.77484	4.38745		7.51404	4.12545		7.28824	3.89595		7.09744	3.69895
75		7.77459	4.38604		7.51379	4.12404		7.28799	3.89454		7.09719	3.69754		6.94139	3.53304		6.66819	3.20004		7.77459	4.38604		7.51379	4.12404		7.28799	3.89454		7.09719	3.69754		6.94139	3.53304		6.66819	3.20004		7.77459	4.38604		7.51379	4.12404		7.28799	3.89454		7.09719	3.69754
76		7.77501	4.38506		7.51421	4.12306		7.28841	3.89356		7.09761	3.69656		6.94181	3.53206		6.66861	3.19906		7.77501	4.38506		7.51421	4.12306		7.28841	3.89356		7.09761	3.69656		6.94181	3.53206		6.66861	3.19906		7.77501	4.38506		7.51421	4.12306		7.28841	3.89356		7.09761	3.69656
77		7.77542	4.38408		7.51462	4.12208		7.28882	3.89258		7.09802	3.69558		6.94222	3.53108		6.66902	3.19808		7.77542	4.38408		7.51462	4.12208		7.28882	3.89258		7.09802	3.69558		6.94222	3.53108		6.66902	3.19808		7.77542	4.38408		7.51462	4.12208		7.28882	3.89258		7.09802	3.69558
78		7.77648	4.38353		7.51568	4.12153		7.28988	3.89203		7.09908	3.69503		6.94328	3.53053		6.67008	3.19753		7.77648	4.38353		7.51568	4.12153		7.28988	3.89203		7.09908	3.69503		6.94328	3.53053		6.67008	3.19753		7.77648	4.38353		7.51568	4.12153		7.28988	3.89203		7.09908	3.69503
79		7.77688	4.38255		7.51608	4.12055		7.29028	3.89105		7.09948	3.69405		6.94368	3.52955		6.67048	3.19655		7.77688	4.38255		7.51608	4.12055		7.29028	3.89105		7.09948	3.69405		6.94368	3.52955		6.67048	3.19655		7.77688	4.38255		7.51608	4.12055		7.29028	3.89105		7.09948	3.69405
80		7.77794	4.382		7.51714	4.12		7.29134	3.8905		7.10054	3.6935		6.94474	3.529		6.67154	3.196		7.77794	4.382		7.51714	4.12		7.29134	3.8905		7.10054	3.6935		6.94474	3.529		6.67154	3.196		7.77794	4.382		7.51714	4.12		7.29134	3.8905		7.10054	3.6935
81		7.79521	4.38772		7.53441	4.12572		7.30861	3.89622		7.11781	3.69922		6.96201	3.53472		6.68881	3.20172		7.79521	4.38772		7.53441	4.12572		7.30861	3.89622		7.11781	3.69922		6.96201	3.53472		6.68881	3.20172		7.79521	4.38772		7.53441	4.12572		7.30861	3.89622		7.11781	3.69922
82		7.79628	4.38719		7.53548	4.12519		7.30968	3.89569		7.11888	3.69869		6.96308	3.53419		6.68988	3.20119		7.79628	4.38719		7.53548	4.12519		7.30968	3.89569		7.11888	3.69869		6.96308	3.53419		6.68988	3.20119		7.79628	4.38719		7.53548	4.12519		7.30968	3.89569		7.11888	3.69869
83		7.79735	4.38666		7.53655	4.12466		7.31075	3.89516		7.11995	3.69816		6.96415	3.53366		6.69095	3.20066		7.79735	4.38666		7.53655	4.12466		7.31075	3.89516		7.11995	3.69816		6.96415	3.53366		6.69095	3.20066		7.79735	4.38666		7.53655	4.12466		7.31075	3.89516		7.11995	3.69816
84		7.79841	4.38612		7.53761	4.12412		7.31181	3.89462		7.12101	3.69762		6.96521	3.53312		6.69201	3.20012		7.79841	4.38612		7.53761	4.12412		7.31181	3.89462		7.12101	3.69762		6.96521	3.53312		6.69201	3.20012		7.79841	4.38612		7.53761	4.12412		7.31181	3.89462		7.12101	3.69762
85		7.80012	4.38602		7.53932	4.12402		7.31352	3.89452		7.12272	3.69752		6.96692	3.53302		6.69372	3.20002		7.80012	4.38602		7.53932	4.12402		7.31352	3.89452		7.12272	3.69752		6.96692	3.53302		6.69372	3.20002		7.80012	4.38602		7.53932	4.12402		7.31352	3.89452		7.12272	3.69752
86		7.80182	4.38591		7.54102	4.12391		7.31522	3.89441		7.12442	3.69741		6.96862	3.53291		6.69542	3.19991		7.80182	4.38591		7.54102	4.12391		7.31522	3.89441		7.12442	3.69741		6.96862	3.53291		6.69542	3.19991		7.80182	4.38591		7.54102	4.12391		7.31522	3.89441		7.12442	3.69741
87		7.80352	4.38581		7.54272	4.12381		7.31692	3.89431		7.12612	3.69731		6.97032	3.53281		6.69712	3.19981		7.80352	4.38581		7.54272	4.12381		7.31692	3.89431		7.12612	3.69731		6.97032	3.53281		6.69712	3.19981		7.80352	4.38581		7.54272	4.12381		7.31692	3.89431		7.12612	3.69731
88		7.80521	4.3857		7.54441	4.1237		7.31861	3.8942		7.12781	3.6972		6.97201	3.5327		6.69881	3.1997		7.80521	4.3857		7.54441	4.1237		7.31861	3.8942		7.12781	3.6972		6.97201	3.5327		6.69881	3.1997		7.80521	4.3857		7.54441	4.1237		7.31861	3.8942		7.12781	3.6972
89		7.8069	4.38559		7.5461	4.12359		7.3203	3.89409		7.1295	3.69709		6.9737	3.53259		6.7005	3.19959		7.8069	4.38559		7.5461	4.12359		7.3203	3.89409		7.1295	3.69709		6.9737	3.53259		6.7005	3.19959		7.8069	4.38559		7.5461	4.12359		7.3203	3.89409		7.1295	3.69709
90		7.80858	4.38548		7.54778	4.12348		7.32198	3.89398		7.13118	3.69698		6.97538	3.53248		6.70218	3.19948		7.80858	4.38548		7.54778	4.12348		7.32198	3.89398		7.13118	3.69698		6.97538	3.53248		6.70218	3.19948		7.80858	4.38548		7.54778	4.12348		7.32198	3.89398		7.13118	3.69698
91		7.81091	4.3858		7.55011	4.1238		7.32431	3.8943		7.13351	3.6973		6.97771	3.5328		6.70451	3.1998		7.81091	4.3858		7.55011	4.1238		7.32431	3.8943		7.13351	3.6973		6.97771	3.5328		6.70451	3.1998		7.81091	4.3858		7.55011	4.1238		7.32431	3.8943		7.13351	3.6973
92		7.81258	4.38568		7.55178	4.12368		7.32598	3.89418		7.13518	3.69718		6.97938	3.53268		6.70618	3.19968		7.81258	4.38568		7.55178	4.12368		7.32598	3.89418		7.13518	3.69718		6.97938	3.53268		6.70618	3.19968		7.81258	4.38568		7.55178	4.12368		7.32598	3.89418		7.13518	3.69718
93		7.81489	4.386		7.55409	4.124		7.32829	3.8945		7.13749	3.6975		6.98169	3.533		6.70849	3.2		7.81489	4.386		7.55409	4.124		7.32829	3.8945		7.13749	3.6975		6.98169	3.533		6.70849	3.2		7.81489	4.386		7.55409	4.124		7.32829	3.8945		7.13749	3.6975
94		7.81721	4.38631		7.55641	4.12431		7.33061	3.89481		7.13981	3.69781		6.98401	3.53331		6.71081	3.20031		7.81721	4.38631		7.55641	4.12431		7.33061	3.89481		7.13981	3.69781		6.98401	3.53331		6.71081	3.20031		7.81721	4.38631		7.55641	4.12431		7.33061	3.89481		7.13981	3.69781
95		7.81951	4.38662		7.55871	4.12462		7.33291	3.89512		7.14211	3.69812		6.98631	3.53362		6.71311	3.20062		7.81951	4.38662		7.55871	4.12462		7.33291	3.89512		7.14211	3.69812		6.98631	3.53362		6.71311	3.20062		7.81951	4.38662		7.55871	4.12462		7.33291	3.89512		7.14211	3.69812
96		7.82246	4.38736		7.56166	4.12536		7.33586	3.89586		7.14506	3.69886		6.98926	3.53436		6.71606	3.20136		7.82246	4.38736		7.56166	4.12536		7.33586	3.89586		7.14506	3.69886		6.98926	3.53436		6.71606	3.20136		7.82246	4.38736		7.56166	4.12536		7.33586	3.89586		7.14506	3.69886
97		7.82476	4.38767		7.56396	4.12567		7.33816	3.89617		7.14736	3.69917		6.99156	3.53467		6.71836	3.20167		7.82476	4.38767		7.56396	4.12567		7.33816	3.89617		7.14736	3.69917		6.99156	3.53467		6.71836	3.20167		7.82476	4.38767		7.56396	4.12567		7.33816	3.89617		7.14736	3.69917
98		7.82769	4.38841		7.56689	4.12641		7.34109	3.89691		7.15029	3.69991		6.99449	3.53541		6.72129	3.20241		7.82769	4.38841		7.56689	4.12641		7.34109	3.89691		7.15029	3.69991		6.99449	3.53541		6.72129	3.20241		7.82769	4.38841		7.56689	4.12641		7.34109	3.89691		7.15029	3.69991
99		7.82998	4.38871		7.56918	4.12671		7.34338	3.89721		7.15258	3.70021		6.99678	3.53571		6.72358	3.20271		7.82998	4.38871		7.56918	4.12671		7.34338	3.89721		7.15258	3.70021		6.99678	3.53571		6.72358	3.20271		7.82998	4.38871		7.56918	4.12671		7.34338	3.89721		7.15258	3.70021
100		7.8329	4.38944		7.5721	4.12744		7.3463	3.89794		7.1555	3.70094		6.9997	3.53644		6.7265	3.20344		7.8329	4.38944		7.5721	4.12744		7.3463	3.89794		7.1555	3.70094		6.9997	3.53644		6.7265	3.20344		7.8329	4.38944		7.5721	4.12744		7.3463	3.89794		7.1555	3.70094
101		7.83583	4.39017		7.57503	4.12817		7.34923	3.89867		7.15843	3.70167		7.00263	3.53717		6.72943	3.20417		7.83583	4.39017		7.57503	4.12817		7.34923	3.89867		7.15843	3.70167		7.00263	3.53717		6.72943	3.20417		7.83583	4.39017		7.57503	4.12817		7.34923	3.89867		7.15843	3.70167
102		7.83874	4.3909		7.57794	4.1289		7.35214	3.8994		7.16134	3.7024		7.00554	3.5379		6.73234	3.2049		7.83874	4.3909		7.57794	4.1289		7.35214	3.8994		7.16134	3.7024		7.00554	3.5379		6.73234	3.2049		7.83874	4.3909		7.57794	4.1289		7.35214	3.8994		7.16134	3.7024
103		7.84165	4.39163		7.58085	4.12963		7.35505	3.90013		7.16425	3.70313		7.00845	3.53863		6.73525	3.20563		7.84165	4.39163		7.58085	4.12963		7.35505	3.90013		7.16425	3.70313		7.00845	3.53863		6.73525	3.20563		7.84165	4.39163		7.58085	4.12963		7.35505	3.90013		7.16425	3.70313
104		7.84455	4.39236		7.58375	4.13036		7.35795	3.90086		7.16715	3.70386		7.01135	3.53936		6.73815	3.20636		7.84455	4.39236		7.58375	4.13036		7.35795	3.90086		7.16715	3.70386		7.01135	3.53936		6.73815	3.20636		7.84455	4.39236		7.58375	4.13036		7.35795	3.90086		7.16715	3.70386
105		7.84745	4.39308		7.58665	4.13108		7.36085	3.90158		7.17005	3.70458		7.01425	3.54008		6.74105	3.20708		7.84745	4.39308		7.58665	4.13108		7.36085	3.90158		7.17005	3.70458		7.01425	3.54008		6.74105	3.20708		7.84745	4.39308		7.58665	4.13108		7.36085	3.90158		7.17005	3.70458
106		7.85099	4.39423		7.59019	4.13223		7.36439	3.90273		7.17359	3.70573		7.01779	3.54123		6.74459	3.20823		7.85099	4.39423		7.59019	4.13223		7.36439	3.90273		7.17359	3.70573		7.01779	3.54123		6.74459	3.20823		7.85099	4.39423		7.59019	4.13223		7.36439	3.90273		7.17359	3.70573
107		7.85387	4.39495		7.59307	4.13295		7.36727	3.90345		7.17647	3.70645		7.02067	3.54195		6.74747	3.20895		7.85387	4.39495		7.59307	4.13295		7.36727	3.90345		7.17647	3.70645		7.02067	3.54195		6.74747	3.20895		7.85387	4.39495		7.59307	4.13295		7.36727	3.90345		7.17647	3.70645
108		7.8574	4.3961		7.5966	4.1341		7.3708	3.9046		7.18	3.7076		7.0242	3.5431		6.751	3.2101		7.8574	4.3961		7.5966	4.1341		7.3708	3.9046		7.18	3.7076		7.0242	3.5431		6.751	3.2101		7.8574	4.3961		7.5966	4.1341		7.3708	3.9046		7.18	3.7076
109		7.86027	4.39682		7.59947	4.13482		7.37367	3.90532		7.18287	3.70832		7.02707	3.54382		6.75387	3.21082		7.86027	4.39682		7.59947	4.13482		7.37367	3.90532		7.18287	3.70832		7.02707	3.54382		6.75387	3.21082		7.86027	4.39682		7.59947	4.13482		7.37367	3.90532		7.18287	3.70832
110		7.86379	4.39796		7.60299	4.13596		7.37719	3.90646		7.18639	3.70946		7.03059	3.54496		6.75739	3.21196		7.86379	4.39796		7.60299	4.13596		7.37719	3.90646		7.18639	3.70946		7.03059	3.54496		6.75739	3.21196		7.86379	4.39796		7.60299	4.13596		7.37719	3.90646		7.18639	3.70946
111		7.8673	4.3991		7.6065	4.1371		7.3807	3.9076		7.1899	3.7106		7.0341	3.5461		6.7609	3.2131		7.8673	4.3991		7.6065	4.1371		7.3807	3.9076		7.1899	3.7106		7.0341	3.5461		6.7609	3.2131		7.8673	4.3991		7.6065	4.1371		7.3807	3.9076		7.1899	3.7106
112		7.8708	4.40024		7.61	4.13824		7.3842	3.90874		7.1934	3.71174		7.0376	3.54724		6.7644	3.21424		7.8708	4.40024		7.61	4.13824		7.3842	3.90874		7.1934	3.71174		7.0376	3.54724		6.7644	3.21424		7.8708	4.40024		7.61	4.13824		7.3842	3.90874		7.1934	3.71174
113		7.87429	4.40138		7.61349	4.13938		7.38769	3.90988		7.19689	3.71288		7.04109	3.54838		6.76789	3.21538		7.87429	4.40138		7.61349	4.13938		7.38769	3.90988		7.19689	3.71288		7.04109	3.54838		6.76789	3.21538		7.87429	4.40138		7.61349	4.13938		7.38769	3.90988		7.19689	3.71288
114		7.87778	4.40251		7.61698	4.14051		7.39118	3.91101		7.20038	3.71401		7.04458	3.54951		6.77138	3.21651		7.87778	4.40251		7.61698	4.14051		7.39118	3.91101		7.20038	3.71401		7.04458	3.54951		6.77138	3.21651		7.87778	4.40251		7.61698	4.14051		7.39118	3.91101		7.20038	3.71401
115		7.88127	4.40364		7.62047	4.14164		7.39467	3.91214		7.20387	3.71514		7.04807	3.55064		6.77487	3.21764		7.88127	4.40364		7.62047	4.14164		7.39467	3.91214		7.20387	3.71514		7.04807	3.55064		6.77487	3.21764		7.88127	4.40364		7.62047	4.14164		7.39467	3.91214		7.20387	3.71514
116		7.88474	4.40478		7.62394	4.14278		7.39814	3.91328		7.20734	3.71628		7.05154	3.55178		6.77834	3.21878		7.88474	4.40478		7.62394	4.14278		7.39814	3.91328		7.20734	3.71628		7.05154	3.55178		6.77834	3.21878		7.88474	4.40478		7.62394	4.14278		7.39814	3.91328		7.20734	3.71628
117		7.88822	4.40591		7.62742	4.14391		7.40162	3.91441		7.21082	3.71741		7.05502	3.55291		6.78182	3.21991		7.88822	4.40591		7.62742	4.14391		7.40162	3.91441		7.21082	3.71741		7.05502	3.55291		6.78182	3.21991		7.88822	4.40591		7.62742	4.14391		7.40162	3.91441		7.21082	3.71741
118		7.89168	4.40704		7.63088	4.14504		7.40508	3.91554		7.21428	3.71854		7.05848	3.55404		6.78528	3.22104		7.89168	4.40704		7.63088	4.14504		7.40508	3.91554		7.21428	3.71854		7.05848	3.55404		6.78528	3.22104		7.89168	4.40704		7.63088	4.14504		7.40508	3.91554		7.21428	3.71854
119		7.89578	4.40859		7.63498	4.14659		7.40918	3.91709		7.21838	3.72009		7.06258	3.55559		6.78938	3.22259		7.89578	4.40859		7.63498	4.14659		7.40918	3.91709		7.21838	3.72009		7.06258	3.55559		6.78938	3.22259		7.89578	4.40859		7.63498	4.14659		7.40918	3.91709		7.21838	3.72009
120		7.89924	4.40971		7.63844	4.14771		7.41264	3.91821		7.22184	3.72121		7.06604	3.55671		6.79284	3.22371		7.89924	4.40971		7.63844	4.14771		7.41264	3.91821		7.22184	3.72121		7.06604	3.55671		6.79284	3.22371		7.89924	4.40971		7.63844	4.14771		7.41264	3.91821		7.22184	3.72121
EGYH		LAB at 50 km																		LAB at 55 km																		LAB at 60 km
		no melt			melt 0.5%			melt 1%			melt 1.5%			melt 2%			melt 4%			no melt			melt 0.5%			melt 1%			melt 1.5%			melt 2%			melt 4%			no melt			melt 0.5%			melt 1%			melt 1.5%
Depth		Vp	Vs		Vp	Vs		Vp	Vs		Vp	Vs		Vp	Vs		Vp	Vs		Vp	Vs		Vp	Vs		Vp	Vs		Vp	Vs		Vp	Vs		Vp	Vs		Vp	Vs		Vp	Vs		Vp	Vs		Vp	Vs
1		2.17	1.21		2.17	1.21		2.17	1.21		2.17	1.21		2.17	1.21		2.17	1.21		2.17	1.21		2.17	1.21		2.17	1.21		2.17	1.21		2.17	1.21		2.17	1.21		2.17	1.21		2.17	1.21		2.17	1.21		2.17	1.21
2		4.58	2.56		4.58	2.56		4.58	2.56		4.58	2.56		4.58	2.56		4.58	2.56		4.58	2.56		4.58	2.56		4.58	2.56		4.58	2.56		4.58	2.56		4.58	2.56		4.58	2.56		4.58	2.56		4.58	2.56		4.58	2.56
3		5.28819	3.0806		5.28819	3.0806		5.28819	3.0806		5.28819	3.0806		5.28819	3.0806		5.28819	3.0806		5.28819	3.0806		5.28819	3.0806		5.28819	3.0806		5.28819	3.0806		5.28819	3.0806		5.28819	3.0806		5.28819	3.0806		5.28819	3.0806		5.28819	3.0806		5.28819	3.0806
4		5.99637	3.6012		5.99637	3.6012		5.99637	3.6012		5.99637	3.6012		5.99637	3.6012		5.99637	3.6012		5.99637	3.6012		5.99637	3.6012		5.99637	3.6012		5.99637	3.6012		5.99637	3.6012		5.99637	3.6012		5.99637	3.6012		5.99637	3.6012		5.99637	3.6012		5.99637	3.6012
5		6.00808	3.60459		6.00808	3.60459		6.00808	3.60459		6.00808	3.60459		6.00808	3.60459		6.00808	3.60459		6.00808	3.60459		6.00808	3.60459		6.00808	3.60459		6.00808	3.60459		6.00808	3.60459		6.00808	3.60459		6.00808	3.60459		6.00808	3.60459		6.00808	3.60459		6.00808	3.60459
6		6.01979	3.60798		6.01979	3.60798		6.01979	3.60798		6.01979	3.60798		6.01979	3.60798		6.01979	3.60798		6.01979	3.60798		6.01979	3.60798		6.01979	3.60798		6.01979	3.60798		6.01979	3.60798		6.01979	3.60798		6.01979	3.60798		6.01979	3.60798		6.01979	3.60798		6.01979	3.60798
7		6.03149	3.61137		6.03149	3.61137		6.03149	3.61137		6.03149	3.61137		6.03149	3.61137		6.03149	3.61137		6.03149	3.61137		6.03149	3.61137		6.03149	3.61137		6.03149	3.61137		6.03149	3.61137		6.03149	3.61137		6.03149	3.61137		6.03149	3.61137		6.03149	3.61137		6.03149	3.61137
8		6.05653	3.61935		6.05653	3.61935		6.05653	3.61935		6.05653	3.61935		6.05653	3.61935		6.05653	3.61935		6.05653	3.61935		6.05653	3.61935		6.05653	3.61935		6.05653	3.61935		6.05653	3.61935		6.05653	3.61935		6.05653	3.61935		6.05653	3.61935		6.05653	3.61935		6.05653	3.61935
9		6.08157	3.62732		6.08157	3.62732		6.08157	3.62732		6.08157	3.62732		6.08157	3.62732		6.08157	3.62732		6.08157	3.62732		6.08157	3.62732		6.08157	3.62732		6.08157	3.62732		6.08157	3.62732		6.08157	3.62732		6.08157	3.62732		6.08157	3.62732		6.08157	3.62732		6.08157	3.62732
10		6.10661	3.63529		6.10661	3.63529		6.10661	3.63529		6.10661	3.63529		6.10661	3.63529		6.10661	3.63529		6.10661	3.63529		6.10661	3.63529		6.10661	3.63529		6.10661	3.63529		6.10661	3.63529		6.10661	3.63529		6.10661	3.63529		6.10661	3.63529		6.10661	3.63529		6.10661	3.63529
11		6.16803	3.65248		6.16803	3.65248		6.16803	3.65248		6.16803	3.65248		6.16803	3.65248		6.16803	3.65248		6.16803	3.65248		6.16803	3.65248		6.16803	3.65248		6.16803	3.65248		6.16803	3.65248		6.16803	3.65248		6.16803	3.65248		6.16803	3.65248		6.16803	3.65248		6.16803	3.65248
12		6.22944	3.66966		6.22944	3.66966		6.22944	3.66966		6.22944	3.66966		6.22944	3.66966		6.22944	3.66966		6.22944	3.66966		6.22944	3.66966		6.22944	3.66966		6.22944	3.66966		6.22944	3.66966		6.22944	3.66966		6.22944	3.66966		6.22944	3.66966		6.22944	3.66966		6.22944	3.66966
13		6.29085	3.68684		6.29085	3.68684		6.29085	3.68684		6.29085	3.68684		6.29085	3.68684		6.29085	3.68684		6.29085	3.68684		6.29085	3.68684		6.29085	3.68684		6.29085	3.68684		6.29085	3.68684		6.29085	3.68684		6.29085	3.68684		6.29085	3.68684		6.29085	3.68684		6.29085	3.68684
14		6.35227	3.70402		6.35227	3.70402		6.35227	3.70402		6.35227	3.70402		6.35227	3.70402		6.35227	3.70402		6.35227	3.70402		6.35227	3.70402		6.35227	3.70402		6.35227	3.70402		6.35227	3.70402		6.35227	3.70402		6.35227	3.70402		6.35227	3.70402		6.35227	3.70402		6.35227	3.70402
15		6.45236	3.73053		6.45236	3.73053		6.45236	3.73053		6.45236	3.73053		6.45236	3.73053		6.45236	3.73053		6.45236	3.73053		6.45236	3.73053		6.45236	3.73053		6.45236	3.73053		6.45236	3.73053		6.45236	3.73053		6.45236	3.73053		6.45236	3.73053		6.45236	3.73053		6.45236	3.73053
16		6.55245	3.75704		6.55245	3.75704		6.55245	3.75704		6.55245	3.75704		6.55245	3.75704		6.55245	3.75704		6.55245	3.75704		6.55245	3.75704		6.55245	3.75704		6.55245	3.75704		6.55245	3.75704		6.55245	3.75704		6.55245	3.75704		6.55245	3.75704		6.55245	3.75704		6.55245	3.75704
17		6.65254	3.78355		6.65254	3.78355		6.65254	3.78355		6.65254	3.78355		6.65254	3.78355		6.65254	3.78355		6.65254	3.78355		6.65254	3.78355		6.65254	3.78355		6.65254	3.78355		6.65254	3.78355		6.65254	3.78355		6.65254	3.78355		6.65254	3.78355		6.65254	3.78355		6.65254	3.78355
18		6.75263	3.81006		6.75263	3.81006		6.75263	3.81006		6.75263	3.81006		6.75263	3.81006		6.75263	3.81006		6.75263	3.81006		6.75263	3.81006		6.75263	3.81006		6.75263	3.81006		6.75263	3.81006		6.75263	3.81006		6.75263	3.81006		6.75263	3.81006		6.75263	3.81006		6.75263	3.81006
19		6.86027	3.86083		6.86027	3.86083		6.86027	3.86083		6.86027	3.86083		6.86027	3.86083		6.86027	3.86083		6.86027	3.86083		6.86027	3.86083		6.86027	3.86083		6.86027	3.86083		6.86027	3.86083		6.86027	3.86083		6.86027	3.86083		6.86027	3.86083		6.86027	3.86083		6.86027	3.86083
20		6.96791	3.9116		6.96791	3.9116		6.96791	3.9116		6.96791	3.9116		6.96791	3.9116		6.96791	3.9116		6.96791	3.9116		6.96791	3.9116		6.96791	3.9116		6.96791	3.9116		6.96791	3.9116		6.96791	3.9116		6.96791	3.9116		6.96791	3.9116		6.96791	3.9116		6.96791	3.9116
21		7.07554	3.96237		7.07554	3.96237		7.07554	3.96237		7.07554	3.96237		7.07554	3.96237		7.07554	3.96237		7.07554	3.96237		7.07554	3.96237		7.07554	3.96237		7.07554	3.96237		7.07554	3.96237		7.07554	3.96237		7.07554	3.96237		7.07554	3.96237		7.07554	3.96237		7.07554	3.96237
22		7.18318	4.01314		7.18318	4.01314		7.18318	4.01314		7.18318	4.01314		7.18318	4.01314		7.18318	4.01314		7.18318	4.01314		7.18318	4.01314		7.18318	4.01314		7.18318	4.01314		7.18318	4.01314		7.18318	4.01314		7.18318	4.01314		7.18318	4.01314		7.18318	4.01314		7.18318	4.01314
23		7.29081	4.06391		7.29081	4.06391		7.29081	4.06391		7.29081	4.06391		7.29081	4.06391		7.29081	4.06391		7.29081	4.06391		7.29081	4.06391		7.29081	4.06391		7.29081	4.06391		7.29081	4.06391		7.29081	4.06391		7.29081	4.06391		7.29081	4.06391		7.29081	4.06391		7.29081	4.06391
24		7.40131	4.13051		7.40131	4.13051		7.40131	4.13051		7.40131	4.13051		7.40131	4.13051		7.40131	4.13051		7.40131	4.13051		7.40131	4.13051		7.40131	4.13051		7.40131	4.13051		7.40131	4.13051		7.40131	4.13051		7.40131	4.13051		7.40131	4.13051		7.40131	4.13051		7.40131	4.13051
25		7.51181	4.1971		7.51181	4.1971		7.51181	4.1971		7.51181	4.1971		7.51181	4.1971		7.51181	4.1971		7.51181	4.1971		7.51181	4.1971		7.51181	4.1971		7.51181	4.1971		7.51181	4.1971		7.51181	4.1971		7.51181	4.1971		7.51181	4.1971		7.51181	4.1971		7.51181	4.1971
26		7.62231	4.26369		7.62231	4.26369		7.62231	4.26369		7.62231	4.26369		7.62231	4.26369		7.62231	4.26369		7.62231	4.26369		7.62231	4.26369		7.62231	4.26369		7.62231	4.26369		7.62231	4.26369		7.62231	4.26369		7.62231	4.26369		7.62231	4.26369		7.62231	4.26369		7.62231	4.26369
27		8.05032	4.6294		8.05032	4.6294		8.05032	4.6294		8.05032	4.6294		8.05032	4.6294		8.05032	4.6294		8.05032	4.6294		8.05032	4.6294		8.05032	4.6294		8.05032	4.6294		8.05032	4.6294		8.05032	4.6294		8.05032	4.6294		8.05032	4.6294		8.05032	4.6294		8.05032	4.6294
28		8.04482	4.62439		8.04482	4.62439		8.04482	4.62439		8.04482	4.62439		8.04482	4.62439		8.04482	4.62439		8.04482	4.62439		8.04482	4.62439		8.04482	4.62439		8.04482	4.62439		8.04482	4.62439		8.04482	4.62439		8.04482	4.62439		8.04482	4.62439		8.04482	4.62439		8.04482	4.62439
29		8.03867	4.61896		8.03867	4.61896		8.03867	4.61896		8.03867	4.61896		8.03867	4.61896		8.03867	4.61896		8.03867	4.61896		8.03867	4.61896		8.03867	4.61896		8.03867	4.61896		8.03867	4.61896		8.03867	4.61896		8.03867	4.61896		8.03867	4.61896		8.03867	4.61896		8.03867	4.61896
30		8.0331	4.61391		8.0331	4.61391		8.0331	4.61391		8.0331	4.61391		8.0331	4.61391		8.0331	4.61391		8.0331	4.61391		8.0331	4.61391		8.0331	4.61391		8.0331	4.61391		8.0331	4.61391		8.0331	4.61391		8.0331	4.61391		8.0331	4.61391		8.0331	4.61391		8.0331	4.61391
31		8.02687	4.60843		8.02687	4.60843		8.02687	4.60843		8.02687	4.60843		8.02687	4.60843		8.02687	4.60843		8.02687	4.60843		8.02687	4.60843		8.02687	4.60843		8.02687	4.60843		8.02687	4.60843		8.02687	4.60843		8.02687	4.60843		8.02687	4.60843		8.02687	4.60843		8.02687	4.60843
32		8.02123	4.60335		8.02123	4.60335		8.02123	4.60335		8.02123	4.60335		8.02123	4.60335		8.02123	4.60335		8.02123	4.60335		8.02123	4.60335		8.02123	4.60335		8.02123	4.60335		8.02123	4.60335		8.02123	4.60335		8.02123	4.60335		8.02123	4.60335		8.02123	4.60335		8.02123	4.60335
33		8.01556	4.59825		8.01556	4.59825		8.01556	4.59825		8.01556	4.59825		8.01556	4.59825		8.01556	4.59825		8.01556	4.59825		8.01556	4.59825		8.01556	4.59825		8.01556	4.59825		8.01556	4.59825		8.01556	4.59825		8.01556	4.59825		8.01556	4.59825		8.01556	4.59825		8.01556	4.59825
34		8.00986	4.59314		8.00986	4.59314		8.00986	4.59314		8.00986	4.59314		8.00986	4.59314		8.00986	4.59314		8.00986	4.59314		8.00986	4.59314		8.00986	4.59314		8.00986	4.59314		8.00986	4.59314		8.00986	4.59314		8.00986	4.59314		8.00986	4.59314		8.00986	4.59314		8.00986	4.59314
35		8.00476	4.58843		8.00476	4.58843		8.00476	4.58843		8.00476	4.58843		8.00476	4.58843		8.00476	4.58843		8.00476	4.58843		8.00476	4.58843		8.00476	4.58843		8.00476	4.58843		8.00476	4.58843		8.00476	4.58843		8.00476	4.58843		8.00476	4.58843		8.00476	4.58843		8.00476	4.58843
36		7.99901	4.58329		7.99901	4.58329		7.99901	4.58329		7.99901	4.58329		7.99901	4.58329		7.99901	4.58329		7.99901	4.58329		7.99901	4.58329		7.99901	4.58329		7.99901	4.58329		7.99901	4.58329		7.99901	4.58329		7.99901	4.58329		7.99901	4.58329		7.99901	4.58329		7.99901	4.58329
37		7.99387	4.57855		7.99387	4.57855		7.99387	4.57855		7.99387	4.57855		7.99387	4.57855		7.99387	4.57855		7.99387	4.57855		7.99387	4.57855		7.99387	4.57855		7.99387	4.57855		7.99387	4.57855		7.99387	4.57855		7.99387	4.57855		7.99387	4.57855		7.99387	4.57855		7.99387	4.57855
38		7.98871	4.57381		7.98871	4.57381		7.98871	4.57381		7.98871	4.57381		7.98871	4.57381		7.98871	4.57381		7.98871	4.57381		7.98871	4.57381		7.98871	4.57381		7.98871	4.57381		7.98871	4.57381		7.98871	4.57381		7.98871	4.57381		7.98871	4.57381		7.98871	4.57381		7.98871	4.57381
39		7.98352	4.56905		7.98352	4.56905		7.98352	4.56905		7.98352	4.56905		7.98352	4.56905		7.98352	4.56905		7.98352	4.56905		7.98352	4.56905		7.98352	4.56905		7.98352	4.56905		7.98352	4.56905		7.98352	4.56905		7.98352	4.56905		7.98352	4.56905		7.98352	4.56905		7.98352	4.56905
40		7.97832	4.56429		7.97832	4.56429		7.97832	4.56429		7.97832	4.56429		7.97832	4.56429		7.97832	4.56429		7.97832	4.56429		7.97832	4.56429		7.97832	4.56429		7.97832	4.56429		7.97832	4.56429		7.97832	4.56429		7.97832	4.56429		7.97832	4.56429		7.97832	4.56429		7.97832	4.56429
41		7.97212	4.55889		7.97212	4.55889		7.97212	4.55889		7.97212	4.55889		7.97212	4.55889		7.97212	4.55889		7.97374	4.55994		7.97374	4.55994		7.97374	4.55994		7.97374	4.55994		7.97374	4.55994		7.97374	4.55994		7.97374	4.55994		7.97374	4.55994		7.97374	4.55994		7.97374	4.55994
42		7.9647	4.55271		7.9647	4.55271		7.9647	4.55271		7.9647	4.55271		7.9647	4.55271		7.9647	4.55271		7.96849	4.55516		7.96849	4.55516		7.96849	4.55516		7.96849	4.55516		7.96849	4.55516		7.96849	4.55516		7.96849	4.55516		7.96849	4.55516		7.96849	4.55516		7.96849	4.55516
43		7.95716	4.54646		7.95716	4.54646		7.95716	4.54646		7.95716	4.54646		7.95716	4.54646		7.95716	4.54646		7.96388	4.55079		7.96388	4.55079		7.96388	4.55079		7.96388	4.55079		7.96388	4.55079		7.96388	4.55079		7.96388	4.55079		7.96388	4.55079		7.96388	4.55079		7.96388	4.55079
44		7.9486	4.53955		7.9486	4.53955		7.9486	4.53955		7.9486	4.53955		7.9486	4.53955		7.9486	4.53955		7.95925	4.54642		7.95925	4.54642		7.95925	4.54642		7.95925	4.54642		7.95925	4.54642		7.95925	4.54642		7.95925	4.54642		7.95925	4.54642		7.95925	4.54642		7.95925	4.54642
45		7.93867	4.53176		7.93867	4.53176		7.93867	4.53176		7.93867	4.53176		7.93867	4.53176		7.93867	4.53176		7.95461	4.54204		7.95461	4.54204		7.95461	4.54204		7.95461	4.54204		7.95461	4.54204		7.95461	4.54204		7.95461	4.54204		7.95461	4.54204		7.95461	4.54204		7.95461	4.54204
46		7.92691	4.5228		7.92691	4.5228		7.92691	4.5228		7.92691	4.5228		7.92691	4.5228		7.92691	4.5228		7.94835	4.53662		7.94835	4.53662		7.94835	4.53662		7.94835	4.53662		7.94835	4.53662		7.94835	4.53662		7.94995	4.53766		7.94995	4.53766		7.94995	4.53766		7.94995	4.53766
47		7.91269	4.51225		7.91269	4.51225		7.91269	4.51225		7.91269	4.51225		7.91269	4.51225		7.91269	4.51225		7.94153	4.53085		7.94153	4.53085		7.94153	4.53085		7.94153	4.53085		7.94153	4.53085		7.94153	4.53085		7.94529	4.53326		7.94529	4.53326		7.94529	4.53326		7.94529	4.53326
48		7.89582	4.5		7.89582	4.5		7.89582	4.5		7.89582	4.5		7.89582	4.5		7.89582	4.5		7.9346	4.52501		7.9346	4.52501		7.9346	4.52501		7.9346	4.52501		7.9346	4.52501		7.9346	4.52501		7.94125	4.5293		7.94125	4.5293		7.94125	4.5293		7.94125	4.5293
49		7.87453	4.48491		7.87453	4.48491		7.87453	4.48491		7.87453	4.48491		7.87453	4.48491		7.87453	4.48491		7.92667	4.51853		7.92667	4.51853		7.92667	4.51853		7.92667	4.51853		7.92667	4.51853		7.92667	4.51853		7.93721	4.52533		7.93721	4.52533		7.93721	4.52533		7.93721	4.52533
50		7.8467	4.4656		7.8467	4.4656		7.8467	4.4656		7.8467	4.4656		7.8467	4.4656		7.8467	4.4656		7.91673	4.51076		7.91673	4.51076		7.91673	4.51076		7.91673	4.51076		7.91673	4.51076		7.91673	4.51076		7.93251	4.52092		7.93251	4.52092		7.93251	4.52092		7.93251	4.52092
51		7.93305	4.51995		7.67225	4.25795		7.44645	4.02845		7.25565	3.83145		7.09985	3.66695		6.82665	3.33395		7.90563	4.50224		7.90563	4.50224		7.90563	4.50224		7.90563	4.50224		7.90563	4.50224		7.90563	4.50224		7.92686	4.51592		7.92686	4.51592		7.92686	4.51592		7.92686	4.51592
52		7.92962	4.51639		7.66882	4.25439		7.44302	4.02489		7.25222	3.82789		7.09642	3.66339		6.82322	3.33039		7.89274	4.49259		7.89274	4.49259		7.89274	4.49259		7.89274	4.49259		7.89274	4.49259		7.89274	4.49259		7.9213	4.51099		7.9213	4.51099		7.9213	4.51099		7.9213	4.51099
53		7.92553	4.51239		7.66473	4.25039		7.43893	4.02089		7.24813	3.82389		7.09233	3.65939		6.81913	3.32639		7.87594	4.48041		7.87594	4.48041		7.87594	4.48041		7.87594	4.48041		7.87594	4.48041		7.87594	4.48041		7.91435	4.50516		7.91435	4.50516		7.91435	4.50516		7.91435	4.50516
54		7.92143	4.50839		7.66063	4.24639		7.43483	4.01689		7.24403	3.81989		7.08823	3.65539		6.81503	3.32239		7.85477	4.46542		7.85477	4.46542		7.85477	4.46542		7.85477	4.46542		7.85477	4.46542		7.85477	4.46542		7.90641	4.49868		7.90641	4.49868		7.90641	4.49868		7.90641	4.49868
55		7.91797	4.50482		7.65717	4.24282		7.43137	4.01332		7.24057	3.81632		7.08477	3.65182		6.81157	3.31882		7.82838	4.44707		7.82838	4.44707		7.82838	4.44707		7.82838	4.44707		7.82838	4.44707		7.82838	4.44707		7.89777	4.49178		7.89777	4.49178		7.89777	4.49178		7.89777	4.49178
56		7.91451	4.50125		7.65371	4.23925		7.42791	4.00975		7.23711	3.81275		7.08131	3.64825		6.80811	3.31525		7.91451	4.50125		7.65371	4.23925		7.42791	4.00975		7.23711	3.81275		7.08131	3.64825		6.80811	3.31525		7.88734	4.48372		7.88734	4.48372		7.88734	4.48372		7.88734	4.48372
57		7.91104	4.49768		7.65024	4.23568		7.42444	4.00618		7.23364	3.80918		7.07784	3.64468		6.80464	3.31168		7.91104	4.49768		7.65024	4.23568		7.42444	4.00618		7.23364	3.80918		7.07784	3.64468		6.80464	3.31168		7.87449	4.47412		7.87449	4.47412		7.87449	4.47412		7.87449	4.47412
58		7.90757	4.4941		7.64677	4.2321		7.42097	4.0026		7.23017	3.8056		7.07437	3.6411		6.80117	3.3081		7.90757	4.4941		7.64677	4.2321		7.42097	4.0026		7.23017	3.8056		7.07437	3.6411		6.80117	3.3081		7.85841	4.46243		7.85841	4.46243		7.85841	4.46243		7.85841	4.46243
59		7.90409	4.49052		7.64329	4.22852		7.41749	3.99902		7.22669	3.80202		7.07089	3.63752		6.79769	3.30452		7.90409	4.49052		7.64329	4.22852		7.41749	3.99902		7.22669	3.80202		7.07089	3.63752		6.79769	3.30452		7.83798	4.44795		7.83798	4.44795		7.83798	4.44795		7.83798	4.44795
60		7.9006	4.48694		7.6398	4.22494		7.414	3.99544		7.2232	3.79844		7.0674	3.63394		6.7942	3.30094		7.9006	4.48694		7.6398	4.22494		7.414	3.99544		7.2232	3.79844		7.0674	3.63394		6.7942	3.30094		7.81175	4.42973		7.81175	4.42973		7.81175	4.42973		7.81175	4.42973
61		7.89776	4.48379		7.63696	4.22179		7.41116	3.99229		7.22036	3.79529		7.06456	3.63079		6.79136	3.29779		7.89776	4.48379		7.63696	4.22179		7.41116	3.99229		7.22036	3.79529		7.06456	3.63079		6.79136	3.29779		7.89776	4.48379		7.63696	4.22179		7.41116	3.99229		7.22036	3.79529
62		7.89492	4.48064		7.63412	4.21864		7.40832	3.98914		7.21752	3.79214		7.06172	3.62764		6.78852	3.29464		7.89492	4.48064		7.63412	4.21864		7.40832	3.98914		7.21752	3.79214		7.06172	3.62764		6.78852	3.29464		7.89492	4.48064		7.63412	4.21864		7.40832	3.98914		7.21752	3.79214
63		7.89142	4.47706		7.63062	4.21506		7.40482	3.98556		7.21402	3.78856		7.05822	3.62406		6.78502	3.29106		7.89142	4.47706		7.63062	4.21506		7.40482	3.98556		7.21402	3.78856		7.05822	3.62406		6.78502	3.29106		7.89142	4.47706		7.63062	4.21506		7.40482	3.98556		7.21402	3.78856
64		7.88856	4.4739		7.62776	4.2119		7.40196	3.9824		7.21116	3.7854		7.05536	3.6209		6.78216	3.2879		7.88856	4.4739		7.62776	4.2119		7.40196	3.9824		7.21116	3.7854		7.05536	3.6209		6.78216	3.2879		7.88856	4.4739		7.62776	4.2119		7.40196	3.9824		7.21116	3.7854
65		7.88636	4.47118		7.62556	4.20918		7.39976	3.97968		7.20896	3.78268		7.05316	3.61818		6.77996	3.28518		7.88636	4.47118		7.62556	4.20918		7.39976	3.97968		7.20896	3.78268		7.05316	3.61818		6.77996	3.28518		7.88636	4.47118		7.62556	4.20918		7.39976	3.97968		7.20896	3.78268
66		7.8835	4.46803		7.6227	4.20603		7.3969	3.97653		7.2061	3.77953		7.0503	3.61503		6.7771	3.28203		7.8835	4.46803		7.6227	4.20603		7.3969	3.97653		7.2061	3.77953		7.0503	3.61503		6.7771	3.28203		7.8835	4.46803		7.6227	4.20603		7.3969	3.97653		7.2061	3.77953
67		7.88063	4.46487		7.61983	4.20287		7.39403	3.97337		7.20323	3.77637		7.04743	3.61187		6.77423	3.27887		7.88063	4.46487		7.61983	4.20287		7.39403	3.97337		7.20323	3.77637		7.04743	3.61187		6.77423	3.27887		7.88063	4.46487		7.61983	4.20287		7.39403	3.97337		7.20323	3.77637
68		7.87842	4.46215		7.61762	4.20015		7.39182	3.97065		7.20102	3.77365		7.04522	3.60915		6.77202	3.27615		7.87842	4.46215		7.61762	4.20015		7.39182	3.97065		7.20102	3.77365		7.04522	3.60915		6.77202	3.27615		7.87842	4.46215		7.61762	4.20015		7.39182	3.97065		7.20102	3.77365
69		7.8762	4.45942		7.6154	4.19742		7.3896	3.96792		7.1988	3.77092		7.043	3.60642		6.7698	3.27342		7.8762	4.45942		7.6154	4.19742		7.3896	3.96792		7.1988	3.77092		7.043	3.60642		6.7698	3.27342		7.8762	4.45942		7.6154	4.19742		7.3896	3.96792		7.1988	3.77092
70		7.87397	4.4567		7.61317	4.1947		7.38737	3.9652		7.19657	3.7682		7.04077	3.6037		6.76757	3.2707		7.87397	4.4567		7.61317	4.1947		7.38737	3.9652		7.19657	3.7682		7.04077	3.6037		6.76757	3.2707		7.87397	4.4567		7.61317	4.1947		7.38737	3.9652		7.19657	3.7682
71		7.87175	4.45397		7.61095	4.19197		7.38515	3.96247		7.19435	3.76547		7.03855	3.60097		6.76535	3.26797		7.87175	4.45397		7.61095	4.19197		7.38515	3.96247		7.19435	3.76547		7.03855	3.60097		6.76535	3.26797		7.87175	4.45397		7.61095	4.19197		7.38515	3.96247		7.19435	3.76547
72		7.86952	4.45125		7.60872	4.18925		7.38292	3.95975		7.19212	3.76275		7.03632	3.59825		6.76312	3.26525		7.86952	4.45125		7.60872	4.18925		7.38292	3.95975		7.19212	3.76275		7.03632	3.59825		6.76312	3.26525		7.86952	4.45125		7.60872	4.18925		7.38292	3.95975		7.19212	3.76275
73		7.86728	4.44852		7.60648	4.18652		7.38068	3.95702		7.18988	3.76002		7.03408	3.59552		6.76088	3.26252		7.86728	4.44852		7.60648	4.18652		7.38068	3.95702		7.18988	3.76002		7.03408	3.59552		6.76088	3.26252		7.86728	4.44852		7.60648	4.18652		7.38068	3.95702		7.18988	3.76002
74		7.8657	4.44622		7.6049	4.18422		7.3791	3.95472		7.1883	3.75772		7.0325	3.59322		6.7593	3.26022		7.8657	4.44622		7.6049	4.18422		7.3791	3.95472		7.1883	3.75772		7.0325	3.59322		6.7593	3.26022		7.8657	4.44622		7.6049	4.18422		7.3791	3.95472		7.1883	3.75772
75		7.86346	4.4435		7.60266	4.1815		7.37686	3.952		7.18606	3.755		7.03026	3.5905		6.75706	3.2575		7.86346	4.4435		7.60266	4.1815		7.37686	3.952		7.18606	3.755		7.03026	3.5905		6.75706	3.2575		7.86346	4.4435		7.60266	4.1815		7.37686	3.952		7.18606	3.755
76		7.86187	4.4412		7.60107	4.1792		7.37527	3.9497		7.18447	3.7527		7.02867	3.5882		6.75547	3.2552		7.86187	4.4412		7.60107	4.1792		7.37527	3.9497		7.18447	3.7527		7.02867	3.5882		6.75547	3.2552		7.86187	4.4412		7.60107	4.1792		7.37527	3.9497		7.18447	3.7527
77		7.86028	4.43891		7.59948	4.17691		7.37368	3.94741		7.18288	3.75041		7.02708	3.58591		6.75388	3.25291		7.86028	4.43891		7.59948	4.17691		7.37368	3.94741		7.18288	3.75041		7.02708	3.58591		6.75388	3.25291		7.86028	4.43891		7.59948	4.17691		7.37368	3.94741		7.18288	3.75041
78		7.85868	4.43661		7.59788	4.17461		7.37208	3.94511		7.18128	3.74811		7.02548	3.58361		6.75228	3.25061		7.85868	4.43661		7.59788	4.17461		7.37208	3.94511		7.18128	3.74811		7.02548	3.58361		6.75228	3.25061		7.85868	4.43661		7.59788	4.17461		7.37208	3.94511		7.18128	3.74811
79		7.85708	4.43432		7.59628	4.17232		7.37048	3.94282		7.17968	3.74582		7.02388	3.58132		6.75068	3.24832		7.85708	4.43432		7.59628	4.17232		7.37048	3.94282		7.17968	3.74582		7.02388	3.58132		6.75068	3.24832		7.85708	4.43432		7.59628	4.17232		7.37048	3.94282		7.17968	3.74582
80		7.85614	4.43245		7.59534	4.17045		7.36954	3.94095		7.17874	3.74395		7.02294	3.57945		6.74974	3.24645		7.85614	4.43245		7.59534	4.17045		7.36954	3.94095		7.17874	3.74395		7.02294	3.57945		6.74974	3.24645		7.85614	4.43245		7.59534	4.17045		7.36954	3.94095		7.17874	3.74395
81		7.86991	4.4359		7.60911	4.1739		7.38331	3.9444		7.19251	3.7474		7.03671	3.5829		6.76351	3.2499		7.86991	4.4359		7.60911	4.1739		7.38331	3.9444		7.19251	3.7474		7.03671	3.5829		6.76351	3.2499		7.86991	4.4359		7.60911	4.1739		7.38331	3.9444		7.19251	3.7474
82		7.869	4.43407		7.6082	4.17207		7.3824	3.94257		7.1916	3.74557		7.0358	3.58107		6.7626	3.24807		7.869	4.43407		7.6082	4.17207		7.3824	3.94257		7.1916	3.74557		7.0358	3.58107		6.7626	3.24807		7.869	4.43407		7.6082	4.17207		7.3824	3.94257		7.1916	3.74557
83		7.86809	4.43224		7.60729	4.17024		7.38149	3.94074		7.19069	3.74374		7.03489	3.57924		6.76169	3.24624		7.86809	4.43224		7.60729	4.17024		7.38149	3.94074		7.19069	3.74374		7.03489	3.57924		6.76169	3.24624		7.86809	4.43224		7.60729	4.17024		7.38149	3.94074		7.19069	3.74374
84		7.86717	4.43041		7.60637	4.16841		7.38057	3.93891		7.18977	3.74191		7.03397	3.57741		6.76077	3.24441		7.86717	4.43041		7.60637	4.16841		7.38057	3.93891		7.18977	3.74191		7.03397	3.57741		6.76077	3.24441		7.86717	4.43041		7.60637	4.16841		7.38057	3.93891		7.18977	3.74191
85		7.86626	4.42858		7.60546	4.16658		7.37966	3.93708		7.18886	3.74008		7.03306	3.57558		6.75986	3.24258		7.86626	4.42858		7.60546	4.16658		7.37966	3.93708		7.18886	3.74008		7.03306	3.57558		6.75986	3.24258		7.86626	4.42858		7.60546	4.16658		7.37966	3.93708		7.18886	3.74008
86		7.86598	4.42718		7.60518	4.16518		7.37938	3.93568		7.18858	3.73868		7.03278	3.57418		6.75958	3.24118		7.86598	4.42718		7.60518	4.16518		7.37938	3.93568		7.18858	3.73868		7.03278	3.57418		6.75958	3.24118		7.86598	4.42718		7.60518	4.16518		7.37938	3.93568		7.18858	3.73868
87		7.86506	4.42535		7.60426	4.16335		7.37846	3.93385		7.18766	3.73685		7.03186	3.57235		6.75866	3.23935		7.86506	4.42535		7.60426	4.16335		7.37846	3.93385		7.18766	3.73685		7.03186	3.57235		6.75866	3.23935		7.86506	4.42535		7.60426	4.16335		7.37846	3.93385		7.18766	3.73685
88		7.86478	4.42394		7.60398	4.16194		7.37818	3.93244		7.18738	3.73544		7.03158	3.57094		6.75838	3.23794		7.86478	4.42394		7.60398	4.16194		7.37818	3.93244		7.18738	3.73544		7.03158	3.57094		6.75838	3.23794		7.86478	4.42394		7.60398	4.16194		7.37818	3.93244		7.18738	3.73544
89		7.8645	4.42254		7.6037	4.16054		7.3779	3.93104		7.1871	3.73404		7.0313	3.56954		6.7581	3.23654		7.8645	4.42254		7.6037	4.16054		7.3779	3.93104		7.1871	3.73404		7.0313	3.56954		6.7581	3.23654		7.8645	4.42254		7.6037	4.16054		7.3779	3.93104		7.1871	3.73404
90		7.86421	4.42113		7.60341	4.15913		7.37761	3.92963		7.18681	3.73263		7.03101	3.56813		6.75781	3.23513		7.86421	4.42113		7.60341	4.15913		7.37761	3.92963		7.18681	3.73263		7.03101	3.56813		6.75781	3.23513		7.86421	4.42113		7.60341	4.15913		7.37761	3.92963		7.18681	3.73263
91		7.86392	4.41973		7.60312	4.15773		7.37732	3.92823		7.18652	3.73123		7.03072	3.56673		6.75752	3.23373		7.86392	4.41973		7.60312	4.15773		7.37732	3.92823		7.18652	3.73123		7.03072	3.56673		6.75752	3.23373		7.86392	4.41973		7.60312	4.15773		7.37732	3.92823		7.18652	3.73123
92		7.86362	4.41832		7.60282	4.15632		7.37702	3.92682		7.18622	3.72982		7.03042	3.56532		6.75722	3.23232		7.86362	4.41832		7.60282	4.15632		7.37702	3.92682		7.18622	3.72982		7.03042	3.56532		6.75722	3.23232		7.86362	4.41832		7.60282	4.15632		7.37702	3.92682		7.18622	3.72982
93		7.86333	4.41692		7.60253	4.15492		7.37673	3.92542		7.18593	3.72842		7.03013	3.56392		6.75693	3.23092		7.86333	4.41692		7.60253	4.15492		7.37673	3.92542		7.18593	3.72842		7.03013	3.56392		6.75693	3.23092		7.86333	4.41692		7.60253	4.15492		7.37673	3.92542		7.18593	3.72842
94		7.86367	4.41594		7.60287	4.15394		7.37707	3.92444		7.18627	3.72744		7.03047	3.56294		6.75727	3.22994		7.86367	4.41594		7.60287	4.15394		7.37707	3.92444		7.18627	3.72744		7.03047	3.56294		6.75727	3.22994		7.86367	4.41594		7.60287	4.15394		7.37707	3.92444		7.18627	3.72744
95		7.86402	4.41496		7.60322	4.15296		7.37742	3.92346		7.18662	3.72646		7.03082	3.56196		6.75762	3.22896		7.86402	4.41496		7.60322	4.15296		7.37742	3.92346		7.18662	3.72646		7.03082	3.56196		6.75762	3.22896		7.86402	4.41496		7.60322	4.15296		7.37742	3.92346		7.18662	3.72646
96		7.86436	4.41398		7.60356	4.15198		7.37776	3.92248		7.18696	3.72548		7.03116	3.56098		6.75796	3.22798		7.86436	4.41398		7.60356	4.15198		7.37776	3.92248		7.18696	3.72548		7.03116	3.56098		6.75796	3.22798		7.86436	4.41398		7.60356	4.15198		7.37776	3.92248		7.18696	3.72548
97		7.86469	4.413		7.60389	4.151		7.37809	3.9215		7.18729	3.7245		7.03149	3.56		6.75829	3.227		7.86469	4.413		7.60389	4.151		7.37809	3.9215		7.18729	3.7245		7.03149	3.56		6.75829	3.227		7.86469	4.413		7.60389	4.151		7.37809	3.9215		7.18729	3.7245
98		7.86502	4.41202		7.60422	4.15002		7.37842	3.92052		7.18762	3.72352		7.03182	3.55902		6.75862	3.22602		7.86502	4.41202		7.60422	4.15002		7.37842	3.92052		7.18762	3.72352		7.03182	3.55902		6.75862	3.22602		7.86502	4.41202		7.60422	4.15002		7.37842	3.92052		7.18762	3.72352
99		7.866	4.41146		7.6052	4.14946		7.3794	3.91996		7.1886	3.72296		7.0328	3.55846		6.7596	3.22546		7.866	4.41146		7.6052	4.14946		7.3794	3.91996		7.1886	3.72296		7.0328	3.55846		6.7596	3.22546		7.866	4.41146		7.6052	4.14946		7.3794	3.91996		7.1886	3.72296
100		7.86632	4.41048		7.60552	4.14848		7.37972	3.91898		7.18892	3.72198		7.03312	3.55748		6.75992	3.22448		7.86632	4.41048		7.60552	4.14848		7.37972	3.91898		7.18892	3.72198		7.03312	3.55748		6.75992	3.22448		7.86632	4.41048		7.60552	4.14848		7.37972	3.91898		7.18892	3.72198
101		7.86729	4.40993		7.60649	4.14793		7.38069	3.91843		7.18989	3.72143		7.03409	3.55693		6.76089	3.22393		7.86729	4.40993		7.60649	4.14793		7.38069	3.91843		7.18989	3.72143		7.03409	3.55693		6.76089	3.22393		7.86729	4.40993		7.60649	4.14793		7.38069	3.91843		7.18989	3.72143
102		7.86825	4.40937		7.60745	4.14737		7.38165	3.91787		7.19085	3.72087		7.03505	3.55637		6.76185	3.22337		7.86825	4.40937		7.60745	4.14737		7.38165	3.91787		7.19085	3.72087		7.03505	3.55637		6.76185	3.22337		7.86825	4.40937		7.60745	4.14737		7.38165	3.91787		7.19085	3.72087
103		7.86921	4.40881		7.60841	4.14681		7.38261	3.91731		7.19181	3.72031		7.03601	3.55581		6.76281	3.22281		7.86921	4.40881		7.60841	4.14681		7.38261	3.91731		7.19181	3.72031		7.03601	3.55581		6.76281	3.22281		7.86921	4.40881		7.60841	4.14681		7.38261	3.91731		7.19181	3.72031
104		7.87016	4.40825		7.60936	4.14625		7.38356	3.91675		7.19276	3.71975		7.03696	3.55525		6.76376	3.22225		7.87016	4.40825		7.60936	4.14625		7.38356	3.91675		7.19276	3.71975		7.03696	3.55525		6.76376	3.22225		7.87016	4.40825		7.60936	4.14625		7.38356	3.91675		7.19276	3.71975
105		7.87175	4.40812		7.61095	4.14612		7.38515	3.91662		7.19435	3.71962		7.03855	3.55512		6.76535	3.22212		7.87175	4.40812		7.61095	4.14612		7.38515	3.91662		7.19435	3.71962		7.03855	3.55512		6.76535	3.22212		7.87175	4.40812		7.61095	4.14612		7.38515	3.91662		7.19435	3.71962
106		7.8727	4.40756		7.6119	4.14556		7.3861	3.91606		7.1953	3.71906		7.0395	3.55456		6.7663	3.22156		7.8727	4.40756		7.6119	4.14556		7.3861	3.91606		7.1953	3.71906		7.0395	3.55456		6.7663	3.22156		7.8727	4.40756		7.6119	4.14556		7.3861	3.91606		7.1953	3.71906
107		7.87428	4.40743		7.61348	4.14543		7.38768	3.91593		7.19688	3.71893		7.04108	3.55443		6.76788	3.22143		7.87428	4.40743		7.61348	4.14543		7.38768	3.91593		7.19688	3.71893		7.04108	3.55443		6.76788	3.22143		7.87428	4.40743		7.61348	4.14543		7.38768	3.91593		7.19688	3.71893
108		7.87586	4.40729		7.61506	4.14529		7.38926	3.91579		7.19846	3.71879		7.04266	3.55429		6.76946	3.22129		7.87586	4.40729		7.61506	4.14529		7.38926	3.91579		7.19846	3.71879		7.04266	3.55429		6.76946	3.22129		7.87586	4.40729		7.61506	4.14529		7.38926	3.91579		7.19846	3.71879
109		7.87744	4.40715		7.61664	4.14515		7.39084	3.91565		7.20004	3.71865		7.04424	3.55415		6.77104	3.22115		7.87744	4.40715		7.61664	4.14515		7.39084	3.91565		7.20004	3.71865		7.04424	3.55415		6.77104	3.22115		7.87744	4.40715		7.61664	4.14515		7.39084	3.91565		7.20004	3.71865
110		7.87901	4.40701		7.61821	4.14501		7.39241	3.91551		7.20161	3.71851		7.04581	3.55401		6.77261	3.22101		7.87901	4.40701		7.61821	4.14501		7.39241	3.91551		7.20161	3.71851		7.04581	3.55401		6.77261	3.22101		7.87901	4.40701		7.61821	4.14501		7.39241	3.91551		7.20161	3.71851
111		7.88122	4.4073		7.62042	4.1453		7.39462	3.9158		7.20382	3.7188		7.04802	3.5543		6.77482	3.2213		7.88122	4.4073		7.62042	4.1453		7.39462	3.9158		7.20382	3.7188		7.04802	3.5543		6.77482	3.2213		7.88122	4.4073		7.62042	4.1453		7.39462	3.9158		7.20382	3.7188
112		7.88343	4.40759		7.62263	4.14559		7.39683	3.91609		7.20603	3.71909		7.05023	3.55459		6.77703	3.22159		7.88343	4.40759		7.62263	4.14559		7.39683	3.91609		7.20603	3.71909		7.05023	3.55459		6.77703	3.22159		7.88343	4.40759		7.62263	4.14559		7.39683	3.91609		7.20603	3.71909
113		7.88499	4.40745		7.62419	4.14545		7.39839	3.91595		7.20759	3.71895		7.05179	3.55445		6.77859	3.22145		7.88499	4.40745		7.62419	4.14545		7.39839	3.91595		7.20759	3.71895		7.05179	3.55445		6.77859	3.22145		7.88499	4.40745		7.62419	4.14545		7.39839	3.91595		7.20759	3.71895
114		7.88718	4.40773		7.62638	4.14573		7.40058	3.91623		7.20978	3.71923		7.05398	3.55473		6.78078	3.22173		7.88718	4.40773		7.62638	4.14573		7.40058	3.91623		7.20978	3.71923		7.05398	3.55473		6.78078	3.22173		7.88718	4.40773		7.62638	4.14573		7.40058	3.91623		7.20978	3.71923
115		7.89002	4.40844		7.62922	4.14644		7.40342	3.91694		7.21262	3.71994		7.05682	3.55544		6.78362	3.22244		7.89002	4.40844		7.62922	4.14644		7.40342	3.91694		7.21262	3.71994		7.05682	3.55544		6.78362	3.22244		7.89002	4.40844		7.62922	4.14644		7.40342	3.91694		7.21262	3.71994
116		7.8922	4.40872		7.6314	4.14672		7.4056	3.91722		7.2148	3.72022		7.059	3.55572		6.7858	3.22272		7.8922	4.40872		7.6314	4.14672		7.4056	3.91722		7.2148	3.72022		7.059	3.55572		6.7858	3.22272		7.8922	4.40872		7.6314	4.14672		7.4056	3.91722		7.2148	3.72022
117		7.89503	4.40942		7.63423	4.14742		7.40843	3.91792		7.21763	3.72092		7.06183	3.55642		6.78863	3.22342		7.89503	4.40942		7.63423	4.14742		7.40843	3.91792		7.21763	3.72092		7.06183	3.55642		6.78863	3.22342		7.89503	4.40942		7.63423	4.14742		7.40843	3.91792		7.21763	3.72092
118		7.8972	4.4097		7.6364	4.1477		7.4106	3.9182		7.2198	3.7212		7.064	3.5567		6.7908	3.2237		7.8972	4.4097		7.6364	4.1477		7.4106	3.9182		7.2198	3.7212		7.064	3.5567		6.7908	3.2237		7.8972	4.4097		7.6364	4.1477		7.4106	3.9182		7.2198	3.7212
119		7.90002	4.4104		7.63922	4.1484		7.41342	3.9189		7.22262	3.7219		7.06682	3.5574		6.79362	3.2244		7.90002	4.4104		7.63922	4.1484		7.41342	3.9189		7.22262	3.7219		7.06682	3.5574		6.79362	3.2244		7.90002	4.4104		7.63922	4.1484		7.41342	3.9189		7.22262	3.7219
120		7.90282	4.4111		7.64202	4.1491		7.41622	3.9196		7.22542	3.7226		7.06962	3.5581		6.79642	3.2251		7.90282	4.4111		7.64202	4.1491		7.41622	3.9196		7.22542	3.7226		7.06962	3.5581		6.79642	3.2251		7.90282	4.4111		7.64202	4.1491		7.41622	3.9196		7.22542	3.7226
MORH		LAB at 45 km																		LAB at 50 km																		LAB at 55 km
		no melt			melt 0.5%			melt 1%			melt 1.5%			melt 2%			melt 4%			no melt			melt 0.5%			melt 1%			melt 1.5%			melt 2%			melt 4%			no melt			melt 0.5%			melt 1%			melt 1.5%
Depth		Vp	Vs		Vp	Vs		Vp	Vs		Vp	Vs		Vp	Vs		Vp	Vs		Vp	Vs		Vp	Vs		Vp	Vs		Vp	Vs		Vp	Vs		Vp	Vs		Vp	Vs		Vp	Vs		Vp	Vs		Vp	Vs
1		3.127	1.825		3.127	1.825		3.127	1.825		3.127	1.825		3.127	1.825		3.127	1.825		3.127	1.825		3.127	1.825		3.127	1.825		3.127	1.825		3.127	1.825		3.127	1.825		3.127	1.825		3.127	1.825		3.127	1.825		3.127	1.825
2		5.99085	3.60245		5.99085	3.60245		5.99085	3.60245		5.99085	3.60245		5.99085	3.60245		5.99085	3.60245		5.99085	3.60245		5.99085	3.60245		5.99085	3.60245		5.99085	3.60245		5.99085	3.60245		5.99085	3.60245		5.99085	3.60245		5.99085	3.60245		5.99085	3.60245		5.99085	3.60245
3		5.99862	3.60226		5.99862	3.60226		5.99862	3.60226		5.99862	3.60226		5.99862	3.60226		5.99862	3.60226		5.99862	3.60226		5.99862	3.60226		5.99862	3.60226		5.99862	3.60226		5.99862	3.60226		5.99862	3.60226		5.99862	3.60226		5.99862	3.60226		5.99862	3.60226		5.99862	3.60226
4		6.00638	3.60206		6.00638	3.60206		6.00638	3.60206		6.00638	3.60206		6.00638	3.60206		6.00638	3.60206		6.00638	3.60206		6.00638	3.60206		6.00638	3.60206		6.00638	3.60206		6.00638	3.60206		6.00638	3.60206		6.00638	3.60206		6.00638	3.60206		6.00638	3.60206		6.00638	3.60206
5		6.01415	3.60187		6.01415	3.60187		6.01415	3.60187		6.01415	3.60187		6.01415	3.60187		6.01415	3.60187		6.01415	3.60187		6.01415	3.60187		6.01415	3.60187		6.01415	3.60187		6.01415	3.60187		6.01415	3.60187		6.01415	3.60187		6.01415	3.60187		6.01415	3.60187		6.01415	3.60187
6		6.02824	3.60282		6.02824	3.60282		6.02824	3.60282		6.02824	3.60282		6.02824	3.60282		6.02824	3.60282		6.02824	3.60282		6.02824	3.60282		6.02824	3.60282		6.02824	3.60282		6.02824	3.60282		6.02824	3.60282		6.02824	3.60282		6.02824	3.60282		6.02824	3.60282		6.02824	3.60282
7		6.04234	3.60378		6.04234	3.60378		6.04234	3.60378		6.04234	3.60378		6.04234	3.60378		6.04234	3.60378		6.04234	3.60378		6.04234	3.60378		6.04234	3.60378		6.04234	3.60378		6.04234	3.60378		6.04234	3.60378		6.04234	3.60378		6.04234	3.60378		6.04234	3.60378		6.04234	3.60378
8		6.05643	3.60473		6.05643	3.60473		6.05643	3.60473		6.05643	3.60473		6.05643	3.60473		6.05643	3.60473		6.05643	3.60473		6.05643	3.60473		6.05643	3.60473		6.05643	3.60473		6.05643	3.60473		6.05643	3.60473		6.05643	3.60473		6.05643	3.60473		6.05643	3.60473		6.05643	3.60473
9		6.07052	3.60568		6.07052	3.60568		6.07052	3.60568		6.07052	3.60568		6.07052	3.60568		6.07052	3.60568		6.07052	3.60568		6.07052	3.60568		6.07052	3.60568		6.07052	3.60568		6.07052	3.60568		6.07052	3.60568		6.07052	3.60568		6.07052	3.60568		6.07052	3.60568		6.07052	3.60568
10		6.11477	3.61485		6.11477	3.61485		6.11477	3.61485		6.11477	3.61485		6.11477	3.61485		6.11477	3.61485		6.11477	3.61485		6.11477	3.61485		6.11477	3.61485		6.11477	3.61485		6.11477	3.61485		6.11477	3.61485		6.11477	3.61485		6.11477	3.61485		6.11477	3.61485		6.11477	3.61485
11		6.15902	3.62401		6.15902	3.62401		6.15902	3.62401		6.15902	3.62401		6.15902	3.62401		6.15902	3.62401		6.15902	3.62401		6.15902	3.62401		6.15902	3.62401		6.15902	3.62401		6.15902	3.62401		6.15902	3.62401		6.15902	3.62401		6.15902	3.62401		6.15902	3.62401		6.15902	3.62401
12		6.20326	3.63317		6.20326	3.63317		6.20326	3.63317		6.20326	3.63317		6.20326	3.63317		6.20326	3.63317		6.20326	3.63317		6.20326	3.63317		6.20326	3.63317		6.20326	3.63317		6.20326	3.63317		6.20326	3.63317		6.20326	3.63317		6.20326	3.63317		6.20326	3.63317		6.20326	3.63317
13		6.24751	3.64234		6.24751	3.64234		6.24751	3.64234		6.24751	3.64234		6.24751	3.64234		6.24751	3.64234		6.24751	3.64234		6.24751	3.64234		6.24751	3.64234		6.24751	3.64234		6.24751	3.64234		6.24751	3.64234		6.24751	3.64234		6.24751	3.64234		6.24751	3.64234		6.24751	3.64234
14		6.29176	3.6515		6.29176	3.6515		6.29176	3.6515		6.29176	3.6515		6.29176	3.6515		6.29176	3.6515		6.29176	3.6515		6.29176	3.6515		6.29176	3.6515		6.29176	3.6515		6.29176	3.6515		6.29176	3.6515		6.29176	3.6515		6.29176	3.6515		6.29176	3.6515		6.29176	3.6515
15		6.36542	3.66829		6.36542	3.66829		6.36542	3.66829		6.36542	3.66829		6.36542	3.66829		6.36542	3.66829		6.36542	3.66829		6.36542	3.66829		6.36542	3.66829		6.36542	3.66829		6.36542	3.66829		6.36542	3.66829		6.36542	3.66829		6.36542	3.66829		6.36542	3.66829		6.36542	3.66829
16		6.43909	3.68508		6.43909	3.68508		6.43909	3.68508		6.43909	3.68508		6.43909	3.68508		6.43909	3.68508		6.43909	3.68508		6.43909	3.68508		6.43909	3.68508		6.43909	3.68508		6.43909	3.68508		6.43909	3.68508		6.43909	3.68508		6.43909	3.68508		6.43909	3.68508		6.43909	3.68508
17		6.51275	3.70187		6.51275	3.70187		6.51275	3.70187		6.51275	3.70187		6.51275	3.70187		6.51275	3.70187		6.51275	3.70187		6.51275	3.70187		6.51275	3.70187		6.51275	3.70187		6.51275	3.70187		6.51275	3.70187		6.51275	3.70187		6.51275	3.70187		6.51275	3.70187		6.51275	3.70187
18		6.58641	3.71866		6.58641	3.71866		6.58641	3.71866		6.58641	3.71866		6.58641	3.71866		6.58641	3.71866		6.58641	3.71866		6.58641	3.71866		6.58641	3.71866		6.58641	3.71866		6.58641	3.71866		6.58641	3.71866		6.58641	3.71866		6.58641	3.71866		6.58641	3.71866		6.58641	3.71866
19		6.66008	3.73544		6.66008	3.73544		6.66008	3.73544		6.66008	3.73544		6.66008	3.73544		6.66008	3.73544		6.66008	3.73544		6.66008	3.73544		6.66008	3.73544		6.66008	3.73544		6.66008	3.73544		6.66008	3.73544		6.66008	3.73544		6.66008	3.73544		6.66008	3.73544		6.66008	3.73544
20		6.78896	3.79634		6.78896	3.79634		6.78896	3.79634		6.78896	3.79634		6.78896	3.79634		6.78896	3.79634		6.78896	3.79634		6.78896	3.79634		6.78896	3.79634		6.78896	3.79634		6.78896	3.79634		6.78896	3.79634		6.78896	3.79634		6.78896	3.79634		6.78896	3.79634		6.78896	3.79634
21		6.91785	3.85723		6.91785	3.85723		6.91785	3.85723		6.91785	3.85723		6.91785	3.85723		6.91785	3.85723		6.91785	3.85723		6.91785	3.85723		6.91785	3.85723		6.91785	3.85723		6.91785	3.85723		6.91785	3.85723		6.91785	3.85723		6.91785	3.85723		6.91785	3.85723		6.91785	3.85723
22		7.04674	3.91812		7.04674	3.91812		7.04674	3.91812		7.04674	3.91812		7.04674	3.91812		7.04674	3.91812		7.04674	3.91812		7.04674	3.91812		7.04674	3.91812		7.04674	3.91812		7.04674	3.91812		7.04674	3.91812		7.04674	3.91812		7.04674	3.91812		7.04674	3.91812		7.04674	3.91812
23		7.17563	3.97901		7.17563	3.97901		7.17563	3.97901		7.17563	3.97901		7.17563	3.97901		7.17563	3.97901		7.17563	3.97901		7.17563	3.97901		7.17563	3.97901		7.17563	3.97901		7.17563	3.97901		7.17563	3.97901		7.17563	3.97901		7.17563	3.97901		7.17563	3.97901		7.17563	3.97901
24		7.25517	4.02696		7.25517	4.02696		7.25517	4.02696		7.25517	4.02696		7.25517	4.02696		7.25517	4.02696		7.25517	4.02696		7.25517	4.02696		7.25517	4.02696		7.25517	4.02696		7.25517	4.02696		7.25517	4.02696		7.25517	4.02696		7.25517	4.02696		7.25517	4.02696		7.25517	4.02696
25		7.33471	4.07491		7.33471	4.07491		7.33471	4.07491		7.33471	4.07491		7.33471	4.07491		7.33471	4.07491		7.33471	4.07491		7.33471	4.07491		7.33471	4.07491		7.33471	4.07491		7.33471	4.07491		7.33471	4.07491		7.33471	4.07491		7.33471	4.07491		7.33471	4.07491		7.33471	4.07491
26		7.41425	4.12286		7.41425	4.12286		7.41425	4.12286		7.41425	4.12286		7.41425	4.12286		7.41425	4.12286		7.41425	4.12286		7.41425	4.12286		7.41425	4.12286		7.41425	4.12286		7.41425	4.12286		7.41425	4.12286		7.41425	4.12286		7.41425	4.12286		7.41425	4.12286		7.41425	4.12286
27		7.49379	4.17081		7.49379	4.17081		7.49379	4.17081		7.49379	4.17081		7.49379	4.17081		7.49379	4.17081		7.49379	4.17081		7.49379	4.17081		7.49379	4.17081		7.49379	4.17081		7.49379	4.17081		7.49379	4.17081		7.49379	4.17081		7.49379	4.17081		7.49379	4.17081		7.49379	4.17081
28		7.87348	4.51117		7.87348	4.51117		7.87348	4.51117		7.87348	4.51117		7.87348	4.51117		7.87348	4.51117		7.87348	4.51117		7.87348	4.51117		7.87348	4.51117		7.87348	4.51117		7.87348	4.51117		7.87348	4.51117		7.87348	4.51117		7.87348	4.51117		7.87348	4.51117		7.87348	4.51117
29		7.8649	4.50418		7.8649	4.50418		7.8649	4.50418		7.8649	4.50418		7.8649	4.50418		7.8649	4.50418		7.8649	4.50418		7.8649	4.50418		7.8649	4.50418		7.8649	4.50418		7.8649	4.50418		7.8649	4.50418		7.8649	4.50418		7.8649	4.50418		7.8649	4.50418		7.8649	4.50418
30		7.8563	4.49718		7.8563	4.49718		7.8563	4.49718		7.8563	4.49718		7.8563	4.49718		7.8563	4.49718		7.8563	4.49718		7.8563	4.49718		7.8563	4.49718		7.8563	4.49718		7.8563	4.49718		7.8563	4.49718		7.8563	4.49718		7.8563	4.49718		7.8563	4.49718		7.8563	4.49718
31		7.84833	4.4906		7.84833	4.4906		7.84833	4.4906		7.84833	4.4906		7.84833	4.4906		7.84833	4.4906		7.84833	4.4906		7.84833	4.4906		7.84833	4.4906		7.84833	4.4906		7.84833	4.4906		7.84833	4.4906		7.84833	4.4906		7.84833	4.4906		7.84833	4.4906		7.84833	4.4906
32		7.84101	4.48445		7.84101	4.48445		7.84101	4.48445		7.84101	4.48445		7.84101	4.48445		7.84101	4.48445		7.84101	4.48445		7.84101	4.48445		7.84101	4.48445		7.84101	4.48445		7.84101	4.48445		7.84101	4.48445		7.84101	4.48445		7.84101	4.48445		7.84101	4.48445		7.84101	4.48445
33		7.83367	4.47829		7.83367	4.47829		7.83367	4.47829		7.83367	4.47829		7.83367	4.47829		7.83367	4.47829		7.83367	4.47829		7.83367	4.47829		7.83367	4.47829		7.83367	4.47829		7.83367	4.47829		7.83367	4.47829		7.83367	4.47829		7.83367	4.47829		7.83367	4.47829		7.83367	4.47829
34		7.82631	4.47212		7.82631	4.47212		7.82631	4.47212		7.82631	4.47212		7.82631	4.47212		7.82631	4.47212		7.82631	4.47212		7.82631	4.47212		7.82631	4.47212		7.82631	4.47212		7.82631	4.47212		7.82631	4.47212		7.82631	4.47212		7.82631	4.47212		7.82631	4.47212		7.82631	4.47212
35		7.8196	4.46638		7.8196	4.46638		7.8196	4.46638		7.8196	4.46638		7.8196	4.46638		7.8196	4.46638		7.8196	4.46638		7.8196	4.46638		7.8196	4.46638		7.8196	4.46638		7.8196	4.46638		7.8196	4.46638		7.8196	4.46638		7.8196	4.46638		7.8196	4.46638		7.8196	4.46638
36		7.81138	4.45967		7.81138	4.45967		7.81138	4.45967		7.81138	4.45967		7.81138	4.45967		7.81138	4.45967		7.81289	4.46064		7.81289	4.46064		7.81289	4.46064		7.81289	4.46064		7.81289	4.46064		7.81289	4.46064		7.81289	4.46064		7.81289	4.46064		7.81289	4.46064		7.81289	4.46064
37		7.80329	4.45305		7.80329	4.45305		7.80329	4.45305		7.80329	4.45305		7.80329	4.45305		7.80329	4.45305		7.80682	4.45533		7.80682	4.45533		7.80682	4.45533		7.80682	4.45533		7.80682	4.45533		7.80682	4.45533		7.80682	4.45533		7.80682	4.45533		7.80682	4.45533		7.80682	4.45533
38		7.79517	4.44642		7.79517	4.44642		7.79517	4.44642		7.79517	4.44642		7.79517	4.44642		7.79517	4.44642		7.80142	4.45046		7.80142	4.45046		7.80142	4.45046		7.80142	4.45046		7.80142	4.45046		7.80142	4.45046		7.80142	4.45046		7.80142	4.45046		7.80142	4.45046		7.80142	4.45046
39		7.78544	4.43874		7.78544	4.43874		7.78544	4.43874		7.78544	4.43874		7.78544	4.43874		7.78544	4.43874		7.79534	4.44514		7.79534	4.44514		7.79534	4.44514		7.79534	4.44514		7.79534	4.44514		7.79534	4.44514		7.79534	4.44514		7.79534	4.44514		7.79534	4.44514		7.79534	4.44514
40		7.77577	4.43113		7.77577	4.43113		7.77577	4.43113		7.77577	4.43113		7.77577	4.43113		7.77577	4.43113		7.79058	4.44069		7.79058	4.44069		7.79058	4.44069		7.79058	4.44069		7.79058	4.44069		7.79058	4.44069		7.79058	4.44069		7.79058	4.44069		7.79058	4.44069		7.79058	4.44069
41		7.76375	4.42198		7.76375	4.42198		7.76375	4.42198		7.76375	4.42198		7.76375	4.42198		7.76375	4.42198		7.78366	4.43485		7.78366	4.43485		7.78366	4.43485		7.78366	4.43485		7.78366	4.43485		7.78366	4.43485		7.78515	4.43581		7.78515	4.43581		7.78515	4.43581		7.78515	4.43581
42		7.75078	4.41224		7.75078	4.41224		7.75078	4.41224		7.75078	4.41224		7.75078	4.41224		7.75078	4.41224		7.77756	4.42955		7.77756	4.42955		7.77756	4.42955		7.77756	4.42955		7.77756	4.42955		7.77756	4.42955		7.78104	4.4318		7.78104	4.4318		7.78104	4.4318		7.78104	4.4318
43		7.73409	4.40009		7.73409	4.40009		7.73409	4.40009		7.73409	4.40009		7.73409	4.40009		7.73409	4.40009		7.7701	4.42336		7.7701	4.42336		7.7701	4.42336		7.7701	4.42336		7.7701	4.42336		7.7701	4.42336		7.77627	4.42735		7.77627	4.42735		7.77627	4.42735		7.77627	4.42735
44		7.71397	4.38573		7.71397	4.38573		7.71397	4.38573		7.71397	4.38573		7.71397	4.38573		7.71397	4.38573		7.76237	4.41701		7.76237	4.41701		7.76237	4.41701		7.76237	4.41701		7.76237	4.41701		7.76237	4.41701		7.77215	4.42333		7.77215	4.42333		7.77215	4.42333		7.77215	4.42333
45		7.68902	4.36825		7.68902	4.36825		7.68902	4.36825		7.68902	4.36825		7.68902	4.36825		7.68902	4.36825		7.75406	4.4103		7.75406	4.4103		7.75406	4.4103		7.75406	4.4103		7.75406	4.4103		7.75406	4.4103		7.7687	4.41975		7.7687	4.41975		7.7687	4.41975		7.7687	4.41975
46		7.76952	4.41897		7.50872	4.15697		7.28292	3.92747		7.09212	3.73047		6.93632	3.56597		6.66312	3.23297		7.74406	4.4025		7.74406	4.4025		7.74406	4.4025		7.74406	4.4025		7.74406	4.4025		7.74406	4.4025		7.76377	4.41522		7.76377	4.41522		7.76377	4.41522		7.76377	4.41522
47		7.76605	4.41539		7.50525	4.15339		7.27945	3.92389		7.08865	3.72689		6.93285	3.56239		6.65965	3.22939		7.73181	4.39324		7.73181	4.39324		7.73181	4.39324		7.73181	4.39324		7.73181	4.39324		7.73181	4.39324		7.75833	4.41037		7.75833	4.41037		7.75833	4.41037		7.75833	4.41037
48		7.76325	4.41224		7.50245	4.15024		7.27665	3.92074		7.08585	3.72374		6.93005	3.55924		6.65685	3.22624		7.71717	4.38246		7.71717	4.38246		7.71717	4.38246		7.71717	4.38246		7.71717	4.38246		7.71717	4.38246		7.75287	4.4055		7.75287	4.4055		7.75287	4.4055		7.75287	4.4055
49		7.76044	4.40909		7.49964	4.14709		7.27384	3.91759		7.08304	3.72059		6.92724	3.55609		6.65404	3.22309		7.69847	4.36904		7.69847	4.36904		7.69847	4.36904		7.69847	4.36904		7.69847	4.36904		7.69847	4.36904		7.74648	4.40005		7.74648	4.40005		7.74648	4.40005		7.74648	4.40005
50		7.75763	4.40594		7.49683	4.14394		7.27103	3.91444		7.08023	3.71744		6.92443	3.55294		6.65123	3.21994		7.6743	4.35211		7.6743	4.35211		7.6743	4.35211		7.6743	4.35211		7.6743	4.35211		7.6743	4.35211		7.73885	4.39379		7.73885	4.39379		7.73885	4.39379		7.73885	4.39379
51		7.75548	4.40323		7.49468	4.14123		7.26888	3.91173		7.07808	3.71473		6.92228	3.55023		6.64908	3.21723		7.75548	4.40323		7.49468	4.14123		7.26888	3.91173		7.07808	3.71473		6.92228	3.55023		6.64908	3.21723		7.7302	4.38689		7.7302	4.38689		7.7302	4.38689		7.7302	4.38689
52		7.75333	4.40052		7.49253	4.13852		7.26673	3.90902		7.07593	3.71202		6.92013	3.54752		6.64693	3.21452		7.75333	4.40052		7.49253	4.13852		7.26673	3.90902		7.07593	3.71202		6.92013	3.54752		6.64693	3.21452		7.7193	4.37854		7.7193	4.37854		7.7193	4.37854		7.7193	4.37854
53		7.75184	4.39824		7.49104	4.13624		7.26524	3.90674		7.07444	3.70974		6.91864	3.54524		6.64544	3.21224		7.75184	4.39824		7.49104	4.13624		7.26524	3.90674		7.07444	3.70974		6.91864	3.54524		6.64544	3.21224		7.70603	4.36867		7.70603	4.36867		7.70603	4.36867		7.70603	4.36867
54		7.75035	4.39597		7.48955	4.13397		7.26375	3.90447		7.07295	3.70747		6.91715	3.54297		6.64395	3.20997		7.75035	4.39597		7.48955	4.13397		7.26375	3.90447		7.07295	3.70747		6.91715	3.54297		6.64395	3.20997		7.6887	4.35617		7.6887	4.35617		7.6887	4.35617		7.6887	4.35617
55		7.74886	4.39369		7.48806	4.13169		7.26226	3.90219		7.07146	3.70519		6.91566	3.54069		6.64246	3.20769		7.74886	4.39369		7.48806	4.13169		7.26226	3.90219		7.07146	3.70519		6.91566	3.54069		6.64246	3.20769		7.66591	4.34016		7.66591	4.34016		7.66591	4.34016		7.66591	4.34016
56		7.74736	4.39142		7.48656	4.12942		7.26076	3.89992		7.06996	3.70292		6.91416	3.53842		6.64096	3.20542		7.74736	4.39142		7.48656	4.12942		7.26076	3.89992		7.06996	3.70292		6.91416	3.53842		6.64096	3.20542		7.74736	4.39142		7.48656	4.12942		7.26076	3.89992		7.06996	3.70292
57		7.74652	4.38958		7.48572	4.12758		7.25992	3.89808		7.06912	3.70108		6.91332	3.53658		6.64012	3.20358		7.74652	4.38958		7.48572	4.12758		7.25992	3.89808		7.06912	3.70108		6.91332	3.53658		6.64012	3.20358		7.74652	4.38958		7.48572	4.12758		7.25992	3.89808		7.06912	3.70108
58		7.74569	4.38774		7.48489	4.12574		7.25909	3.89624		7.06829	3.69924		6.91249	3.53474		6.63929	3.20174		7.74569	4.38774		7.48489	4.12574		7.25909	3.89624		7.06829	3.69924		6.91249	3.53474		6.63929	3.20174		7.74569	4.38774		7.48489	4.12574		7.25909	3.89624		7.06829	3.69924
59		7.74551	4.38634		7.48471	4.12434		7.25891	3.89484		7.06811	3.69784		6.91231	3.53334		6.63911	3.20034		7.74551	4.38634		7.48471	4.12434		7.25891	3.89484		7.06811	3.69784		6.91231	3.53334		6.63911	3.20034		7.74551	4.38634		7.48471	4.12434		7.25891	3.89484		7.06811	3.69784
60		7.74533	4.38494		7.48453	4.12294		7.25873	3.89344		7.06793	3.69644		6.91213	3.53194		6.63893	3.19894		7.74533	4.38494		7.48453	4.12294		7.25873	3.89344		7.06793	3.69644		6.91213	3.53194		6.63893	3.19894		7.74533	4.38494		7.48453	4.12294		7.25873	3.89344		7.06793	3.69644
61		7.74515	4.38353		7.48435	4.12153		7.25855	3.89203		7.06775	3.69503		6.91195	3.53053		6.63875	3.19753		7.74515	4.38353		7.48435	4.12153		7.25855	3.89203		7.06775	3.69503		6.91195	3.53053		6.63875	3.19753		7.74515	4.38353		7.48435	4.12153		7.25855	3.89203		7.06775	3.69503
62		7.74496	4.38213		7.48416	4.12013		7.25836	3.89063		7.06756	3.69363		6.91176	3.52913		6.63856	3.19613		7.74496	4.38213		7.48416	4.12013		7.25836	3.89063		7.06756	3.69363		6.91176	3.52913		6.63856	3.19613		7.74496	4.38213		7.48416	4.12013		7.25836	3.89063		7.06756	3.69363
63		7.74543	4.38116		7.48463	4.11916		7.25883	3.88966		7.06803	3.69266		6.91223	3.52816		6.63903	3.19516		7.74543	4.38116		7.48463	4.11916		7.25883	3.88966		7.06803	3.69266		6.91223	3.52816		6.63903	3.19516		7.74543	4.38116		7.48463	4.11916		7.25883	3.88966		7.06803	3.69266
64		7.7459	4.38019		7.4851	4.11819		7.2593	3.88869		7.0685	3.69169		6.9127	3.52719		6.6395	3.19419		7.7459	4.38019		7.4851	4.11819		7.2593	3.88869		7.0685	3.69169		6.9127	3.52719		6.6395	3.19419		7.7459	4.38019		7.4851	4.11819		7.2593	3.88869		7.0685	3.69169
65		7.74637	4.37922		7.48557	4.11722		7.25977	3.88772		7.06897	3.69072		6.91317	3.52622		6.63997	3.19322		7.74637	4.37922		7.48557	4.11722		7.25977	3.88772		7.06897	3.69072		6.91317	3.52622		6.63997	3.19322		7.74637	4.37922		7.48557	4.11722		7.25977	3.88772		7.06897	3.69072
66		7.74749	4.37869		7.48669	4.11669		7.26089	3.88719		7.07009	3.69019		6.91429	3.52569		6.64109	3.19269		7.74749	4.37869		7.48669	4.11669		7.26089	3.88719		7.07009	3.69019		6.91429	3.52569		6.64109	3.19269		7.74749	4.37869		7.48669	4.11669		7.26089	3.88719		7.07009	3.69019
67		7.74861	4.37816		7.48781	4.11616		7.26201	3.88666		7.07121	3.68966		6.91541	3.52516		6.64221	3.19216		7.74861	4.37816		7.48781	4.11616		7.26201	3.88666		7.07121	3.68966		6.91541	3.52516		6.64221	3.19216		7.74861	4.37816		7.48781	4.11616		7.26201	3.88666		7.07121	3.68966
68		7.74973	4.37762		7.48893	4.11562		7.26313	3.88612		7.07233	3.68912		6.91653	3.52462		6.64333	3.19162		7.74973	4.37762		7.48893	4.11562		7.26313	3.88612		7.07233	3.68912		6.91653	3.52462		6.64333	3.19162		7.74973	4.37762		7.48893	4.11562		7.26313	3.88612		7.07233	3.68912
69		7.75084	4.37708		7.49004	4.11508		7.26424	3.88558		7.07344	3.68858		6.91764	3.52408		6.64444	3.19108		7.75084	4.37708		7.49004	4.11508		7.26424	3.88558		7.07344	3.68858		6.91764	3.52408		6.64444	3.19108		7.75084	4.37708		7.49004	4.11508		7.26424	3.88558		7.07344	3.68858
70		7.75195	4.37655		7.49115	4.11455		7.26535	3.88505		7.07455	3.68805		6.91875	3.52355		6.64555	3.19055		7.75195	4.37655		7.49115	4.11455		7.26535	3.88505		7.07455	3.68805		6.91875	3.52355		6.64555	3.19055		7.75195	4.37655		7.49115	4.11455		7.26535	3.88505		7.07455	3.68805
71		7.75371	4.37644		7.49291	4.11444		7.26711	3.88494		7.07631	3.68794		6.92051	3.52344		6.64731	3.19044		7.75371	4.37644		7.49291	4.11444		7.26711	3.88494		7.07631	3.68794		6.92051	3.52344		6.64731	3.19044		7.75371	4.37644		7.49291	4.11444		7.26711	3.88494		7.07631	3.68794
72		7.75547	4.37634		7.49467	4.11434		7.26887	3.88484		7.07807	3.68784		6.92227	3.52334		6.64907	3.19034		7.75547	4.37634		7.49467	4.11434		7.26887	3.88484		7.07807	3.68784		6.92227	3.52334		6.64907	3.19034		7.75547	4.37634		7.49467	4.11434		7.26887	3.88484		7.07807	3.68784
73		7.75722	4.37624		7.49642	4.11424		7.27062	3.88474		7.07982	3.68774		6.92402	3.52324		6.65082	3.19024		7.75722	4.37624		7.49642	4.11424		7.27062	3.88474		7.07982	3.68774		6.92402	3.52324		6.65082	3.19024		7.75722	4.37624		7.49642	4.11424		7.27062	3.88474		7.07982	3.68774
74		7.75897	4.37613		7.49817	4.11413		7.27237	3.88463		7.08157	3.68763		6.92577	3.52313		6.65257	3.19013		7.75897	4.37613		7.49817	4.11413		7.27237	3.88463		7.08157	3.68763		6.92577	3.52313		6.65257	3.19013		7.75897	4.37613		7.49817	4.11413		7.27237	3.88463		7.08157	3.68763
75		7.76071	4.37602		7.49991	4.11402		7.27411	3.88452		7.08331	3.68752		6.92751	3.52302		6.65431	3.19002		7.76071	4.37602		7.49991	4.11402		7.27411	3.88452		7.08331	3.68752		6.92751	3.52302		6.65431	3.19002		7.76071	4.37602		7.49991	4.11402		7.27411	3.88452		7.08331	3.68752
76		7.76311	4.37635		7.50231	4.11435		7.27651	3.88485		7.08571	3.68785		6.92991	3.52335		6.65671	3.19035		7.76311	4.37635		7.50231	4.11435		7.27651	3.88485		7.08571	3.68785		6.92991	3.52335		6.65671	3.19035		7.76311	4.37635		7.50231	4.11435		7.27651	3.88485		7.08571	3.68785
77		7.76551	4.37667		7.50471	4.11467		7.27891	3.88517		7.08811	3.68817		6.93231	3.52367		6.65911	3.19067		7.76551	4.37667		7.50471	4.11467		7.27891	3.88517		7.08811	3.68817		6.93231	3.52367		6.65911	3.19067		7.76551	4.37667		7.50471	4.11467		7.27891	3.88517		7.08811	3.68817
78		7.76789	4.377		7.50709	4.115		7.28129	3.8855		7.09049	3.6885		6.93469	3.524		6.66149	3.191		7.76789	4.377		7.50709	4.115		7.28129	3.8855		7.09049	3.6885		6.93469	3.524		6.66149	3.191		7.76789	4.377		7.50709	4.115		7.28129	3.8855		7.09049	3.6885
79		7.77027	4.37732		7.50947	4.11532		7.28367	3.88582		7.09287	3.68882		6.93707	3.52432		6.66387	3.19132		7.77027	4.37732		7.50947	4.11532		7.28367	3.88582		7.09287	3.68882		6.93707	3.52432		6.66387	3.19132		7.77027	4.37732		7.50947	4.11532		7.28367	3.88582		7.09287	3.68882
80		7.77265	4.37764		7.51185	4.11564		7.28605	3.88614		7.09525	3.68914		6.93945	3.52464		6.66625	3.19164		7.77265	4.37764		7.51185	4.11564		7.28605	3.88614		7.09525	3.68914		6.93945	3.52464		6.66625	3.19164		7.77265	4.37764		7.51185	4.11564		7.28605	3.88614		7.09525	3.68914
81		7.77568	4.37839		7.51488	4.11639		7.28908	3.88689		7.09828	3.68989		6.94248	3.52539		6.66928	3.19239		7.77568	4.37839		7.51488	4.11639		7.28908	3.88689		7.09828	3.68989		6.94248	3.52539		6.66928	3.19239		7.77568	4.37839		7.51488	4.11639		7.28908	3.88689		7.09828	3.68989
82		7.79434	4.38503		7.53354	4.12303		7.30774	3.89353		7.11694	3.69653		6.96114	3.53203		6.68794	3.19903		7.79434	4.38503		7.53354	4.12303		7.30774	3.89353		7.11694	3.69653		6.96114	3.53203		6.68794	3.19903		7.79434	4.38503		7.53354	4.12303		7.30774	3.89353		7.11694	3.69653
83		7.79735	4.38578		7.53655	4.12378		7.31075	3.89428		7.11995	3.69728		6.96415	3.53278		6.69095	3.19978		7.79735	4.38578		7.53655	4.12378		7.31075	3.89428		7.11995	3.69728		6.96415	3.53278		6.69095	3.19978		7.79735	4.38578		7.53655	4.12378		7.31075	3.89428		7.11995	3.69728
84		7.79971	4.38611		7.53891	4.12411		7.31311	3.89461		7.12231	3.69761		6.96651	3.53311		6.69331	3.20011		7.79971	4.38611		7.53891	4.12411		7.31311	3.89461		7.12231	3.69761		6.96651	3.53311		6.69331	3.20011		7.79971	4.38611		7.53891	4.12411		7.31311	3.89461		7.12231	3.69761
85		7.80272	4.38686		7.54192	4.12486		7.31612	3.89536		7.12532	3.69836		6.96952	3.53386		6.69632	3.20086		7.80272	4.38686		7.54192	4.12486		7.31612	3.89536		7.12532	3.69836		6.96952	3.53386		6.69632	3.20086		7.80272	4.38686		7.54192	4.12486		7.31612	3.89536		7.12532	3.69836
86		7.80572	4.38761		7.54492	4.12561		7.31912	3.89611		7.12832	3.69911		6.97252	3.53461		6.69932	3.20161		7.80572	4.38761		7.54492	4.12561		7.31912	3.89611		7.12832	3.69911		6.97252	3.53461		6.69932	3.20161		7.80572	4.38761		7.54492	4.12561		7.31912	3.89611		7.12832	3.69911
87		7.80871	4.38836		7.54791	4.12636		7.32211	3.89686		7.13131	3.69986		6.97551	3.53536		6.70231	3.20236		7.80871	4.38836		7.54791	4.12636		7.32211	3.89686		7.13131	3.69986		6.97551	3.53536		6.70231	3.20236		7.80871	4.38836		7.54791	4.12636		7.32211	3.89686		7.13131	3.69986
88		7.8117	4.3891		7.5509	4.1271		7.3251	3.8976		7.1343	3.7006		6.9785	3.5361		6.7053	3.2031		7.8117	4.3891		7.5509	4.1271		7.3251	3.8976		7.1343	3.7006		6.9785	3.5361		6.7053	3.2031		7.8117	4.3891		7.5509	4.1271		7.3251	3.8976		7.1343	3.7006
89		7.81468	4.38985		7.55388	4.12785		7.32808	3.89835		7.13728	3.70135		6.98148	3.53685		6.70828	3.20385		7.81468	4.38985		7.55388	4.12785		7.32808	3.89835		7.13728	3.70135		6.98148	3.53685		6.70828	3.20385		7.81468	4.38985		7.55388	4.12785		7.32808	3.89835		7.13728	3.70135
90		7.8183	4.39102		7.5575	4.12902		7.3317	3.89952		7.1409	3.70252		6.9851	3.53802		6.7119	3.20502		7.8183	4.39102		7.5575	4.12902		7.3317	3.89952		7.1409	3.70252		6.9851	3.53802		6.7119	3.20502		7.8183	4.39102		7.5575	4.12902		7.3317	3.89952		7.1409	3.70252
91		7.82127	4.39176		7.56047	4.12976		7.33467	3.90026		7.14387	3.70326		6.98807	3.53876		6.71487	3.20576		7.82127	4.39176		7.56047	4.12976		7.33467	3.90026		7.14387	3.70326		6.98807	3.53876		6.71487	3.20576		7.82127	4.39176		7.56047	4.12976		7.33467	3.90026		7.14387	3.70326
92		7.82423	4.3925		7.56343	4.1305		7.33763	3.901		7.14683	3.704		6.99103	3.5395		6.71783	3.2065		7.82423	4.3925		7.56343	4.1305		7.33763	3.901		7.14683	3.704		6.99103	3.5395		6.71783	3.2065		7.82423	4.3925		7.56343	4.1305		7.33763	3.901		7.14683	3.704
93		7.82784	4.39367		7.56704	4.13167		7.34124	3.90217		7.15044	3.70517		6.99464	3.54067		6.72144	3.20767		7.82784	4.39367		7.56704	4.13167		7.34124	3.90217		7.15044	3.70517		6.99464	3.54067		6.72144	3.20767		7.82784	4.39367		7.56704	4.13167		7.34124	3.90217		7.15044	3.70517
94		7.83079	4.39441		7.56999	4.13241		7.34419	3.90291		7.15339	3.70591		6.99759	3.54141		6.72439	3.20841		7.83079	4.39441		7.56999	4.13241		7.34419	3.90291		7.15339	3.70591		6.99759	3.54141		6.72439	3.20841		7.83079	4.39441		7.56999	4.13241		7.34419	3.90291		7.15339	3.70591
95		7.83373	4.39514		7.57293	4.13314		7.34713	3.90364		7.15633	3.70664		7.00053	3.54214		6.72733	3.20914		7.83373	4.39514		7.57293	4.13314		7.34713	3.90364		7.15633	3.70664		7.00053	3.54214		6.72733	3.20914		7.83373	4.39514		7.57293	4.13314		7.34713	3.90364		7.15633	3.70664
96		7.83732	4.3963		7.57652	4.1343		7.35072	3.9048		7.15992	3.7078		7.00412	3.5433		6.73092	3.2103		7.83732	4.3963		7.57652	4.1343		7.35072	3.9048		7.15992	3.7078		7.00412	3.5433		6.73092	3.2103		7.83732	4.3963		7.57652	4.1343		7.35072	3.9048		7.15992	3.7078
97		7.84025	4.39704		7.57945	4.13504		7.35365	3.90554		7.16285	3.70854		7.00705	3.54404		6.73385	3.21104		7.84025	4.39704		7.57945	4.13504		7.35365	3.90554		7.16285	3.70854		7.00705	3.54404		6.73385	3.21104		7.84025	4.39704		7.57945	4.13504		7.35365	3.90554		7.16285	3.70854
98		7.84383	4.3982		7.58303	4.1362		7.35723	3.9067		7.16643	3.7097		7.01063	3.5452		6.73743	3.2122		7.84383	4.3982		7.58303	4.1362		7.35723	3.9067		7.16643	3.7097		7.01063	3.5452		6.73743	3.2122		7.84383	4.3982		7.58303	4.1362		7.35723	3.9067		7.16643	3.7097
99		7.84675	4.39892		7.58595	4.13692		7.36015	3.90742		7.16935	3.71042		7.01355	3.54592		6.74035	3.21292		7.84675	4.39892		7.58595	4.13692		7.36015	3.90742		7.16935	3.71042		7.01355	3.54592		6.74035	3.21292		7.84675	4.39892		7.58595	4.13692		7.36015	3.90742		7.16935	3.71042
100		7.85031	4.40008		7.58951	4.13808		7.36371	3.90858		7.17291	3.71158		7.01711	3.54708		6.74391	3.21408		7.85031	4.40008		7.58951	4.13808		7.36371	3.90858		7.17291	3.71158		7.01711	3.54708		6.74391	3.21408		7.85031	4.40008		7.58951	4.13808		7.36371	3.90858		7.17291	3.71158
101		7.85322	4.40081		7.59242	4.13881		7.36662	3.90931		7.17582	3.71231		7.02002	3.54781		6.74682	3.21481		7.85322	4.40081		7.59242	4.13881		7.36662	3.90931		7.17582	3.71231		7.02002	3.54781		6.74682	3.21481		7.85322	4.40081		7.59242	4.13881		7.36662	3.90931		7.17582	3.71231
102		7.85613	4.40153		7.59533	4.13953		7.36953	3.91003		7.17873	3.71303		7.02293	3.54853		6.74973	3.21553		7.85613	4.40153		7.59533	4.13953		7.36953	3.91003		7.17873	3.71303		7.02293	3.54853		6.74973	3.21553		7.85613	4.40153		7.59533	4.13953		7.36953	3.91003		7.17873	3.71303
103		7.85967	4.40268		7.59887	4.14068		7.37307	3.91118		7.18227	3.71418		7.02647	3.54968		6.75327	3.21668		7.85967	4.40268		7.59887	4.14068		7.37307	3.91118		7.18227	3.71418		7.02647	3.54968		6.75327	3.21668		7.85967	4.40268		7.59887	4.14068		7.37307	3.91118		7.18227	3.71418
104		7.86256	4.4034		7.60176	4.1414		7.37596	3.9119		7.18516	3.7149		7.02936	3.5504		6.75616	3.2174		7.86256	4.4034		7.60176	4.1414		7.37596	3.9119		7.18516	3.7149		7.02936	3.5504		6.75616	3.2174		7.86256	4.4034		7.60176	4.1414		7.37596	3.9119		7.18516	3.7149
105		7.86545	4.40412		7.60465	4.14212		7.37885	3.91262		7.18805	3.71562		7.03225	3.55112		6.75905	3.21812		7.86545	4.40412		7.60465	4.14212		7.37885	3.91262		7.18805	3.71562		7.03225	3.55112		6.75905	3.21812		7.86545	4.40412		7.60465	4.14212		7.37885	3.91262		7.18805	3.71562
106		7.86833	4.40484		7.60753	4.14284		7.38173	3.91334		7.19093	3.71634		7.03513	3.55184		6.76193	3.21884		7.86833	4.40484		7.60753	4.14284		7.38173	3.91334		7.19093	3.71634		7.03513	3.55184		6.76193	3.21884		7.86833	4.40484		7.60753	4.14284		7.38173	3.91334		7.19093	3.71634
107		7.87121	4.40556		7.61041	4.14356		7.38461	3.91406		7.19381	3.71706		7.03801	3.55256		6.76481	3.21956		7.87121	4.40556		7.61041	4.14356		7.38461	3.91406		7.19381	3.71706		7.03801	3.55256		6.76481	3.21956		7.87121	4.40556		7.61041	4.14356		7.38461	3.91406		7.19381	3.71706
108		7.87408	4.40628		7.61328	4.14428		7.38748	3.91478		7.19668	3.71778		7.04088	3.55328		6.76768	3.22028		7.87408	4.40628		7.61328	4.14428		7.38748	3.91478		7.19668	3.71778		7.04088	3.55328		6.76768	3.22028		7.87408	4.40628		7.61328	4.14428		7.38748	3.91478		7.19668	3.71778
109		7.87694	4.40699		7.61614	4.14499		7.39034	3.91549		7.19954	3.71849		7.04374	3.55399		6.77054	3.22099		7.87694	4.40699		7.61614	4.14499		7.39034	3.91549		7.19954	3.71849		7.04374	3.55399		6.77054	3.22099		7.87694	4.40699		7.61614	4.14499		7.39034	3.91549		7.19954	3.71849
110		7.87916	4.40728		7.61836	4.14528		7.39256	3.91578		7.20176	3.71878		7.04596	3.55428		6.77276	3.22128		7.87916	4.40728		7.61836	4.14528		7.39256	3.91578		7.20176	3.71878		7.04596	3.55428		6.77276	3.22128		7.87916	4.40728		7.61836	4.14528		7.39256	3.91578		7.20176	3.71878
111		7.88201	4.40799		7.62121	4.14599		7.39541	3.91649		7.20461	3.71949		7.04881	3.55499		6.77561	3.22199		7.88201	4.40799		7.62121	4.14599		7.39541	3.91649		7.20461	3.71949		7.04881	3.55499		6.77561	3.22199		7.88201	4.40799		7.62121	4.14599		7.39541	3.91649		7.20461	3.71949
112		7.88486	4.4087		7.62406	4.1467		7.39826	3.9172		7.20746	3.7202		7.05166	3.5557		6.77846	3.2227		7.88486	4.4087		7.62406	4.1467		7.39826	3.9172		7.20746	3.7202		7.05166	3.5557		6.77846	3.2227		7.88486	4.4087		7.62406	4.1467		7.39826	3.9172		7.20746	3.7202
113		7.88706	4.40898		7.62626	4.14698		7.40046	3.91748		7.20966	3.72048		7.05386	3.55598		6.78066	3.22298		7.88706	4.40898		7.62626	4.14698		7.40046	3.91748		7.20966	3.72048		7.05386	3.55598		6.78066	3.22298		7.88706	4.40898		7.62626	4.14698		7.40046	3.91748		7.20966	3.72048
114		7.88926	4.40927		7.62846	4.14727		7.40266	3.91777		7.21186	3.72077		7.05606	3.55627		6.78286	3.22327		7.88926	4.40927		7.62846	4.14727		7.40266	3.91777		7.21186	3.72077		7.05606	3.55627		6.78286	3.22327		7.88926	4.40927		7.62846	4.14727		7.40266	3.91777		7.21186	3.72077
115		7.89145	4.40955		7.63065	4.14755		7.40485	3.91805		7.21405	3.72105		7.05825	3.55655		6.78505	3.22355		7.89145	4.40955		7.63065	4.14755		7.40485	3.91805		7.21405	3.72105		7.05825	3.55655		6.78505	3.22355		7.89145	4.40955		7.63065	4.14755		7.40485	3.91805		7.21405	3.72105
116		7.89364	4.40983		7.63284	4.14783		7.40704	3.91833		7.21624	3.72133		7.06044	3.55683		6.78724	3.22383		7.89364	4.40983		7.63284	4.14783		7.40704	3.91833		7.21624	3.72133		7.06044	3.55683		6.78724	3.22383		7.89364	4.40983		7.63284	4.14783		7.40704	3.91833		7.21624	3.72133
117		7.89582	4.41011		7.63502	4.14811		7.40922	3.91861		7.21842	3.72161		7.06262	3.55711		6.78942	3.22411		7.89582	4.41011		7.63502	4.14811		7.40922	3.91861		7.21842	3.72161		7.06262	3.55711		6.78942	3.22411		7.89582	4.41011		7.63502	4.14811		7.40922	3.91861		7.21842	3.72161
118		7.89799	4.41039		7.63719	4.14839		7.41139	3.91889		7.22059	3.72189		7.06479	3.55739		6.79159	3.22439		7.89799	4.41039		7.63719	4.14839		7.41139	3.91889		7.22059	3.72189		7.06479	3.55739		6.79159	3.22439		7.89799	4.41039		7.63719	4.14839		7.41139	3.91889		7.22059	3.72189
119		7.89953	4.41024		7.63873	4.14824		7.41293	3.91874		7.22213	3.72174		7.06633	3.55724		6.79313	3.22424		7.89953	4.41024		7.63873	4.14824		7.41293	3.91874		7.22213	3.72174		7.06633	3.55724		6.79313	3.22424		7.89953	4.41024		7.63873	4.14824		7.41293	3.91874		7.22213	3.72174
120		7.90105	4.41009		7.64025	4.14809		7.41445	3.91859		7.22365	3.72159		7.06785	3.55709		6.79465	3.22409		7.90105	4.41009		7.64025	4.14809		7.41445	3.91859		7.22365	3.72159		7.06785	3.55709		6.79465	3.22409		7.90105	4.41009		7.64025	4.14809		7.41445	3.91859		7.22365	3.72159
LTVH		LAB at 35 km																		LAB at 40 km																		LAB at 45 km
		no melt			melt 0.5%			melt 1%			melt 1.5%			melt 2%			melt 4%			no melt			melt 0.5%			melt 1%			melt 1.5%			melt 2%			melt 4%			no melt			melt 0.5%			melt 1%			melt 1.5%
Depth		Vp	Vs		Vp	Vs		Vp	Vs		Vp	Vs		Vp	Vs		Vp	Vs		Vp	Vs		Vp	Vs		Vp	Vs		Vp	Vs		Vp	Vs		Vp	Vs		Vp	Vs		Vp	Vs		Vp	Vs		Vp	Vs
1		2.0406	1.14		2.0406	1.14		2.0406	1.14		2.0406	1.14		2.0406	1.14		2.0406	1.14		2.0406	1.14		2.0406	1.14		2.0406	1.14		2.0406	1.14		2.0406	1.14		2.0406	1.14		2.0406	1.14		2.0406	1.14		2.0406	1.14		2.0406	1.14
2		2.95947	1.65333		2.95947	1.65333		2.95947	1.65333		2.95947	1.65333		2.95947	1.65333		2.95947	1.65333		2.95947	1.65333		2.95947	1.65333		2.95947	1.65333		2.95947	1.65333		2.95947	1.65333		2.95947	1.65333		2.95947	1.65333		2.95947	1.65333		2.95947	1.65333		2.95947	1.65333
3		3.87833	2.16667		3.87833	2.16667		3.87833	2.16667		3.87833	2.16667		3.87833	2.16667		3.87833	2.16667		3.87833	2.16667		3.87833	2.16667		3.87833	2.16667		3.87833	2.16667		3.87833	2.16667		3.87833	2.16667		3.87833	2.16667		3.87833	2.16667		3.87833	2.16667		3.87833	2.16667
4		4.7972	2.68		4.7972	2.68		4.7972	2.68		4.7972	2.68		4.7972	2.68		4.7972	2.68		4.7972	2.68		4.7972	2.68		4.7972	2.68		4.7972	2.68		4.7972	2.68		4.7972	2.68		4.7972	2.68		4.7972	2.68		4.7972	2.68		4.7972	2.68
5		5.39047	3.13208		5.39047	3.13208		5.39047	3.13208		5.39047	3.13208		5.39047	3.13208		5.39047	3.13208		5.39047	3.13208		5.39047	3.13208		5.39047	3.13208		5.39047	3.13208		5.39047	3.13208		5.39047	3.13208		5.39047	3.13208		5.39047	3.13208		5.39047	3.13208		5.39047	3.13208
6		5.98374	3.58415		5.98374	3.58415		5.98374	3.58415		5.98374	3.58415		5.98374	3.58415		5.98374	3.58415		5.98374	3.58415		5.98374	3.58415		5.98374	3.58415		5.98374	3.58415		5.98374	3.58415		5.98374	3.58415		5.98374	3.58415		5.98374	3.58415		5.98374	3.58415		5.98374	3.58415
7		5.99906	3.58871		5.99906	3.58871		5.99906	3.58871		5.99906	3.58871		5.99906	3.58871		5.99906	3.58871		5.99906	3.58871		5.99906	3.58871		5.99906	3.58871		5.99906	3.58871		5.99906	3.58871		5.99906	3.58871		5.99906	3.58871		5.99906	3.58871		5.99906	3.58871		5.99906	3.58871
8		6.01438	3.59327		6.01438	3.59327		6.01438	3.59327		6.01438	3.59327		6.01438	3.59327		6.01438	3.59327		6.01438	3.59327		6.01438	3.59327		6.01438	3.59327		6.01438	3.59327		6.01438	3.59327		6.01438	3.59327		6.01438	3.59327		6.01438	3.59327		6.01438	3.59327		6.01438	3.59327
9		6.04954	3.60446		6.04954	3.60446		6.04954	3.60446		6.04954	3.60446		6.04954	3.60446		6.04954	3.60446		6.04954	3.60446		6.04954	3.60446		6.04954	3.60446		6.04954	3.60446		6.04954	3.60446		6.04954	3.60446		6.04954	3.60446		6.04954	3.60446		6.04954	3.60446		6.04954	3.60446
10		6.08471	3.61565		6.08471	3.61565		6.08471	3.61565		6.08471	3.61565		6.08471	3.61565		6.08471	3.61565		6.08471	3.61565		6.08471	3.61565		6.08471	3.61565		6.08471	3.61565		6.08471	3.61565		6.08471	3.61565		6.08471	3.61565		6.08471	3.61565		6.08471	3.61565		6.08471	3.61565
11		6.16414	3.63732		6.16414	3.63732		6.16414	3.63732		6.16414	3.63732		6.16414	3.63732		6.16414	3.63732		6.16414	3.63732		6.16414	3.63732		6.16414	3.63732		6.16414	3.63732		6.16414	3.63732		6.16414	3.63732		6.16414	3.63732		6.16414	3.63732		6.16414	3.63732		6.16414	3.63732
12		6.24358	3.65899		6.24358	3.65899		6.24358	3.65899		6.24358	3.65899		6.24358	3.65899		6.24358	3.65899		6.24358	3.65899		6.24358	3.65899		6.24358	3.65899		6.24358	3.65899		6.24358	3.65899		6.24358	3.65899		6.24358	3.65899		6.24358	3.65899		6.24358	3.65899		6.24358	3.65899
13		6.32301	3.68066		6.32301	3.68066		6.32301	3.68066		6.32301	3.68066		6.32301	3.68066		6.32301	3.68066		6.32301	3.68066		6.32301	3.68066		6.32301	3.68066		6.32301	3.68066		6.32301	3.68066		6.32301	3.68066		6.32301	3.68066		6.32301	3.68066		6.32301	3.68066		6.32301	3.68066
14		6.45373	3.7145		6.45373	3.7145		6.45373	3.7145		6.45373	3.7145		6.45373	3.7145		6.45373	3.7145		6.45373	3.7145		6.45373	3.7145		6.45373	3.7145		6.45373	3.7145		6.45373	3.7145		6.45373	3.7145		6.45373	3.7145		6.45373	3.7145		6.45373	3.7145		6.45373	3.7145
15		6.58444	3.74834		6.58444	3.74834		6.58444	3.74834		6.58444	3.74834		6.58444	3.74834		6.58444	3.74834		6.58444	3.74834		6.58444	3.74834		6.58444	3.74834		6.58444	3.74834		6.58444	3.74834		6.58444	3.74834		6.58444	3.74834		6.58444	3.74834		6.58444	3.74834		6.58444	3.74834
16		6.71515	3.78217		6.71515	3.78217		6.71515	3.78217		6.71515	3.78217		6.71515	3.78217		6.71515	3.78217		6.71515	3.78217		6.71515	3.78217		6.71515	3.78217		6.71515	3.78217		6.71515	3.78217		6.71515	3.78217		6.71515	3.78217		6.71515	3.78217		6.71515	3.78217		6.71515	3.78217
17		6.84711	3.8442		6.84711	3.8442		6.84711	3.8442		6.84711	3.8442		6.84711	3.8442		6.84711	3.8442		6.84711	3.8442		6.84711	3.8442		6.84711	3.8442		6.84711	3.8442		6.84711	3.8442		6.84711	3.8442		6.84711	3.8442		6.84711	3.8442		6.84711	3.8442		6.84711	3.8442
18		6.97907	3.90623		6.97907	3.90623		6.97907	3.90623		6.97907	3.90623		6.97907	3.90623		6.97907	3.90623		6.97907	3.90623		6.97907	3.90623		6.97907	3.90623		6.97907	3.90623		6.97907	3.90623		6.97907	3.90623		6.97907	3.90623		6.97907	3.90623		6.97907	3.90623		6.97907	3.90623
19		7.11103	3.96826		7.11103	3.96826		7.11103	3.96826		7.11103	3.96826		7.11103	3.96826		7.11103	3.96826		7.11103	3.96826		7.11103	3.96826		7.11103	3.96826		7.11103	3.96826		7.11103	3.96826		7.11103	3.96826		7.11103	3.96826		7.11103	3.96826		7.11103	3.96826		7.11103	3.96826
20		7.24299	4.03028		7.24299	4.03028		7.24299	4.03028		7.24299	4.03028		7.24299	4.03028		7.24299	4.03028		7.24299	4.03028		7.24299	4.03028		7.24299	4.03028		7.24299	4.03028		7.24299	4.03028		7.24299	4.03028		7.24299	4.03028		7.24299	4.03028		7.24299	4.03028		7.24299	4.03028
21		7.35177	4.09603		7.35177	4.09603		7.35177	4.09603		7.35177	4.09603		7.35177	4.09603		7.35177	4.09603		7.35177	4.09603		7.35177	4.09603		7.35177	4.09603		7.35177	4.09603		7.35177	4.09603		7.35177	4.09603		7.35177	4.09603		7.35177	4.09603		7.35177	4.09603		7.35177	4.09603
22		7.46055	4.16178		7.46055	4.16178		7.46055	4.16178		7.46055	4.16178		7.46055	4.16178		7.46055	4.16178		7.46055	4.16178		7.46055	4.16178		7.46055	4.16178		7.46055	4.16178		7.46055	4.16178		7.46055	4.16178		7.46055	4.16178		7.46055	4.16178		7.46055	4.16178		7.46055	4.16178
23		7.56933	4.22752		7.56933	4.22752		7.56933	4.22752		7.56933	4.22752		7.56933	4.22752		7.56933	4.22752		7.56933	4.22752		7.56933	4.22752		7.56933	4.22752		7.56933	4.22752		7.56933	4.22752		7.56933	4.22752		7.56933	4.22752		7.56933	4.22752		7.56933	4.22752		7.56933	4.22752
24		7.98167	4.58724		7.98167	4.58724		7.98167	4.58724		7.98167	4.58724		7.98167	4.58724		7.98167	4.58724		7.98167	4.58724		7.98167	4.58724		7.98167	4.58724		7.98167	4.58724		7.98167	4.58724		7.98167	4.58724		7.98167	4.58724		7.98167	4.58724		7.98167	4.58724		7.98167	4.58724
25		7.9728	4.58001		7.9728	4.58001		7.9728	4.58001		7.9728	4.58001		7.9728	4.58001		7.9728	4.58001		7.9728	4.58001		7.9728	4.58001		7.9728	4.58001		7.9728	4.58001		7.9728	4.58001		7.9728	4.58001		7.9728	4.58001		7.9728	4.58001		7.9728	4.58001		7.9728	4.58001
26		7.9629	4.57213		7.9629	4.57213		7.9629	4.57213		7.9629	4.57213		7.9629	4.57213		7.9629	4.57213		7.96451	4.57318		7.96451	4.57318		7.96451	4.57318		7.96451	4.57318		7.96451	4.57318		7.96451	4.57318		7.96451	4.57318		7.96451	4.57318		7.96451	4.57318		7.96451	4.57318
27		7.9524	4.56387		7.9524	4.56387		7.9524	4.56387		7.9524	4.56387		7.9524	4.56387		7.9524	4.56387		7.95618	4.56632		7.95618	4.56632		7.95618	4.56632		7.95618	4.56632		7.95618	4.56632		7.95618	4.56632		7.95618	4.56632		7.95618	4.56632		7.95618	4.56632		7.95618	4.56632
28		7.94113	4.55512		7.94113	4.55512		7.94113	4.55512		7.94113	4.55512		7.94113	4.55512		7.94113	4.55512		7.94782	4.55945		7.94782	4.55945		7.94782	4.55945		7.94782	4.55945		7.94782	4.55945		7.94782	4.55945		7.94782	4.55945		7.94782	4.55945		7.94782	4.55945		7.94782	4.55945
29		7.92883	4.54571		7.92883	4.54571		7.92883	4.54571		7.92883	4.54571		7.92883	4.54571		7.92883	4.54571		7.93941	4.55255		7.93941	4.55255		7.93941	4.55255		7.93941	4.55255		7.93941	4.55255		7.93941	4.55255		7.93941	4.55255		7.93941	4.55255		7.93941	4.55255		7.93941	4.55255
30		7.91582	4.53584		7.91582	4.53584		7.91582	4.53584		7.91582	4.53584		7.91582	4.53584		7.91582	4.53584		7.93162	4.54607		7.93162	4.54607		7.93162	4.54607		7.93162	4.54607		7.93162	4.54607		7.93162	4.54607		7.93162	4.54607		7.93162	4.54607		7.93162	4.54607		7.93162	4.54607
31		7.90098	4.5248		7.90098	4.5248		7.90098	4.5248		7.90098	4.5248		7.90098	4.5248		7.90098	4.5248		7.92222	4.53854		7.92222	4.53854		7.92222	4.53854		7.92222	4.53854		7.92222	4.53854		7.92222	4.53854		7.9238	4.53957		7.9238	4.53957		7.9238	4.53957		7.9238	4.53957
32		7.88436	4.51262		7.88436	4.51262		7.88436	4.51262		7.88436	4.51262		7.88436	4.51262		7.88436	4.51262		7.91289	4.53108		7.91289	4.53108		7.91289	4.53108		7.91289	4.53108		7.91289	4.53108		7.91289	4.53108		7.91661	4.53348		7.91661	4.53348		7.91661	4.53348		7.91661	4.53348
33		7.86451	4.49835		7.86451	4.49835		7.86451	4.49835		7.86451	4.49835		7.86451	4.49835		7.86451	4.49835		7.90282	4.52314		7.90282	4.52314		7.90282	4.52314		7.90282	4.52314		7.90282	4.52314		7.90282	4.52314		7.90938	4.52739		7.90938	4.52739		7.90938	4.52739		7.90938	4.52739
34		7.84032	4.48128		7.84032	4.48128		7.84032	4.48128		7.84032	4.48128		7.84032	4.48128		7.84032	4.48128		7.89174	4.51456		7.89174	4.51456		7.89174	4.51456		7.89174	4.51456		7.89174	4.51456		7.89174	4.51456		7.90214	4.52128		7.90214	4.52128		7.90214	4.52128		7.90214	4.52128
35		7.81098	4.46088		7.81098	4.46088		7.81098	4.46088		7.81098	4.46088		7.81098	4.46088		7.81098	4.46088		7.87999	4.50554		7.87999	4.50554		7.87999	4.50554		7.87999	4.50554		7.87999	4.50554		7.87999	4.50554		7.89553	4.51559		7.89553	4.51559		7.89553	4.51559		7.89553	4.51559
36		7.89344	4.51287		7.63264	4.25087		7.40684	4.02137		7.21604	3.82437		7.06024	3.65987		6.78704	3.32687		7.86645	4.49538		7.86645	4.49538		7.86645	4.49538		7.86645	4.49538		7.86645	4.49538		7.86645	4.49538		7.88734	4.50889		7.88734	4.50889		7.88734	4.50889		7.88734	4.50889
37		7.88678	4.50716		7.62598	4.24516		7.40018	4.01566		7.20938	3.81866		7.05358	3.65416		6.78038	3.32116		7.85053	4.48369		7.85053	4.48369		7.85053	4.48369		7.85053	4.48369		7.85053	4.48369		7.85053	4.48369		7.87861	4.50183		7.87861	4.50183		7.87861	4.50183		7.87861	4.50183
38		7.88076	4.50187		7.61996	4.23987		7.39416	4.01037		7.20336	3.81337		7.04756	3.64887		6.77436	3.31587		7.83207	4.47036		7.83207	4.47036		7.83207	4.47036		7.83207	4.47036		7.83207	4.47036		7.83207	4.47036		7.86979	4.49474		7.86979	4.49474		7.86979	4.49474		7.86979	4.49474
39		7.87474	4.49658		7.61394	4.23458		7.38814	4.00508		7.19734	3.80808		7.04154	3.64358		6.76834	3.31058		7.80934	4.45427		7.80934	4.45427		7.80934	4.45427		7.80934	4.45427		7.80934	4.45427		7.80934	4.45427		7.86	4.48702		7.86	4.48702		7.86	4.48702		7.86	4.48702
40		7.86869	4.49128		7.60789	4.22928		7.38209	3.99978		7.19129	3.80278		7.03549	3.63828		6.76229	3.30528		7.7809	4.43449		7.7809	4.43449		7.7809	4.43449		7.7809	4.43449		7.7809	4.43449		7.7809	4.43449		7.8489	4.47845		7.8489	4.47845		7.8489	4.47845		7.8489	4.47845
41		7.8633	4.48641		7.6025	4.22441		7.3767	3.99491		7.1859	3.79791		7.0301	3.63341		6.7569	3.30041		7.8633	4.48641		7.6025	4.22441		7.3767	3.99491		7.1859	3.79791		7.0301	3.63341		6.7569	3.30041		7.8367	4.46919		7.8367	4.46919		7.8367	4.46919		7.8367	4.46919
42		7.8579	4.48154		7.5971	4.21954		7.3713	3.99004		7.1805	3.79304		7.0247	3.62854		6.7515	3.29554		7.8579	4.48154		7.5971	4.21954		7.3713	3.99004		7.1805	3.79304		7.0247	3.62854		6.7515	3.29554		7.82214	4.45841		7.82214	4.45841		7.82214	4.45841		7.82214	4.45841
43		7.85248	4.47666		7.59168	4.21466		7.36588	3.98516		7.17508	3.78816		7.01928	3.62366		6.74608	3.29066		7.85248	4.47666		7.59168	4.21466		7.36588	3.98516		7.17508	3.78816		7.01928	3.62366		6.74608	3.29066		7.80444	4.4456		7.80444	4.4456		7.80444	4.4456		7.80444	4.4456
44		7.84706	4.47178		7.58626	4.20978		7.36046	3.98028		7.16966	3.78328		7.01386	3.61878		6.74066	3.28578		7.84706	4.47178		7.58626	4.20978		7.36046	3.98028		7.16966	3.78328		7.01386	3.61878		6.74066	3.28578		7.78252	4.43007		7.78252	4.43007		7.78252	4.43007		7.78252	4.43007
45		7.84229	4.46734		7.58149	4.20534		7.35569	3.97584		7.16489	3.77884		7.00909	3.61434		6.73589	3.28134		7.84229	4.46734		7.58149	4.20534		7.35569	3.97584		7.16489	3.77884		7.00909	3.61434		6.73589	3.28134		7.7556	4.41131		7.7556	4.41131		7.7556	4.41131		7.7556	4.41131
46		7.83752	4.46289		7.57672	4.20089		7.35092	3.97139		7.16012	3.77439		7.00432	3.60989		6.73112	3.27689		7.83752	4.46289		7.57672	4.20089		7.35092	3.97139		7.16012	3.77439		7.00432	3.60989		6.73112	3.27689		7.83752	4.46289		7.57672	4.20089		7.35092	3.97139		7.16012	3.77439
47		7.8334	4.45887		7.5726	4.19687		7.3468	3.96737		7.156	3.77037		7.0002	3.60587		6.727	3.27287		7.8334	4.45887		7.5726	4.19687		7.3468	3.96737		7.156	3.77037		7.0002	3.60587		6.727	3.27287		7.8334	4.45887		7.5726	4.19687		7.3468	3.96737		7.156	3.77037
48		7.82927	4.45485		7.56847	4.19285		7.34267	3.96335		7.15187	3.76635		6.99607	3.60185		6.72287	3.26885		7.82927	4.45485		7.56847	4.19285		7.34267	3.96335		7.15187	3.76635		6.99607	3.60185		6.72287	3.26885		7.82927	4.45485		7.56847	4.19285		7.34267	3.96335		7.15187	3.76635
49		7.82514	4.45083		7.56434	4.18883		7.33854	3.95933		7.14774	3.76233		6.99194	3.59783		6.71874	3.26483		7.82514	4.45083		7.56434	4.18883		7.33854	3.95933		7.14774	3.76233		6.99194	3.59783		6.71874	3.26483		7.82514	4.45083		7.56434	4.18883		7.33854	3.95933		7.14774	3.76233
50		7.821	4.44681		7.5602	4.18481		7.3344	3.95531		7.1436	3.75831		6.9878	3.59381		6.7146	3.26081		7.821	4.44681		7.5602	4.18481		7.3344	3.95531		7.1436	3.75831		6.9878	3.59381		6.7146	3.26081		7.821	4.44681		7.5602	4.18481		7.3344	3.95531		7.1436	3.75831
51		7.81753	4.44323		7.55673	4.18123		7.33093	3.95173		7.14013	3.75473		6.98433	3.59023		6.71113	3.25723		7.81753	4.44323		7.55673	4.18123		7.33093	3.95173		7.14013	3.75473		6.98433	3.59023		6.71113	3.25723		7.81753	4.44323		7.55673	4.18123		7.33093	3.95173		7.14013	3.75473
52		7.81404	4.43964		7.55324	4.17764		7.32744	3.94814		7.13664	3.75114		6.98084	3.58664		6.70764	3.25364		7.81404	4.43964		7.55324	4.17764		7.32744	3.94814		7.13664	3.75114		6.98084	3.58664		6.70764	3.25364		7.81404	4.43964		7.55324	4.17764		7.32744	3.94814		7.13664	3.75114
53		7.81056	4.43605		7.54976	4.17405		7.32396	3.94455		7.13316	3.74755		6.97736	3.58305		6.70416	3.25005		7.81056	4.43605		7.54976	4.17405		7.32396	3.94455		7.13316	3.74755		6.97736	3.58305		6.70416	3.25005		7.81056	4.43605		7.54976	4.17405		7.32396	3.94455		7.13316	3.74755
54		7.80707	4.43247		7.54627	4.17047		7.32047	3.94097		7.12967	3.74397		6.97387	3.57947		6.70067	3.24647		7.80707	4.43247		7.54627	4.17047		7.32047	3.94097		7.12967	3.74397		6.97387	3.57947		6.70067	3.24647		7.80707	4.43247		7.54627	4.17047		7.32047	3.94097		7.12967	3.74397
55		7.80423	4.42931		7.54343	4.16731		7.31763	3.93781		7.12683	3.74081		6.97103	3.57631		6.69783	3.24331		7.80423	4.42931		7.54343	4.16731		7.31763	3.93781		7.12683	3.74081		6.97103	3.57631		6.69783	3.24331		7.80423	4.42931		7.54343	4.16731		7.31763	3.93781		7.12683	3.74081
56		7.8014	4.42616		7.5406	4.16416		7.3148	3.93466		7.124	3.73766		6.9682	3.57316		6.695	3.24016		7.8014	4.42616		7.5406	4.16416		7.3148	3.93466		7.124	3.73766		6.9682	3.57316		6.695	3.24016		7.8014	4.42616		7.5406	4.16416		7.3148	3.93466		7.124	3.73766
57		7.79922	4.42344		7.53842	4.16144		7.31262	3.93194		7.12182	3.73494		6.96602	3.57044		6.69282	3.23744		7.79922	4.42344		7.53842	4.16144		7.31262	3.93194		7.12182	3.73494		6.96602	3.57044		6.69282	3.23744		7.79922	4.42344		7.53842	4.16144		7.31262	3.93194		7.12182	3.73494
58		7.79638	4.42029		7.53558	4.15829		7.30978	3.92879		7.11898	3.73179		6.96318	3.56729		6.68998	3.23429		7.79638	4.42029		7.53558	4.15829		7.30978	3.92879		7.11898	3.73179		6.96318	3.56729		6.68998	3.23429		7.79638	4.42029		7.53558	4.15829		7.30978	3.92879		7.11898	3.73179
59		7.7942	4.41757		7.5334	4.15557		7.3076	3.92607		7.1168	3.72907		6.961	3.56457		6.6878	3.23157		7.7942	4.41757		7.5334	4.15557		7.3076	3.92607		7.1168	3.72907		6.961	3.56457		6.6878	3.23157		7.7942	4.41757		7.5334	4.15557		7.3076	3.92607		7.1168	3.72907
60		7.79201	4.41486		7.53121	4.15286		7.30541	3.92336		7.11461	3.72636		6.95881	3.56186		6.68561	3.22886		7.79201	4.41486		7.53121	4.15286		7.30541	3.92336		7.11461	3.72636		6.95881	3.56186		6.68561	3.22886		7.79201	4.41486		7.53121	4.15286		7.30541	3.92336		7.11461	3.72636
61		7.79048	4.41257		7.52968	4.15057		7.30388	3.92107		7.11308	3.72407		6.95728	3.55957		6.68408	3.22657		7.79048	4.41257		7.52968	4.15057		7.30388	3.92107		7.11308	3.72407		6.95728	3.55957		6.68408	3.22657		7.79048	4.41257		7.52968	4.15057		7.30388	3.92107		7.11308	3.72407
62		7.78829	4.40986		7.52749	4.14786		7.30169	3.91836		7.11089	3.72136		6.95509	3.55686		6.68189	3.22386		7.78829	4.40986		7.52749	4.14786		7.30169	3.91836		7.11089	3.72136		6.95509	3.55686		6.68189	3.22386		7.78829	4.40986		7.52749	4.14786		7.30169	3.91836		7.11089	3.72136
63		7.78676	4.40757		7.52596	4.14557		7.30016	3.91607		7.10936	3.71907		6.95356	3.55457		6.68036	3.22157		7.78676	4.40757		7.52596	4.14557		7.30016	3.91607		7.10936	3.71907		6.95356	3.55457		6.68036	3.22157		7.78676	4.40757		7.52596	4.14557		7.30016	3.91607		7.10936	3.71907
64		7.78522	4.40529		7.52442	4.14329		7.29862	3.91379		7.10782	3.71679		6.95202	3.55229		6.67882	3.21929		7.78522	4.40529		7.52442	4.14329		7.29862	3.91379		7.10782	3.71679		6.95202	3.55229		6.67882	3.21929		7.78522	4.40529		7.52442	4.14329		7.29862	3.91379		7.10782	3.71679
65		7.78435	4.40344		7.52355	4.14144		7.29775	3.91194		7.10695	3.71494		6.95115	3.55044		6.67795	3.21744		7.78435	4.40344		7.52355	4.14144		7.29775	3.91194		7.10695	3.71494		6.95115	3.55044		6.67795	3.21744		7.78435	4.40344		7.52355	4.14144		7.29775	3.91194		7.10695	3.71494
66		7.7828	4.40116		7.522	4.13916		7.2962	3.90966		7.1054	3.71266		6.9496	3.54816		6.6764	3.21516		7.7828	4.40116		7.522	4.13916		7.2962	3.90966		7.1054	3.71266		6.9496	3.54816		6.6764	3.21516		7.7828	4.40116		7.522	4.13916		7.2962	3.90966		7.1054	3.71266
67		7.78192	4.39931		7.52112	4.13731		7.29532	3.90781		7.10452	3.71081		6.94872	3.54631		6.67552	3.21331		7.78192	4.39931		7.52112	4.13731		7.29532	3.90781		7.10452	3.71081		6.94872	3.54631		6.67552	3.21331		7.78192	4.39931		7.52112	4.13731		7.29532	3.90781		7.10452	3.71081
68		7.78103	4.39746		7.52023	4.13546		7.29443	3.90596		7.10363	3.70896		6.94783	3.54446		6.67463	3.21146		7.78103	4.39746		7.52023	4.13546		7.29443	3.90596		7.10363	3.70896		6.94783	3.54446		6.67463	3.21146		7.78103	4.39746		7.52023	4.13546		7.29443	3.90596		7.10363	3.70896
69		7.7808	4.39605		7.52	4.13405		7.2942	3.90455		7.1034	3.70755		6.9476	3.54305		6.6744	3.21005		7.7808	4.39605		7.52	4.13405		7.2942	3.90455		7.1034	3.70755		6.9476	3.54305		6.6744	3.21005		7.7808	4.39605		7.52	4.13405		7.2942	3.90455		7.1034	3.70755
70		7.77991	4.3942		7.51911	4.1322		7.29331	3.9027		7.10251	3.7057		6.94671	3.5412		6.67351	3.2082		7.77991	4.3942		7.51911	4.1322		7.29331	3.9027		7.10251	3.7057		6.94671	3.5412		6.67351	3.2082		7.77991	4.3942		7.51911	4.1322		7.29331	3.9027		7.10251	3.7057
71		7.77968	4.39279		7.51888	4.13079		7.29308	3.90129		7.10228	3.70429		6.94648	3.53979		6.67328	3.20679		7.77968	4.39279		7.51888	4.13079		7.29308	3.90129		7.10228	3.70429		6.94648	3.53979		6.67328	3.20679		7.77968	4.39279		7.51888	4.13079		7.29308	3.90129		7.10228	3.70429
72		7.77944	4.39137		7.51864	4.12937		7.29284	3.89987		7.10204	3.70287		6.94624	3.53837		6.67304	3.20537		7.77944	4.39137		7.51864	4.12937		7.29284	3.89987		7.10204	3.70287		6.94624	3.53837		6.67304	3.20537		7.77944	4.39137		7.51864	4.12937		7.29284	3.89987		7.10204	3.70287
73		7.77919	4.38996		7.51839	4.12796		7.29259	3.89846		7.10179	3.70146		6.94599	3.53696		6.67279	3.20396		7.77919	4.38996		7.51839	4.12796		7.29259	3.89846		7.10179	3.70146		6.94599	3.53696		6.67279	3.20396		7.77919	4.38996		7.51839	4.12796		7.29259	3.89846		7.10179	3.70146
74		7.77961	4.38898		7.51881	4.12698		7.29301	3.89748		7.10221	3.70048		6.94641	3.53598		6.67321	3.20298		7.77961	4.38898		7.51881	4.12698		7.29301	3.89748		7.10221	3.70048		6.94641	3.53598		6.67321	3.20298		7.77961	4.38898		7.51881	4.12698		7.29301	3.89748		7.10221	3.70048
75		7.77936	4.38757		7.51856	4.12557		7.29276	3.89607		7.10196	3.69907		6.94616	3.53457		6.67296	3.20157		7.77936	4.38757		7.51856	4.12557		7.29276	3.89607		7.10196	3.69907		6.94616	3.53457		6.67296	3.20157		7.77936	4.38757		7.51856	4.12557		7.29276	3.89607		7.10196	3.69907
76		7.77976	4.38658		7.51896	4.12458		7.29316	3.89508		7.10236	3.69808		6.94656	3.53358		6.67336	3.20058		7.77976	4.38658		7.51896	4.12458		7.29316	3.89508		7.10236	3.69808		6.94656	3.53358		6.67336	3.20058		7.77976	4.38658		7.51896	4.12458		7.29316	3.89508		7.10236	3.69808
77		7.78017	4.3856		7.51937	4.1236		7.29357	3.8941		7.10277	3.6971		6.94697	3.5326		6.67377	3.1996		7.78017	4.3856		7.51937	4.1236		7.29357	3.8941		7.10277	3.6971		6.94697	3.5326		6.67377	3.1996		7.78017	4.3856		7.51937	4.1236		7.29357	3.8941		7.10277	3.6971
78		7.78122	4.38505		7.52042	4.12305		7.29462	3.89355		7.10382	3.69655		6.94802	3.53205		6.67482	3.19905		7.78122	4.38505		7.52042	4.12305		7.29462	3.89355		7.10382	3.69655		6.94802	3.53205		6.67482	3.19905		7.78122	4.38505		7.52042	4.12305		7.29462	3.89355		7.10382	3.69655
79		7.78162	4.38407		7.52082	4.12207		7.29502	3.89257		7.10422	3.69557		6.94842	3.53107		6.67522	3.19807		7.78162	4.38407		7.52082	4.12207		7.29502	3.89257		7.10422	3.69557		6.94842	3.53107		6.67522	3.19807		7.78162	4.38407		7.52082	4.12207		7.29502	3.89257		7.10422	3.69557
80		7.78267	4.38352		7.52187	4.12152		7.29607	3.89202		7.10527	3.69502		6.94947	3.53052		6.67627	3.19752		7.78267	4.38352		7.52187	4.12152		7.29607	3.89202		7.10527	3.69502		6.94947	3.53052		6.67627	3.19752		7.78267	4.38352		7.52187	4.12152		7.29607	3.89202		7.10527	3.69502
81		7.79993	4.38924		7.53913	4.12724		7.31333	3.89774		7.12253	3.70074		6.96673	3.53624		6.69353	3.20324		7.79993	4.38924		7.53913	4.12724		7.31333	3.89774		7.12253	3.70074		6.96673	3.53624		6.69353	3.20324		7.79993	4.38924		7.53913	4.12724		7.31333	3.89774		7.12253	3.70074
82		7.80099	4.38871		7.54019	4.12671		7.31439	3.89721		7.12359	3.70021		6.96779	3.53571		6.69459	3.20271		7.80099	4.38871		7.54019	4.12671		7.31439	3.89721		7.12359	3.70021		6.96779	3.53571		6.69459	3.20271		7.80099	4.38871		7.54019	4.12671		7.31439	3.89721		7.12359	3.70021
83		7.80205	4.38817		7.54125	4.12617		7.31545	3.89667		7.12465	3.69967		6.96885	3.53517		6.69565	3.20217		7.80205	4.38817		7.54125	4.12617		7.31545	3.89667		7.12465	3.69967		6.96885	3.53517		6.69565	3.20217		7.80205	4.38817		7.54125	4.12617		7.31545	3.89667		7.12465	3.69967
84		7.8031	4.38764		7.5423	4.12564		7.3165	3.89614		7.1257	3.69914		6.9699	3.53464		6.6967	3.20164		7.8031	4.38764		7.5423	4.12564		7.3165	3.89614		7.1257	3.69914		6.9699	3.53464		6.6967	3.20164		7.8031	4.38764		7.5423	4.12564		7.3165	3.89614		7.1257	3.69914
85		7.8048	4.38753		7.544	4.12553		7.3182	3.89603		7.1274	3.69903		6.9716	3.53453		6.6984	3.20153		7.8048	4.38753		7.544	4.12553		7.3182	3.89603		7.1274	3.69903		6.9716	3.53453		6.6984	3.20153		7.8048	4.38753		7.544	4.12553		7.3182	3.89603		7.1274	3.69903
86		7.80649	4.38742		7.54569	4.12542		7.31989	3.89592		7.12909	3.69892		6.97329	3.53442		6.70009	3.20142		7.80649	4.38742		7.54569	4.12542		7.31989	3.89592		7.12909	3.69892		6.97329	3.53442		6.70009	3.20142		7.80649	4.38742		7.54569	4.12542		7.31989	3.89592		7.12909	3.69892
87		7.80818	4.38731		7.54738	4.12531		7.32158	3.89581		7.13078	3.69881		6.97498	3.53431		6.70178	3.20131		7.80818	4.38731		7.54738	4.12531		7.32158	3.89581		7.13078	3.69881		6.97498	3.53431		6.70178	3.20131		7.80818	4.38731		7.54738	4.12531		7.32158	3.89581		7.13078	3.69881
88		7.80987	4.3872		7.54907	4.1252		7.32327	3.8957		7.13247	3.6987		6.97667	3.5342		6.70347	3.2012		7.80987	4.3872		7.54907	4.1252		7.32327	3.8957		7.13247	3.6987		6.97667	3.5342		6.70347	3.2012		7.80987	4.3872		7.54907	4.1252		7.32327	3.8957		7.13247	3.6987
89		7.81155	4.38709		7.55075	4.12509		7.32495	3.89559		7.13415	3.69859		6.97835	3.53409		6.70515	3.20109		7.81155	4.38709		7.55075	4.12509		7.32495	3.89559		7.13415	3.69859		6.97835	3.53409		6.70515	3.20109		7.81155	4.38709		7.55075	4.12509		7.32495	3.89559		7.13415	3.69859
90		7.81322	4.38698		7.55242	4.12498		7.32662	3.89548		7.13582	3.69848		6.98002	3.53398		6.70682	3.20098		7.81322	4.38698		7.55242	4.12498		7.32662	3.89548		7.13582	3.69848		6.98002	3.53398		6.70682	3.20098		7.81322	4.38698		7.55242	4.12498		7.32662	3.89548		7.13582	3.69848
91		7.81554	4.3873		7.55474	4.1253		7.32894	3.8958		7.13814	3.6988		6.98234	3.5343		6.70914	3.2013		7.81554	4.3873		7.55474	4.1253		7.32894	3.8958		7.13814	3.6988		6.98234	3.5343		6.70914	3.2013		7.81554	4.3873		7.55474	4.1253		7.32894	3.8958		7.13814	3.6988
92		7.81721	4.38718		7.55641	4.12518		7.33061	3.89568		7.13981	3.69868		6.98401	3.53418		6.71081	3.20118		7.81721	4.38718		7.55641	4.12518		7.33061	3.89568		7.13981	3.69868		6.98401	3.53418		6.71081	3.20118		7.81721	4.38718		7.55641	4.12518		7.33061	3.89568		7.13981	3.69868
93		7.81952	4.3875		7.55872	4.1255		7.33292	3.896		7.14212	3.699		6.98632	3.5345		6.71312	3.2015		7.81952	4.3875		7.55872	4.1255		7.33292	3.896		7.14212	3.699		6.98632	3.5345		6.71312	3.2015		7.81952	4.3875		7.55872	4.1255		7.33292	3.896		7.14212	3.699
94		7.82182	4.38781		7.56102	4.12581		7.33522	3.89631		7.14442	3.69931		6.98862	3.53481		6.71542	3.20181		7.82182	4.38781		7.56102	4.12581		7.33522	3.89631		7.14442	3.69931		6.98862	3.53481		6.71542	3.20181		7.82182	4.38781		7.56102	4.12581		7.33522	3.89631		7.14442	3.69931
95		7.82412	4.38812		7.56332	4.12612		7.33752	3.89662		7.14672	3.69962		6.99092	3.53512		6.71772	3.20212		7.82412	4.38812		7.56332	4.12612		7.33752	3.89662		7.14672	3.69962		6.99092	3.53512		6.71772	3.20212		7.82412	4.38812		7.56332	4.12612		7.33752	3.89662		7.14672	3.69962
96		7.82706	4.38885		7.56626	4.12685		7.34046	3.89735		7.14966	3.70035		6.99386	3.53585		6.72066	3.20285		7.82706	4.38885		7.56626	4.12685		7.34046	3.89735		7.14966	3.70035		6.99386	3.53585		6.72066	3.20285		7.82706	4.38885		7.56626	4.12685		7.34046	3.89735		7.14966	3.70035
97		7.82935	4.38916		7.56855	4.12716		7.34275	3.89766		7.15195	3.70066		6.99615	3.53616		6.72295	3.20316		7.82935	4.38916		7.56855	4.12716		7.34275	3.89766		7.15195	3.70066		6.99615	3.53616		6.72295	3.20316		7.82935	4.38916		7.56855	4.12716		7.34275	3.89766		7.15195	3.70066
98		7.83228	4.38989		7.57148	4.12789		7.34568	3.89839		7.15488	3.70139		6.99908	3.53689		6.72588	3.20389		7.83228	4.38989		7.57148	4.12789		7.34568	3.89839		7.15488	3.70139		6.99908	3.53689		6.72588	3.20389		7.83228	4.38989		7.57148	4.12789		7.34568	3.89839		7.15488	3.70139
99		7.83456	4.3902		7.57376	4.1282		7.34796	3.8987		7.15716	3.7017		7.00136	3.5372		6.72816	3.2042		7.83456	4.3902		7.57376	4.1282		7.34796	3.8987		7.15716	3.7017		7.00136	3.5372		6.72816	3.2042		7.83456	4.3902		7.57376	4.1282		7.34796	3.8987		7.15716	3.7017
100		7.83748	4.39093		7.57668	4.12893		7.35088	3.89943		7.16008	3.70243		7.00428	3.53793		6.73108	3.20493		7.83748	4.39093		7.57668	4.12893		7.35088	3.89943		7.16008	3.70243		7.00428	3.53793		6.73108	3.20493		7.83748	4.39093		7.57668	4.12893		7.35088	3.89943		7.16008	3.70243
101		7.84039	4.39166		7.57959	4.12966		7.35379	3.90016		7.16299	3.70316		7.00719	3.53866		6.73399	3.20566		7.84039	4.39166		7.57959	4.12966		7.35379	3.90016		7.16299	3.70316		7.00719	3.53866		6.73399	3.20566		7.84039	4.39166		7.57959	4.12966		7.35379	3.90016		7.16299	3.70316
102		7.8433	4.39238		7.5825	4.13038		7.3567	3.90088		7.1659	3.70388		7.0101	3.53938		6.7369	3.20638		7.8433	4.39238		7.5825	4.13038		7.3567	3.90088		7.1659	3.70388		7.0101	3.53938		6.7369	3.20638		7.8433	4.39238		7.5825	4.13038		7.3567	3.90088		7.1659	3.70388
103		7.8462	4.39311		7.5854	4.13111		7.3596	3.90161		7.1688	3.70461		7.013	3.54011		6.7398	3.20711		7.8462	4.39311		7.5854	4.13111		7.3596	3.90161		7.1688	3.70461		7.013	3.54011		6.7398	3.20711		7.8462	4.39311		7.5854	4.13111		7.3596	3.90161		7.1688	3.70461
104		7.84909	4.39383		7.58829	4.13183		7.36249	3.90233		7.17169	3.70533		7.01589	3.54083		6.74269	3.20783		7.84909	4.39383		7.58829	4.13183		7.36249	3.90233		7.17169	3.70533		7.01589	3.54083		6.74269	3.20783		7.84909	4.39383		7.58829	4.13183		7.36249	3.90233		7.17169	3.70533
105		7.85198	4.39455		7.59118	4.13255		7.36538	3.90305		7.17458	3.70605		7.01878	3.54155		6.74558	3.20855		7.85198	4.39455		7.59118	4.13255		7.36538	3.90305		7.17458	3.70605		7.01878	3.54155		6.74558	3.20855		7.85198	4.39455		7.59118	4.13255		7.36538	3.90305		7.17458	3.70605
106		7.85551	4.3957		7.59471	4.1337		7.36891	3.9042		7.17811	3.7072		7.02231	3.5427		6.74911	3.2097		7.85551	4.3957		7.59471	4.1337		7.36891	3.9042		7.17811	3.7072		7.02231	3.5427		6.74911	3.2097		7.85551	4.3957		7.59471	4.1337		7.36891	3.9042		7.17811	3.7072
107		7.85839	4.39642		7.59759	4.13442		7.37179	3.90492		7.18099	3.70792		7.02519	3.54342		6.75199	3.21042		7.85839	4.39642		7.59759	4.13442		7.37179	3.90492		7.18099	3.70792		7.02519	3.54342		6.75199	3.21042		7.85839	4.39642		7.59759	4.13442		7.37179	3.90492		7.18099	3.70792
108		7.86191	4.39756		7.60111	4.13556		7.37531	3.90606		7.18451	3.70906		7.02871	3.54456		6.75551	3.21156		7.86191	4.39756		7.60111	4.13556		7.37531	3.90606		7.18451	3.70906		7.02871	3.54456		6.75551	3.21156		7.86191	4.39756		7.60111	4.13556		7.37531	3.90606		7.18451	3.70906
109		7.86478	4.39828		7.60398	4.13628		7.37818	3.90678		7.18738	3.70978		7.03158	3.54528		6.75838	3.21228		7.86478	4.39828		7.60398	4.13628		7.37818	3.90678		7.18738	3.70978		7.03158	3.54528		6.75838	3.21228		7.86478	4.39828		7.60398	4.13628		7.37818	3.90678		7.18738	3.70978
110		7.86828	4.39942		7.60748	4.13742		7.38168	3.90792		7.19088	3.71092		7.03508	3.54642		6.76188	3.21342		7.86828	4.39942		7.60748	4.13742		7.38168	3.90792		7.19088	3.71092		7.03508	3.54642		6.76188	3.21342		7.86828	4.39942		7.60748	4.13742		7.38168	3.90792		7.19088	3.71092
111		7.87178	4.40056		7.61098	4.13856		7.38518	3.90906		7.19438	3.71206		7.03858	3.54756		6.76538	3.21456		7.87178	4.40056		7.61098	4.13856		7.38518	3.90906		7.19438	3.71206		7.03858	3.54756		6.76538	3.21456		7.87178	4.40056		7.61098	4.13856		7.38518	3.90906		7.19438	3.71206
112		7.87528	4.4017		7.61448	4.1397		7.38868	3.9102		7.19788	3.7132		7.04208	3.5487		6.76888	3.2157		7.87528	4.4017		7.61448	4.1397		7.38868	3.9102		7.19788	3.7132		7.04208	3.5487		6.76888	3.2157		7.87528	4.4017		7.61448	4.1397		7.38868	3.9102		7.19788	3.7132
113		7.87876	4.40283		7.61796	4.14083		7.39216	3.91133		7.20136	3.71433		7.04556	3.54983		6.77236	3.21683		7.87876	4.40283		7.61796	4.14083		7.39216	3.91133		7.20136	3.71433		7.04556	3.54983		6.77236	3.21683		7.87876	4.40283		7.61796	4.14083		7.39216	3.91133		7.20136	3.71433
114		7.88225	4.40396		7.62145	4.14196		7.39565	3.91246		7.20485	3.71546		7.04905	3.55096		6.77585	3.21796		7.88225	4.40396		7.62145	4.14196		7.39565	3.91246		7.20485	3.71546		7.04905	3.55096		6.77585	3.21796		7.88225	4.40396		7.62145	4.14196		7.39565	3.91246		7.20485	3.71546
115		7.88572	4.4051		7.62492	4.1431		7.39912	3.9136		7.20832	3.7166		7.05252	3.5521		6.77932	3.2191		7.88572	4.4051		7.62492	4.1431		7.39912	3.9136		7.20832	3.7166		7.05252	3.5521		6.77932	3.2191		7.88572	4.4051		7.62492	4.1431		7.39912	3.9136		7.20832	3.7166
116		7.88919	4.40623		7.62839	4.14423		7.40259	3.91473		7.21179	3.71773		7.05599	3.55323		6.78279	3.22023		7.88919	4.40623		7.62839	4.14423		7.40259	3.91473		7.21179	3.71773		7.05599	3.55323		6.78279	3.22023		7.88919	4.40623		7.62839	4.14423		7.40259	3.91473		7.21179	3.71773
117		7.89266	4.40736		7.63186	4.14536		7.40606	3.91586		7.21526	3.71886		7.05946	3.55436		6.78626	3.22136		7.89266	4.40736		7.63186	4.14536		7.40606	3.91586		7.21526	3.71886		7.05946	3.55436		6.78626	3.22136		7.89266	4.40736		7.63186	4.14536		7.40606	3.91586		7.21526	3.71886
118		7.89612	4.40848		7.63532	4.14648		7.40952	3.91698		7.21872	3.71998		7.06292	3.55548		6.78972	3.22248		7.89612	4.40848		7.63532	4.14648		7.40952	3.91698		7.21872	3.71998		7.06292	3.55548		6.78972	3.22248		7.89612	4.40848		7.63532	4.14648		7.40952	3.91698		7.21872	3.71998
119		7.90021	4.41003		7.63941	4.14803		7.41361	3.91853		7.22281	3.72153		7.06701	3.55703		6.79381	3.22403		7.90021	4.41003		7.63941	4.14803		7.41361	3.91853		7.22281	3.72153		7.06701	3.55703		6.79381	3.22403		7.90021	4.41003		7.63941	4.14803		7.41361	3.91853		7.22281	3.72153
120		7.90366	4.41116		7.64286	4.14916		7.41706	3.91966		7.22626	3.72266		7.07046	3.55816		6.79726	3.22516		7.90366	4.41116		7.64286	4.14916		7.41706	3.91966		7.22626	3.72266		7.07046	3.55816		6.79726	3.22516		7.90366	4.41116		7.64286	4.14916		7.41706	3.91966		7.22626	3.72266
[truncated: 52 more columns]

## Sheet: Tab 3. Permanent stations
ABAH		LAB at 55 km																		LAB at 60 km																		LAB at 65 km
		no melt			melt 0.5%			melt 1%			melt 1.5%			melt 2%			melt 4%			no melt			melt 0.5%			melt 1%			melt 1.5%			melt 2%			melt 4%			no melt			melt 0.5%			melt 1%			melt 1.5%
Depth		Vp	Vs		Vp	Vs		Vp	Vs		Vp	Vs		Vp	Vs		Vp	Vs		Vp	Vs		Vp	Vs		Vp	Vs		Vp	Vs		Vp	Vs		Vp	Vs		Vp	Vs		Vp	Vs		Vp	Vs		Vp	Vs
1		3.155	1.785		3.155	1.785		3.155	1.785		3.155	1.785		3.155	1.785		3.155	1.785		3.155	1.785		3.155	1.785		3.155	1.785		3.155	1.785		3.155	1.785		3.155	1.785		3.155	1.785		3.155	1.785		3.155	1.785		3.155	1.785
2		4.57311	2.69236		4.57311	2.69236		4.57311	2.69236		4.57311	2.69236		4.57311	2.69236		4.57311	2.69236		4.57311	2.69236		4.57311	2.69236		4.57311	2.69236		4.57311	2.69236		4.57311	2.69236		4.57311	2.69236		4.57311	2.69236		4.57311	2.69236		4.57311	2.69236		4.57311	2.69236
3		5.99122	3.59973		5.99122	3.59973		5.99122	3.59973		5.99122	3.59973		5.99122	3.59973		5.99122	3.59973		5.99122	3.59973		5.99122	3.59973		5.99122	3.59973		5.99122	3.59973		5.99122	3.59973		5.99122	3.59973		5.99122	3.59973		5.99122	3.59973		5.99122	3.59973		5.99122	3.59973
4		6.00083	3.60121		6.00083	3.60121		6.00083	3.60121		6.00083	3.60121		6.00083	3.60121		6.00083	3.60121		6.00083	3.60121		6.00083	3.60121		6.00083	3.60121		6.00083	3.60121		6.00083	3.60121		6.00083	3.60121		6.00083	3.60121		6.00083	3.60121		6.00083	3.60121		6.00083	3.60121
5		6.01045	3.60269		6.01045	3.60269		6.01045	3.60269		6.01045	3.60269		6.01045	3.60269		6.01045	3.60269		6.01045	3.60269		6.01045	3.60269		6.01045	3.60269		6.01045	3.60269		6.01045	3.60269		6.01045	3.60269		6.01045	3.60269		6.01045	3.60269		6.01045	3.60269		6.01045	3.60269
6		6.02007	3.60417		6.02007	3.60417		6.02007	3.60417		6.02007	3.60417		6.02007	3.60417		6.02007	3.60417		6.02007	3.60417		6.02007	3.60417		6.02007	3.60417		6.02007	3.60417		6.02007	3.60417		6.02007	3.60417		6.02007	3.60417		6.02007	3.60417		6.02007	3.60417		6.02007	3.60417
7		6.03623	3.60704		6.03623	3.60704		6.03623	3.60704		6.03623	3.60704		6.03623	3.60704		6.03623	3.60704		6.03623	3.60704		6.03623	3.60704		6.03623	3.60704		6.03623	3.60704		6.03623	3.60704		6.03623	3.60704		6.03623	3.60704		6.03623	3.60704		6.03623	3.60704		6.03623	3.60704
8		6.05239	3.60991		6.05239	3.60991		6.05239	3.60991		6.05239	3.60991		6.05239	3.60991		6.05239	3.60991		6.05239	3.60991		6.05239	3.60991		6.05239	3.60991		6.05239	3.60991		6.05239	3.60991		6.05239	3.60991		6.05239	3.60991		6.05239	3.60991		6.05239	3.60991		6.05239	3.60991
9		6.06855	3.61278		6.06855	3.61278		6.06855	3.61278		6.06855	3.61278		6.06855	3.61278		6.06855	3.61278		6.06855	3.61278		6.06855	3.61278		6.06855	3.61278		6.06855	3.61278		6.06855	3.61278		6.06855	3.61278		6.06855	3.61278		6.06855	3.61278		6.06855	3.61278		6.06855	3.61278
10		6.08471	3.61565		6.08471	3.61565		6.08471	3.61565		6.08471	3.61565		6.08471	3.61565		6.08471	3.61565		6.08471	3.61565		6.08471	3.61565		6.08471	3.61565		6.08471	3.61565		6.08471	3.61565		6.08471	3.61565		6.08471	3.61565		6.08471	3.61565		6.08471	3.61565		6.08471	3.61565
11		6.12269	3.62394		6.12269	3.62394		6.12269	3.62394		6.12269	3.62394		6.12269	3.62394		6.12269	3.62394		6.12269	3.62394		6.12269	3.62394		6.12269	3.62394		6.12269	3.62394		6.12269	3.62394		6.12269	3.62394		6.12269	3.62394		6.12269	3.62394		6.12269	3.62394		6.12269	3.62394
12		6.16067	3.63224		6.16067	3.63224		6.16067	3.63224		6.16067	3.63224		6.16067	3.63224		6.16067	3.63224		6.16067	3.63224		6.16067	3.63224		6.16067	3.63224		6.16067	3.63224		6.16067	3.63224		6.16067	3.63224		6.16067	3.63224		6.16067	3.63224		6.16067	3.63224		6.16067	3.63224
13		6.19865	3.64054		6.19865	3.64054		6.19865	3.64054		6.19865	3.64054		6.19865	3.64054		6.19865	3.64054		6.19865	3.64054		6.19865	3.64054		6.19865	3.64054		6.19865	3.64054		6.19865	3.64054		6.19865	3.64054		6.19865	3.64054		6.19865	3.64054		6.19865	3.64054		6.19865	3.64054
14		6.23663	3.64884		6.23663	3.64884		6.23663	3.64884		6.23663	3.64884		6.23663	3.64884		6.23663	3.64884		6.23663	3.64884		6.23663	3.64884		6.23663	3.64884		6.23663	3.64884		6.23663	3.64884		6.23663	3.64884		6.23663	3.64884		6.23663	3.64884		6.23663	3.64884		6.23663	3.64884
15		6.27461	3.65713		6.27461	3.65713		6.27461	3.65713		6.27461	3.65713		6.27461	3.65713		6.27461	3.65713		6.27461	3.65713		6.27461	3.65713		6.27461	3.65713		6.27461	3.65713		6.27461	3.65713		6.27461	3.65713		6.27461	3.65713		6.27461	3.65713		6.27461	3.65713		6.27461	3.65713
16		6.31259	3.66543		6.31259	3.66543		6.31259	3.66543		6.31259	3.66543		6.31259	3.66543		6.31259	3.66543		6.31259	3.66543		6.31259	3.66543		6.31259	3.66543		6.31259	3.66543		6.31259	3.66543		6.31259	3.66543		6.31259	3.66543		6.31259	3.66543		6.31259	3.66543		6.31259	3.66543
17		6.37487	3.68007		6.37487	3.68007		6.37487	3.68007		6.37487	3.68007		6.37487	3.68007		6.37487	3.68007		6.37487	3.68007		6.37487	3.68007		6.37487	3.68007		6.37487	3.68007		6.37487	3.68007		6.37487	3.68007		6.37487	3.68007		6.37487	3.68007		6.37487	3.68007		6.37487	3.68007
18		6.43715	3.6947		6.43715	3.6947		6.43715	3.6947		6.43715	3.6947		6.43715	3.6947		6.43715	3.6947		6.43715	3.6947		6.43715	3.6947		6.43715	3.6947		6.43715	3.6947		6.43715	3.6947		6.43715	3.6947		6.43715	3.6947		6.43715	3.6947		6.43715	3.6947		6.43715	3.6947
19		6.49943	3.70933		6.49943	3.70933		6.49943	3.70933		6.49943	3.70933		6.49943	3.70933		6.49943	3.70933		6.49943	3.70933		6.49943	3.70933		6.49943	3.70933		6.49943	3.70933		6.49943	3.70933		6.49943	3.70933		6.49943	3.70933		6.49943	3.70933		6.49943	3.70933		6.49943	3.70933
20		6.5617	3.72397		6.5617	3.72397		6.5617	3.72397		6.5617	3.72397		6.5617	3.72397		6.5617	3.72397		6.5617	3.72397		6.5617	3.72397		6.5617	3.72397		6.5617	3.72397		6.5617	3.72397		6.5617	3.72397		6.5617	3.72397		6.5617	3.72397		6.5617	3.72397		6.5617	3.72397
21		6.62398	3.7386		6.62398	3.7386		6.62398	3.7386		6.62398	3.7386		6.62398	3.7386		6.62398	3.7386		6.62398	3.7386		6.62398	3.7386		6.62398	3.7386		6.62398	3.7386		6.62398	3.7386		6.62398	3.7386		6.62398	3.7386		6.62398	3.7386		6.62398	3.7386		6.62398	3.7386
22		6.68626	3.75324		6.68626	3.75324		6.68626	3.75324		6.68626	3.75324		6.68626	3.75324		6.68626	3.75324		6.68626	3.75324		6.68626	3.75324		6.68626	3.75324		6.68626	3.75324		6.68626	3.75324		6.68626	3.75324		6.68626	3.75324		6.68626	3.75324		6.68626	3.75324		6.68626	3.75324
23		6.77172	3.79326		6.77172	3.79326		6.77172	3.79326		6.77172	3.79326		6.77172	3.79326		6.77172	3.79326		6.77172	3.79326		6.77172	3.79326		6.77172	3.79326		6.77172	3.79326		6.77172	3.79326		6.77172	3.79326		6.77172	3.79326		6.77172	3.79326		6.77172	3.79326		6.77172	3.79326
24		6.85718	3.83329		6.85718	3.83329		6.85718	3.83329		6.85718	3.83329		6.85718	3.83329		6.85718	3.83329		6.85718	3.83329		6.85718	3.83329		6.85718	3.83329		6.85718	3.83329		6.85718	3.83329		6.85718	3.83329		6.85718	3.83329		6.85718	3.83329		6.85718	3.83329		6.85718	3.83329
25		6.94264	3.87331		6.94264	3.87331		6.94264	3.87331		6.94264	3.87331		6.94264	3.87331		6.94264	3.87331		6.94264	3.87331		6.94264	3.87331		6.94264	3.87331		6.94264	3.87331		6.94264	3.87331		6.94264	3.87331		6.94264	3.87331		6.94264	3.87331		6.94264	3.87331		6.94264	3.87331
26		7.0281	3.91333		7.0281	3.91333		7.0281	3.91333		7.0281	3.91333		7.0281	3.91333		7.0281	3.91333		7.0281	3.91333		7.0281	3.91333		7.0281	3.91333		7.0281	3.91333		7.0281	3.91333		7.0281	3.91333		7.0281	3.91333		7.0281	3.91333		7.0281	3.91333		7.0281	3.91333
27		7.11356	3.95336		7.11356	3.95336		7.11356	3.95336		7.11356	3.95336		7.11356	3.95336		7.11356	3.95336		7.11356	3.95336		7.11356	3.95336		7.11356	3.95336		7.11356	3.95336		7.11356	3.95336		7.11356	3.95336		7.11356	3.95336		7.11356	3.95336		7.11356	3.95336		7.11356	3.95336
28		7.19902	3.99338		7.19902	3.99338		7.19902	3.99338		7.19902	3.99338		7.19902	3.99338		7.19902	3.99338		7.19902	3.99338		7.19902	3.99338		7.19902	3.99338		7.19902	3.99338		7.19902	3.99338		7.19902	3.99338		7.19902	3.99338		7.19902	3.99338		7.19902	3.99338		7.19902	3.99338
29		7.28002	4.04209		7.28002	4.04209		7.28002	4.04209		7.28002	4.04209		7.28002	4.04209		7.28002	4.04209		7.28002	4.04209		7.28002	4.04209		7.28002	4.04209		7.28002	4.04209		7.28002	4.04209		7.28002	4.04209		7.28002	4.04209		7.28002	4.04209		7.28002	4.04209		7.28002	4.04209
30		7.36102	4.0908		7.36102	4.0908		7.36102	4.0908		7.36102	4.0908		7.36102	4.0908		7.36102	4.0908		7.36102	4.0908		7.36102	4.0908		7.36102	4.0908		7.36102	4.0908		7.36102	4.0908		7.36102	4.0908		7.36102	4.0908		7.36102	4.0908		7.36102	4.0908		7.36102	4.0908
31		7.44202	4.13951		7.44202	4.13951		7.44202	4.13951		7.44202	4.13951		7.44202	4.13951		7.44202	4.13951		7.44202	4.13951		7.44202	4.13951		7.44202	4.13951		7.44202	4.13951		7.44202	4.13951		7.44202	4.13951		7.44202	4.13951		7.44202	4.13951		7.44202	4.13951		7.44202	4.13951
32		7.52302	4.18823		7.52302	4.18823		7.52302	4.18823		7.52302	4.18823		7.52302	4.18823		7.52302	4.18823		7.52302	4.18823		7.52302	4.18823		7.52302	4.18823		7.52302	4.18823		7.52302	4.18823		7.52302	4.18823		7.52302	4.18823		7.52302	4.18823		7.52302	4.18823		7.52302	4.18823
33		7.90938	4.52739		7.90938	4.52739		7.90938	4.52739		7.90938	4.52739		7.90938	4.52739		7.90938	4.52739		7.90938	4.52739		7.90938	4.52739		7.90938	4.52739		7.90938	4.52739		7.90938	4.52739		7.90938	4.52739		7.90938	4.52739		7.90938	4.52739		7.90938	4.52739		7.90938	4.52739
34		7.90214	4.52128		7.90214	4.52128		7.90214	4.52128		7.90214	4.52128		7.90214	4.52128		7.90214	4.52128		7.90214	4.52128		7.90214	4.52128		7.90214	4.52128		7.90214	4.52128		7.90214	4.52128		7.90214	4.52128		7.90214	4.52128		7.90214	4.52128		7.90214	4.52128		7.90214	4.52128
35		7.89553	4.51559		7.89553	4.51559		7.89553	4.51559		7.89553	4.51559		7.89553	4.51559		7.89553	4.51559		7.89553	4.51559		7.89553	4.51559		7.89553	4.51559		7.89553	4.51559		7.89553	4.51559		7.89553	4.51559		7.89553	4.51559		7.89553	4.51559		7.89553	4.51559		7.89553	4.51559
36		7.8889	4.5099		7.8889	4.5099		7.8889	4.5099		7.8889	4.5099		7.8889	4.5099		7.8889	4.5099		7.8889	4.5099		7.8889	4.5099		7.8889	4.5099		7.8889	4.5099		7.8889	4.5099		7.8889	4.5099		7.8889	4.5099		7.8889	4.5099		7.8889	4.5099		7.8889	4.5099
37		7.88226	4.50419		7.88226	4.50419		7.88226	4.50419		7.88226	4.50419		7.88226	4.50419		7.88226	4.50419		7.88226	4.50419		7.88226	4.50419		7.88226	4.50419		7.88226	4.50419		7.88226	4.50419		7.88226	4.50419		7.88226	4.50419		7.88226	4.50419		7.88226	4.50419		7.88226	4.50419
38		7.87626	4.49892		7.87626	4.49892		7.87626	4.49892		7.87626	4.49892		7.87626	4.49892		7.87626	4.49892		7.87626	4.49892		7.87626	4.49892		7.87626	4.49892		7.87626	4.49892		7.87626	4.49892		7.87626	4.49892		7.87626	4.49892		7.87626	4.49892		7.87626	4.49892		7.87626	4.49892
39		7.87024	4.49363		7.87024	4.49363		7.87024	4.49363		7.87024	4.49363		7.87024	4.49363		7.87024	4.49363		7.87024	4.49363		7.87024	4.49363		7.87024	4.49363		7.87024	4.49363		7.87024	4.49363		7.87024	4.49363		7.87024	4.49363		7.87024	4.49363		7.87024	4.49363		7.87024	4.49363
40		7.86421	4.48834		7.86421	4.48834		7.86421	4.48834		7.86421	4.48834		7.86421	4.48834		7.86421	4.48834		7.86421	4.48834		7.86421	4.48834		7.86421	4.48834		7.86421	4.48834		7.86421	4.48834		7.86421	4.48834		7.86421	4.48834		7.86421	4.48834		7.86421	4.48834		7.86421	4.48834
41		7.85883	4.48348		7.85883	4.48348		7.85883	4.48348		7.85883	4.48348		7.85883	4.48348		7.85883	4.48348		7.85883	4.48348		7.85883	4.48348		7.85883	4.48348		7.85883	4.48348		7.85883	4.48348		7.85883	4.48348		7.85883	4.48348		7.85883	4.48348		7.85883	4.48348		7.85883	4.48348
42		7.85344	4.47862		7.85344	4.47862		7.85344	4.47862		7.85344	4.47862		7.85344	4.47862		7.85344	4.47862		7.85344	4.47862		7.85344	4.47862		7.85344	4.47862		7.85344	4.47862		7.85344	4.47862		7.85344	4.47862		7.85344	4.47862		7.85344	4.47862		7.85344	4.47862		7.85344	4.47862
43		7.84804	4.47375		7.84804	4.47375		7.84804	4.47375		7.84804	4.47375		7.84804	4.47375		7.84804	4.47375		7.84804	4.47375		7.84804	4.47375		7.84804	4.47375		7.84804	4.47375		7.84804	4.47375		7.84804	4.47375		7.84804	4.47375		7.84804	4.47375		7.84804	4.47375		7.84804	4.47375
44		7.84263	4.46888		7.84263	4.46888		7.84263	4.46888		7.84263	4.46888		7.84263	4.46888		7.84263	4.46888		7.84263	4.46888		7.84263	4.46888		7.84263	4.46888		7.84263	4.46888		7.84263	4.46888		7.84263	4.46888		7.84263	4.46888		7.84263	4.46888		7.84263	4.46888		7.84263	4.46888
45		7.83787	4.46444		7.83787	4.46444		7.83787	4.46444		7.83787	4.46444		7.83787	4.46444		7.83787	4.46444		7.83787	4.46444		7.83787	4.46444		7.83787	4.46444		7.83787	4.46444		7.83787	4.46444		7.83787	4.46444		7.83787	4.46444		7.83787	4.46444		7.83787	4.46444		7.83787	4.46444
46		7.83158	4.45902		7.83158	4.45902		7.83158	4.45902		7.83158	4.45902		7.83158	4.45902		7.83158	4.45902		7.8331	4.46		7.8331	4.46		7.8331	4.46		7.8331	4.46		7.8331	4.46		7.8331	4.46		7.8331	4.46		7.8331	4.46		7.8331	4.46		7.8331	4.46
47		7.82543	4.45369		7.82543	4.45369		7.82543	4.45369		7.82543	4.45369		7.82543	4.45369		7.82543	4.45369		7.82899	4.45599		7.82899	4.45599		7.82899	4.45599		7.82899	4.45599		7.82899	4.45599		7.82899	4.45599		7.82899	4.45599		7.82899	4.45599		7.82899	4.45599		7.82899	4.45599
48		7.81857	4.44791		7.81857	4.44791		7.81857	4.44791		7.81857	4.44791		7.81857	4.44791		7.81857	4.44791		7.82488	4.45198		7.82488	4.45198		7.82488	4.45198		7.82488	4.45198		7.82488	4.45198		7.82488	4.45198		7.82488	4.45198		7.82488	4.45198		7.82488	4.45198		7.82488	4.45198
49		7.81075	4.44152		7.81075	4.44152		7.81075	4.44152		7.81075	4.44152		7.81075	4.44152		7.81075	4.44152		7.82075	4.44797		7.82075	4.44797		7.82075	4.44797		7.82075	4.44797		7.82075	4.44797		7.82075	4.44797		7.82075	4.44797		7.82075	4.44797		7.82075	4.44797		7.82075	4.44797
50		7.80166	4.43431		7.80166	4.43431		7.80166	4.43431		7.80166	4.43431		7.80166	4.43431		7.80166	4.43431		7.81663	4.44395		7.81663	4.44395		7.81663	4.44395		7.81663	4.44395		7.81663	4.44395		7.81663	4.44395		7.81663	4.44395		7.81663	4.44395		7.81663	4.44395		7.81663	4.44395
51		7.79151	4.42642		7.79151	4.42642		7.79151	4.42642		7.79151	4.42642		7.79151	4.42642		7.79151	4.42642		7.81165	4.4394		7.81165	4.4394		7.81165	4.4394		7.81165	4.4394		7.81165	4.4394		7.81165	4.4394		7.81316	4.44037		7.81316	4.44037		7.81316	4.44037		7.81316	4.44037
52		7.77904	4.41705		7.77904	4.41705		7.77904	4.41705		7.77904	4.41705		7.77904	4.41705		7.77904	4.41705		7.80615	4.43452		7.80615	4.43452		7.80615	4.43452		7.80615	4.43452		7.80615	4.43452		7.80615	4.43452		7.80968	4.43679		7.80968	4.43679		7.80968	4.43679		7.80968	4.43679
53		7.76348	4.40568		7.76348	4.40568		7.76348	4.40568		7.76348	4.40568		7.76348	4.40568		7.76348	4.40568		7.79995	4.42918		7.79995	4.42918		7.79995	4.42918		7.79995	4.42918		7.79995	4.42918		7.79995	4.42918		7.8062	4.43321		7.8062	4.43321		7.8062	4.43321		7.8062	4.43321
54		7.74377	4.39164		7.74377	4.39164		7.74377	4.39164		7.74377	4.39164		7.74377	4.39164		7.74377	4.39164		7.79281	4.42324		7.79281	4.42324		7.79281	4.42324		7.79281	4.42324		7.79281	4.42324		7.79281	4.42324		7.80272	4.42963		7.80272	4.42963		7.80272	4.42963		7.80272	4.42963
55		7.71913	4.37442		7.71913	4.37442		7.71913	4.37442		7.71913	4.37442		7.71913	4.37442		7.71913	4.37442		7.78505	4.41692		7.78505	4.41692		7.78505	4.41692		7.78505	4.41692		7.78505	4.41692		7.78505	4.41692		7.79989	4.42648		7.79989	4.42648		7.79989	4.42648		7.79989	4.42648
56		7.8014	4.42616		7.5406	4.16416		7.3148	3.93466		7.124	3.73766		6.9682	3.57316		6.695	3.24016		7.77559	4.4095		7.77559	4.4095		7.77559	4.4095		7.77559	4.4095		7.77559	4.4095		7.77559	4.4095		7.79557	4.42237		7.79557	4.42237		7.79557	4.42237		7.79557	4.42237
57		7.79922	4.42344		7.53842	4.16144		7.31262	3.93194		7.12182	3.73494		6.96602	3.57044		6.69282	3.23744		7.76448	4.40104		7.76448	4.40104		7.76448	4.40104		7.76448	4.40104		7.76448	4.40104		7.76448	4.40104		7.79139	4.41837		7.79139	4.41837		7.79139	4.41837		7.79139	4.41837
58		7.79638	4.42029		7.53558	4.15829		7.30978	3.92879		7.11898	3.73179		6.96318	3.56729		6.68998	3.23429		7.74964	4.39016		7.74964	4.39016		7.74964	4.39016		7.74964	4.39016		7.74964	4.39016		7.74964	4.39016		7.78585	4.41348		7.78585	4.41348		7.78585	4.41348		7.78585	4.41348
59		7.7942	4.41757		7.5334	4.15557		7.3076	3.92607		7.1168	3.72907		6.961	3.56457		6.6878	3.23157		7.73131	4.37705		7.73131	4.37705		7.73131	4.37705		7.73131	4.37705		7.73131	4.37705		7.73131	4.37705		7.78003	4.40842		7.78003	4.40842		7.78003	4.40842		7.78003	4.40842
60		7.79201	4.41486		7.53121	4.15286		7.30541	3.92336		7.11461	3.72636		6.95881	3.56186		6.68561	3.22886		7.70743	4.36035		7.70743	4.36035		7.70743	4.36035		7.70743	4.36035		7.70743	4.36035		7.70743	4.36035		7.77295	4.40255		7.77295	4.40255		7.77295	4.40255		7.77295	4.40255
61		7.79048	4.41257		7.52968	4.15057		7.30388	3.92107		7.11308	3.72407		6.95728	3.55957		6.68408	3.22657		7.79048	4.41257		7.52968	4.15057		7.30388	3.92107		7.11308	3.72407		6.95728	3.55957		6.68408	3.22657		7.76482	4.39602		7.76482	4.39602		7.76482	4.39602		7.76482	4.39602
62		7.78829	4.40986		7.52749	4.14786		7.30169	3.91836		7.11089	3.72136		6.95509	3.55686		6.68189	3.22386		7.78829	4.40986		7.52749	4.14786		7.30169	3.91836		7.11089	3.72136		6.95509	3.55686		6.68189	3.22386		7.75374	4.3876		7.75374	4.3876		7.75374	4.3876		7.75374	4.3876
63		7.78676	4.40757		7.52596	4.14557		7.30016	3.91607		7.10936	3.71907		6.95356	3.55457		6.68036	3.22157		7.78676	4.40757		7.52596	4.14557		7.30016	3.91607		7.10936	3.71907		6.95356	3.55457		6.68036	3.22157		7.74025	4.37762		7.74025	4.37762		7.74025	4.37762		7.74025	4.37762
64		7.78522	4.40529		7.52442	4.14329		7.29862	3.91379		7.10782	3.71679		6.95202	3.55229		6.67882	3.21929		7.78522	4.40529		7.52442	4.14329		7.29862	3.91379		7.10782	3.71679		6.95202	3.55229		6.67882	3.21929		7.72263	4.36499		7.72263	4.36499		7.72263	4.36499		7.72263	4.36499
65		7.78435	4.40344		7.52355	4.14144		7.29775	3.91194		7.10695	3.71494		6.95115	3.55044		6.67795	3.21744		7.78435	4.40344		7.52355	4.14144		7.29775	3.91194		7.10695	3.71494		6.95115	3.55044		6.67795	3.21744		7.70011	4.34921		7.70011	4.34921		7.70011	4.34921		7.70011	4.34921
66		7.7828	4.40116		7.522	4.13916		7.2962	3.90966		7.1054	3.71266		6.9496	3.54816		6.6764	3.21516		7.7828	4.40116		7.522	4.13916		7.2962	3.90966		7.1054	3.71266		6.9496	3.54816		6.6764	3.21516		7.7828	4.40116		7.522	4.13916		7.2962	3.90966		7.1054	3.71266
67		7.78192	4.39931		7.52112	4.13731		7.29532	3.90781		7.10452	3.71081		6.94872	3.54631		6.67552	3.21331		7.78192	4.39931		7.52112	4.13731		7.29532	3.90781		7.10452	3.71081		6.94872	3.54631		6.67552	3.21331		7.78192	4.39931		7.52112	4.13731		7.29532	3.90781		7.10452	3.71081
68		7.78103	4.39746		7.52023	4.13546		7.29443	3.90596		7.10363	3.70896		6.94783	3.54446		6.67463	3.21146		7.78103	4.39746		7.52023	4.13546		7.29443	3.90596		7.10363	3.70896		6.94783	3.54446		6.67463	3.21146		7.78103	4.39746		7.52023	4.13546		7.29443	3.90596		7.10363	3.70896
69		7.7808	4.39605		7.52	4.13405		7.2942	3.90455		7.1034	3.70755		6.9476	3.54305		6.6744	3.21005		7.7808	4.39605		7.52	4.13405		7.2942	3.90455		7.1034	3.70755		6.9476	3.54305		6.6744	3.21005		7.7808	4.39605		7.52	4.13405		7.2942	3.90455		7.1034	3.70755
70		7.77991	4.3942		7.51911	4.1322		7.29331	3.9027		7.10251	3.7057		6.94671	3.5412		6.67351	3.2082		7.77991	4.3942		7.51911	4.1322		7.29331	3.9027		7.10251	3.7057		6.94671	3.5412		6.67351	3.2082		7.77991	4.3942		7.51911	4.1322		7.29331	3.9027		7.10251	3.7057
71		7.77968	4.39279		7.51888	4.13079		7.29308	3.90129		7.10228	3.70429		6.94648	3.53979		6.67328	3.20679		7.77968	4.39279		7.51888	4.13079		7.29308	3.90129		7.10228	3.70429		6.94648	3.53979		6.67328	3.20679		7.77968	4.39279		7.51888	4.13079		7.29308	3.90129		7.10228	3.70429
72		7.77944	4.39137		7.51864	4.12937		7.29284	3.89987		7.10204	3.70287		6.94624	3.53837		6.67304	3.20537		7.77944	4.39137		7.51864	4.12937		7.29284	3.89987		7.10204	3.70287		6.94624	3.53837		6.67304	3.20537		7.77944	4.39137		7.51864	4.12937		7.29284	3.89987		7.10204	3.70287
73		7.77919	4.38996		7.51839	4.12796		7.29259	3.89846		7.10179	3.70146		6.94599	3.53696		6.67279	3.20396		7.77919	4.38996		7.51839	4.12796		7.29259	3.89846		7.10179	3.70146		6.94599	3.53696		6.67279	3.20396		7.77919	4.38996		7.51839	4.12796		7.29259	3.89846		7.10179	3.70146
74		7.77961	4.38898		7.51881	4.12698		7.29301	3.89748		7.10221	3.70048		6.94641	3.53598		6.67321	3.20298		7.77961	4.38898		7.51881	4.12698		7.29301	3.89748		7.10221	3.70048		6.94641	3.53598		6.67321	3.20298		7.77961	4.38898		7.51881	4.12698		7.29301	3.89748		7.10221	3.70048
75		7.77936	4.38757		7.51856	4.12557		7.29276	3.89607		7.10196	3.69907		6.94616	3.53457		6.67296	3.20157		7.77936	4.38757		7.51856	4.12557		7.29276	3.89607		7.10196	3.69907		6.94616	3.53457		6.67296	3.20157		7.77936	4.38757		7.51856	4.12557		7.29276	3.89607		7.10196	3.69907
76		7.77976	4.38658		7.51896	4.12458		7.29316	3.89508		7.10236	3.69808		6.94656	3.53358		6.67336	3.20058		7.77976	4.38658		7.51896	4.12458		7.29316	3.89508		7.10236	3.69808		6.94656	3.53358		6.67336	3.20058		7.77976	4.38658		7.51896	4.12458		7.29316	3.89508		7.10236	3.69808
77		7.78017	4.3856		7.51937	4.1236		7.29357	3.8941		7.10277	3.6971		6.94697	3.5326		6.67377	3.1996		7.78017	4.3856		7.51937	4.1236		7.29357	3.8941		7.10277	3.6971		6.94697	3.5326		6.67377	3.1996		7.78017	4.3856		7.51937	4.1236		7.29357	3.8941		7.10277	3.6971
78		7.78122	4.38505		7.52042	4.12305		7.29462	3.89355		7.10382	3.69655		6.94802	3.53205		6.67482	3.19905		7.78122	4.38505		7.52042	4.12305		7.29462	3.89355		7.10382	3.69655		6.94802	3.53205		6.67482	3.19905		7.78122	4.38505		7.52042	4.12305		7.29462	3.89355		7.10382	3.69655
79		7.78162	4.38407		7.52082	4.12207		7.29502	3.89257		7.10422	3.69557		6.94842	3.53107		6.67522	3.19807		7.78162	4.38407		7.52082	4.12207		7.29502	3.89257		7.10422	3.69557		6.94842	3.53107		6.67522	3.19807		7.78162	4.38407		7.52082	4.12207		7.29502	3.89257		7.10422	3.69557
80		7.78267	4.38352		7.52187	4.12152		7.29607	3.89202		7.10527	3.69502		6.94947	3.53052		6.67627	3.19752		7.78267	4.38352		7.52187	4.12152		7.29607	3.89202		7.10527	3.69502		6.94947	3.53052		6.67627	3.19752		7.78267	4.38352		7.52187	4.12152		7.29607	3.89202		7.10527	3.69502
81		7.79993	4.38924		7.53913	4.12724		7.31333	3.89774		7.12253	3.70074		6.96673	3.53624		6.69353	3.20324		7.79993	4.38924		7.53913	4.12724		7.31333	3.89774		7.12253	3.70074		6.96673	3.53624		6.69353	3.20324		7.79993	4.38924		7.53913	4.12724		7.31333	3.89774		7.12253	3.70074
82		7.80099	4.38871		7.54019	4.12671		7.31439	3.89721		7.12359	3.70021		6.96779	3.53571		6.69459	3.20271		7.80099	4.38871		7.54019	4.12671		7.31439	3.89721		7.12359	3.70021		6.96779	3.53571		6.69459	3.20271		7.80099	4.38871		7.54019	4.12671		7.31439	3.89721		7.12359	3.70021
83		7.80205	4.38817		7.54125	4.12617		7.31545	3.89667		7.12465	3.69967		6.96885	3.53517		6.69565	3.20217		7.80205	4.38817		7.54125	4.12617		7.31545	3.89667		7.12465	3.69967		6.96885	3.53517		6.69565	3.20217		7.80205	4.38817		7.54125	4.12617		7.31545	3.89667		7.12465	3.69967
84		7.8031	4.38764		7.5423	4.12564		7.3165	3.89614		7.1257	3.69914		6.9699	3.53464		6.6967	3.20164		7.8031	4.38764		7.5423	4.12564		7.3165	3.89614		7.1257	3.69914		6.9699	3.53464		6.6967	3.20164		7.8031	4.38764		7.5423	4.12564		7.3165	3.89614		7.1257	3.69914
85		7.8048	4.38753		7.544	4.12553		7.3182	3.89603		7.1274	3.69903		6.9716	3.53453		6.6984	3.20153		7.8048	4.38753		7.544	4.12553		7.3182	3.89603		7.1274	3.69903		6.9716	3.53453		6.6984	3.20153		7.8048	4.38753		7.544	4.12553		7.3182	3.89603		7.1274	3.69903
86		7.80649	4.38742		7.54569	4.12542		7.31989	3.89592		7.12909	3.69892		6.97329	3.53442		6.70009	3.20142		7.80649	4.38742		7.54569	4.12542		7.31989	3.89592		7.12909	3.69892		6.97329	3.53442		6.70009	3.20142		7.80649	4.38742		7.54569	4.12542		7.31989	3.89592		7.12909	3.69892
87		7.80818	4.38731		7.54738	4.12531		7.32158	3.89581		7.13078	3.69881		6.97498	3.53431		6.70178	3.20131		7.80818	4.38731		7.54738	4.12531		7.32158	3.89581		7.13078	3.69881		6.97498	3.53431		6.70178	3.20131		7.80818	4.38731		7.54738	4.12531		7.32158	3.89581		7.13078	3.69881
88		7.80987	4.3872		7.54907	4.1252		7.32327	3.8957		7.13247	3.6987		6.97667	3.5342		6.70347	3.2012		7.80987	4.3872		7.54907	4.1252		7.32327	3.8957		7.13247	3.6987		6.97667	3.5342		6.70347	3.2012		7.80987	4.3872		7.54907	4.1252		7.32327	3.8957		7.13247	3.6987
89		7.81155	4.38709		7.55075	4.12509		7.32495	3.89559		7.13415	3.69859		6.97835	3.53409		6.70515	3.20109		7.81155	4.38709		7.55075	4.12509		7.32495	3.89559		7.13415	3.69859		6.97835	3.53409		6.70515	3.20109		7.81155	4.38709		7.55075	4.12509		7.32495	3.89559		7.13415	3.69859
90		7.81322	4.38698		7.55242	4.12498		7.32662	3.89548		7.13582	3.69848		6.98002	3.53398		6.70682	3.20098		7.81322	4.38698		7.55242	4.12498		7.32662	3.89548		7.13582	3.69848		6.98002	3.53398		6.70682	3.20098		7.81322	4.38698		7.55242	4.12498		7.32662	3.89548		7.13582	3.69848
91		7.81554	4.3873		7.55474	4.1253		7.32894	3.8958		7.13814	3.6988		6.98234	3.5343		6.70914	3.2013		7.81554	4.3873		7.55474	4.1253		7.32894	3.8958		7.13814	3.6988		6.98234	3.5343		6.70914	3.2013		7.81554	4.3873		7.55474	4.1253		7.32894	3.8958		7.13814	3.6988
92		7.81721	4.38718		7.55641	4.12518		7.33061	3.89568		7.13981	3.69868		6.98401	3.53418		6.71081	3.20118		7.81721	4.38718		7.55641	4.12518		7.33061	3.89568		7.13981	3.69868		6.98401	3.53418		6.71081	3.20118		7.81721	4.38718		7.55641	4.12518		7.33061	3.89568		7.13981	3.69868
93		7.81952	4.3875		7.55872	4.1255		7.33292	3.896		7.14212	3.699		6.98632	3.5345		6.71312	3.2015		7.81952	4.3875		7.55872	4.1255		7.33292	3.896		7.14212	3.699		6.98632	3.5345		6.71312	3.2015		7.81952	4.3875		7.55872	4.1255		7.33292	3.896		7.14212	3.699
94		7.82182	4.38781		7.56102	4.12581		7.33522	3.89631		7.14442	3.69931		6.98862	3.53481		6.71542	3.20181		7.82182	4.38781		7.56102	4.12581		7.33522	3.89631		7.14442	3.69931		6.98862	3.53481		6.71542	3.20181		7.82182	4.38781		7.56102	4.12581		7.33522	3.89631		7.14442	3.69931
95		7.82412	4.38812		7.56332	4.12612		7.33752	3.89662		7.14672	3.69962		6.99092	3.53512		6.71772	3.20212		7.82412	4.38812		7.56332	4.12612		7.33752	3.89662		7.14672	3.69962		6.99092	3.53512		6.71772	3.20212		7.82412	4.38812		7.56332	4.12612		7.33752	3.89662		7.14672	3.69962
96		7.82706	4.38885		7.56626	4.12685		7.34046	3.89735		7.14966	3.70035		6.99386	3.53585		6.72066	3.20285		7.82706	4.38885		7.56626	4.12685		7.34046	3.89735		7.14966	3.70035		6.99386	3.53585		6.72066	3.20285		7.82706	4.38885		7.56626	4.12685		7.34046	3.89735		7.14966	3.70035
97		7.82935	4.38916		7.56855	4.12716		7.34275	3.89766		7.15195	3.70066		6.99615	3.53616		6.72295	3.20316		7.82935	4.38916		7.56855	4.12716		7.34275	3.89766		7.15195	3.70066		6.99615	3.53616		6.72295	3.20316		7.82935	4.38916		7.56855	4.12716		7.34275	3.89766		7.15195	3.70066
98		7.83228	4.38989		7.57148	4.12789		7.34568	3.89839		7.15488	3.70139		6.99908	3.53689		6.72588	3.20389		7.83228	4.38989		7.57148	4.12789		7.34568	3.89839		7.15488	3.70139		6.99908	3.53689		6.72588	3.20389		7.83228	4.38989		7.57148	4.12789		7.34568	3.89839		7.15488	3.70139
99		7.83456	4.3902		7.57376	4.1282		7.34796	3.8987		7.15716	3.7017		7.00136	3.5372		6.72816	3.2042		7.83456	4.3902		7.57376	4.1282		7.34796	3.8987		7.15716	3.7017		7.00136	3.5372		6.72816	3.2042		7.83456	4.3902		7.57376	4.1282		7.34796	3.8987		7.15716	3.7017
100		7.83748	4.39093		7.57668	4.12893		7.35088	3.89943		7.16008	3.70243		7.00428	3.53793		6.73108	3.20493		7.83748	4.39093		7.57668	4.12893		7.35088	3.89943		7.16008	3.70243		7.00428	3.53793		6.73108	3.20493		7.83748	4.39093		7.57668	4.12893		7.35088	3.89943		7.16008	3.70243
101		7.84039	4.39166		7.57959	4.12966		7.35379	3.90016		7.16299	3.70316		7.00719	3.53866		6.73399	3.20566		7.84039	4.39166		7.57959	4.12966		7.35379	3.90016		7.16299	3.70316		7.00719	3.53866		6.73399	3.20566		7.84039	4.39166		7.57959	4.12966		7.35379	3.90016		7.16299	3.70316
102		7.8433	4.39238		7.5825	4.13038		7.3567	3.90088		7.1659	3.70388		7.0101	3.53938		6.7369	3.20638		7.8433	4.39238		7.5825	4.13038		7.3567	3.90088		7.1659	3.70388		7.0101	3.53938		6.7369	3.20638		7.8433	4.39238		7.5825	4.13038		7.3567	3.90088		7.1659	3.70388
103		7.8462	4.39311		7.5854	4.13111		7.3596	3.90161		7.1688	3.70461		7.013	3.54011		6.7398	3.20711		7.8462	4.39311		7.5854	4.13111		7.3596	3.90161		7.1688	3.70461		7.013	3.54011		6.7398	3.20711		7.8462	4.39311		7.5854	4.13111		7.3596	3.90161		7.1688	3.70461
104		7.84909	4.39383		7.58829	4.13183		7.36249	3.90233		7.17169	3.70533		7.01589	3.54083		6.74269	3.20783		7.84909	4.39383		7.58829	4.13183		7.36249	3.90233		7.17169	3.70533		7.01589	3.54083		6.74269	3.20783		7.84909	4.39383		7.58829	4.13183		7.36249	3.90233		7.17169	3.70533
105		7.85198	4.39455		7.59118	4.13255		7.36538	3.90305		7.17458	3.70605		7.01878	3.54155		6.74558	3.20855		7.85198	4.39455		7.59118	4.13255		7.36538	3.90305		7.17458	3.70605		7.01878	3.54155		6.74558	3.20855		7.85198	4.39455		7.59118	4.13255		7.36538	3.90305		7.17458	3.70605
106		7.85551	4.3957		7.59471	4.1337		7.36891	3.9042		7.17811	3.7072		7.02231	3.5427		6.74911	3.2097		7.85551	4.3957		7.59471	4.1337		7.36891	3.9042		7.17811	3.7072		7.02231	3.5427		6.74911	3.2097		7.85551	4.3957		7.59471	4.1337		7.36891	3.9042		7.17811	3.7072
107		7.85839	4.39642		7.59759	4.13442		7.37179	3.90492		7.18099	3.70792		7.02519	3.54342		6.75199	3.21042		7.85839	4.39642		7.59759	4.13442		7.37179	3.90492		7.18099	3.70792		7.02519	3.54342		6.75199	3.21042		7.85839	4.39642		7.59759	4.13442		7.37179	3.90492		7.18099	3.70792
108		7.86191	4.39756		7.60111	4.13556		7.37531	3.90606		7.18451	3.70906		7.02871	3.54456		6.75551	3.21156		7.86191	4.39756		7.60111	4.13556		7.37531	3.90606		7.18451	3.70906		7.02871	3.54456		6.75551	3.21156		7.86191	4.39756		7.60111	4.13556		7.37531	3.90606		7.18451	3.70906
109		7.86478	4.39828		7.60398	4.13628		7.37818	3.90678		7.18738	3.70978		7.03158	3.54528		6.75838	3.21228		7.86478	4.39828		7.60398	4.13628		7.37818	3.90678		7.18738	3.70978		7.03158	3.54528		6.75838	3.21228		7.86478	4.39828		7.60398	4.13628		7.37818	3.90678		7.18738	3.70978
110		7.86828	4.39942		7.60748	4.13742		7.38168	3.90792		7.19088	3.71092		7.03508	3.54642		6.76188	3.21342		7.86828	4.39942		7.60748	4.13742		7.38168	3.90792		7.19088	3.71092		7.03508	3.54642		6.76188	3.21342		7.86828	4.39942		7.60748	4.13742		7.38168	3.90792		7.19088	3.71092
111		7.87178	4.40056		7.61098	4.13856		7.38518	3.90906		7.19438	3.71206		7.03858	3.54756		6.76538	3.21456		7.87178	4.40056		7.61098	4.13856		7.38518	3.90906		7.19438	3.71206		7.03858	3.54756		6.76538	3.21456		7.87178	4.40056		7.61098	4.13856		7.38518	3.90906		7.19438	3.71206
112		7.87528	4.4017		7.61448	4.1397		7.38868	3.9102		7.19788	3.7132		7.04208	3.5487		6.76888	3.2157		7.87528	4.4017		7.61448	4.1397		7.38868	3.9102		7.19788	3.7132		7.04208	3.5487		6.76888	3.2157		7.87528	4.4017		7.61448	4.1397		7.38868	3.9102		7.19788	3.7132
113		7.87876	4.40283		7.61796	4.14083		7.39216	3.91133		7.20136	3.71433		7.04556	3.54983		6.77236	3.21683		7.87876	4.40283		7.61796	4.14083		7.39216	3.91133		7.20136	3.71433		7.04556	3.54983		6.77236	3.21683		7.87876	4.40283		7.61796	4.14083		7.39216	3.91133		7.20136	3.71433
114		7.88225	4.40396		7.62145	4.14196		7.39565	3.91246		7.20485	3.71546		7.04905	3.55096		6.77585	3.21796		7.88225	4.40396		7.62145	4.14196		7.39565	3.91246		7.20485	3.71546		7.04905	3.55096		6.77585	3.21796		7.88225	4.40396		7.62145	4.14196		7.39565	3.91246		7.20485	3.71546
115		7.88572	4.4051		7.62492	4.1431		7.39912	3.9136		7.20832	3.7166		7.05252	3.5521		6.77932	3.2191		7.88572	4.4051		7.62492	4.1431		7.39912	3.9136		7.20832	3.7166		7.05252	3.5521		6.77932	3.2191		7.88572	4.4051		7.62492	4.1431		7.39912	3.9136		7.20832	3.7166
116		7.88919	4.40623		7.62839	4.14423		7.40259	3.91473		7.21179	3.71773		7.05599	3.55323		6.78279	3.22023		7.88919	4.40623		7.62839	4.14423		7.40259	3.91473		7.21179	3.71773		7.05599	3.55323		6.78279	3.22023		7.88919	4.40623		7.62839	4.14423		7.40259	3.91473		7.21179	3.71773
117		7.89266	4.40736		7.63186	4.14536		7.40606	3.91586		7.21526	3.71886		7.05946	3.55436		6.78626	3.22136		7.89266	4.40736		7.63186	4.14536		7.40606	3.91586		7.21526	3.71886		7.05946	3.55436		6.78626	3.22136		7.89266	4.40736		7.63186	4.14536		7.40606	3.91586		7.21526	3.71886
118		7.89612	4.40848		7.63532	4.14648		7.40952	3.91698		7.21872	3.71998		7.06292	3.55548		6.78972	3.22248		7.89612	4.40848		7.63532	4.14648		7.40952	3.91698		7.21872	3.71998		7.06292	3.55548		6.78972	3.22248		7.89612	4.40848		7.63532	4.14648		7.40952	3.91698		7.21872	3.71998
119		7.90021	4.41003		7.63941	4.14803		7.41361	3.91853		7.22281	3.72153		7.06701	3.55703		6.79381	3.22403		7.90021	4.41003		7.63941	4.14803		7.41361	3.91853		7.22281	3.72153		7.06701	3.55703		6.79381	3.22403		7.90021	4.41003		7.63941	4.14803		7.41361	3.91853		7.22281	3.72153
120		7.90366	4.41116		7.64286	4.14916		7.41706	3.91966		7.22626	3.72266		7.07046	3.55816		6.79726	3.22516		7.90366	4.41116		7.64286	4.14916		7.41706	3.91966		7.22626	3.72266		7.07046	3.55816		6.79726	3.22516		7.90366	4.41116		7.64286	4.14916		7.41706	3.91966		7.22626	3.72266
AMBH		LAB at 40 km																		LAB at 45 km																		LAB at 50 km
		no melt			melt 0.5%			melt 1%			melt 1.5%			melt 2%			melt 4%			no melt			melt 0.5%			melt 1%			melt 1.5%			melt 2%			melt 4%			no melt			melt 0.5%			melt 1%			melt 1.5%
Depth		Vp	Vs		Vp	Vs		Vp	Vs		Vp	Vs		Vp	Vs		Vp	Vs		Vp	Vs		Vp	Vs		Vp	Vs		Vp	Vs		Vp	Vs		Vp	Vs		Vp	Vs		Vp	Vs		Vp	Vs		Vp	Vs
1		2.0406	1.14		2.0406	1.14		2.0406	1.14		2.0406	1.14		2.0406	1.14		2.0406	1.14		2.0406	1.14		2.0406	1.14		2.0406	1.14		2.0406	1.14		2.0406	1.14		2.0406	1.14		2.0406	1.14		2.0406	1.14		2.0406	1.14		2.0406	1.14
2		2.95947	1.65333		2.95947	1.65333		2.95947	1.65333		2.95947	1.65333		2.95947	1.65333		2.95947	1.65333		2.95947	1.65333		2.95947	1.65333		2.95947	1.65333		2.95947	1.65333		2.95947	1.65333		2.95947	1.65333		2.95947	1.65333		2.95947	1.65333		2.95947	1.65333		2.95947	1.65333
3		3.87833	2.16667		3.87833	2.16667		3.87833	2.16667		3.87833	2.16667		3.87833	2.16667		3.87833	2.16667		3.87833	2.16667		3.87833	2.16667		3.87833	2.16667		3.87833	2.16667		3.87833	2.16667		3.87833	2.16667		3.87833	2.16667		3.87833	2.16667		3.87833	2.16667		3.87833	2.16667
4		4.7972	2.68		4.7972	2.68		4.7972	2.68		4.7972	2.68		4.7972	2.68		4.7972	2.68		4.7972	2.68		4.7972	2.68		4.7972	2.68		4.7972	2.68		4.7972	2.68		4.7972	2.68		4.7972	2.68		4.7972	2.68		4.7972	2.68		4.7972	2.68
5		5.39047	3.13208		5.39047	3.13208		5.39047	3.13208		5.39047	3.13208		5.39047	3.13208		5.39047	3.13208		5.39047	3.13208		5.39047	3.13208		5.39047	3.13208		5.39047	3.13208		5.39047	3.13208		5.39047	3.13208		5.39047	3.13208		5.39047	3.13208		5.39047	3.13208		5.39047	3.13208
6		5.98374	3.58415		5.98374	3.58415		5.98374	3.58415		5.98374	3.58415		5.98374	3.58415		5.98374	3.58415		5.98374	3.58415		5.98374	3.58415		5.98374	3.58415		5.98374	3.58415		5.98374	3.58415		5.98374	3.58415		5.98374	3.58415		5.98374	3.58415		5.98374	3.58415		5.98374	3.58415
7		5.99906	3.58871		5.99906	3.58871		5.99906	3.58871		5.99906	3.58871		5.99906	3.58871		5.99906	3.58871		5.99906	3.58871		5.99906	3.58871		5.99906	3.58871		5.99906	3.58871		5.99906	3.58871		5.99906	3.58871		5.99906	3.58871		5.99906	3.58871		5.99906	3.58871		5.99906	3.58871
8		6.01438	3.59327		6.01438	3.59327		6.01438	3.59327		6.01438	3.59327		6.01438	3.59327		6.01438	3.59327		6.01438	3.59327		6.01438	3.59327		6.01438	3.59327		6.01438	3.59327		6.01438	3.59327		6.01438	3.59327		6.01438	3.59327		6.01438	3.59327		6.01438	3.59327		6.01438	3.59327
9		6.04954	3.60446		6.04954	3.60446		6.04954	3.60446		6.04954	3.60446		6.04954	3.60446		6.04954	3.60446		6.04954	3.60446		6.04954	3.60446		6.04954	3.60446		6.04954	3.60446		6.04954	3.60446		6.04954	3.60446		6.04954	3.60446		6.04954	3.60446		6.04954	3.60446		6.04954	3.60446
10		6.08471	3.61565		6.08471	3.61565		6.08471	3.61565		6.08471	3.61565		6.08471	3.61565		6.08471	3.61565		6.08471	3.61565		6.08471	3.61565		6.08471	3.61565		6.08471	3.61565		6.08471	3.61565		6.08471	3.61565		6.08471	3.61565		6.08471	3.61565		6.08471	3.61565		6.08471	3.61565
11		6.16414	3.63732		6.16414	3.63732		6.16414	3.63732		6.16414	3.63732		6.16414	3.63732		6.16414	3.63732		6.16414	3.63732		6.16414	3.63732		6.16414	3.63732		6.16414	3.63732		6.16414	3.63732		6.16414	3.63732		6.16414	3.63732		6.16414	3.63732		6.16414	3.63732		6.16414	3.63732
12		6.24358	3.65899		6.24358	3.65899		6.24358	3.65899		6.24358	3.65899		6.24358	3.65899		6.24358	3.65899		6.24358	3.65899		6.24358	3.65899		6.24358	3.65899		6.24358	3.65899		6.24358	3.65899		6.24358	3.65899		6.24358	3.65899		6.24358	3.65899		6.24358	3.65899		6.24358	3.65899
13		6.32301	3.68066		6.32301	3.68066		6.32301	3.68066		6.32301	3.68066		6.32301	3.68066		6.32301	3.68066		6.32301	3.68066		6.32301	3.68066		6.32301	3.68066		6.32301	3.68066		6.32301	3.68066		6.32301	3.68066		6.32301	3.68066		6.32301	3.68066		6.32301	3.68066		6.32301	3.68066
14		6.45373	3.7145		6.45373	3.7145		6.45373	3.7145		6.45373	3.7145		6.45373	3.7145		6.45373	3.7145		6.45373	3.7145		6.45373	3.7145		6.45373	3.7145		6.45373	3.7145		6.45373	3.7145		6.45373	3.7145		6.45373	3.7145		6.45373	3.7145		6.45373	3.7145		6.45373	3.7145
15		6.58444	3.74834		6.58444	3.74834		6.58444	3.74834		6.58444	3.74834		6.58444	3.74834		6.58444	3.74834		6.58444	3.74834		6.58444	3.74834		6.58444	3.74834		6.58444	3.74834		6.58444	3.74834		6.58444	3.74834		6.58444	3.74834		6.58444	3.74834		6.58444	3.74834		6.58444	3.74834
16		6.71515	3.78217		6.71515	3.78217		6.71515	3.78217		6.71515	3.78217		6.71515	3.78217		6.71515	3.78217		6.71515	3.78217		6.71515	3.78217		6.71515	3.78217		6.71515	3.78217		6.71515	3.78217		6.71515	3.78217		6.71515	3.78217		6.71515	3.78217		6.71515	3.78217		6.71515	3.78217
17		6.84711	3.8442		6.84711	3.8442		6.84711	3.8442		6.84711	3.8442		6.84711	3.8442		6.84711	3.8442		6.84711	3.8442		6.84711	3.8442		6.84711	3.8442		6.84711	3.8442		6.84711	3.8442		6.84711	3.8442		6.84711	3.8442		6.84711	3.8442		6.84711	3.8442		6.84711	3.8442
18		6.97907	3.90623		6.97907	3.90623		6.97907	3.90623		6.97907	3.90623		6.97907	3.90623		6.97907	3.90623		6.97907	3.90623		6.97907	3.90623		6.97907	3.90623		6.97907	3.90623		6.97907	3.90623		6.97907	3.90623		6.97907	3.90623		6.97907	3.90623		6.97907	3.90623		6.97907	3.90623
19		7.11103	3.96826		7.11103	3.96826		7.11103	3.96826		7.11103	3.96826		7.11103	3.96826		7.11103	3.96826		7.11103	3.96826		7.11103	3.96826		7.11103	3.96826		7.11103	3.96826		7.11103	3.96826		7.11103	3.96826		7.11103	3.96826		7.11103	3.96826		7.11103	3.96826		7.11103	3.96826
20		7.24299	4.03028		7.24299	4.03028		7.24299	4.03028		7.24299	4.03028		7.24299	4.03028		7.24299	4.03028		7.24299	4.03028		7.24299	4.03028		7.24299	4.03028		7.24299	4.03028		7.24299	4.03028		7.24299	4.03028		7.24299	4.03028		7.24299	4.03028		7.24299	4.03028		7.24299	4.03028
21		7.35177	4.09603		7.35177	4.09603		7.35177	4.09603		7.35177	4.09603		7.35177	4.09603		7.35177	4.09603		7.35177	4.09603		7.35177	4.09603		7.35177	4.09603		7.35177	4.09603		7.35177	4.09603		7.35177	4.09603		7.35177	4.09603		7.35177	4.09603		7.35177	4.09603		7.35177	4.09603
22		7.46055	4.16178		7.46055	4.16178		7.46055	4.16178		7.46055	4.16178		7.46055	4.16178		7.46055	4.16178		7.46055	4.16178		7.46055	4.16178		7.46055	4.16178		7.46055	4.16178		7.46055	4.16178		7.46055	4.16178		7.46055	4.16178		7.46055	4.16178		7.46055	4.16178		7.46055	4.16178
23		7.56933	4.22752		7.56933	4.22752		7.56933	4.22752		7.56933	4.22752		7.56933	4.22752		7.56933	4.22752		7.56933	4.22752		7.56933	4.22752		7.56933	4.22752		7.56933	4.22752		7.56933	4.22752		7.56933	4.22752		7.56933	4.22752		7.56933	4.22752		7.56933	4.22752		7.56933	4.22752
24		7.98167	4.58724		7.98167	4.58724		7.98167	4.58724		7.98167	4.58724		7.98167	4.58724		7.98167	4.58724		7.98167	4.58724		7.98167	4.58724		7.98167	4.58724		7.98167	4.58724		7.98167	4.58724		7.98167	4.58724		7.98167	4.58724		7.98167	4.58724		7.98167	4.58724		7.98167	4.58724
25		7.9728	4.58001		7.9728	4.58001		7.9728	4.58001		7.9728	4.58001		7.9728	4.58001		7.9728	4.58001		7.9728	4.58001		7.9728	4.58001		7.9728	4.58001		7.9728	4.58001		7.9728	4.58001		7.9728	4.58001		7.9728	4.58001		7.9728	4.58001		7.9728	4.58001		7.9728	4.58001
26		7.96451	4.57318		7.96451	4.57318		7.96451	4.57318		7.96451	4.57318		7.96451	4.57318		7.96451	4.57318		7.96451	4.57318		7.96451	4.57318		7.96451	4.57318		7.96451	4.57318		7.96451	4.57318		7.96451	4.57318		7.96451	4.57318		7.96451	4.57318		7.96451	4.57318		7.96451	4.57318
27		7.95618	4.56632		7.95618	4.56632		7.95618	4.56632		7.95618	4.56632		7.95618	4.56632		7.95618	4.56632		7.95618	4.56632		7.95618	4.56632		7.95618	4.56632		7.95618	4.56632		7.95618	4.56632		7.95618	4.56632		7.95618	4.56632		7.95618	4.56632		7.95618	4.56632		7.95618	4.56632
28		7.94782	4.55945		7.94782	4.55945		7.94782	4.55945		7.94782	4.55945		7.94782	4.55945		7.94782	4.55945		7.94782	4.55945		7.94782	4.55945		7.94782	4.55945		7.94782	4.55945		7.94782	4.55945		7.94782	4.55945		7.94782	4.55945		7.94782	4.55945		7.94782	4.55945		7.94782	4.55945
29		7.93941	4.55255		7.93941	4.55255		7.93941	4.55255		7.93941	4.55255		7.93941	4.55255		7.93941	4.55255		7.93941	4.55255		7.93941	4.55255		7.93941	4.55255		7.93941	4.55255		7.93941	4.55255		7.93941	4.55255		7.93941	4.55255		7.93941	4.55255		7.93941	4.55255		7.93941	4.55255
30		7.93162	4.54607		7.93162	4.54607		7.93162	4.54607		7.93162	4.54607		7.93162	4.54607		7.93162	4.54607		7.93162	4.54607		7.93162	4.54607		7.93162	4.54607		7.93162	4.54607		7.93162	4.54607		7.93162	4.54607		7.93162	4.54607		7.93162	4.54607		7.93162	4.54607		7.93162	4.54607
31		7.92222	4.53854		7.92222	4.53854		7.92222	4.53854		7.92222	4.53854		7.92222	4.53854		7.92222	4.53854		7.9238	4.53957		7.9238	4.53957		7.9238	4.53957		7.9238	4.53957		7.9238	4.53957		7.9238	4.53957		7.9238	4.53957		7.9238	4.53957		7.9238	4.53957		7.9238	4.53957
32		7.91289	4.53108		7.91289	4.53108		7.91289	4.53108		7.91289	4.53108		7.91289	4.53108		7.91289	4.53108		7.91661	4.53348		7.91661	4.53348		7.91661	4.53348		7.91661	4.53348		7.91661	4.53348		7.91661	4.53348		7.91661	4.53348		7.91661	4.53348		7.91661	4.53348		7.91661	4.53348
33		7.90282	4.52314		7.90282	4.52314		7.90282	4.52314		7.90282	4.52314		7.90282	4.52314		7.90282	4.52314		7.90938	4.52739		7.90938	4.52739		7.90938	4.52739		7.90938	4.52739		7.90938	4.52739		7.90938	4.52739		7.90938	4.52739		7.90938	4.52739		7.90938	4.52739		7.90938	4.52739
34		7.89174	4.51456		7.89174	4.51456		7.89174	4.51456		7.89174	4.51456		7.89174	4.51456		7.89174	4.51456		7.90214	4.52128		7.90214	4.52128		7.90214	4.52128		7.90214	4.52128		7.90214	4.52128		7.90214	4.52128		7.90214	4.52128		7.90214	4.52128		7.90214	4.52128		7.90214	4.52128
35		7.87999	4.50554		7.87999	4.50554		7.87999	4.50554		7.87999	4.50554		7.87999	4.50554		7.87999	4.50554		7.89553	4.51559		7.89553	4.51559		7.89553	4.51559		7.89553	4.51559		7.89553	4.51559		7.89553	4.51559		7.89553	4.51559		7.89553	4.51559		7.89553	4.51559		7.89553	4.51559
36		7.86645	4.49538		7.86645	4.49538		7.86645	4.49538		7.86645	4.49538		7.86645	4.49538		7.86645	4.49538		7.88734	4.50889		7.88734	4.50889		7.88734	4.50889		7.88734	4.50889		7.88734	4.50889		7.88734	4.50889		7.8889	4.5099		7.8889	4.5099		7.8889	4.5099		7.8889	4.5099
37		7.85053	4.48369		7.85053	4.48369		7.85053	4.48369		7.85053	4.48369		7.85053	4.48369		7.85053	4.48369		7.87861	4.50183		7.87861	4.50183		7.87861	4.50183		7.87861	4.50183		7.87861	4.50183		7.87861	4.50183		7.88226	4.50419		7.88226	4.50419		7.88226	4.50419		7.88226	4.50419
38		7.83207	4.47036		7.83207	4.47036		7.83207	4.47036		7.83207	4.47036		7.83207	4.47036		7.83207	4.47036		7.86979	4.49474		7.86979	4.49474		7.86979	4.49474		7.86979	4.49474		7.86979	4.49474		7.86979	4.49474		7.87626	4.49892		7.87626	4.49892		7.87626	4.49892		7.87626	4.49892
39		7.80934	4.45427		7.80934	4.45427		7.80934	4.45427		7.80934	4.45427		7.80934	4.45427		7.80934	4.45427		7.86	4.48702		7.86	4.48702		7.86	4.48702		7.86	4.48702		7.86	4.48702		7.86	4.48702		7.87024	4.49363		7.87024	4.49363		7.87024	4.49363		7.87024	4.49363
40		7.7809	4.43449		7.7809	4.43449		7.7809	4.43449		7.7809	4.43449		7.7809	4.43449		7.7809	4.43449		7.8489	4.47845		7.8489	4.47845		7.8489	4.47845		7.8489	4.47845		7.8489	4.47845		7.8489	4.47845		7.86421	4.48834		7.86421	4.48834		7.86421	4.48834		7.86421	4.48834
41		7.8633	4.48641		7.6025	4.22441		7.3767	3.99491		7.1859	3.79791		7.0301	3.63341		6.7569	3.30041		7.8367	4.46919		7.8367	4.46919		7.8367	4.46919		7.8367	4.46919		7.8367	4.46919		7.8367	4.46919		7.85729	4.48249		7.85729	4.48249		7.85729	4.48249		7.85729	4.48249
42		7.8579	4.48154		7.5971	4.21954		7.3713	3.99004		7.1805	3.79304		7.0247	3.62854		6.7515	3.29554		7.82214	4.45841		7.82214	4.45841		7.82214	4.45841		7.82214	4.45841		7.82214	4.45841		7.82214	4.45841		7.84983	4.47629		7.84983	4.47629		7.84983	4.47629		7.84983	4.47629
43		7.85248	4.47666		7.59168	4.21466		7.36588	3.98516		7.17508	3.78816		7.01928	3.62366		6.74608	3.29066		7.80444	4.4456		7.80444	4.4456		7.80444	4.4456		7.80444	4.4456		7.80444	4.4456		7.80444	4.4456		7.84166	4.46964		7.84166	4.46964		7.84166	4.46964		7.84166	4.46964
44		7.84706	4.47178		7.58626	4.20978		7.36046	3.98028		7.16966	3.78328		7.01386	3.61878		6.74066	3.28578		7.78252	4.43007		7.78252	4.43007		7.78252	4.43007		7.78252	4.43007		7.78252	4.43007		7.78252	4.43007		7.83252	4.46236		7.83252	4.46236		7.83252	4.46236		7.83252	4.46236
45		7.84229	4.46734		7.58149	4.20534		7.35569	3.97584		7.16489	3.77884		7.00909	3.61434		6.73589	3.28134		7.7556	4.41131		7.7556	4.41131		7.7556	4.41131		7.7556	4.41131		7.7556	4.41131		7.7556	4.41131		7.82275	4.45468		7.82275	4.45468		7.82275	4.45468		7.82275	4.45468
46		7.83752	4.46289		7.57672	4.20089		7.35092	3.97139		7.16012	3.77439		7.00432	3.60989		6.73112	3.27689		7.83752	4.46289		7.57672	4.20089		7.35092	3.97139		7.16012	3.77439		7.00432	3.60989		6.73112	3.27689		7.81124	4.44589		7.81124	4.44589		7.81124	4.44589		7.81124	4.44589
47		7.8334	4.45887		7.5726	4.19687		7.3468	3.96737		7.156	3.77037		7.0002	3.60587		6.727	3.27287		7.8334	4.45887		7.5726	4.19687		7.3468	3.96737		7.156	3.77037		7.0002	3.60587		6.727	3.27287		7.79806	4.43604		7.79806	4.43604		7.79806	4.43604		7.79806	4.43604
48		7.82927	4.45485		7.56847	4.19285		7.34267	3.96335		7.15187	3.76635		6.99607	3.60185		6.72287	3.26885		7.82927	4.45485		7.56847	4.19285		7.34267	3.96335		7.15187	3.76635		6.99607	3.60185		6.72287	3.26885		7.78176	4.42417		7.78176	4.42417		7.78176	4.42417		7.78176	4.42417
49		7.82514	4.45083		7.56434	4.18883		7.33854	3.95933		7.14774	3.76233		6.99194	3.59783		6.71874	3.26483		7.82514	4.45083		7.56434	4.18883		7.33854	3.95933		7.14774	3.76233		6.99194	3.59783		6.71874	3.26483		7.76128	4.4096		7.76128	4.4096		7.76128	4.4096		7.76128	4.4096
50		7.821	4.44681		7.5602	4.18481		7.3344	3.95531		7.1436	3.75831		6.9878	3.59381		6.7146	3.26081		7.821	4.44681		7.5602	4.18481		7.3344	3.95531		7.1436	3.75831		6.9878	3.59381		6.7146	3.26081		7.7352	4.39142		7.7352	4.39142		7.7352	4.39142		7.7352	4.39142
51		7.81753	4.44323		7.55673	4.18123		7.33093	3.95173		7.14013	3.75473		6.98433	3.59023		6.71113	3.25723		7.81753	4.44323		7.55673	4.18123		7.33093	3.95173		7.14013	3.75473		6.98433	3.59023		6.71113	3.25723		7.81753	4.44323		7.55673	4.18123		7.33093	3.95173		7.14013	3.75473
52		7.81404	4.43964		7.55324	4.17764		7.32744	3.94814		7.13664	3.75114		6.98084	3.58664		6.70764	3.25364		7.81404	4.43964		7.55324	4.17764		7.32744	3.94814		7.13664	3.75114		6.98084	3.58664		6.70764	3.25364		7.81404	4.43964		7.55324	4.17764		7.32744	3.94814		7.13664	3.75114
53		7.81056	4.43605		7.54976	4.17405		7.32396	3.94455		7.13316	3.74755		6.97736	3.58305		6.70416	3.25005		7.81056	4.43605		7.54976	4.17405		7.32396	3.94455		7.13316	3.74755		6.97736	3.58305		6.70416	3.25005		7.81056	4.43605		7.54976	4.17405		7.32396	3.94455		7.13316	3.74755
54		7.80707	4.43247		7.54627	4.17047		7.32047	3.94097		7.12967	3.74397		6.97387	3.57947		6.70067	3.24647		7.80707	4.43247		7.54627	4.17047		7.32047	3.94097		7.12967	3.74397		6.97387	3.57947		6.70067	3.24647		7.80707	4.43247		7.54627	4.17047		7.32047	3.94097		7.12967	3.74397
55		7.80423	4.42931		7.54343	4.16731		7.31763	3.93781		7.12683	3.74081		6.97103	3.57631		6.69783	3.24331		7.80423	4.42931		7.54343	4.16731		7.31763	3.93781		7.12683	3.74081		6.97103	3.57631		6.69783	3.24331		7.80423	4.42931		7.54343	4.16731		7.31763	3.93781		7.12683	3.74081
56		7.8014	4.42616		7.5406	4.16416		7.3148	3.93466		7.124	3.73766		6.9682	3.57316		6.695	3.24016		7.8014	4.42616		7.5406	4.16416		7.3148	3.93466		7.124	3.73766		6.9682	3.57316		6.695	3.24016		7.8014	4.42616		7.5406	4.16416		7.3148	3.93466		7.124	3.73766
57		7.79922	4.42344		7.53842	4.16144		7.31262	3.93194		7.12182	3.73494		6.96602	3.57044		6.69282	3.23744		7.79922	4.42344		7.53842	4.16144		7.31262	3.93194		7.12182	3.73494		6.96602	3.57044		6.69282	3.23744		7.79922	4.42344		7.53842	4.16144		7.31262	3.93194		7.12182	3.73494
58		7.79638	4.42029		7.53558	4.15829		7.30978	3.92879		7.11898	3.73179		6.96318	3.56729		6.68998	3.23429		7.79638	4.42029		7.53558	4.15829		7.30978	3.92879		7.11898	3.73179		6.96318	3.56729		6.68998	3.23429		7.79638	4.42029		7.53558	4.15829		7.30978	3.92879		7.11898	3.73179
59		7.7942	4.41757		7.5334	4.15557		7.3076	3.92607		7.1168	3.72907		6.961	3.56457		6.6878	3.23157		7.7942	4.41757		7.5334	4.15557		7.3076	3.92607		7.1168	3.72907		6.961	3.56457		6.6878	3.23157		7.7942	4.41757		7.5334	4.15557		7.3076	3.92607		7.1168	3.72907
60		7.79201	4.41486		7.53121	4.15286		7.30541	3.92336		7.11461	3.72636		6.95881	3.56186		6.68561	3.22886		7.79201	4.41486		7.53121	4.15286		7.30541	3.92336		7.11461	3.72636		6.95881	3.56186		6.68561	3.22886		7.79201	4.41486		7.53121	4.15286		7.30541	3.92336		7.11461	3.72636
61		7.79048	4.41257		7.52968	4.15057		7.30388	3.92107		7.11308	3.72407		6.95728	3.55957		6.68408	3.22657		7.79048	4.41257		7.52968	4.15057		7.30388	3.92107		7.11308	3.72407		6.95728	3.55957		6.68408	3.22657		7.79048	4.41257		7.52968	4.15057		7.30388	3.92107		7.11308	3.72407
62		7.78829	4.40986		7.52749	4.14786		7.30169	3.91836		7.11089	3.72136		6.95509	3.55686		6.68189	3.22386		7.78829	4.40986		7.52749	4.14786		7.30169	3.91836		7.11089	3.72136		6.95509	3.55686		6.68189	3.22386		7.78829	4.40986		7.52749	4.14786		7.30169	3.91836		7.11089	3.72136
63		7.78676	4.40757		7.52596	4.14557		7.30016	3.91607		7.10936	3.71907		6.95356	3.55457		6.68036	3.22157		7.78676	4.40757		7.52596	4.14557		7.30016	3.91607		7.10936	3.71907		6.95356	3.55457		6.68036	3.22157		7.78676	4.40757		7.52596	4.14557		7.30016	3.91607		7.10936	3.71907
64		7.78522	4.40529		7.52442	4.14329		7.29862	3.91379		7.10782	3.71679		6.95202	3.55229		6.67882	3.21929		7.78522	4.40529		7.52442	4.14329		7.29862	3.91379		7.10782	3.71679		6.95202	3.55229		6.67882	3.21929		7.78522	4.40529		7.52442	4.14329		7.29862	3.91379		7.10782	3.71679
65		7.78435	4.40344		7.52355	4.14144		7.29775	3.91194		7.10695	3.71494		6.95115	3.55044		6.67795	3.21744		7.78435	4.40344		7.52355	4.14144		7.29775	3.91194		7.10695	3.71494		6.95115	3.55044		6.67795	3.21744		7.78435	4.40344		7.52355	4.14144		7.29775	3.91194		7.10695	3.71494
66		7.7828	4.40116		7.522	4.13916		7.2962	3.90966		7.1054	3.71266		6.9496	3.54816		6.6764	3.21516		7.7828	4.40116		7.522	4.13916		7.2962	3.90966		7.1054	3.71266		6.9496	3.54816		6.6764	3.21516		7.7828	4.40116		7.522	4.13916		7.2962	3.90966		7.1054	3.71266
67		7.78192	4.39931		7.52112	4.13731		7.29532	3.90781		7.10452	3.71081		6.94872	3.54631		6.67552	3.21331		7.78192	4.39931		7.52112	4.13731		7.29532	3.90781		7.10452	3.71081		6.94872	3.54631		6.67552	3.21331		7.78192	4.39931		7.52112	4.13731		7.29532	3.90781		7.10452	3.71081
68		7.78103	4.39746		7.52023	4.13546		7.29443	3.90596		7.10363	3.70896		6.94783	3.54446		6.67463	3.21146		7.78103	4.39746		7.52023	4.13546		7.29443	3.90596		7.10363	3.70896		6.94783	3.54446		6.67463	3.21146		7.78103	4.39746		7.52023	4.13546		7.29443	3.90596		7.10363	3.70896
69		7.7808	4.39605		7.52	4.13405		7.2942	3.90455		7.1034	3.70755		6.9476	3.54305		6.6744	3.21005		7.7808	4.39605		7.52	4.13405		7.2942	3.90455		7.1034	3.70755		6.9476	3.54305		6.6744	3.21005		7.7808	4.39605		7.52	4.13405		7.2942	3.90455		7.1034	3.70755
70		7.77991	4.3942		7.51911	4.1322		7.29331	3.9027		7.10251	3.7057		6.94671	3.5412		6.67351	3.2082		7.77991	4.3942		7.51911	4.1322		7.29331	3.9027		7.10251	3.7057		6.94671	3.5412		6.67351	3.2082		7.77991	4.3942		7.51911	4.1322		7.29331	3.9027		7.10251	3.7057
71		7.77968	4.39279		7.51888	4.13079		7.29308	3.90129		7.10228	3.70429		6.94648	3.53979		6.67328	3.20679		7.77968	4.39279		7.51888	4.13079		7.29308	3.90129		7.10228	3.70429		6.94648	3.53979		6.67328	3.20679		7.77968	4.39279		7.51888	4.13079		7.29308	3.90129		7.10228	3.70429
72		7.77944	4.39137		7.51864	4.12937		7.29284	3.89987		7.10204	3.70287		6.94624	3.53837		6.67304	3.20537		7.77944	4.39137		7.51864	4.12937		7.29284	3.89987		7.10204	3.70287		6.94624	3.53837		6.67304	3.20537		7.77944	4.39137		7.51864	4.12937		7.29284	3.89987		7.10204	3.70287
73		7.77919	4.38996		7.51839	4.12796		7.29259	3.89846		7.10179	3.70146		6.94599	3.53696		6.67279	3.20396		7.77919	4.38996		7.51839	4.12796		7.29259	3.89846		7.10179	3.70146		6.94599	3.53696		6.67279	3.20396		7.77919	4.38996		7.51839	4.12796		7.29259	3.89846		7.10179	3.70146
74		7.77961	4.38898		7.51881	4.12698		7.29301	3.89748		7.10221	3.70048		6.94641	3.53598		6.67321	3.20298		7.77961	4.38898		7.51881	4.12698		7.29301	3.89748		7.10221	3.70048		6.94641	3.53598		6.67321	3.20298		7.77961	4.38898		7.51881	4.12698		7.29301	3.89748		7.10221	3.70048
75		7.77936	4.38757		7.51856	4.12557		7.29276	3.89607		7.10196	3.69907		6.94616	3.53457		6.67296	3.20157		7.77936	4.38757		7.51856	4.12557		7.29276	3.89607		7.10196	3.69907		6.94616	3.53457		6.67296	3.20157		7.77936	4.38757		7.51856	4.12557		7.29276	3.89607		7.10196	3.69907
76		7.77976	4.38658		7.51896	4.12458		7.29316	3.89508		7.10236	3.69808		6.94656	3.53358		6.67336	3.20058		7.77976	4.38658		7.51896	4.12458		7.29316	3.89508		7.10236	3.69808		6.94656	3.53358		6.67336	3.20058		7.77976	4.38658		7.51896	4.12458		7.29316	3.89508		7.10236	3.69808
77		7.78017	4.3856		7.51937	4.1236		7.29357	3.8941		7.10277	3.6971		6.94697	3.5326		6.67377	3.1996		7.78017	4.3856		7.51937	4.1236		7.29357	3.8941		7.10277	3.6971		6.94697	3.5326		6.67377	3.1996		7.78017	4.3856		7.51937	4.1236		7.29357	3.8941		7.10277	3.6971
78		7.78122	4.38505		7.52042	4.12305		7.29462	3.89355		7.10382	3.69655		6.94802	3.53205		6.67482	3.19905		7.78122	4.38505		7.52042	4.12305		7.29462	3.89355		7.10382	3.69655		6.94802	3.53205		6.67482	3.19905		7.78122	4.38505		7.52042	4.12305		7.29462	3.89355		7.10382	3.69655
79		7.78162	4.38407		7.52082	4.12207		7.29502	3.89257		7.10422	3.69557		6.94842	3.53107		6.67522	3.19807		7.78162	4.38407		7.52082	4.12207		7.29502	3.89257		7.10422	3.69557		6.94842	3.53107		6.67522	3.19807		7.78162	4.38407		7.52082	4.12207		7.29502	3.89257		7.10422	3.69557
80		7.78267	4.38352		7.52187	4.12152		7.29607	3.89202		7.10527	3.69502		6.94947	3.53052		6.67627	3.19752		7.78267	4.38352		7.52187	4.12152		7.29607	3.89202		7.10527	3.69502		6.94947	3.53052		6.67627	3.19752		7.78267	4.38352		7.52187	4.12152		7.29607	3.89202		7.10527	3.69502
81		7.79993	4.38924		7.53913	4.12724		7.31333	3.89774		7.12253	3.70074		6.96673	3.53624		6.69353	3.20324		7.79993	4.38924		7.53913	4.12724		7.31333	3.89774		7.12253	3.70074		6.96673	3.53624		6.69353	3.20324		7.79993	4.38924		7.53913	4.12724		7.31333	3.89774		7.12253	3.70074
82		7.80099	4.38871		7.54019	4.12671		7.31439	3.89721		7.12359	3.70021		6.96779	3.53571		6.69459	3.20271		7.80099	4.38871		7.54019	4.12671		7.31439	3.89721		7.12359	3.70021		6.96779	3.53571		6.69459	3.20271		7.80099	4.38871		7.54019	4.12671		7.31439	3.89721		7.12359	3.70021
83		7.80205	4.38817		7.54125	4.12617		7.31545	3.89667		7.12465	3.69967		6.96885	3.53517		6.69565	3.20217		7.80205	4.38817		7.54125	4.12617		7.31545	3.89667		7.12465	3.69967		6.96885	3.53517		6.69565	3.20217		7.80205	4.38817		7.54125	4.12617		7.31545	3.89667		7.12465	3.69967
84		7.8031	4.38764		7.5423	4.12564		7.3165	3.89614		7.1257	3.69914		6.9699	3.53464		6.6967	3.20164		7.8031	4.38764		7.5423	4.12564		7.3165	3.89614		7.1257	3.69914		6.9699	3.53464		6.6967	3.20164		7.8031	4.38764		7.5423	4.12564		7.3165	3.89614		7.1257	3.69914
85		7.8048	4.38753		7.544	4.12553		7.3182	3.89603		7.1274	3.69903		6.9716	3.53453		6.6984	3.20153		7.8048	4.38753		7.544	4.12553		7.3182	3.89603		7.1274	3.69903		6.9716	3.53453		6.6984	3.20153		7.8048	4.38753		7.544	4.12553		7.3182	3.89603		7.1274	3.69903
86		7.80649	4.38742		7.54569	4.12542		7.31989	3.89592		7.12909	3.69892		6.97329	3.53442		6.70009	3.20142		7.80649	4.38742		7.54569	4.12542		7.31989	3.89592		7.12909	3.69892		6.97329	3.53442		6.70009	3.20142		7.80649	4.38742		7.54569	4.12542		7.31989	3.89592		7.12909	3.69892
87		7.80818	4.38731		7.54738	4.12531		7.32158	3.89581		7.13078	3.69881		6.97498	3.53431		6.70178	3.20131		7.80818	4.38731		7.54738	4.12531		7.32158	3.89581		7.13078	3.69881		6.97498	3.53431		6.70178	3.20131		7.80818	4.38731		7.54738	4.12531		7.32158	3.89581		7.13078	3.69881
88		7.80987	4.3872		7.54907	4.1252		7.32327	3.8957		7.13247	3.6987		6.97667	3.5342		6.70347	3.2012		7.80987	4.3872		7.54907	4.1252		7.32327	3.8957		7.13247	3.6987		6.97667	3.5342		6.70347	3.2012		7.80987	4.3872		7.54907	4.1252		7.32327	3.8957		7.13247	3.6987
89		7.81155	4.38709		7.55075	4.12509		7.32495	3.89559		7.13415	3.69859		6.97835	3.53409		6.70515	3.20109		7.81155	4.38709		7.55075	4.12509		7.32495	3.89559		7.13415	3.69859		6.97835	3.53409		6.70515	3.20109		7.81155	4.38709		7.55075	4.12509		7.32495	3.89559		7.13415	3.69859
90		7.81322	4.38698		7.55242	4.12498		7.32662	3.89548		7.13582	3.69848		6.98002	3.53398		6.70682	3.20098		7.81322	4.38698		7.55242	4.12498		7.32662	3.89548		7.13582	3.69848		6.98002	3.53398		6.70682	3.20098		7.81322	4.38698		7.55242	4.12498		7.32662	3.89548		7.13582	3.69848
91		7.81554	4.3873		7.55474	4.1253		7.32894	3.8958		7.13814	3.6988		6.98234	3.5343		6.70914	3.2013		7.81554	4.3873		7.55474	4.1253		7.32894	3.8958		7.13814	3.6988		6.98234	3.5343		6.70914	3.2013		7.81554	4.3873		7.55474	4.1253		7.32894	3.8958		7.13814	3.6988
92		7.81721	4.38718		7.55641	4.12518		7.33061	3.89568		7.13981	3.69868		6.98401	3.53418		6.71081	3.20118		7.81721	4.38718		7.55641	4.12518		7.33061	3.89568		7.13981	3.69868		6.98401	3.53418		6.71081	3.20118		7.81721	4.38718		7.55641	4.12518		7.33061	3.89568		7.13981	3.69868
93		7.81952	4.3875		7.55872	4.1255		7.33292	3.896		7.14212	3.699		6.98632	3.5345		6.71312	3.2015		7.81952	4.3875		7.55872	4.1255		7.33292	3.896		7.14212	3.699		6.98632	3.5345		6.71312	3.2015		7.81952	4.3875		7.55872	4.1255		7.33292	3.896		7.14212	3.699
94		7.82182	4.38781		7.56102	4.12581		7.33522	3.89631		7.14442	3.69931		6.98862	3.53481		6.71542	3.20181		7.82182	4.38781		7.56102	4.12581		7.33522	3.89631		7.14442	3.69931		6.98862	3.53481		6.71542	3.20181		7.82182	4.38781		7.56102	4.12581		7.33522	3.89631		7.14442	3.69931
95		7.82412	4.38812		7.56332	4.12612		7.33752	3.89662		7.14672	3.69962		6.99092	3.53512		6.71772	3.20212		7.82412	4.38812		7.56332	4.12612		7.33752	3.89662		7.14672	3.69962		6.99092	3.53512		6.71772	3.20212		7.82412	4.38812		7.56332	4.12612		7.33752	3.89662		7.14672	3.69962
96		7.82706	4.38885		7.56626	4.12685		7.34046	3.89735		7.14966	3.70035		6.99386	3.53585		6.72066	3.20285		7.82706	4.38885		7.56626	4.12685		7.34046	3.89735		7.14966	3.70035		6.99386	3.53585		6.72066	3.20285		7.82706	4.38885		7.56626	4.12685		7.34046	3.89735		7.14966	3.70035
97		7.82935	4.38916		7.56855	4.12716		7.34275	3.89766		7.15195	3.70066		6.99615	3.53616		6.72295	3.20316		7.82935	4.38916		7.56855	4.12716		7.34275	3.89766		7.15195	3.70066		6.99615	3.53616		6.72295	3.20316		7.82935	4.38916		7.56855	4.12716		7.34275	3.89766		7.15195	3.70066
98		7.83228	4.38989		7.57148	4.12789		7.34568	3.89839		7.15488	3.70139		6.99908	3.53689		6.72588	3.20389		7.83228	4.38989		7.57148	4.12789		7.34568	3.89839		7.15488	3.70139		6.99908	3.53689		6.72588	3.20389		7.83228	4.38989		7.57148	4.12789		7.34568	3.89839		7.15488	3.70139
99		7.83456	4.3902		7.57376	4.1282		7.34796	3.8987		7.15716	3.7017		7.00136	3.5372		6.72816	3.2042		7.83456	4.3902		7.57376	4.1282		7.34796	3.8987		7.15716	3.7017		7.00136	3.5372		6.72816	3.2042		7.83456	4.3902		7.57376	4.1282		7.34796	3.8987		7.15716	3.7017
100		7.83748	4.39093		7.57668	4.12893		7.35088	3.89943		7.16008	3.70243		7.00428	3.53793		6.73108	3.20493		7.83748	4.39093		7.57668	4.12893		7.35088	3.89943		7.16008	3.70243		7.00428	3.53793		6.73108	3.20493		7.83748	4.39093		7.57668	4.12893		7.35088	3.89943		7.16008	3.70243
101		7.84039	4.39166		7.57959	4.12966		7.35379	3.90016		7.16299	3.70316		7.00719	3.53866		6.73399	3.20566		7.84039	4.39166		7.57959	4.12966		7.35379	3.90016		7.16299	3.70316		7.00719	3.53866		6.73399	3.20566		7.84039	4.39166		7.57959	4.12966		7.35379	3.90016		7.16299	3.70316
102		7.8433	4.39238		7.5825	4.13038		7.3567	3.90088		7.1659	3.70388		7.0101	3.53938		6.7369	3.20638		7.8433	4.39238		7.5825	4.13038		7.3567	3.90088		7.1659	3.70388		7.0101	3.53938		6.7369	3.20638		7.8433	4.39238		7.5825	4.13038		7.3567	3.90088		7.1659	3.70388
103		7.8462	4.39311		7.5854	4.13111		7.3596	3.90161		7.1688	3.70461		7.013	3.54011		6.7398	3.20711		7.8462	4.39311		7.5854	4.13111		7.3596	3.90161		7.1688	3.70461		7.013	3.54011		6.7398	3.20711		7.8462	4.39311		7.5854	4.13111		7.3596	3.90161		7.1688	3.70461
104		7.84909	4.39383		7.58829	4.13183		7.36249	3.90233		7.17169	3.70533		7.01589	3.54083		6.74269	3.20783		7.84909	4.39383		7.58829	4.13183		7.36249	3.90233		7.17169	3.70533		7.01589	3.54083		6.74269	3.20783		7.84909	4.39383		7.58829	4.13183		7.36249	3.90233		7.17169	3.70533
105		7.85198	4.39455		7.59118	4.13255		7.36538	3.90305		7.17458	3.70605		7.01878	3.54155		6.74558	3.20855		7.85198	4.39455		7.59118	4.13255		7.36538	3.90305		7.17458	3.70605		7.01878	3.54155		6.74558	3.20855		7.85198	4.39455		7.59118	4.13255		7.36538	3.90305		7.17458	3.70605
106		7.85551	4.3957		7.59471	4.1337		7.36891	3.9042		7.17811	3.7072		7.02231	3.5427		6.74911	3.2097		7.85551	4.3957		7.59471	4.1337		7.36891	3.9042		7.17811	3.7072		7.02231	3.5427		6.74911	3.2097		7.85551	4.3957		7.59471	4.1337		7.36891	3.9042		7.17811	3.7072
107		7.85839	4.39642		7.59759	4.13442		7.37179	3.90492		7.18099	3.70792		7.02519	3.54342		6.75199	3.21042		7.85839	4.39642		7.59759	4.13442		7.37179	3.90492		7.18099	3.70792		7.02519	3.54342		6.75199	3.21042		7.85839	4.39642		7.59759	4.13442		7.37179	3.90492		7.18099	3.70792
108		7.86191	4.39756		7.60111	4.13556		7.37531	3.90606		7.18451	3.70906		7.02871	3.54456		6.75551	3.21156		7.86191	4.39756		7.60111	4.13556		7.37531	3.90606		7.18451	3.70906		7.02871	3.54456		6.75551	3.21156		7.86191	4.39756		7.60111	4.13556		7.37531	3.90606		7.18451	3.70906
109		7.86478	4.39828		7.60398	4.13628		7.37818	3.90678		7.18738	3.70978		7.03158	3.54528		6.75838	3.21228		7.86478	4.39828		7.60398	4.13628		7.37818	3.90678		7.18738	3.70978		7.03158	3.54528		6.75838	3.21228		7.86478	4.39828		7.60398	4.13628		7.37818	3.90678		7.18738	3.70978
110		7.86828	4.39942		7.60748	4.13742		7.38168	3.90792		7.19088	3.71092		7.03508	3.54642		6.76188	3.21342		7.86828	4.39942		7.60748	4.13742		7.38168	3.90792		7.19088	3.71092		7.03508	3.54642		6.76188	3.21342		7.86828	4.39942		7.60748	4.13742		7.38168	3.90792		7.19088	3.71092
111		7.87178	4.40056		7.61098	4.13856		7.38518	3.90906		7.19438	3.71206		7.03858	3.54756		6.76538	3.21456		7.87178	4.40056		7.61098	4.13856		7.38518	3.90906		7.19438	3.71206		7.03858	3.54756		6.76538	3.21456		7.87178	4.40056		7.61098	4.13856		7.38518	3.90906		7.19438	3.71206
112		7.87528	4.4017		7.61448	4.1397		7.38868	3.9102		7.19788	3.7132		7.04208	3.5487		6.76888	3.2157		7.87528	4.4017		7.61448	4.1397		7.38868	3.9102		7.19788	3.7132		7.04208	3.5487		6.76888	3.2157		7.87528	4.4017		7.61448	4.1397		7.38868	3.9102		7.19788	3.7132
113		7.87876	4.40283		7.61796	4.14083		7.39216	3.91133		7.20136	3.71433		7.04556	3.54983		6.77236	3.21683		7.87876	4.40283		7.61796	4.14083		7.39216	3.91133		7.20136	3.71433		7.04556	3.54983		6.77236	3.21683		7.87876	4.40283		7.61796	4.14083		7.39216	3.91133		7.20136	3.71433
114		7.88225	4.40396		7.62145	4.14196		7.39565	3.91246		7.20485	3.71546		7.04905	3.55096		6.77585	3.21796		7.88225	4.40396		7.62145	4.14196		7.39565	3.91246		7.20485	3.71546		7.04905	3.55096		6.77585	3.21796		7.88225	4.40396		7.62145	4.14196		7.39565	3.91246		7.20485	3.71546
115		7.88572	4.4051		7.62492	4.1431		7.39912	3.9136		7.20832	3.7166		7.05252	3.5521		6.77932	3.2191		7.88572	4.4051		7.62492	4.1431		7.39912	3.9136		7.20832	3.7166		7.05252	3.5521		6.77932	3.2191		7.88572	4.4051		7.62492	4.1431		7.39912	3.9136		7.20832	3.7166
116		7.88919	4.40623		7.62839	4.14423		7.40259	3.91473		7.21179	3.71773		7.05599	3.55323		6.78279	3.22023		7.88919	4.40623		7.62839	4.14423		7.40259	3.91473		7.21179	3.71773		7.05599	3.55323		6.78279	3.22023		7.88919	4.40623		7.62839	4.14423		7.40259	3.91473		7.21179	3.71773
117		7.89266	4.40736		7.63186	4.14536		7.40606	3.91586		7.21526	3.71886		7.05946	3.55436		6.78626	3.22136		7.89266	4.40736		7.63186	4.14536		7.40606	3.91586		7.21526	3.71886		7.05946	3.55436		6.78626	3.22136		7.89266	4.40736		7.63186	4.14536		7.40606	3.91586		7.21526	3.71886
118		7.89612	4.40848		7.63532	4.14648		7.40952	3.91698		7.21872	3.71998		7.06292	3.55548		6.78972	3.22248		7.89612	4.40848		7.63532	4.14648		7.40952	3.91698		7.21872	3.71998		7.06292	3.55548		6.78972	3.22248		7.89612	4.40848		7.63532	4.14648		7.40952	3.91698		7.21872	3.71998
119		7.90021	4.41003		7.63941	4.14803		7.41361	3.91853		7.22281	3.72153		7.06701	3.55703		6.79381	3.22403		7.90021	4.41003		7.63941	4.14803		7.41361	3.91853		7.22281	3.72153		7.06701	3.55703		6.79381	3.22403		7.90021	4.41003		7.63941	4.14803		7.41361	3.91853		7.22281	3.72153
120		7.90366	4.41116		7.64286	4.14916		7.41706	3.91966		7.22626	3.72266		7.07046	3.55816		6.79726	3.22516		7.90366	4.41116		7.64286	4.14916		7.41706	3.91966		7.22626	3.72266		7.07046	3.55816		6.79726	3.22516		7.90366	4.41116		7.64286	4.14916		7.41706	3.91966		7.22626	3.72266
BEHE		LAB at 60 km																		LAB at 65 km																		LAB at 70 km
		no melt			melt 0.5%			melt 1%			melt 1.5%			melt 2%			melt 4%			no melt			melt 0.5%			melt 1%			melt 1.5%			melt 2%			melt 4%			no melt			melt 0.5%			melt 1%			melt 1.5%
Depth		Vp	Vs		Vp	Vs		Vp	Vs		Vp	Vs		Vp	Vs		Vp	Vs		Vp	Vs		Vp	Vs		Vp	Vs		Vp	Vs		Vp	Vs		Vp	Vs		Vp	Vs		Vp	Vs		Vp	Vs		Vp	Vs
1		2.18	1.22		2.18	1.22		2.18	1.22		2.18	1.22		2.18	1.22		2.18	1.22		2.18	1.22		2.18	1.22		2.18	1.22		2.18	1.22		2.18	1.22		2.18	1.22		2.18	1.22		2.18	1.22		2.18	1.22		2.18	1.22
2		4.6	2.57		4.6	2.57		4.6	2.57		4.6	2.57		4.6	2.57		4.6	2.57		4.6	2.57		4.6	2.57		4.6	2.57		4.6	2.57		4.6	2.57		4.6	2.57		4.6	2.57		4.6	2.57		4.6	2.57		4.6	2.57
3		4.94594	2.82354		4.94594	2.82354		4.94594	2.82354		4.94594	2.82354		4.94594	2.82354		4.94594	2.82354		4.94594	2.82354		4.94594	2.82354		4.94594	2.82354		4.94594	2.82354		4.94594	2.82354		4.94594	2.82354		4.94594	2.82354		4.94594	2.82354		4.94594	2.82354		4.94594	2.82354
4		5.29187	3.07708		5.29187	3.07708		5.29187	3.07708		5.29187	3.07708		5.29187	3.07708		5.29187	3.07708		5.29187	3.07708		5.29187	3.07708		5.29187	3.07708		5.29187	3.07708		5.29187	3.07708		5.29187	3.07708		5.29187	3.07708		5.29187	3.07708		5.29187	3.07708		5.29187	3.07708
5		5.63781	3.33061		5.63781	3.33061		5.63781	3.33061		5.63781	3.33061		5.63781	3.33061		5.63781	3.33061		5.63781	3.33061		5.63781	3.33061		5.63781	3.33061		5.63781	3.33061		5.63781	3.33061		5.63781	3.33061		5.63781	3.33061		5.63781	3.33061		5.63781	3.33061		5.63781	3.33061
6		5.98374	3.58415		5.98374	3.58415		5.98374	3.58415		5.98374	3.58415		5.98374	3.58415		5.98374	3.58415		5.98374	3.58415		5.98374	3.58415		5.98374	3.58415		5.98374	3.58415		5.98374	3.58415		5.98374	3.58415		5.98374	3.58415		5.98374	3.58415		5.98374	3.58415		5.98374	3.58415
7		5.99906	3.58871		5.99906	3.58871		5.99906	3.58871		5.99906	3.58871		5.99906	3.58871		5.99906	3.58871		5.99906	3.58871		5.99906	3.58871		5.99906	3.58871		5.99906	3.58871		5.99906	3.58871		5.99906	3.58871		5.99906	3.58871		5.99906	3.58871		5.99906	3.58871		5.99906	3.58871
8		6.01438	3.59327		6.01438	3.59327		6.01438	3.59327		6.01438	3.59327		6.01438	3.59327		6.01438	3.59327		6.01438	3.59327		6.01438	3.59327		6.01438	3.59327		6.01438	3.59327		6.01438	3.59327		6.01438	3.59327		6.01438	3.59327		6.01438	3.59327		6.01438	3.59327		6.01438	3.59327
9		6.04954	3.60446		6.04954	3.60446		6.04954	3.60446		6.04954	3.60446		6.04954	3.60446		6.04954	3.60446		6.04954	3.60446		6.04954	3.60446		6.04954	3.60446		6.04954	3.60446		6.04954	3.60446		6.04954	3.60446		6.04954	3.60446		6.04954	3.60446		6.04954	3.60446		6.04954	3.60446
10		6.08471	3.61565		6.08471	3.61565		6.08471	3.61565		6.08471	3.61565		6.08471	3.61565		6.08471	3.61565		6.08471	3.61565		6.08471	3.61565		6.08471	3.61565		6.08471	3.61565		6.08471	3.61565		6.08471	3.61565		6.08471	3.61565		6.08471	3.61565		6.08471	3.61565		6.08471	3.61565
11		6.16414	3.63732		6.16414	3.63732		6.16414	3.63732		6.16414	3.63732		6.16414	3.63732		6.16414	3.63732		6.16414	3.63732		6.16414	3.63732		6.16414	3.63732		6.16414	3.63732		6.16414	3.63732		6.16414	3.63732		6.16414	3.63732		6.16414	3.63732		6.16414	3.63732		6.16414	3.63732
12		6.24358	3.65899		6.24358	3.65899		6.24358	3.65899		6.24358	3.65899		6.24358	3.65899		6.24358	3.65899		6.24358	3.65899		6.24358	3.65899		6.24358	3.65899		6.24358	3.65899		6.24358	3.65899		6.24358	3.65899		6.24358	3.65899		6.24358	3.65899		6.24358	3.65899		6.24358	3.65899
13		6.32301	3.68066		6.32301	3.68066		6.32301	3.68066		6.32301	3.68066		6.32301	3.68066		6.32301	3.68066		6.32301	3.68066		6.32301	3.68066		6.32301	3.68066		6.32301	3.68066		6.32301	3.68066		6.32301	3.68066		6.32301	3.68066		6.32301	3.68066		6.32301	3.68066		6.32301	3.68066
14		6.45373	3.7145		6.45373	3.7145		6.45373	3.7145		6.45373	3.7145		6.45373	3.7145		6.45373	3.7145		6.45373	3.7145		6.45373	3.7145		6.45373	3.7145		6.45373	3.7145		6.45373	3.7145		6.45373	3.7145		6.45373	3.7145		6.45373	3.7145		6.45373	3.7145		6.45373	3.7145
15		6.58444	3.74834		6.58444	3.74834		6.58444	3.74834		6.58444	3.74834		6.58444	3.74834		6.58444	3.74834		6.58444	3.74834		6.58444	3.74834		6.58444	3.74834		6.58444	3.74834		6.58444	3.74834		6.58444	3.74834		6.58444	3.74834		6.58444	3.74834		6.58444	3.74834		6.58444	3.74834
16		6.71515	3.78217		6.71515	3.78217		6.71515	3.78217		6.71515	3.78217		6.71515	3.78217		6.71515	3.78217		6.71515	3.78217		6.71515	3.78217		6.71515	3.78217		6.71515	3.78217		6.71515	3.78217		6.71515	3.78217		6.71515	3.78217		6.71515	3.78217		6.71515	3.78217		6.71515	3.78217
17		6.84711	3.8442		6.84711	3.8442		6.84711	3.8442		6.84711	3.8442		6.84711	3.8442		6.84711	3.8442		6.84711	3.8442		6.84711	3.8442		6.84711	3.8442		6.84711	3.8442		6.84711	3.8442		6.84711	3.8442		6.84711	3.8442		6.84711	3.8442		6.84711	3.8442		6.84711	3.8442
18		6.97907	3.90623		6.97907	3.90623		6.97907	3.90623		6.97907	3.90623		6.97907	3.90623		6.97907	3.90623		6.97907	3.90623		6.97907	3.90623		6.97907	3.90623		6.97907	3.90623		6.97907	3.90623		6.97907	3.90623		6.97907	3.90623		6.97907	3.90623		6.97907	3.90623		6.97907	3.90623
19		7.11103	3.96826		7.11103	3.96826		7.11103	3.96826		7.11103	3.96826		7.11103	3.96826		7.11103	3.96826		7.11103	3.96826		7.11103	3.96826		7.11103	3.96826		7.11103	3.96826		7.11103	3.96826		7.11103	3.96826		7.11103	3.96826		7.11103	3.96826		7.11103	3.96826		7.11103	3.96826
20		7.24299	4.03028		7.24299	4.03028		7.24299	4.03028		7.24299	4.03028		7.24299	4.03028		7.24299	4.03028		7.24299	4.03028		7.24299	4.03028		7.24299	4.03028		7.24299	4.03028		7.24299	4.03028		7.24299	4.03028		7.24299	4.03028		7.24299	4.03028		7.24299	4.03028		7.24299	4.03028
21		7.35177	4.09603		7.35177	4.09603		7.35177	4.09603		7.35177	4.09603		7.35177	4.09603		7.35177	4.09603		7.35177	4.09603		7.35177	4.09603		7.35177	4.09603		7.35177	4.09603		7.35177	4.09603		7.35177	4.09603		7.35177	4.09603		7.35177	4.09603		7.35177	4.09603		7.35177	4.09603
22		7.46055	4.16178		7.46055	4.16178		7.46055	4.16178		7.46055	4.16178		7.46055	4.16178		7.46055	4.16178		7.46055	4.16178		7.46055	4.16178		7.46055	4.16178		7.46055	4.16178		7.46055	4.16178		7.46055	4.16178		7.46055	4.16178		7.46055	4.16178		7.46055	4.16178		7.46055	4.16178
23		7.56933	4.22752		7.56933	4.22752		7.56933	4.22752		7.56933	4.22752		7.56933	4.22752		7.56933	4.22752		7.56933	4.22752		7.56933	4.22752		7.56933	4.22752		7.56933	4.22752		7.56933	4.22752		7.56933	4.22752		7.56933	4.22752		7.56933	4.22752		7.56933	4.22752		7.56933	4.22752
24		7.98167	4.58724		7.98167	4.58724		7.98167	4.58724		7.98167	4.58724		7.98167	4.58724		7.98167	4.58724		7.98167	4.58724		7.98167	4.58724		7.98167	4.58724		7.98167	4.58724		7.98167	4.58724		7.98167	4.58724		7.98167	4.58724		7.98167	4.58724		7.98167	4.58724		7.98167	4.58724
25		7.9728	4.58001		7.9728	4.58001		7.9728	4.58001		7.9728	4.58001		7.9728	4.58001		7.9728	4.58001		7.9728	4.58001		7.9728	4.58001		7.9728	4.58001		7.9728	4.58001		7.9728	4.58001		7.9728	4.58001		7.9728	4.58001		7.9728	4.58001		7.9728	4.58001		7.9728	4.58001
26		7.96451	4.57318		7.96451	4.57318		7.96451	4.57318		7.96451	4.57318		7.96451	4.57318		7.96451	4.57318		7.96451	4.57318		7.96451	4.57318		7.96451	4.57318		7.96451	4.57318		7.96451	4.57318		7.96451	4.57318		7.96451	4.57318		7.96451	4.57318		7.96451	4.57318		7.96451	4.57318
27		7.95618	4.56632		7.95618	4.56632		7.95618	4.56632		7.95618	4.56632		7.95618	4.56632		7.95618	4.56632		7.95618	4.56632		7.95618	4.56632		7.95618	4.56632		7.95618	4.56632		7.95618	4.56632		7.95618	4.56632		7.95618	4.56632		7.95618	4.56632		7.95618	4.56632		7.95618	4.56632
28		7.94782	4.55945		7.94782	4.55945		7.94782	4.55945		7.94782	4.55945		7.94782	4.55945		7.94782	4.55945		7.94782	4.55945		7.94782	4.55945		7.94782	4.55945		7.94782	4.55945		7.94782	4.55945		7.94782	4.55945		7.94782	4.55945		7.94782	4.55945		7.94782	4.55945		7.94782	4.55945
29		7.93941	4.55255		7.93941	4.55255		7.93941	4.55255		7.93941	4.55255		7.93941	4.55255		7.93941	4.55255		7.93941	4.55255		7.93941	4.55255		7.93941	4.55255		7.93941	4.55255		7.93941	4.55255		7.93941	4.55255		7.93941	4.55255		7.93941	4.55255		7.93941	4.55255		7.93941	4.55255
30		7.93162	4.54607		7.93162	4.54607		7.93162	4.54607		7.93162	4.54607		7.93162	4.54607		7.93162	4.54607		7.93162	4.54607		7.93162	4.54607		7.93162	4.54607		7.93162	4.54607		7.93162	4.54607		7.93162	4.54607		7.93162	4.54607		7.93162	4.54607		7.93162	4.54607		7.93162	4.54607
31		7.9238	4.53957		7.9238	4.53957		7.9238	4.53957		7.9238	4.53957		7.9238	4.53957		7.9238	4.53957		7.9238	4.53957		7.9238	4.53957		7.9238	4.53957		7.9238	4.53957		7.9238	4.53957		7.9238	4.53957		7.9238	4.53957		7.9238	4.53957		7.9238	4.53957		7.9238	4.53957
32		7.91661	4.53348		7.91661	4.53348		7.91661	4.53348		7.91661	4.53348		7.91661	4.53348		7.91661	4.53348		7.91661	4.53348		7.91661	4.53348		7.91661	4.53348		7.91661	4.53348		7.91661	4.53348		7.91661	4.53348		7.91661	4.53348		7.91661	4.53348		7.91661	4.53348		7.91661	4.53348
33		7.90938	4.52739		7.90938	4.52739		7.90938	4.52739		7.90938	4.52739		7.90938	4.52739		7.90938	4.52739		7.90938	4.52739		7.90938	4.52739		7.90938	4.52739		7.90938	4.52739		7.90938	4.52739		7.90938	4.52739		7.90938	4.52739		7.90938	4.52739		7.90938	4.52739		7.90938	4.52739
34		7.90214	4.52128		7.90214	4.52128		7.90214	4.52128		7.90214	4.52128		7.90214	4.52128		7.90214	4.52128		7.90214	4.52128		7.90214	4.52128		7.90214	4.52128		7.90214	4.52128		7.90214	4.52128		7.90214	4.52128		7.90214	4.52128		7.90214	4.52128		7.90214	4.52128		7.90214	4.52128
35		7.89553	4.51559		7.89553	4.51559		7.89553	4.51559		7.89553	4.51559		7.89553	4.51559		7.89553	4.51559		7.89553	4.51559		7.89553	4.51559		7.89553	4.51559		7.89553	4.51559		7.89553	4.51559		7.89553	4.51559		7.89553	4.51559		7.89553	4.51559		7.89553	4.51559		7.89553	4.51559
36		7.8889	4.5099		7.8889	4.5099		7.8889	4.5099		7.8889	4.5099		7.8889	4.5099		7.8889	4.5099		7.8889	4.5099		7.8889	4.5099		7.8889	4.5099		7.8889	4.5099		7.8889	4.5099		7.8889	4.5099		7.8889	4.5099		7.8889	4.5099		7.8889	4.5099		7.8889	4.5099
37		7.88226	4.50419		7.88226	4.50419		7.88226	4.50419		7.88226	4.50419		7.88226	4.50419		7.88226	4.50419		7.88226	4.50419		7.88226	4.50419		7.88226	4.50419		7.88226	4.50419		7.88226	4.50419		7.88226	4.50419		7.88226	4.50419		7.88226	4.50419		7.88226	4.50419		7.88226	4.50419
38		7.87626	4.49892		7.87626	4.49892		7.87626	4.49892		7.87626	4.49892		7.87626	4.49892		7.87626	4.49892		7.87626	4.49892		7.87626	4.49892		7.87626	4.49892		7.87626	4.49892		7.87626	4.49892		7.87626	4.49892		7.87626	4.49892		7.87626	4.49892		7.87626	4.49892		7.87626	4.49892
39		7.87024	4.49363		7.87024	4.49363		7.87024	4.49363		7.87024	4.49363		7.87024	4.49363		7.87024	4.49363		7.87024	4.49363		7.87024	4.49363		7.87024	4.49363		7.87024	4.49363		7.87024	4.49363		7.87024	4.49363		7.87024	4.49363		7.87024	4.49363		7.87024	4.49363		7.87024	4.49363
40		7.86421	4.48834		7.86421	4.48834		7.86421	4.48834		7.86421	4.48834		7.86421	4.48834		7.86421	4.48834		7.86421	4.48834		7.86421	4.48834		7.86421	4.48834		7.86421	4.48834		7.86421	4.48834		7.86421	4.48834		7.86421	4.48834		7.86421	4.48834		7.86421	4.48834		7.86421	4.48834
41		7.85883	4.48348		7.85883	4.48348		7.85883	4.48348		7.85883	4.48348		7.85883	4.48348		7.85883	4.48348		7.85883	4.48348		7.85883	4.48348		7.85883	4.48348		7.85883	4.48348		7.85883	4.48348		7.85883	4.48348		7.85883	4.48348		7.85883	4.48348		7.85883	4.48348		7.85883	4.48348
42		7.85344	4.47862		7.85344	4.47862		7.85344	4.47862		7.85344	4.47862		7.85344	4.47862		7.85344	4.47862		7.85344	4.47862		7.85344	4.47862		7.85344	4.47862		7.85344	4.47862		7.85344	4.47862		7.85344	4.47862		7.85344	4.47862		7.85344	4.47862		7.85344	4.47862		7.85344	4.47862
43		7.84804	4.47375		7.84804	4.47375		7.84804	4.47375		7.84804	4.47375		7.84804	4.47375		7.84804	4.47375		7.84804	4.47375		7.84804	4.47375		7.84804	4.47375		7.84804	4.47375		7.84804	4.47375		7.84804	4.47375		7.84804	4.47375		7.84804	4.47375		7.84804	4.47375		7.84804	4.47375
44		7.84263	4.46888		7.84263	4.46888		7.84263	4.46888		7.84263	4.46888		7.84263	4.46888		7.84263	4.46888		7.84263	4.46888		7.84263	4.46888		7.84263	4.46888		7.84263	4.46888		7.84263	4.46888		7.84263	4.46888		7.84263	4.46888		7.84263	4.46888		7.84263	4.46888		7.84263	4.46888
45		7.83787	4.46444		7.83787	4.46444		7.83787	4.46444		7.83787	4.46444		7.83787	4.46444		7.83787	4.46444		7.83787	4.46444		7.83787	4.46444		7.83787	4.46444		7.83787	4.46444		7.83787	4.46444		7.83787	4.46444		7.83787	4.46444		7.83787	4.46444		7.83787	4.46444		7.83787	4.46444
46		7.8331	4.46		7.8331	4.46		7.8331	4.46		7.8331	4.46		7.8331	4.46		7.8331	4.46		7.8331	4.46		7.8331	4.46		7.8331	4.46		7.8331	4.46		7.8331	4.46		7.8331	4.46		7.8331	4.46		7.8331	4.46		7.8331	4.46		7.8331	4.46
47		7.82899	4.45599		7.82899	4.45599		7.82899	4.45599		7.82899	4.45599		7.82899	4.45599		7.82899	4.45599		7.82899	4.45599		7.82899	4.45599		7.82899	4.45599		7.82899	4.45599		7.82899	4.45599		7.82899	4.45599		7.82899	4.45599		7.82899	4.45599		7.82899	4.45599		7.82899	4.45599
48		7.82488	4.45198		7.82488	4.45198		7.82488	4.45198		7.82488	4.45198		7.82488	4.45198		7.82488	4.45198		7.82488	4.45198		7.82488	4.45198		7.82488	4.45198		7.82488	4.45198		7.82488	4.45198		7.82488	4.45198		7.82488	4.45198		7.82488	4.45198		7.82488	4.45198		7.82488	4.45198
49		7.82075	4.44797		7.82075	4.44797		7.82075	4.44797		7.82075	4.44797		7.82075	4.44797		7.82075	4.44797		7.82075	4.44797		7.82075	4.44797		7.82075	4.44797		7.82075	4.44797		7.82075	4.44797		7.82075	4.44797		7.82075	4.44797		7.82075	4.44797		7.82075	4.44797		7.82075	4.44797
50		7.81663	4.44395		7.81663	4.44395		7.81663	4.44395		7.81663	4.44395		7.81663	4.44395		7.81663	4.44395		7.81663	4.44395		7.81663	4.44395		7.81663	4.44395		7.81663	4.44395		7.81663	4.44395		7.81663	4.44395		7.81663	4.44395		7.81663	4.44395		7.81663	4.44395		7.81663	4.44395
51		7.81165	4.4394		7.81165	4.4394		7.81165	4.4394		7.81165	4.4394		7.81165	4.4394		7.81165	4.4394		7.81316	4.44037		7.81316	4.44037		7.81316	4.44037		7.81316	4.44037		7.81316	4.44037		7.81316	4.44037		7.81316	4.44037		7.81316	4.44037		7.81316	4.44037		7.81316	4.44037
52		7.80615	4.43452		7.80615	4.43452		7.80615	4.43452		7.80615	4.43452		7.80615	4.43452		7.80615	4.43452		7.80968	4.43679		7.80968	4.43679		7.80968	4.43679		7.80968	4.43679		7.80968	4.43679		7.80968	4.43679		7.80968	4.43679		7.80968	4.43679		7.80968	4.43679		7.80968	4.43679
53		7.79995	4.42918		7.79995	4.42918		7.79995	4.42918		7.79995	4.42918		7.79995	4.42918		7.79995	4.42918		7.8062	4.43321		7.8062	4.43321		7.8062	4.43321		7.8062	4.43321		7.8062	4.43321		7.8062	4.43321		7.8062	4.43321		7.8062	4.43321		7.8062	4.43321		7.8062	4.43321
54		7.79281	4.42324		7.79281	4.42324		7.79281	4.42324		7.79281	4.42324		7.79281	4.42324		7.79281	4.42324		7.80272	4.42963		7.80272	4.42963		7.80272	4.42963		7.80272	4.42963		7.80272	4.42963		7.80272	4.42963		7.80272	4.42963		7.80272	4.42963		7.80272	4.42963		7.80272	4.42963
55		7.78505	4.41692		7.78505	4.41692		7.78505	4.41692		7.78505	4.41692		7.78505	4.41692		7.78505	4.41692		7.79989	4.42648		7.79989	4.42648		7.79989	4.42648		7.79989	4.42648		7.79989	4.42648		7.79989	4.42648		7.79989	4.42648		7.79989	4.42648		7.79989	4.42648		7.79989	4.42648
56		7.77559	4.4095		7.77559	4.4095		7.77559	4.4095		7.77559	4.4095		7.77559	4.4095		7.77559	4.4095		7.79557	4.42237		7.79557	4.42237		7.79557	4.42237		7.79557	4.42237		7.79557	4.42237		7.79557	4.42237		7.79706	4.42333		7.79706	4.42333		7.79706	4.42333		7.79706	4.42333
57		7.76448	4.40104		7.76448	4.40104		7.76448	4.40104		7.76448	4.40104		7.76448	4.40104		7.76448	4.40104		7.79139	4.41837		7.79139	4.41837		7.79139	4.41837		7.79139	4.41837		7.79139	4.41837		7.79139	4.41837		7.79489	4.42062		7.79489	4.42062		7.79489	4.42062		7.79489	4.42062
58		7.74964	4.39016		7.74964	4.39016		7.74964	4.39016		7.74964	4.39016		7.74964	4.39016		7.74964	4.39016		7.78585	4.41348		7.78585	4.41348		7.78585	4.41348		7.78585	4.41348		7.78585	4.41348		7.78585	4.41348		7.79206	4.41747		7.79206	4.41747		7.79206	4.41747		7.79206	4.41747
59		7.73131	4.37705		7.73131	4.37705		7.73131	4.37705		7.73131	4.37705		7.73131	4.37705		7.73131	4.37705		7.78003	4.40842		7.78003	4.40842		7.78003	4.40842		7.78003	4.40842		7.78003	4.40842		7.78003	4.40842		7.78988	4.41476		7.78988	4.41476		7.78988	4.41476		7.78988	4.41476
60		7.70743	4.36035		7.70743	4.36035		7.70743	4.36035		7.70743	4.36035		7.70743	4.36035		7.70743	4.36035		7.77295	4.40255		7.77295	4.40255		7.77295	4.40255		7.77295	4.40255		7.77295	4.40255		7.77295	4.40255		7.7877	4.41204		7.7877	4.41204		7.7877	4.41204		7.7877	4.41204
61		7.79048	4.41257		7.52968	4.15057		7.30388	3.92107		7.11308	3.72407		6.95728	3.55957		6.68408	3.22657		7.76482	4.39602		7.76482	4.39602		7.76482	4.39602		7.76482	4.39602		7.76482	4.39602		7.76482	4.39602		7.78469	4.40881		7.78469	4.40881		7.78469	4.40881		7.78469	4.40881
62		7.78829	4.40986		7.52749	4.14786		7.30169	3.91836		7.11089	3.72136		6.95509	3.55686		6.68189	3.22386		7.75374	4.3876		7.75374	4.3876		7.75374	4.3876		7.75374	4.3876		7.75374	4.3876		7.75374	4.3876		7.78051	4.40481		7.78051	4.40481		7.78051	4.40481		7.78051	4.40481
63		7.78676	4.40757		7.52596	4.14557		7.30016	3.91607		7.10936	3.71907		6.95356	3.55457		6.68036	3.22157		7.74025	4.37762		7.74025	4.37762		7.74025	4.37762		7.74025	4.37762		7.74025	4.37762		7.74025	4.37762		7.77628	4.4008		7.77628	4.4008		7.77628	4.4008		7.77628	4.4008
64		7.78522	4.40529		7.52442	4.14329		7.29862	3.91379		7.10782	3.71679		6.95202	3.55229		6.67882	3.21929		7.72263	4.36499		7.72263	4.36499		7.72263	4.36499		7.72263	4.36499		7.72263	4.36499		7.72263	4.36499		7.77112	4.39619		7.77112	4.39619		7.77112	4.39619		7.77112	4.39619
65		7.78435	4.40344		7.52355	4.14144		7.29775	3.91194		7.10695	3.71494		6.95115	3.55044		6.67795	3.21744		7.70011	4.34921		7.70011	4.34921		7.70011	4.34921		7.70011	4.34921		7.70011	4.34921		7.70011	4.34921		7.76536	4.3912		7.76536	4.3912		7.76536	4.3912		7.76536	4.3912
66		7.7828	4.40116		7.522	4.13916		7.2962	3.90966		7.1054	3.71266		6.9496	3.54816		6.6764	3.21516		7.7828	4.40116		7.522	4.13916		7.2962	3.90966		7.1054	3.71266		6.9496	3.54816		6.6764	3.21516		7.75724	4.3847		7.75724	4.3847		7.75724	4.3847		7.75724	4.3847
67		7.78192	4.39931		7.52112	4.13731		7.29532	3.90781		7.10452	3.71081		6.94872	3.54631		6.67552	3.21331		7.78192	4.39931		7.52112	4.13731		7.29532	3.90781		7.10452	3.71081		6.94872	3.54631		6.67552	3.21331		7.74749	4.37715		7.74749	4.37715		7.74749	4.37715		7.74749	4.37715
68		7.78103	4.39746		7.52023	4.13546		7.29443	3.90596		7.10363	3.70896		6.94783	3.54446		6.67463	3.21146		7.78103	4.39746		7.52023	4.13546		7.29443	3.90596		7.10363	3.70896		6.94783	3.54446		6.67463	3.21146		7.73467	4.36764		7.73467	4.36764		7.73467	4.36764		7.73467	4.36764
69		7.7808	4.39605		7.52	4.13405		7.2942	3.90455		7.1034	3.70755		6.9476	3.54305		6.6744	3.21005		7.7808	4.39605		7.52	4.13405		7.2942	3.90455		7.1034	3.70755		6.9476	3.54305		6.6744	3.21005		7.71837	4.35589		7.71837	4.35589		7.71837	4.35589		7.71837	4.35589
70		7.77991	4.3942		7.51911	4.1322		7.29331	3.9027		7.10251	3.7057		6.94671	3.5412		6.67351	3.2082		7.77991	4.3942		7.51911	4.1322		7.29331	3.9027		7.10251	3.7057		6.94671	3.5412		6.67351	3.2082		7.69589	4.34016		7.69589	4.34016		7.69589	4.34016		7.69589	4.34016
71		7.77968	4.39279		7.51888	4.13079		7.29308	3.90129		7.10228	3.70429		6.94648	3.53979		6.67328	3.20679		7.77968	4.39279		7.51888	4.13079		7.29308	3.90129		7.10228	3.70429		6.94648	3.53979		6.67328	3.20679		7.77968	4.39279		7.51888	4.13079		7.29308	3.90129		7.10228	3.70429
72		7.77944	4.39137		7.51864	4.12937		7.29284	3.89987		7.10204	3.70287		6.94624	3.53837		6.67304	3.20537		7.77944	4.39137		7.51864	4.12937		7.29284	3.89987		7.10204	3.70287		6.94624	3.53837		6.67304	3.20537		7.77944	4.39137		7.51864	4.12937		7.29284	3.89987		7.10204	3.70287
73		7.77919	4.38996		7.51839	4.12796		7.29259	3.89846		7.10179	3.70146		6.94599	3.53696		6.67279	3.20396		7.77919	4.38996		7.51839	4.12796		7.29259	3.89846		7.10179	3.70146		6.94599	3.53696		6.67279	3.20396		7.77919	4.38996		7.51839	4.12796		7.29259	3.89846		7.10179	3.70146
74		7.77961	4.38898		7.51881	4.12698		7.29301	3.89748		7.10221	3.70048		6.94641	3.53598		6.67321	3.20298		7.77961	4.38898		7.51881	4.12698		7.29301	3.89748		7.10221	3.70048		6.94641	3.53598		6.67321	3.20298		7.77961	4.38898		7.51881	4.12698		7.29301	3.89748		7.10221	3.70048
75		7.77936	4.38757		7.51856	4.12557		7.29276	3.89607		7.10196	3.69907		6.94616	3.53457		6.67296	3.20157		7.77936	4.38757		7.51856	4.12557		7.29276	3.89607		7.10196	3.69907		6.94616	3.53457		6.67296	3.20157		7.77936	4.38757		7.51856	4.12557		7.29276	3.89607		7.10196	3.69907
76		7.77976	4.38658		7.51896	4.12458		7.29316	3.89508		7.10236	3.69808		6.94656	3.53358		6.67336	3.20058		7.77976	4.38658		7.51896	4.12458		7.29316	3.89508		7.10236	3.69808		6.94656	3.53358		6.67336	3.20058		7.77976	4.38658		7.51896	4.12458		7.29316	3.89508		7.10236	3.69808
77		7.78017	4.3856		7.51937	4.1236		7.29357	3.8941		7.10277	3.6971		6.94697	3.5326		6.67377	3.1996		7.78017	4.3856		7.51937	4.1236		7.29357	3.8941		7.10277	3.6971		6.94697	3.5326		6.67377	3.1996		7.78017	4.3856		7.51937	4.1236		7.29357	3.8941		7.10277	3.6971
78		7.78122	4.38505		7.52042	4.12305		7.29462	3.89355		7.10382	3.69655		6.94802	3.53205		6.67482	3.19905		7.78122	4.38505		7.52042	4.12305		7.29462	3.89355		7.10382	3.69655		6.94802	3.53205		6.67482	3.19905		7.78122	4.38505		7.52042	4.12305		7.29462	3.89355		7.10382	3.69655
79		7.78162	4.38407		7.52082	4.12207		7.29502	3.89257		7.10422	3.69557		6.94842	3.53107		6.67522	3.19807		7.78162	4.38407		7.52082	4.12207		7.29502	3.89257		7.10422	3.69557		6.94842	3.53107		6.67522	3.19807		7.78162	4.38407		7.52082	4.12207		7.29502	3.89257		7.10422	3.69557
80		7.78267	4.38352		7.52187	4.12152		7.29607	3.89202		7.10527	3.69502		6.94947	3.53052		6.67627	3.19752		7.78267	4.38352		7.52187	4.12152		7.29607	3.89202		7.10527	3.69502		6.94947	3.53052		6.67627	3.19752		7.78267	4.38352		7.52187	4.12152		7.29607	3.89202		7.10527	3.69502
81		7.79993	4.38924		7.53913	4.12724		7.31333	3.89774		7.12253	3.70074		6.96673	3.53624		6.69353	3.20324		7.79993	4.38924		7.53913	4.12724		7.31333	3.89774		7.12253	3.70074		6.96673	3.53624		6.69353	3.20324		7.79993	4.38924		7.53913	4.12724		7.31333	3.89774		7.12253	3.70074
82		7.80099	4.38871		7.54019	4.12671		7.31439	3.89721		7.12359	3.70021		6.96779	3.53571		6.69459	3.20271		7.80099	4.38871		7.54019	4.12671		7.31439	3.89721		7.12359	3.70021		6.96779	3.53571		6.69459	3.20271		7.80099	4.38871		7.54019	4.12671		7.31439	3.89721		7.12359	3.70021
83		7.80205	4.38817		7.54125	4.12617		7.31545	3.89667		7.12465	3.69967		6.96885	3.53517		6.69565	3.20217		7.80205	4.38817		7.54125	4.12617		7.31545	3.89667		7.12465	3.69967		6.96885	3.53517		6.69565	3.20217		7.80205	4.38817		7.54125	4.12617		7.31545	3.89667		7.12465	3.69967
84		7.8031	4.38764		7.5423	4.12564		7.3165	3.89614		7.1257	3.69914		6.9699	3.53464		6.6967	3.20164		7.8031	4.38764		7.5423	4.12564		7.3165	3.89614		7.1257	3.69914		6.9699	3.53464		6.6967	3.20164		7.8031	4.38764		7.5423	4.12564		7.3165	3.89614		7.1257	3.69914
85		7.8048	4.38753		7.544	4.12553		7.3182	3.89603		7.1274	3.69903		6.9716	3.53453		6.6984	3.20153		7.8048	4.38753		7.544	4.12553		7.3182	3.89603		7.1274	3.69903		6.9716	3.53453		6.6984	3.20153		7.8048	4.38753		7.544	4.12553		7.3182	3.89603		7.1274	3.69903
86		7.80649	4.38742		7.54569	4.12542		7.31989	3.89592		7.12909	3.69892		6.97329	3.53442		6.70009	3.20142		7.80649	4.38742		7.54569	4.12542		7.31989	3.89592		7.12909	3.69892		6.97329	3.53442		6.70009	3.20142		7.80649	4.38742		7.54569	4.12542		7.31989	3.89592		7.12909	3.69892
87		7.80818	4.38731		7.54738	4.12531		7.32158	3.89581		7.13078	3.69881		6.97498	3.53431		6.70178	3.20131		7.80818	4.38731		7.54738	4.12531		7.32158	3.89581		7.13078	3.69881		6.97498	3.53431		6.70178	3.20131		7.80818	4.38731		7.54738	4.12531		7.32158	3.89581		7.13078	3.69881
88		7.80987	4.3872		7.54907	4.1252		7.32327	3.8957		7.13247	3.6987		6.97667	3.5342		6.70347	3.2012		7.80987	4.3872		7.54907	4.1252		7.32327	3.8957		7.13247	3.6987		6.97667	3.5342		6.70347	3.2012		7.80987	4.3872		7.54907	4.1252		7.32327	3.8957		7.13247	3.6987
89		7.81155	4.38709		7.55075	4.12509		7.32495	3.89559		7.13415	3.69859		6.97835	3.53409		6.70515	3.20109		7.81155	4.38709		7.55075	4.12509		7.32495	3.89559		7.13415	3.69859		6.97835	3.53409		6.70515	3.20109		7.81155	4.38709		7.55075	4.12509		7.32495	3.89559		7.13415	3.69859
90		7.81322	4.38698		7.55242	4.12498		7.32662	3.89548		7.13582	3.69848		6.98002	3.53398		6.70682	3.20098		7.81322	4.38698		7.55242	4.12498		7.32662	3.89548		7.13582	3.69848		6.98002	3.53398		6.70682	3.20098		7.81322	4.38698		7.55242	4.12498		7.32662	3.89548		7.13582	3.69848
91		7.81554	4.3873		7.55474	4.1253		7.32894	3.8958		7.13814	3.6988		6.98234	3.5343		6.70914	3.2013		7.81554	4.3873		7.55474	4.1253		7.32894	3.8958		7.13814	3.6988		6.98234	3.5343		6.70914	3.2013		7.81554	4.3873		7.55474	4.1253		7.32894	3.8958		7.13814	3.6988
92		7.81721	4.38718		7.55641	4.12518		7.33061	3.89568		7.13981	3.69868		6.98401	3.53418		6.71081	3.20118		7.81721	4.38718		7.55641	4.12518		7.33061	3.89568		7.13981	3.69868		6.98401	3.53418		6.71081	3.20118		7.81721	4.38718		7.55641	4.12518		7.33061	3.89568		7.13981	3.69868
93		7.81952	4.3875		7.55872	4.1255		7.33292	3.896		7.14212	3.699		6.98632	3.5345		6.71312	3.2015		7.81952	4.3875		7.55872	4.1255		7.33292	3.896		7.14212	3.699		6.98632	3.5345		6.71312	3.2015		7.81952	4.3875		7.55872	4.1255		7.33292	3.896		7.14212	3.699
94		7.82182	4.38781		7.56102	4.12581		7.33522	3.89631		7.14442	3.69931		6.98862	3.53481		6.71542	3.20181		7.82182	4.38781		7.56102	4.12581		7.33522	3.89631		7.14442	3.69931		6.98862	3.53481		6.71542	3.20181		7.82182	4.38781		7.56102	4.12581		7.33522	3.89631		7.14442	3.69931
95		7.82412	4.38812		7.56332	4.12612		7.33752	3.89662		7.14672	3.69962		6.99092	3.53512		6.71772	3.20212		7.82412	4.38812		7.56332	4.12612		7.33752	3.89662		7.14672	3.69962		6.99092	3.53512		6.71772	3.20212		7.82412	4.38812		7.56332	4.12612		7.33752	3.89662		7.14672	3.69962
96		7.82706	4.38885		7.56626	4.12685		7.34046	3.89735		7.14966	3.70035		6.99386	3.53585		6.72066	3.20285		7.82706	4.38885		7.56626	4.12685		7.34046	3.89735		7.14966	3.70035		6.99386	3.53585		6.72066	3.20285		7.82706	4.38885		7.56626	4.12685		7.34046	3.89735		7.14966	3.70035
97		7.82935	4.38916		7.56855	4.12716		7.34275	3.89766		7.15195	3.70066		6.99615	3.53616		6.72295	3.20316		7.82935	4.38916		7.56855	4.12716		7.34275	3.89766		7.15195	3.70066		6.99615	3.53616		6.72295	3.20316		7.82935	4.38916		7.56855	4.12716		7.34275	3.89766		7.15195	3.70066
98		7.83228	4.38989		7.57148	4.12789		7.34568	3.89839		7.15488	3.70139		6.99908	3.53689		6.72588	3.20389		7.83228	4.38989		7.57148	4.12789		7.34568	3.89839		7.15488	3.70139		6.99908	3.53689		6.72588	3.20389		7.83228	4.38989		7.57148	4.12789		7.34568	3.89839		7.15488	3.70139
99		7.83456	4.3902		7.57376	4.1282		7.34796	3.8987		7.15716	3.7017		7.00136	3.5372		6.72816	3.2042		7.83456	4.3902		7.57376	4.1282		7.34796	3.8987		7.15716	3.7017		7.00136	3.5372		6.72816	3.2042		7.83456	4.3902		7.57376	4.1282		7.34796	3.8987		7.15716	3.7017
100		7.83748	4.39093		7.57668	4.12893		7.35088	3.89943		7.16008	3.70243		7.00428	3.53793		6.73108	3.20493		7.83748	4.39093		7.57668	4.12893		7.35088	3.89943		7.16008	3.70243		7.00428	3.53793		6.73108	3.20493		7.83748	4.39093		7.57668	4.12893		7.35088	3.89943		7.16008	3.70243
101		7.84039	4.39166		7.57959	4.12966		7.35379	3.90016		7.16299	3.70316		7.00719	3.53866		6.73399	3.20566		7.84039	4.39166		7.57959	4.12966		7.35379	3.90016		7.16299	3.70316		7.00719	3.53866		6.73399	3.20566		7.84039	4.39166		7.57959	4.12966		7.35379	3.90016		7.16299	3.70316
102		7.8433	4.39238		7.5825	4.13038		7.3567	3.90088		7.1659	3.70388		7.0101	3.53938		6.7369	3.20638		7.8433	4.39238		7.5825	4.13038		7.3567	3.90088		7.1659	3.70388		7.0101	3.53938		6.7369	3.20638		7.8433	4.39238		7.5825	4.13038		7.3567	3.90088		7.1659	3.70388
103		7.8462	4.39311		7.5854	4.13111		7.3596	3.90161		7.1688	3.70461		7.013	3.54011		6.7398	3.20711		7.8462	4.39311		7.5854	4.13111		7.3596	3.90161		7.1688	3.70461		7.013	3.54011		6.7398	3.20711		7.8462	4.39311		7.5854	4.13111		7.3596	3.90161		7.1688	3.70461
104		7.84909	4.39383		7.58829	4.13183		7.36249	3.90233		7.17169	3.70533		7.01589	3.54083		6.74269	3.20783		7.84909	4.39383		7.58829	4.13183		7.36249	3.90233		7.17169	3.70533		7.01589	3.54083		6.74269	3.20783		7.84909	4.39383		7.58829	4.13183		7.36249	3.90233		7.17169	3.70533
105		7.85198	4.39455		7.59118	4.13255		7.36538	3.90305		7.17458	3.70605		7.01878	3.54155		6.74558	3.20855		7.85198	4.39455		7.59118	4.13255		7.36538	3.90305		7.17458	3.70605		7.01878	3.54155		6.74558	3.20855		7.85198	4.39455		7.59118	4.13255		7.36538	3.90305		7.17458	3.70605
106		7.85551	4.3957		7.59471	4.1337		7.36891	3.9042		7.17811	3.7072		7.02231	3.5427		6.74911	3.2097		7.85551	4.3957		7.59471	4.1337		7.36891	3.9042		7.17811	3.7072		7.02231	3.5427		6.74911	3.2097		7.85551	4.3957		7.59471	4.1337		7.36891	3.9042		7.17811	3.7072
107		7.85839	4.39642		7.59759	4.13442		7.37179	3.90492		7.18099	3.70792		7.02519	3.54342		6.75199	3.21042		7.85839	4.39642		7.59759	4.13442		7.37179	3.90492		7.18099	3.70792		7.02519	3.54342		6.75199	3.21042		7.85839	4.39642		7.59759	4.13442		7.37179	3.90492		7.18099	3.70792
108		7.86191	4.39756		7.60111	4.13556		7.37531	3.90606		7.18451	3.70906		7.02871	3.54456		6.75551	3.21156		7.86191	4.39756		7.60111	4.13556		7.37531	3.90606		7.18451	3.70906		7.02871	3.54456		6.75551	3.21156		7.86191	4.39756		7.60111	4.13556		7.37531	3.90606		7.18451	3.70906
109		7.86478	4.39828		7.60398	4.13628		7.37818	3.90678		7.18738	3.70978		7.03158	3.54528		6.75838	3.21228		7.86478	4.39828		7.60398	4.13628		7.37818	3.90678		7.18738	3.70978		7.03158	3.54528		6.75838	3.21228		7.86478	4.39828		7.60398	4.13628		7.37818	3.90678		7.18738	3.70978
110		7.86828	4.39942		7.60748	4.13742		7.38168	3.90792		7.19088	3.71092		7.03508	3.54642		6.76188	3.21342		7.86828	4.39942		7.60748	4.13742		7.38168	3.90792		7.19088	3.71092		7.03508	3.54642		6.76188	3.21342		7.86828	4.39942		7.60748	4.13742		7.38168	3.90792		7.19088	3.71092
111		7.87178	4.40056		7.61098	4.13856		7.38518	3.90906		7.19438	3.71206		7.03858	3.54756		6.76538	3.21456		7.87178	4.40056		7.61098	4.13856		7.38518	3.90906		7.19438	3.71206		7.03858	3.54756		6.76538	3.21456		7.87178	4.40056		7.61098	4.13856		7.38518	3.90906		7.19438	3.71206
112		7.87528	4.4017		7.61448	4.1397		7.38868	3.9102		7.19788	3.7132		7.04208	3.5487		6.76888	3.2157		7.87528	4.4017		7.61448	4.1397		7.38868	3.9102		7.19788	3.7132		7.04208	3.5487		6.76888	3.2157		7.87528	4.4017		7.61448	4.1397		7.38868	3.9102		7.19788	3.7132
113		7.87876	4.40283		7.61796	4.14083		7.39216	3.91133		7.20136	3.71433		7.04556	3.54983		6.77236	3.21683		7.87876	4.40283		7.61796	4.14083		7.39216	3.91133		7.20136	3.71433		7.04556	3.54983		6.77236	3.21683		7.87876	4.40283		7.61796	4.14083		7.39216	3.91133		7.20136	3.71433
114		7.88225	4.40396		7.62145	4.14196		7.39565	3.91246		7.20485	3.71546		7.04905	3.55096		6.77585	3.21796		7.88225	4.40396		7.62145	4.14196		7.39565	3.91246		7.20485	3.71546		7.04905	3.55096		6.77585	3.21796		7.88225	4.40396		7.62145	4.14196		7.39565	3.91246		7.20485	3.71546
115		7.88572	4.4051		7.62492	4.1431		7.39912	3.9136		7.20832	3.7166		7.05252	3.5521		6.77932	3.2191		7.88572	4.4051		7.62492	4.1431		7.39912	3.9136		7.20832	3.7166		7.05252	3.5521		6.77932	3.2191		7.88572	4.4051		7.62492	4.1431		7.39912	3.9136		7.20832	3.7166
116		7.88919	4.40623		7.62839	4.14423		7.40259	3.91473		7.21179	3.71773		7.05599	3.55323		6.78279	3.22023		7.88919	4.40623		7.62839	4.14423		7.40259	3.91473		7.21179	3.71773		7.05599	3.55323		6.78279	3.22023		7.88919	4.40623		7.62839	4.14423		7.40259	3.91473		7.21179	3.71773
117		7.89266	4.40736		7.63186	4.14536		7.40606	3.91586		7.21526	3.71886		7.05946	3.55436		6.78626	3.22136		7.89266	4.40736		7.63186	4.14536		7.40606	3.91586		7.21526	3.71886		7.05946	3.55436		6.78626	3.22136		7.89266	4.40736		7.63186	4.14536		7.40606	3.91586		7.21526	3.71886
118		7.89612	4.40848		7.63532	4.14648		7.40952	3.91698		7.21872	3.71998		7.06292	3.55548		6.78972	3.22248		7.89612	4.40848		7.63532	4.14648		7.40952	3.91698		7.21872	3.71998		7.06292	3.55548		6.78972	3.22248		7.89612	4.40848		7.63532	4.14648		7.40952	3.91698		7.21872	3.71998
119		7.90021	4.41003		7.63941	4.14803		7.41361	3.91853		7.22281	3.72153		7.06701	3.55703		6.79381	3.22403		7.90021	4.41003		7.63941	4.14803		7.41361	3.91853		7.22281	3.72153		7.06701	3.55703		6.79381	3.22403		7.90021	4.41003		7.63941	4.14803		7.41361	3.91853		7.22281	3.72153
120		7.90366	4.41116		7.64286	4.14916		7.41706	3.91966		7.22626	3.72266		7.07046	3.55816		6.79726	3.22516		7.90366	4.41116		7.64286	4.14916		7.41706	3.91966		7.22626	3.72266		7.07046	3.55816		6.79726	3.22516		7.90366	4.41116		7.64286	4.14916		7.41706	3.91966		7.22626	3.72266
BSZH		LAB at 40 km																		LAB at 45 km																		LAB at 50 km
		no melt			melt 0.5%			melt 1%			melt 1.5%			melt 2%			melt 4%			no melt			melt 0.5%			melt 1%			melt 1.5%			melt 2%			melt 4%			no melt			melt 0.5%			melt 1%			melt 1.5%
Depth		Vp	Vs		Vp	Vs		Vp	Vs		Vp	Vs		Vp	Vs		Vp	Vs		Vp	Vs		Vp	Vs		Vp	Vs		Vp	Vs		Vp	Vs		Vp	Vs		Vp	Vs		Vp	Vs		Vp	Vs		Vp	Vs
1		1.75	0.98		1.75	0.98		1.75	0.98		1.75	0.98		1.75	0.98		1.75	0.98		1.75	0.98		1.75	0.98		1.75	0.98		1.75	0.98		1.75	0.98		1.75	0.98		1.75	0.98		1.75	0.98		1.75	0.98		1.75	0.98
2		2.85	1.59333		2.85	1.59333		2.85	1.59333		2.85	1.59333		2.85	1.59333		2.85	1.59333		2.85	1.59333		2.85	1.59333		2.85	1.59333		2.85	1.59333		2.85	1.59333		2.85	1.59333		2.85	1.59333		2.85	1.59333		2.85	1.59333		2.85	1.59333
3		3.95	2.20667		3.95	2.20667		3.95	2.20667		3.95	2.20667		3.95	2.20667		3.95	2.20667		3.95	2.20667		3.95	2.20667		3.95	2.20667		3.95	2.20667		3.95	2.20667		3.95	2.20667		3.95	2.20667		3.95	2.20667		3.95	2.20667		3.95	2.20667
4		5.05	2.82		5.05	2.82		5.05	2.82		5.05	2.82		5.05	2.82		5.05	2.82		5.05	2.82		5.05	2.82		5.05	2.82		5.05	2.82		5.05	2.82		5.05	2.82		5.05	2.82		5.05	2.82		5.05	2.82		5.05	2.82
5		5.51687	3.20208		5.51687	3.20208		5.51687	3.20208		5.51687	3.20208		5.51687	3.20208		5.51687	3.20208		5.51687	3.20208		5.51687	3.20208		5.51687	3.20208		5.51687	3.20208		5.51687	3.20208		5.51687	3.20208		5.51687	3.20208		5.51687	3.20208		5.51687	3.20208		5.51687	3.20208
6		5.98374	3.58415		5.98374	3.58415		5.98374	3.58415		5.98374	3.58415		5.98374	3.58415		5.98374	3.58415		5.98374	3.58415		5.98374	3.58415		5.98374	3.58415		5.98374	3.58415		5.98374	3.58415		5.98374	3.58415		5.98374	3.58415		5.98374	3.58415		5.98374	3.58415		5.98374	3.58415
7		5.99906	3.58871		5.99906	3.58871		5.99906	3.58871		5.99906	3.58871		5.99906	3.58871		5.99906	3.58871		5.99906	3.58871		5.99906	3.58871		5.99906	3.58871		5.99906	3.58871		5.99906	3.58871		5.99906	3.58871		5.99906	3.58871		5.99906	3.58871		5.99906	3.58871		5.99906	3.58871
8		6.01438	3.59327		6.01438	3.59327		6.01438	3.59327		6.01438	3.59327		6.01438	3.59327		6.01438	3.59327		6.01438	3.59327		6.01438	3.59327		6.01438	3.59327		6.01438	3.59327		6.01438	3.59327		6.01438	3.59327		6.01438	3.59327		6.01438	3.59327		6.01438	3.59327		6.01438	3.59327
9		6.04954	3.60446		6.04954	3.60446		6.04954	3.60446		6.04954	3.60446		6.04954	3.60446		6.04954	3.60446		6.04954	3.60446		6.04954	3.60446		6.04954	3.60446		6.04954	3.60446		6.04954	3.60446		6.04954	3.60446		6.04954	3.60446		6.04954	3.60446		6.04954	3.60446		6.04954	3.60446
10		6.08471	3.61565		6.08471	3.61565		6.08471	3.61565		6.08471	3.61565		6.08471	3.61565		6.08471	3.61565		6.08471	3.61565		6.08471	3.61565		6.08471	3.61565		6.08471	3.61565		6.08471	3.61565		6.08471	3.61565		6.08471	3.61565		6.08471	3.61565		6.08471	3.61565		6.08471	3.61565
11		6.16414	3.63732		6.16414	3.63732		6.16414	3.63732		6.16414	3.63732		6.16414	3.63732		6.16414	3.63732		6.16414	3.63732		6.16414	3.63732		6.16414	3.63732		6.16414	3.63732		6.16414	3.63732		6.16414	3.63732		6.16414	3.63732		6.16414	3.63732		6.16414	3.63732		6.16414	3.63732
12		6.24358	3.65899		6.24358	3.65899		6.24358	3.65899		6.24358	3.65899		6.24358	3.65899		6.24358	3.65899		6.24358	3.65899		6.24358	3.65899		6.24358	3.65899		6.24358	3.65899		6.24358	3.65899		6.24358	3.65899		6.24358	3.65899		6.24358	3.65899		6.24358	3.65899		6.24358	3.65899
13		6.32301	3.68066		6.32301	3.68066		6.32301	3.68066		6.32301	3.68066		6.32301	3.68066		6.32301	3.68066		6.32301	3.68066		6.32301	3.68066		6.32301	3.68066		6.32301	3.68066		6.32301	3.68066		6.32301	3.68066		6.32301	3.68066		6.32301	3.68066		6.32301	3.68066		6.32301	3.68066
14		6.45373	3.7145		6.45373	3.7145		6.45373	3.7145		6.45373	3.7145		6.45373	3.7145		6.45373	3.7145		6.45373	3.7145		6.45373	3.7145		6.45373	3.7145		6.45373	3.7145		6.45373	3.7145		6.45373	3.7145		6.45373	3.7145		6.45373	3.7145		6.45373	3.7145		6.45373	3.7145
15		6.58444	3.74834		6.58444	3.74834		6.58444	3.74834		6.58444	3.74834		6.58444	3.74834		6.58444	3.74834		6.58444	3.74834		6.58444	3.74834		6.58444	3.74834		6.58444	3.74834		6.58444	3.74834		6.58444	3.74834		6.58444	3.74834		6.58444	3.74834		6.58444	3.74834		6.58444	3.74834
16		6.71515	3.78217		6.71515	3.78217		6.71515	3.78217		6.71515	3.78217		6.71515	3.78217		6.71515	3.78217		6.71515	3.78217		6.71515	3.78217		6.71515	3.78217		6.71515	3.78217		6.71515	3.78217		6.71515	3.78217		6.71515	3.78217		6.71515	3.78217		6.71515	3.78217		6.71515	3.78217
17		6.84711	3.8442		6.84711	3.8442		6.84711	3.8442		6.84711	3.8442		6.84711	3.8442		6.84711	3.8442		6.84711	3.8442		6.84711	3.8442		6.84711	3.8442		6.84711	3.8442		6.84711	3.8442		6.84711	3.8442		6.84711	3.8442		6.84711	3.8442		6.84711	3.8442		6.84711	3.8442
18		6.97907	3.90623		6.97907	3.90623		6.97907	3.90623		6.97907	3.90623		6.97907	3.90623		6.97907	3.90623		6.97907	3.90623		6.97907	3.90623		6.97907	3.90623		6.97907	3.90623		6.97907	3.90623		6.97907	3.90623		6.97907	3.90623		6.97907	3.90623		6.97907	3.90623		6.97907	3.90623
19		7.11103	3.96826		7.11103	3.96826		7.11103	3.96826		7.11103	3.96826		7.11103	3.96826		7.11103	3.96826		7.11103	3.96826		7.11103	3.96826		7.11103	3.96826		7.11103	3.96826		7.11103	3.96826		7.11103	3.96826		7.11103	3.96826		7.11103	3.96826		7.11103	3.96826		7.11103	3.96826
20		7.24299	4.03028		7.24299	4.03028		7.24299	4.03028		7.24299	4.03028		7.24299	4.03028		7.24299	4.03028		7.24299	4.03028		7.24299	4.03028		7.24299	4.03028		7.24299	4.03028		7.24299	4.03028		7.24299	4.03028		7.24299	4.03028		7.24299	4.03028		7.24299	4.03028		7.24299	4.03028
21		7.35177	4.09603		7.35177	4.09603		7.35177	4.09603		7.35177	4.09603		7.35177	4.09603		7.35177	4.09603		7.35177	4.09603		7.35177	4.09603		7.35177	4.09603		7.35177	4.09603		7.35177	4.09603		7.35177	4.09603		7.35177	4.09603		7.35177	4.09603		7.35177	4.09603		7.35177	4.09603
22		7.46055	4.16178		7.46055	4.16178		7.46055	4.16178		7.46055	4.16178		7.46055	4.16178		7.46055	4.16178		7.46055	4.16178		7.46055	4.16178		7.46055	4.16178		7.46055	4.16178		7.46055	4.16178		7.46055	4.16178		7.46055	4.16178		7.46055	4.16178		7.46055	4.16178		7.46055	4.16178
23		7.56933	4.22752		7.56933	4.22752		7.56933	4.22752		7.56933	4.22752		7.56933	4.22752		7.56933	4.22752		7.56933	4.22752		7.56933	4.22752		7.56933	4.22752		7.56933	4.22752		7.56933	4.22752		7.56933	4.22752		7.56933	4.22752		7.56933	4.22752		7.56933	4.22752		7.56933	4.22752
24		7.98167	4.58724		7.98167	4.58724		7.98167	4.58724		7.98167	4.58724		7.98167	4.58724		7.98167	4.58724		7.98167	4.58724		7.98167	4.58724		7.98167	4.58724		7.98167	4.58724		7.98167	4.58724		7.98167	4.58724		7.98167	4.58724		7.98167	4.58724		7.98167	4.58724		7.98167	4.58724
25		7.9728	4.58001		7.9728	4.58001		7.9728	4.58001		7.9728	4.58001		7.9728	4.58001		7.9728	4.58001		7.9728	4.58001		7.9728	4.58001		7.9728	4.58001		7.9728	4.58001		7.9728	4.58001		7.9728	4.58001		7.9728	4.58001		7.9728	4.58001		7.9728	4.58001		7.9728	4.58001
26		7.96451	4.57318		7.96451	4.57318		7.96451	4.57318		7.96451	4.57318		7.96451	4.57318		7.96451	4.57318		7.96451	4.57318		7.96451	4.57318		7.96451	4.57318		7.96451	4.57318		7.96451	4.57318		7.96451	4.57318		7.96451	4.57318		7.96451	4.57318		7.96451	4.57318		7.96451	4.57318
27		7.95618	4.56632		7.95618	4.56632		7.95618	4.56632		7.95618	4.56632		7.95618	4.56632		7.95618	4.56632		7.95618	4.56632		7.95618	4.56632		7.95618	4.56632		7.95618	4.56632		7.95618	4.56632		7.95618	4.56632		7.95618	4.56632		7.95618	4.56632		7.95618	4.56632		7.95618	4.56632
28		7.94782	4.55945		7.94782	4.55945		7.94782	4.55945		7.94782	4.55945		7.94782	4.55945		7.94782	4.55945		7.94782	4.55945		7.94782	4.55945		7.94782	4.55945		7.94782	4.55945		7.94782	4.55945		7.94782	4.55945		7.94782	4.55945		7.94782	4.55945		7.94782	4.55945		7.94782	4.55945
29		7.93941	4.55255		7.93941	4.55255		7.93941	4.55255		7.93941	4.55255		7.93941	4.55255		7.93941	4.55255		7.93941	4.55255		7.93941	4.55255		7.93941	4.55255		7.93941	4.55255		7.93941	4.55255		7.93941	4.55255		7.93941	4.55255		7.93941	4.55255		7.93941	4.55255		7.93941	4.55255
30		7.93162	4.54607		7.93162	4.54607		7.93162	4.54607		7.93162	4.54607		7.93162	4.54607		7.93162	4.54607		7.93162	4.54607		7.93162	4.54607		7.93162	4.54607		7.93162	4.54607		7.93162	4.54607		7.93162	4.54607		7.93162	4.54607		7.93162	4.54607		7.93162	4.54607		7.93162	4.54607
31		7.92222	4.53854		7.92222	4.53854		7.92222	4.53854		7.92222	4.53854		7.92222	4.53854		7.92222	4.53854		7.9238	4.53957		7.9238	4.53957		7.9238	4.53957		7.9238	4.53957		7.9238	4.53957		7.9238	4.53957		7.9238	4.53957		7.9238	4.53957		7.9238	4.53957		7.9238	4.53957
32		7.91289	4.53108		7.91289	4.53108		7.91289	4.53108		7.91289	4.53108		7.91289	4.53108		7.91289	4.53108		7.91661	4.53348		7.91661	4.53348		7.91661	4.53348		7.91661	4.53348		7.91661	4.53348		7.91661	4.53348		7.91661	4.53348		7.91661	4.53348		7.91661	4.53348		7.91661	4.53348
33		7.90282	4.52314		7.90282	4.52314		7.90282	4.52314		7.90282	4.52314		7.90282	4.52314		7.90282	4.52314		7.90938	4.52739		7.90938	4.52739		7.90938	4.52739		7.90938	4.52739		7.90938	4.52739		7.90938	4.52739		7.90938	4.52739		7.90938	4.52739		7.90938	4.52739		7.90938	4.52739
34		7.89174	4.51456		7.89174	4.51456		7.89174	4.51456		7.89174	4.51456		7.89174	4.51456		7.89174	4.51456		7.90214	4.52128		7.90214	4.52128		7.90214	4.52128		7.90214	4.52128		7.90214	4.52128		7.90214	4.52128		7.90214	4.52128		7.90214	4.52128		7.90214	4.52128		7.90214	4.52128
35		7.87999	4.50554		7.87999	4.50554		7.87999	4.50554		7.87999	4.50554		7.87999	4.50554		7.87999	4.50554		7.89553	4.51559		7.89553	4.51559		7.89553	4.51559		7.89553	4.51559		7.89553	4.51559		7.89553	4.51559		7.89553	4.51559		7.89553	4.51559		7.89553	4.51559		7.89553	4.51559
36		7.86645	4.49538		7.86645	4.49538		7.86645	4.49538		7.86645	4.49538		7.86645	4.49538		7.86645	4.49538		7.88734	4.50889		7.88734	4.50889		7.88734	4.50889		7.88734	4.50889		7.88734	4.50889		7.88734	4.50889		7.8889	4.5099		7.8889	4.5099		7.8889	4.5099		7.8889	4.5099
37		7.85053	4.48369		7.85053	4.48369		7.85053	4.48369		7.85053	4.48369		7.85053	4.48369		7.85053	4.48369		7.87861	4.50183		7.87861	4.50183		7.87861	4.50183		7.87861	4.50183		7.87861	4.50183		7.87861	4.50183		7.88226	4.50419		7.88226	4.50419		7.88226	4.50419		7.88226	4.50419
38		7.83207	4.47036		7.83207	4.47036		7.83207	4.47036		7.83207	4.47036		7.83207	4.47036		7.83207	4.47036		7.86979	4.49474		7.86979	4.49474		7.86979	4.49474		7.86979	4.49474		7.86979	4.49474		7.86979	4.49474		7.87626	4.49892		7.87626	4.49892		7.87626	4.49892		7.87626	4.49892
39		7.80934	4.45427		7.80934	4.45427		7.80934	4.45427		7.80934	4.45427		7.80934	4.45427		7.80934	4.45427		7.86	4.48702		7.86	4.48702		7.86	4.48702		7.86	4.48702		7.86	4.48702		7.86	4.48702		7.87024	4.49363		7.87024	4.49363		7.87024	4.49363		7.87024	4.49363
40		7.7809	4.43449		7.7809	4.43449		7.7809	4.43449		7.7809	4.43449		7.7809	4.43449		7.7809	4.43449		7.8489	4.47845		7.8489	4.47845		7.8489	4.47845		7.8489	4.47845		7.8489	4.47845		7.8489	4.47845		7.86421	4.48834		7.86421	4.48834		7.86421	4.48834		7.86421	4.48834
41		7.8633	4.48641		7.6025	4.22441		7.3767	3.99491		7.1859	3.79791		7.0301	3.63341		6.7569	3.30041		7.8367	4.46919		7.8367	4.46919		7.8367	4.46919		7.8367	4.46919		7.8367	4.46919		7.8367	4.46919		7.85729	4.48249		7.85729	4.48249		7.85729	4.48249		7.85729	4.48249
42		7.8579	4.48154		7.5971	4.21954		7.3713	3.99004		7.1805	3.79304		7.0247	3.62854		6.7515	3.29554		7.82214	4.45841		7.82214	4.45841		7.82214	4.45841		7.82214	4.45841		7.82214	4.45841		7.82214	4.45841		7.84983	4.47629		7.84983	4.47629		7.84983	4.47629		7.84983	4.47629
43		7.85248	4.47666		7.59168	4.21466		7.36588	3.98516		7.17508	3.78816		7.01928	3.62366		6.74608	3.29066		7.80444	4.4456		7.80444	4.4456		7.80444	4.4456		7.80444	4.4456		7.80444	4.4456		7.80444	4.4456		7.84166	4.46964		7.84166	4.46964		7.84166	4.46964		7.84166	4.46964
44		7.84706	4.47178		7.58626	4.20978		7.36046	3.98028		7.16966	3.78328		7.01386	3.61878		6.74066	3.28578		7.78252	4.43007		7.78252	4.43007		7.78252	4.43007		7.78252	4.43007		7.78252	4.43007		7.78252	4.43007		7.83252	4.46236		7.83252	4.46236		7.83252	4.46236		7.83252	4.46236
45		7.84229	4.46734		7.58149	4.20534		7.35569	3.97584		7.16489	3.77884		7.00909	3.61434		6.73589	3.28134		7.7556	4.41131		7.7556	4.41131		7.7556	4.41131		7.7556	4.41131		7.7556	4.41131		7.7556	4.41131		7.82275	4.45468		7.82275	4.45468		7.82275	4.45468		7.82275	4.45468
46		7.83752	4.46289		7.57672	4.20089		7.35092	3.97139		7.16012	3.77439		7.00432	3.60989		6.73112	3.27689		7.83752	4.46289		7.57672	4.20089		7.35092	3.97139		7.16012	3.77439		7.00432	3.60989		6.73112	3.27689		7.81124	4.44589		7.81124	4.44589		7.81124	4.44589		7.81124	4.44589
47		7.8334	4.45887		7.5726	4.19687		7.3468	3.96737		7.156	3.77037		7.0002	3.60587		6.727	3.27287		7.8334	4.45887		7.5726	4.19687		7.3468	3.96737		7.156	3.77037		7.0002	3.60587		6.727	3.27287		7.79806	4.43604		7.79806	4.43604		7.79806	4.43604		7.79806	4.43604
48		7.82927	4.45485		7.56847	4.19285		7.34267	3.96335		7.15187	3.76635		6.99607	3.60185		6.72287	3.26885		7.82927	4.45485		7.56847	4.19285		7.34267	3.96335		7.15187	3.76635		6.99607	3.60185		6.72287	3.26885		7.78176	4.42417		7.78176	4.42417		7.78176	4.42417		7.78176	4.42417
49		7.82514	4.45083		7.56434	4.18883		7.33854	3.95933		7.14774	3.76233		6.99194	3.59783		6.71874	3.26483		7.82514	4.45083		7.56434	4.18883		7.33854	3.95933		7.14774	3.76233		6.99194	3.59783		6.71874	3.26483		7.76128	4.4096		7.76128	4.4096		7.76128	4.4096		7.76128	4.4096
50		7.821	4.44681		7.5602	4.18481		7.3344	3.95531		7.1436	3.75831		6.9878	3.59381		6.7146	3.26081		7.821	4.44681		7.5602	4.18481		7.3344	3.95531		7.1436	3.75831		6.9878	3.59381		6.7146	3.26081		7.7352	4.39142		7.7352	4.39142		7.7352	4.39142		7.7352	4.39142
51		7.81753	4.44323		7.55673	4.18123		7.33093	3.95173		7.14013	3.75473		6.98433	3.59023		6.71113	3.25723		7.81753	4.44323		7.55673	4.18123		7.33093	3.95173		7.14013	3.75473		6.98433	3.59023		6.71113	3.25723		7.81753	4.44323		7.55673	4.18123		7.33093	3.95173		7.14013	3.75473
52		7.81404	4.43964		7.55324	4.17764		7.32744	3.94814		7.13664	3.75114		6.98084	3.58664		6.70764	3.25364		7.81404	4.43964		7.55324	4.17764		7.32744	3.94814		7.13664	3.75114		6.98084	3.58664		6.70764	3.25364		7.81404	4.43964		7.55324	4.17764		7.32744	3.94814		7.13664	3.75114
53		7.81056	4.43605		7.54976	4.17405		7.32396	3.94455		7.13316	3.74755		6.97736	3.58305		6.70416	3.25005		7.81056	4.43605		7.54976	4.17405		7.32396	3.94455		7.13316	3.74755		6.97736	3.58305		6.70416	3.25005		7.81056	4.43605		7.54976	4.17405		7.32396	3.94455		7.13316	3.74755
54		7.80707	4.43247		7.54627	4.17047		7.32047	3.94097		7.12967	3.74397		6.97387	3.57947		6.70067	3.24647		7.80707	4.43247		7.54627	4.17047		7.32047	3.94097		7.12967	3.74397		6.97387	3.57947		6.70067	3.24647		7.80707	4.43247		7.54627	4.17047		7.32047	3.94097		7.12967	3.74397
55		7.80423	4.42931		7.54343	4.16731		7.31763	3.93781		7.12683	3.74081		6.97103	3.57631		6.69783	3.24331		7.80423	4.42931		7.54343	4.16731		7.31763	3.93781		7.12683	3.74081		6.97103	3.57631		6.69783	3.24331		7.80423	4.42931		7.54343	4.16731		7.31763	3.93781		7.12683	3.74081
56		7.8014	4.42616		7.5406	4.16416		7.3148	3.93466		7.124	3.73766		6.9682	3.57316		6.695	3.24016		7.8014	4.42616		7.5406	4.16416		7.3148	3.93466		7.124	3.73766		6.9682	3.57316		6.695	3.24016		7.8014	4.42616		7.5406	4.16416		7.3148	3.93466		7.124	3.73766
57		7.79922	4.42344		7.53842	4.16144		7.31262	3.93194		7.12182	3.73494		6.96602	3.57044		6.69282	3.23744		7.79922	4.42344		7.53842	4.16144		7.31262	3.93194		7.12182	3.73494		6.96602	3.57044		6.69282	3.23744		7.79922	4.42344		7.53842	4.16144		7.31262	3.93194		7.12182	3.73494
58		7.79638	4.42029		7.53558	4.15829		7.30978	3.92879		7.11898	3.73179		6.96318	3.56729		6.68998	3.23429		7.79638	4.42029		7.53558	4.15829		7.30978	3.92879		7.11898	3.73179		6.96318	3.56729		6.68998	3.23429		7.79638	4.42029		7.53558	4.15829		7.30978	3.92879		7.11898	3.73179
59		7.7942	4.41757		7.5334	4.15557		7.3076	3.92607		7.1168	3.72907		6.961	3.56457		6.6878	3.23157		7.7942	4.41757		7.5334	4.15557		7.3076	3.92607		7.1168	3.72907		6.961	3.56457		6.6878	3.23157		7.7942	4.41757		7.5334	4.15557		7.3076	3.92607		7.1168	3.72907
60		7.79201	4.41486		7.53121	4.15286		7.30541	3.92336		7.11461	3.72636		6.95881	3.56186		6.68561	3.22886		7.79201	4.41486		7.53121	4.15286		7.30541	3.92336		7.11461	3.72636		6.95881	3.56186		6.68561	3.22886		7.79201	4.41486		7.53121	4.15286		7.30541	3.92336		7.11461	3.72636
61		7.79048	4.41257		7.52968	4.15057		7.30388	3.92107		7.11308	3.72407		6.95728	3.55957		6.68408	3.22657		7.79048	4.41257		7.52968	4.15057		7.30388	3.92107		7.11308	3.72407		6.95728	3.55957		6.68408	3.22657		7.79048	4.41257		7.52968	4.15057		7.30388	3.92107		7.11308	3.72407
62		7.78829	4.40986		7.52749	4.14786		7.30169	3.91836		7.11089	3.72136		6.95509	3.55686		6.68189	3.22386		7.78829	4.40986		7.52749	4.14786		7.30169	3.91836		7.11089	3.72136		6.95509	3.55686		6.68189	3.22386		7.78829	4.40986		7.52749	4.14786		7.30169	3.91836		7.11089	3.72136
63		7.78676	4.40757		7.52596	4.14557		7.30016	3.91607		7.10936	3.71907		6.95356	3.55457		6.68036	3.22157		7.78676	4.40757		7.52596	4.14557		7.30016	3.91607		7.10936	3.71907		6.95356	3.55457		6.68036	3.22157		7.78676	4.40757		7.52596	4.14557		7.30016	3.91607		7.10936	3.71907
64		7.78522	4.40529		7.52442	4.14329		7.29862	3.91379		7.10782	3.71679		6.95202	3.55229		6.67882	3.21929		7.78522	4.40529		7.52442	4.14329		7.29862	3.91379		7.10782	3.71679		6.95202	3.55229		6.67882	3.21929		7.78522	4.40529		7.52442	4.14329		7.29862	3.91379		7.10782	3.71679
65		7.78435	4.40344		7.52355	4.14144		7.29775	3.91194		7.10695	3.71494		6.95115	3.55044		6.67795	3.21744		7.78435	4.40344		7.52355	4.14144		7.29775	3.91194		7.10695	3.71494		6.95115	3.55044		6.67795	3.21744		7.78435	4.40344		7.52355	4.14144		7.29775	3.91194		7.10695	3.71494
66		7.7828	4.40116		7.522	4.13916		7.2962	3.90966		7.1054	3.71266		6.9496	3.54816		6.6764	3.21516		7.7828	4.40116		7.522	4.13916		7.2962	3.90966		7.1054	3.71266		6.9496	3.54816		6.6764	3.21516		7.7828	4.40116		7.522	4.13916		7.2962	3.90966		7.1054	3.71266
67		7.78192	4.39931		7.52112	4.13731		7.29532	3.90781		7.10452	3.71081		6.94872	3.54631		6.67552	3.21331		7.78192	4.39931		7.52112	4.13731		7.29532	3.90781		7.10452	3.71081		6.94872	3.54631		6.67552	3.21331		7.78192	4.39931		7.52112	4.13731		7.29532	3.90781		7.10452	3.71081
68		7.78103	4.39746		7.52023	4.13546		7.29443	3.90596		7.10363	3.70896		6.94783	3.54446		6.67463	3.21146		7.78103	4.39746		7.52023	4.13546		7.29443	3.90596		7.10363	3.70896		6.94783	3.54446		6.67463	3.21146		7.78103	4.39746		7.52023	4.13546		7.29443	3.90596		7.10363	3.70896
69		7.7808	4.39605		7.52	4.13405		7.2942	3.90455		7.1034	3.70755		6.9476	3.54305		6.6744	3.21005		7.7808	4.39605		7.52	4.13405		7.2942	3.90455		7.1034	3.70755		6.9476	3.54305		6.6744	3.21005		7.7808	4.39605		7.52	4.13405		7.2942	3.90455		7.1034	3.70755
70		7.77991	4.3942		7.51911	4.1322		7.29331	3.9027		7.10251	3.7057		6.94671	3.5412		6.67351	3.2082		7.77991	4.3942		7.51911	4.1322		7.29331	3.9027		7.10251	3.7057		6.94671	3.5412		6.67351	3.2082		7.77991	4.3942		7.51911	4.1322		7.29331	3.9027		7.10251	3.7057
71		7.77968	4.39279		7.51888	4.13079		7.29308	3.90129		7.10228	3.70429		6.94648	3.53979		6.67328	3.20679		7.77968	4.39279		7.51888	4.13079		7.29308	3.90129		7.10228	3.70429		6.94648	3.53979		6.67328	3.20679		7.77968	4.39279		7.51888	4.13079		7.29308	3.90129		7.10228	3.70429
72		7.77944	4.39137		7.51864	4.12937		7.29284	3.89987		7.10204	3.70287		6.94624	3.53837		6.67304	3.20537		7.77944	4.39137		7.51864	4.12937		7.29284	3.89987		7.10204	3.70287		6.94624	3.53837		6.67304	3.20537		7.77944	4.39137		7.51864	4.12937		7.29284	3.89987		7.10204	3.70287
73		7.77919	4.38996		7.51839	4.12796		7.29259	3.89846		7.10179	3.70146		6.94599	3.53696		6.67279	3.20396		7.77919	4.38996		7.51839	4.12796		7.29259	3.89846		7.10179	3.70146		6.94599	3.53696		6.67279	3.20396		7.77919	4.38996		7.51839	4.12796		7.29259	3.89846		7.10179	3.70146
74		7.77961	4.38898		7.51881	4.12698		7.29301	3.89748		7.10221	3.70048		6.94641	3.53598		6.67321	3.20298		7.77961	4.38898		7.51881	4.12698		7.29301	3.89748		7.10221	3.70048		6.94641	3.53598		6.67321	3.20298		7.77961	4.38898		7.51881	4.12698		7.29301	3.89748		7.10221	3.70048
75		7.77936	4.38757		7.51856	4.12557		7.29276	3.89607		7.10196	3.69907		6.94616	3.53457		6.67296	3.20157		7.77936	4.38757		7.51856	4.12557		7.29276	3.89607		7.10196	3.69907		6.94616	3.53457		6.67296	3.20157		7.77936	4.38757		7.51856	4.12557		7.29276	3.89607		7.10196	3.69907
76		7.77976	4.38658		7.51896	4.12458		7.29316	3.89508		7.10236	3.69808		6.94656	3.53358		6.67336	3.20058		7.77976	4.38658		7.51896	4.12458		7.29316	3.89508		7.10236	3.69808		6.94656	3.53358		6.67336	3.20058		7.77976	4.38658		7.51896	4.12458		7.29316	3.89508		7.10236	3.69808
77		7.78017	4.3856		7.51937	4.1236		7.29357	3.8941		7.10277	3.6971		6.94697	3.5326		6.67377	3.1996		7.78017	4.3856		7.51937	4.1236		7.29357	3.8941		7.10277	3.6971		6.94697	3.5326		6.67377	3.1996		7.78017	4.3856		7.51937	4.1236		7.29357	3.8941		7.10277	3.6971
78		7.78122	4.38505		7.52042	4.12305		7.29462	3.89355		7.10382	3.69655		6.94802	3.53205		6.67482	3.19905		7.78122	4.38505		7.52042	4.12305		7.29462	3.89355		7.10382	3.69655		6.94802	3.53205		6.67482	3.19905		7.78122	4.38505		7.52042	4.12305		7.29462	3.89355		7.10382	3.69655
79		7.78162	4.38407		7.52082	4.12207		7.29502	3.89257		7.10422	3.69557		6.94842	3.53107		6.67522	3.19807		7.78162	4.38407		7.52082	4.12207		7.29502	3.89257		7.10422	3.69557		6.94842	3.53107		6.67522	3.19807		7.78162	4.38407		7.52082	4.12207		7.29502	3.89257		7.10422	3.69557
80		7.78267	4.38352		7.52187	4.12152		7.29607	3.89202		7.10527	3.69502		6.94947	3.53052		6.67627	3.19752		7.78267	4.38352		7.52187	4.12152		7.29607	3.89202		7.10527	3.69502		6.94947	3.53052		6.67627	3.19752		7.78267	4.38352		7.52187	4.12152		7.29607	3.89202		7.10527	3.69502
81		7.79993	4.38924		7.53913	4.12724		7.31333	3.89774		7.12253	3.70074		6.96673	3.53624		6.69353	3.20324		7.79993	4.38924		7.53913	4.12724		7.31333	3.89774		7.12253	3.70074		6.96673	3.53624		6.69353	3.20324		7.79993	4.38924		7.53913	4.12724		7.31333	3.89774		7.12253	3.70074
82		7.80099	4.38871		7.54019	4.12671		7.31439	3.89721		7.12359	3.70021		6.96779	3.53571		6.69459	3.20271		7.80099	4.38871		7.54019	4.12671		7.31439	3.89721		7.12359	3.70021		6.96779	3.53571		6.69459	3.20271		7.80099	4.38871		7.54019	4.12671		7.31439	3.89721		7.12359	3.70021
83		7.80205	4.38817		7.54125	4.12617		7.31545	3.89667		7.12465	3.69967		6.96885	3.53517		6.69565	3.20217		7.80205	4.38817		7.54125	4.12617		7.31545	3.89667		7.12465	3.69967		6.96885	3.53517		6.69565	3.20217		7.80205	4.38817		7.54125	4.12617		7.31545	3.89667		7.12465	3.69967
84		7.8031	4.38764		7.5423	4.12564		7.3165	3.89614		7.1257	3.69914		6.9699	3.53464		6.6967	3.20164		7.8031	4.38764		7.5423	4.12564		7.3165	3.89614		7.1257	3.69914		6.9699	3.53464		6.6967	3.20164		7.8031	4.38764		7.5423	4.12564		7.3165	3.89614		7.1257	3.69914
85		7.8048	4.38753		7.544	4.12553		7.3182	3.89603		7.1274	3.69903		6.9716	3.53453		6.6984	3.20153		7.8048	4.38753		7.544	4.12553		7.3182	3.89603		7.1274	3.69903		6.9716	3.53453		6.6984	3.20153		7.8048	4.38753		7.544	4.12553		7.3182	3.89603		7.1274	3.69903
86		7.80649	4.38742		7.54569	4.12542		7.31989	3.89592		7.12909	3.69892		6.97329	3.53442		6.70009	3.20142		7.80649	4.38742		7.54569	4.12542		7.31989	3.89592		7.12909	3.69892		6.97329	3.53442		6.70009	3.20142		7.80649	4.38742		7.54569	4.12542		7.31989	3.89592		7.12909	3.69892
87		7.80818	4.38731		7.54738	4.12531		7.32158	3.89581		7.13078	3.69881		6.97498	3.53431		6.70178	3.20131		7.80818	4.38731		7.54738	4.12531		7.32158	3.89581		7.13078	3.69881		6.97498	3.53431		6.70178	3.20131		7.80818	4.38731		7.54738	4.12531		7.32158	3.89581		7.13078	3.69881
88		7.80987	4.3872		7.54907	4.1252		7.32327	3.8957		7.13247	3.6987		6.97667	3.5342		6.70347	3.2012		7.80987	4.3872		7.54907	4.1252		7.32327	3.8957		7.13247	3.6987		6.97667	3.5342		6.70347	3.2012		7.80987	4.3872		7.54907	4.1252		7.32327	3.8957		7.13247	3.6987
89		7.81155	4.38709		7.55075	4.12509		7.32495	3.89559		7.13415	3.69859		6.97835	3.53409		6.70515	3.20109		7.81155	4.38709		7.55075	4.12509		7.32495	3.89559		7.13415	3.69859		6.97835	3.53409		6.70515	3.20109		7.81155	4.38709		7.55075	4.12509		7.32495	3.89559		7.13415	3.69859
90		7.81322	4.38698		7.55242	4.12498		7.32662	3.89548		7.13582	3.69848		6.98002	3.53398		6.70682	3.20098		7.81322	4.38698		7.55242	4.12498		7.32662	3.89548		7.13582	3.69848		6.98002	3.53398		6.70682	3.20098		7.81322	4.38698		7.55242	4.12498		7.32662	3.89548		7.13582	3.69848
91		7.81554	4.3873		7.55474	4.1253		7.32894	3.8958		7.13814	3.6988		6.98234	3.5343		6.70914	3.2013		7.81554	4.3873		7.55474	4.1253		7.32894	3.8958		7.13814	3.6988		6.98234	3.5343		6.70914	3.2013		7.81554	4.3873		7.55474	4.1253		7.32894	3.8958		7.13814	3.6988
92		7.81721	4.38718		7.55641	4.12518		7.33061	3.89568		7.13981	3.69868		6.98401	3.53418		6.71081	3.20118		7.81721	4.38718		7.55641	4.12518		7.33061	3.89568		7.13981	3.69868		6.98401	3.53418		6.71081	3.20118		7.81721	4.38718		7.55641	4.12518		7.33061	3.89568		7.13981	3.69868
93		7.81952	4.3875		7.55872	4.1255		7.33292	3.896		7.14212	3.699		6.98632	3.5345		6.71312	3.2015		7.81952	4.3875		7.55872	4.1255		7.33292	3.896		7.14212	3.699		6.98632	3.5345		6.71312	3.2015		7.81952	4.3875		7.55872	4.1255		7.33292	3.896		7.14212	3.699
94		7.82182	4.38781		7.56102	4.12581		7.33522	3.89631		7.14442	3.69931		6.98862	3.53481		6.71542	3.20181		7.82182	4.38781		7.56102	4.12581		7.33522	3.89631		7.14442	3.69931		6.98862	3.53481		6.71542	3.20181		7.82182	4.38781		7.56102	4.12581		7.33522	3.89631		7.14442	3.69931
95		7.82412	4.38812		7.56332	4.12612		7.33752	3.89662		7.14672	3.69962		6.99092	3.53512		6.71772	3.20212		7.82412	4.38812		7.56332	4.12612		7.33752	3.89662		7.14672	3.69962		6.99092	3.53512		6.71772	3.20212		7.82412	4.38812		7.56332	4.12612		7.33752	3.89662		7.14672	3.69962
96		7.82706	4.38885		7.56626	4.12685		7.34046	3.89735		7.14966	3.70035		6.99386	3.53585		6.72066	3.20285		7.82706	4.38885		7.56626	4.12685		7.34046	3.89735		7.14966	3.70035		6.99386	3.53585		6.72066	3.20285		7.82706	4.38885		7.56626	4.12685		7.34046	3.89735		7.14966	3.70035
97		7.82935	4.38916		7.56855	4.12716		7.34275	3.89766		7.15195	3.70066		6.99615	3.53616		6.72295	3.20316		7.82935	4.38916		7.56855	4.12716		7.34275	3.89766		7.15195	3.70066		6.99615	3.53616		6.72295	3.20316		7.82935	4.38916		7.56855	4.12716		7.34275	3.89766		7.15195	3.70066
98		7.83228	4.38989		7.57148	4.12789		7.34568	3.89839		7.15488	3.70139		6.99908	3.53689		6.72588	3.20389		7.83228	4.38989		7.57148	4.12789		7.34568	3.89839		7.15488	3.70139		6.99908	3.53689		6.72588	3.20389		7.83228	4.38989		7.57148	4.12789		7.34568	3.89839		7.15488	3.70139
99		7.83456	4.3902		7.57376	4.1282		7.34796	3.8987		7.15716	3.7017		7.00136	3.5372		6.72816	3.2042		7.83456	4.3902		7.57376	4.1282		7.34796	3.8987		7.15716	3.7017		7.00136	3.5372		6.72816	3.2042		7.83456	4.3902		7.57376	4.1282		7.34796	3.8987		7.15716	3.7017
100		7.83748	4.39093		7.57668	4.12893		7.35088	3.89943		7.16008	3.70243		7.00428	3.53793		6.73108	3.20493		7.83748	4.39093		7.57668	4.12893		7.35088	3.89943		7.16008	3.70243		7.00428	3.53793		6.73108	3.20493		7.83748	4.39093		7.57668	4.12893		7.35088	3.89943		7.16008	3.70243
101		7.84039	4.39166		7.57959	4.12966		7.35379	3.90016		7.16299	3.70316		7.00719	3.53866		6.73399	3.20566		7.84039	4.39166		7.57959	4.12966		7.35379	3.90016		7.16299	3.70316		7.00719	3.53866		6.73399	3.20566		7.84039	4.39166		7.57959	4.12966		7.35379	3.90016		7.16299	3.70316
102		7.8433	4.39238		7.5825	4.13038		7.3567	3.90088		7.1659	3.70388		7.0101	3.53938		6.7369	3.20638		7.8433	4.39238		7.5825	4.13038		7.3567	3.90088		7.1659	3.70388		7.0101	3.53938		6.7369	3.20638		7.8433	4.39238		7.5825	4.13038		7.3567	3.90088		7.1659	3.70388
103		7.8462	4.39311		7.5854	4.13111		7.3596	3.90161		7.1688	3.70461		7.013	3.54011		6.7398	3.20711		7.8462	4.39311		7.5854	4.13111		7.3596	3.90161		7.1688	3.70461		7.013	3.54011		6.7398	3.20711		7.8462	4.39311		7.5854	4.13111		7.3596	3.90161		7.1688	3.70461
104		7.84909	4.39383		7.58829	4.13183		7.36249	3.90233		7.17169	3.70533		7.01589	3.54083		6.74269	3.20783		7.84909	4.39383		7.58829	4.13183		7.36249	3.90233		7.17169	3.70533		7.01589	3.54083		6.74269	3.20783		7.84909	4.39383		7.58829	4.13183		7.36249	3.90233		7.17169	3.70533
105		7.85198	4.39455		7.59118	4.13255		7.36538	3.90305		7.17458	3.70605		7.01878	3.54155		6.74558	3.20855		7.85198	4.39455		7.59118	4.13255		7.36538	3.90305		7.17458	3.70605		7.01878	3.54155		6.74558	3.20855		7.85198	4.39455		7.59118	4.13255		7.36538	3.90305		7.17458	3.70605
106		7.85551	4.3957		7.59471	4.1337		7.36891	3.9042		7.17811	3.7072		7.02231	3.5427		6.74911	3.2097		7.85551	4.3957		7.59471	4.1337		7.36891	3.9042		7.17811	3.7072		7.02231	3.5427		6.74911	3.2097		7.85551	4.3957		7.59471	4.1337		7.36891	3.9042		7.17811	3.7072
107		7.85839	4.39642		7.59759	4.13442		7.37179	3.90492		7.18099	3.70792		7.02519	3.54342		6.75199	3.21042		7.85839	4.39642		7.59759	4.13442		7.37179	3.90492		7.18099	3.70792		7.02519	3.54342		6.75199	3.21042		7.85839	4.39642		7.59759	4.13442		7.37179	3.90492		7.18099	3.70792
108		7.86191	4.39756		7.60111	4.13556		7.37531	3.90606		7.18451	3.70906		7.02871	3.54456		6.75551	3.21156		7.86191	4.39756		7.60111	4.13556		7.37531	3.90606		7.18451	3.70906		7.02871	3.54456		6.75551	3.21156		7.86191	4.39756		7.60111	4.13556		7.37531	3.90606		7.18451	3.70906
109		7.86478	4.39828		7.60398	4.13628		7.37818	3.90678		7.18738	3.70978		7.03158	3.54528		6.75838	3.21228		7.86478	4.39828		7.60398	4.13628		7.37818	3.90678		7.18738	3.70978		7.03158	3.54528		6.75838	3.21228		7.86478	4.39828		7.60398	4.13628		7.37818	3.90678		7.18738	3.70978
110		7.86828	4.39942		7.60748	4.13742		7.38168	3.90792		7.19088	3.71092		7.03508	3.54642		6.76188	3.21342		7.86828	4.39942		7.60748	4.13742		7.38168	3.90792		7.19088	3.71092		7.03508	3.54642		6.76188	3.21342		7.86828	4.39942		7.60748	4.13742		7.38168	3.90792		7.19088	3.71092
111		7.87178	4.40056		7.61098	4.13856		7.38518	3.90906		7.19438	3.71206		7.03858	3.54756		6.76538	3.21456		7.87178	4.40056		7.61098	4.13856		7.38518	3.90906		7.19438	3.71206		7.03858	3.54756		6.76538	3.21456		7.87178	4.40056		7.61098	4.13856		7.38518	3.90906		7.19438	3.71206
112		7.87528	4.4017		7.61448	4.1397		7.38868	3.9102		7.19788	3.7132		7.04208	3.5487		6.76888	3.2157		7.87528	4.4017		7.61448	4.1397		7.38868	3.9102		7.19788	3.7132		7.04208	3.5487		6.76888	3.2157		7.87528	4.4017		7.61448	4.1397		7.38868	3.9102		7.19788	3.7132
113		7.87876	4.40283		7.61796	4.14083		7.39216	3.91133		7.20136	3.71433		7.04556	3.54983		6.77236	3.21683		7.87876	4.40283		7.61796	4.14083		7.39216	3.91133		7.20136	3.71433		7.04556	3.54983		6.77236	3.21683		7.87876	4.40283		7.61796	4.14083		7.39216	3.91133		7.20136	3.71433
114		7.88225	4.40396		7.62145	4.14196		7.39565	3.91246		7.20485	3.71546		7.04905	3.55096		6.77585	3.21796		7.88225	4.40396		7.62145	4.14196		7.39565	3.91246		7.20485	3.71546		7.04905	3.55096		6.77585	3.21796		7.88225	4.40396		7.62145	4.14196		7.39565	3.91246		7.20485	3.71546
115		7.88572	4.4051		7.62492	4.1431		7.39912	3.9136		7.20832	3.7166		7.05252	3.5521		6.77932	3.2191		7.88572	4.4051		7.62492	4.1431		7.39912	3.9136		7.20832	3.7166		7.05252	3.5521		6.77932	3.2191		7.88572	4.4051		7.62492	4.1431		7.39912	3.9136		7.20832	3.7166
116		7.88919	4.40623		7.62839	4.14423		7.40259	3.91473		7.21179	3.71773		7.05599	3.55323		6.78279	3.22023		7.88919	4.40623		7.62839	4.14423		7.40259	3.91473		7.21179	3.71773		7.05599	3.55323		6.78279	3.22023		7.88919	4.40623		7.62839	4.14423		7.40259	3.91473		7.21179	3.71773
117		7.89266	4.40736		7.63186	4.14536		7.40606	3.91586		7.21526	3.71886		7.05946	3.55436		6.78626	3.22136		7.89266	4.40736		7.63186	4.14536		7.40606	3.91586		7.21526	3.71886		7.05946	3.55436		6.78626	3.22136		7.89266	4.40736		7.63186	4.14536		7.40606	3.91586		7.21526	3.71886
118		7.89612	4.40848		7.63532	4.14648		7.40952	3.91698		7.21872	3.71998		7.06292	3.55548		6.78972	3.22248		7.89612	4.40848		7.63532	4.14648		7.40952	3.91698		7.21872	3.71998		7.06292	3.55548		6.78972	3.22248		7.89612	4.40848		7.63532	4.14648		7.40952	3.91698		7.21872	3.71998
119		7.90021	4.41003		7.63941	4.14803		7.41361	3.91853		7.22281	3.72153		7.06701	3.55703		6.79381	3.22403		7.90021	4.41003		7.63941	4.14803		7.41361	3.91853		7.22281	3.72153		7.06701	3.55703		6.79381	3.22403		7.90021	4.41003		7.63941	4.14803		7.41361	3.91853		7.22281	3.72153
120		7.90366	4.41116		7.64286	4.14916		7.41706	3.91966		7.22626	3.72266		7.07046	3.55816		6.79726	3.22516		7.90366	4.41116		7.64286	4.14916		7.41706	3.91966		7.22626	3.72266		7.07046	3.55816		6.79726	3.22516		7.90366	4.41116		7.64286	4.14916		7.41706	3.91966		7.22626	3.72266
BUD		LAB at 50 km																		LAB at 55 km																		LAB at 60 km
		no melt			melt 0.5%			melt 1%			melt 1.5%			melt 2%			melt 4%			no melt			melt 0.5%			melt 1%			melt 1.5%			melt 2%			melt 4%			no melt			melt 0.5%			melt 1%			melt 1.5%
Depth		Vp	Vs		Vp	Vs		Vp	Vs		Vp	Vs		Vp	Vs		Vp	Vs		Vp	Vs		Vp	Vs		Vp	Vs		Vp	Vs		Vp	Vs		Vp	Vs		Vp	Vs		Vp	Vs		Vp	Vs		Vp	Vs
1		3.25833	2.01833		3.25833	2.01833		3.25833	2.01833		3.25833	2.01833		3.25833	2.01833		3.25833	2.01833		3.25833	2.01833		3.25833	2.01833		3.25833	2.01833		3.25833	2.01833		3.25833	2.01833		3.25833	2.01833		3.25833	2.01833		3.25833	2.01833		3.25833	2.01833		3.25833	2.01833
2		4.16851	2.54377		4.16851	2.54377		4.16851	2.54377		4.16851	2.54377		4.16851	2.54377		4.16851	2.54377		4.16851	2.54377		4.16851	2.54377		4.16851	2.54377		4.16851	2.54377		4.16851	2.54377		4.16851	2.54377		4.16851	2.54377		4.16851	2.54377		4.16851	2.54377		4.16851	2.54377
3		5.07868	3.0692		5.07868	3.0692		5.07868	3.0692		5.07868	3.0692		5.07868	3.0692		5.07868	3.0692		5.07868	3.0692		5.07868	3.0692		5.07868	3.0692		5.07868	3.0692		5.07868	3.0692		5.07868	3.0692		5.07868	3.0692		5.07868	3.0692		5.07868	3.0692		5.07868	3.0692
4		5.98886	3.59464		5.98886	3.59464		5.98886	3.59464		5.98886	3.59464		5.98886	3.59464		5.98886	3.59464		5.98886	3.59464		5.98886	3.59464		5.98886	3.59464		5.98886	3.59464		5.98886	3.59464		5.98886	3.59464		5.98886	3.59464		5.98886	3.59464		5.98886	3.59464		5.98886	3.59464
5		6.00446	3.5994		6.00446	3.5994		6.00446	3.5994		6.00446	3.5994		6.00446	3.5994		6.00446	3.5994		6.00446	3.5994		6.00446	3.5994		6.00446	3.5994		6.00446	3.5994		6.00446	3.5994		6.00446	3.5994		6.00446	3.5994		6.00446	3.5994		6.00446	3.5994		6.00446	3.5994
6		6.02007	3.60417		6.02007	3.60417		6.02007	3.60417		6.02007	3.60417		6.02007	3.60417		6.02007	3.60417		6.02007	3.60417		6.02007	3.60417		6.02007	3.60417		6.02007	3.60417		6.02007	3.60417		6.02007	3.60417		6.02007	3.60417		6.02007	3.60417		6.02007	3.60417		6.02007	3.60417
7		6.03623	3.60704		6.03623	3.60704		6.03623	3.60704		6.03623	3.60704		6.03623	3.60704		6.03623	3.60704		6.03623	3.60704		6.03623	3.60704		6.03623	3.60704		6.03623	3.60704		6.03623	3.60704		6.03623	3.60704		6.03623	3.60704		6.03623	3.60704		6.03623	3.60704		6.03623	3.60704
8		6.05239	3.60991		6.05239	3.60991		6.05239	3.60991		6.05239	3.60991		6.05239	3.60991		6.05239	3.60991		6.05239	3.60991		6.05239	3.60991		6.05239	3.60991		6.05239	3.60991		6.05239	3.60991		6.05239	3.60991		6.05239	3.60991		6.05239	3.60991		6.05239	3.60991		6.05239	3.60991
9		6.06855	3.61278		6.06855	3.61278		6.06855	3.61278		6.06855	3.61278		6.06855	3.61278		6.06855	3.61278		6.06855	3.61278		6.06855	3.61278		6.06855	3.61278		6.06855	3.61278		6.06855	3.61278		6.06855	3.61278		6.06855	3.61278		6.06855	3.61278		6.06855	3.61278		6.06855	3.61278
10		6.08471	3.61565		6.08471	3.61565		6.08471	3.61565		6.08471	3.61565		6.08471	3.61565		6.08471	3.61565		6.08471	3.61565		6.08471	3.61565		6.08471	3.61565		6.08471	3.61565		6.08471	3.61565		6.08471	3.61565		6.08471	3.61565		6.08471	3.61565		6.08471	3.61565		6.08471	3.61565
11		6.13095	3.62659		6.13095	3.62659		6.13095	3.62659		6.13095	3.62659		6.13095	3.62659		6.13095	3.62659		6.13095	3.62659		6.13095	3.62659		6.13095	3.62659		6.13095	3.62659		6.13095	3.62659		6.13095	3.62659		6.13095	3.62659		6.13095	3.62659		6.13095	3.62659		6.13095	3.62659
12		6.17719	3.63753		6.17719	3.63753		6.17719	3.63753		6.17719	3.63753		6.17719	3.63753		6.17719	3.63753		6.17719	3.63753		6.17719	3.63753		6.17719	3.63753		6.17719	3.63753		6.17719	3.63753		6.17719	3.63753		6.17719	3.63753		6.17719	3.63753		6.17719	3.63753		6.17719	3.63753
13		6.22343	3.64847		6.22343	3.64847		6.22343	3.64847		6.22343	3.64847		6.22343	3.64847		6.22343	3.64847		6.22343	3.64847		6.22343	3.64847		6.22343	3.64847		6.22343	3.64847		6.22343	3.64847		6.22343	3.64847		6.22343	3.64847		6.22343	3.64847		6.22343	3.64847		6.22343	3.64847
14		6.26967	3.65942		6.26967	3.65942		6.26967	3.65942		6.26967	3.65942		6.26967	3.65942		6.26967	3.65942		6.26967	3.65942		6.26967	3.65942		6.26967	3.65942		6.26967	3.65942		6.26967	3.65942		6.26967	3.65942		6.26967	3.65942		6.26967	3.65942		6.26967	3.65942		6.26967	3.65942
15		6.31591	3.67036		6.31591	3.67036		6.31591	3.67036		6.31591	3.67036		6.31591	3.67036		6.31591	3.67036		6.31591	3.67036		6.31591	3.67036		6.31591	3.67036		6.31591	3.67036		6.31591	3.67036		6.31591	3.67036		6.31591	3.67036		6.31591	3.67036		6.31591	3.67036		6.31591	3.67036
16		6.39178	3.68875		6.39178	3.68875		6.39178	3.68875		6.39178	3.68875		6.39178	3.68875		6.39178	3.68875		6.39178	3.68875		6.39178	3.68875		6.39178	3.68875		6.39178	3.68875		6.39178	3.68875		6.39178	3.68875		6.39178	3.68875		6.39178	3.68875		6.39178	3.68875		6.39178	3.68875
17		6.46765	3.70715		6.46765	3.70715		6.46765	3.70715		6.46765	3.70715		6.46765	3.70715		6.46765	3.70715		6.46765	3.70715		6.46765	3.70715		6.46765	3.70715		6.46765	3.70715		6.46765	3.70715		6.46765	3.70715		6.46765	3.70715		6.46765	3.70715		6.46765	3.70715		6.46765	3.70715
18		6.54352	3.72554		6.54352	3.72554		6.54352	3.72554		6.54352	3.72554		6.54352	3.72554		6.54352	3.72554		6.54352	3.72554		6.54352	3.72554		6.54352	3.72554		6.54352	3.72554		6.54352	3.72554		6.54352	3.72554		6.54352	3.72554		6.54352	3.72554		6.54352	3.72554		6.54352	3.72554
19		6.61939	3.74394		6.61939	3.74394		6.61939	3.74394		6.61939	3.74394		6.61939	3.74394		6.61939	3.74394		6.61939	3.74394		6.61939	3.74394		6.61939	3.74394		6.61939	3.74394		6.61939	3.74394		6.61939	3.74394		6.61939	3.74394		6.61939	3.74394		6.61939	3.74394		6.61939	3.74394
20		6.69526	3.76234		6.69526	3.76234		6.69526	3.76234		6.69526	3.76234		6.69526	3.76234		6.69526	3.76234		6.69526	3.76234		6.69526	3.76234		6.69526	3.76234		6.69526	3.76234		6.69526	3.76234		6.69526	3.76234		6.69526	3.76234		6.69526	3.76234		6.69526	3.76234		6.69526	3.76234
21		6.79908	3.81113		6.79908	3.81113		6.79908	3.81113		6.79908	3.81113		6.79908	3.81113		6.79908	3.81113		6.79908	3.81113		6.79908	3.81113		6.79908	3.81113		6.79908	3.81113		6.79908	3.81113		6.79908	3.81113		6.79908	3.81113		6.79908	3.81113		6.79908	3.81113		6.79908	3.81113
22		6.90289	3.85992		6.90289	3.85992		6.90289	3.85992		6.90289	3.85992		6.90289	3.85992		6.90289	3.85992		6.90289	3.85992		6.90289	3.85992		6.90289	3.85992		6.90289	3.85992		6.90289	3.85992		6.90289	3.85992		6.90289	3.85992		6.90289	3.85992		6.90289	3.85992		6.90289	3.85992
23		7.0067	3.9087		7.0067	3.9087		7.0067	3.9087		7.0067	3.9087		7.0067	3.9087		7.0067	3.9087		7.0067	3.9087		7.0067	3.9087		7.0067	3.9087		7.0067	3.9087		7.0067	3.9087		7.0067	3.9087		7.0067	3.9087		7.0067	3.9087		7.0067	3.9087		7.0067	3.9087
24		7.11052	3.95749		7.11052	3.95749		7.11052	3.95749		7.11052	3.95749		7.11052	3.95749		7.11052	3.95749		7.11052	3.95749		7.11052	3.95749		7.11052	3.95749		7.11052	3.95749		7.11052	3.95749		7.11052	3.95749		7.11052	3.95749		7.11052	3.95749		7.11052	3.95749		7.11052	3.95749
25		7.21433	4.00628		7.21433	4.00628		7.21433	4.00628		7.21433	4.00628		7.21433	4.00628		7.21433	4.00628		7.21433	4.00628		7.21433	4.00628		7.21433	4.00628		7.21433	4.00628		7.21433	4.00628		7.21433	4.00628		7.21433	4.00628		7.21433	4.00628		7.21433	4.00628		7.21433	4.00628
26		7.29481	4.05467		7.29481	4.05467		7.29481	4.05467		7.29481	4.05467		7.29481	4.05467		7.29481	4.05467		7.29481	4.05467		7.29481	4.05467		7.29481	4.05467		7.29481	4.05467		7.29481	4.05467		7.29481	4.05467		7.29481	4.05467		7.29481	4.05467		7.29481	4.05467		7.29481	4.05467
27		7.3753	4.10306		7.3753	4.10306		7.3753	4.10306		7.3753	4.10306		7.3753	4.10306		7.3753	4.10306		7.3753	4.10306		7.3753	4.10306		7.3753	4.10306		7.3753	4.10306		7.3753	4.10306		7.3753	4.10306		7.3753	4.10306		7.3753	4.10306		7.3753	4.10306		7.3753	4.10306
28		7.45578	4.15145		7.45578	4.15145		7.45578	4.15145		7.45578	4.15145		7.45578	4.15145		7.45578	4.15145		7.45578	4.15145		7.45578	4.15145		7.45578	4.15145		7.45578	4.15145		7.45578	4.15145		7.45578	4.15145		7.45578	4.15145		7.45578	4.15145		7.45578	4.15145		7.45578	4.15145
29		7.53626	4.19983		7.53626	4.19983		7.53626	4.19983		7.53626	4.19983		7.53626	4.19983		7.53626	4.19983		7.53626	4.19983		7.53626	4.19983		7.53626	4.19983		7.53626	4.19983		7.53626	4.19983		7.53626	4.19983		7.53626	4.19983		7.53626	4.19983		7.53626	4.19983		7.53626	4.19983
30		7.93162	4.54607		7.93162	4.54607		7.93162	4.54607		7.93162	4.54607		7.93162	4.54607		7.93162	4.54607		7.93162	4.54607		7.93162	4.54607		7.93162	4.54607		7.93162	4.54607		7.93162	4.54607		7.93162	4.54607		7.93162	4.54607		7.93162	4.54607		7.93162	4.54607		7.93162	4.54607
31		7.9238	4.53957		7.9238	4.53957		7.9238	4.53957		7.9238	4.53957		7.9238	4.53957		7.9238	4.53957		7.9238	4.53957		7.9238	4.53957		7.9238	4.53957		7.9238	4.53957		7.9238	4.53957		7.9238	4.53957		7.9238	4.53957		7.9238	4.53957		7.9238	4.53957		7.9238	4.53957
32		7.91661	4.53348		7.91661	4.53348		7.91661	4.53348		7.91661	4.53348		7.91661	4.53348		7.91661	4.53348		7.91661	4.53348		7.91661	4.53348		7.91661	4.53348		7.91661	4.53348		7.91661	4.53348		7.91661	4.53348		7.91661	4.53348		7.91661	4.53348		7.91661	4.53348		7.91661	4.53348
33		7.90938	4.52739		7.90938	4.52739		7.90938	4.52739		7.90938	4.52739		7.90938	4.52739		7.90938	4.52739		7.90938	4.52739		7.90938	4.52739		7.90938	4.52739		7.90938	4.52739		7.90938	4.52739		7.90938	4.52739		7.90938	4.52739		7.90938	4.52739		7.90938	4.52739		7.90938	4.52739
34		7.90214	4.52128		7.90214	4.52128		7.90214	4.52128		7.90214	4.52128		7.90214	4.52128		7.90214	4.52128		7.90214	4.52128		7.90214	4.52128		7.90214	4.52128		7.90214	4.52128		7.90214	4.52128		7.90214	4.52128		7.90214	4.52128		7.90214	4.52128		7.90214	4.52128		7.90214	4.52128
35		7.89553	4.51559		7.89553	4.51559		7.89553	4.51559		7.89553	4.51559		7.89553	4.51559		7.89553	4.51559		7.89553	4.51559		7.89553	4.51559		7.89553	4.51559		7.89553	4.51559		7.89553	4.51559		7.89553	4.51559		7.89553	4.51559		7.89553	4.51559		7.89553	4.51559		7.89553	4.51559
36		7.8889	4.5099		7.8889	4.5099		7.8889	4.5099		7.8889	4.5099		7.8889	4.5099		7.8889	4.5099		7.8889	4.5099		7.8889	4.5099		7.8889	4.5099		7.8889	4.5099		7.8889	4.5099		7.8889	4.5099		7.8889	4.5099		7.8889	4.5099		7.8889	4.5099		7.8889	4.5099
37		7.88226	4.50419		7.88226	4.50419		7.88226	4.50419		7.88226	4.50419		7.88226	4.50419		7.88226	4.50419		7.88226	4.50419		7.88226	4.50419		7.88226	4.50419		7.88226	4.50419		7.88226	4.50419		7.88226	4.50419		7.88226	4.50419		7.88226	4.50419		7.88226	4.50419		7.88226	4.50419
38		7.87626	4.49892		7.87626	4.49892		7.87626	4.49892		7.87626	4.49892		7.87626	4.49892		7.87626	4.49892		7.87626	4.49892		7.87626	4.49892		7.87626	4.49892		7.87626	4.49892		7.87626	4.49892		7.87626	4.49892		7.87626	4.49892		7.87626	4.49892		7.87626	4.49892		7.87626	4.49892
39		7.87024	4.49363		7.87024	4.49363		7.87024	4.49363		7.87024	4.49363		7.87024	4.49363		7.87024	4.49363		7.87024	4.49363		7.87024	4.49363		7.87024	4.49363		7.87024	4.49363		7.87024	4.49363		7.87024	4.49363		7.87024	4.49363		7.87024	4.49363		7.87024	4.49363		7.87024	4.49363
40		7.86421	4.48834		7.86421	4.48834		7.86421	4.48834		7.86421	4.48834		7.86421	4.48834		7.86421	4.48834		7.86421	4.48834		7.86421	4.48834		7.86421	4.48834		7.86421	4.48834		7.86421	4.48834		7.86421	4.48834		7.86421	4.48834		7.86421	4.48834		7.86421	4.48834		7.86421	4.48834
41		7.85729	4.48249		7.85729	4.48249		7.85729	4.48249		7.85729	4.48249		7.85729	4.48249		7.85729	4.48249		7.85883	4.48348		7.85883	4.48348		7.85883	4.48348		7.85883	4.48348		7.85883	4.48348		7.85883	4.48348		7.85883	4.48348		7.85883	4.48348		7.85883	4.48348		7.85883	4.48348
42		7.84983	4.47629		7.84983	4.47629		7.84983	4.47629		7.84983	4.47629		7.84983	4.47629		7.84983	4.47629		7.85344	4.47862		7.85344	4.47862		7.85344	4.47862		7.85344	4.47862		7.85344	4.47862		7.85344	4.47862		7.85344	4.47862		7.85344	4.47862		7.85344	4.47862		7.85344	4.47862
43		7.84166	4.46964		7.84166	4.46964		7.84166	4.46964		7.84166	4.46964		7.84166	4.46964		7.84166	4.46964		7.84804	4.47375		7.84804	4.47375		7.84804	4.47375		7.84804	4.47375		7.84804	4.47375		7.84804	4.47375		7.84804	4.47375		7.84804	4.47375		7.84804	4.47375		7.84804	4.47375
44		7.83252	4.46236		7.83252	4.46236		7.83252	4.46236		7.83252	4.46236		7.83252	4.46236		7.83252	4.46236		7.84263	4.46888		7.84263	4.46888		7.84263	4.46888		7.84263	4.46888		7.84263	4.46888		7.84263	4.46888		7.84263	4.46888		7.84263	4.46888		7.84263	4.46888		7.84263	4.46888
45		7.82275	4.45468		7.82275	4.45468		7.82275	4.45468		7.82275	4.45468		7.82275	4.45468		7.82275	4.45468		7.83787	4.46444		7.83787	4.46444		7.83787	4.46444		7.83787	4.46444		7.83787	4.46444		7.83787	4.46444		7.83787	4.46444		7.83787	4.46444		7.83787	4.46444		7.83787	4.46444
46		7.81124	4.44589		7.81124	4.44589		7.81124	4.44589		7.81124	4.44589		7.81124	4.44589		7.81124	4.44589		7.83158	4.45902		7.83158	4.45902		7.83158	4.45902		7.83158	4.45902		7.83158	4.45902		7.83158	4.45902		7.8331	4.46		7.8331	4.46		7.8331	4.46		7.8331	4.46
47		7.79806	4.43604		7.79806	4.43604		7.79806	4.43604		7.79806	4.43604		7.79806	4.43604		7.79806	4.43604		7.82543	4.45369		7.82543	4.45369		7.82543	4.45369		7.82543	4.45369		7.82543	4.45369		7.82543	4.45369		7.82899	4.45599		7.82899	4.45599		7.82899	4.45599		7.82899	4.45599
48		7.78176	4.42417		7.78176	4.42417		7.78176	4.42417		7.78176	4.42417		7.78176	4.42417		7.78176	4.42417		7.81857	4.44791		7.81857	4.44791		7.81857	4.44791		7.81857	4.44791		7.81857	4.44791		7.81857	4.44791		7.82488	4.45198		7.82488	4.45198		7.82488	4.45198		7.82488	4.45198
49		7.76128	4.4096		7.76128	4.4096		7.76128	4.4096		7.76128	4.4096		7.76128	4.4096		7.76128	4.4096		7.81075	4.44152		7.81075	4.44152		7.81075	4.44152		7.81075	4.44152		7.81075	4.44152		7.81075	4.44152		7.82075	4.44797		7.82075	4.44797		7.82075	4.44797		7.82075	4.44797
50		7.7352	4.39142		7.7352	4.39142		7.7352	4.39142		7.7352	4.39142		7.7352	4.39142		7.7352	4.39142		7.80166	4.43431		7.80166	4.43431		7.80166	4.43431		7.80166	4.43431		7.80166	4.43431		7.80166	4.43431		7.81663	4.44395		7.81663	4.44395		7.81663	4.44395		7.81663	4.44395
51		7.81753	4.44323		7.55673	4.18123		7.33093	3.95173		7.14013	3.75473		6.98433	3.59023		6.71113	3.25723		7.79151	4.42642		7.79151	4.42642		7.79151	4.42642		7.79151	4.42642		7.79151	4.42642		7.79151	4.42642		7.81165	4.4394		7.81165	4.4394		7.81165	4.4394		7.81165	4.4394
52		7.81404	4.43964		7.55324	4.17764		7.32744	3.94814		7.13664	3.75114		6.98084	3.58664		6.70764	3.25364		7.77904	4.41705		7.77904	4.41705		7.77904	4.41705		7.77904	4.41705		7.77904	4.41705		7.77904	4.41705		7.80615	4.43452		7.80615	4.43452		7.80615	4.43452		7.80615	4.43452
53		7.81056	4.43605		7.54976	4.17405		7.32396	3.94455		7.13316	3.74755		6.97736	3.58305		6.70416	3.25005		7.76348	4.40568		7.76348	4.40568		7.76348	4.40568		7.76348	4.40568		7.76348	4.40568		7.76348	4.40568		7.79995	4.42918		7.79995	4.42918		7.79995	4.42918		7.79995	4.42918
54		7.80707	4.43247		7.54627	4.17047		7.32047	3.94097		7.12967	3.74397		6.97387	3.57947		6.70067	3.24647		7.74377	4.39164		7.74377	4.39164		7.74377	4.39164		7.74377	4.39164		7.74377	4.39164		7.74377	4.39164		7.79281	4.42324		7.79281	4.42324		7.79281	4.42324		7.79281	4.42324
55		7.80423	4.42931		7.54343	4.16731		7.31763	3.93781		7.12683	3.74081		6.97103	3.57631		6.69783	3.24331		7.71913	4.37442		7.71913	4.37442		7.71913	4.37442		7.71913	4.37442		7.71913	4.37442		7.71913	4.37442		7.78505	4.41692		7.78505	4.41692		7.78505	4.41692		7.78505	4.41692
56		7.8014	4.42616		7.5406	4.16416		7.3148	3.93466		7.124	3.73766		6.9682	3.57316		6.695	3.24016		7.8014	4.42616		7.5406	4.16416		7.3148	3.93466		7.124	3.73766		6.9682	3.57316		6.695	3.24016		7.77559	4.4095		7.77559	4.4095		7.77559	4.4095		7.77559	4.4095
57		7.79922	4.42344		7.53842	4.16144		7.31262	3.93194		7.12182	3.73494		6.96602	3.57044		6.69282	3.23744		7.79922	4.42344		7.53842	4.16144		7.31262	3.93194		7.12182	3.73494		6.96602	3.57044		6.69282	3.23744		7.76448	4.40104		7.76448	4.40104		7.76448	4.40104		7.76448	4.40104
58		7.79638	4.42029		7.53558	4.15829		7.30978	3.92879		7.11898	3.73179		6.96318	3.56729		6.68998	3.23429		7.79638	4.42029		7.53558	4.15829		7.30978	3.92879		7.11898	3.73179		6.96318	3.56729		6.68998	3.23429		7.74964	4.39016		7.74964	4.39016		7.74964	4.39016		7.74964	4.39016
59		7.7942	4.41757		7.5334	4.15557		7.3076	3.92607		7.1168	3.72907		6.961	3.56457		6.6878	3.23157		7.7942	4.41757		7.5334	4.15557		7.3076	3.92607		7.1168	3.72907		6.961	3.56457		6.6878	3.23157		7.73131	4.37705		7.73131	4.37705		7.73131	4.37705		7.73131	4.37705
60		7.79201	4.41486		7.53121	4.15286		7.30541	3.92336		7.11461	3.72636		6.95881	3.56186		6.68561	3.22886		7.79201	4.41486		7.53121	4.15286		7.30541	3.92336		7.11461	3.72636		6.95881	3.56186		6.68561	3.22886		7.70743	4.36035		7.70743	4.36035		7.70743	4.36035		7.70743	4.36035
61		7.79048	4.41257		7.52968	4.15057		7.30388	3.92107		7.11308	3.72407		6.95728	3.55957		6.68408	3.22657		7.79048	4.41257		7.52968	4.15057		7.30388	3.92107		7.11308	3.72407		6.95728	3.55957		6.68408	3.22657		7.79048	4.41257		7.52968	4.15057		7.30388	3.92107		7.11308	3.72407
62		7.78829	4.40986		7.52749	4.14786		7.30169	3.91836		7.11089	3.72136		6.95509	3.55686		6.68189	3.22386		7.78829	4.40986		7.52749	4.14786		7.30169	3.91836		7.11089	3.72136		6.95509	3.55686		6.68189	3.22386		7.78829	4.40986		7.52749	4.14786		7.30169	3.91836		7.11089	3.72136
63		7.78676	4.40757		7.52596	4.14557		7.30016	3.91607		7.10936	3.71907		6.95356	3.55457		6.68036	3.22157		7.78676	4.40757		7.52596	4.14557		7.30016	3.91607		7.10936	3.71907		6.95356	3.55457		6.68036	3.22157		7.78676	4.40757		7.52596	4.14557		7.30016	3.91607		7.10936	3.71907
64		7.78522	4.40529		7.52442	4.14329		7.29862	3.91379		7.10782	3.71679		6.95202	3.55229		6.67882	3.21929		7.78522	4.40529		7.52442	4.14329		7.29862	3.91379		7.10782	3.71679		6.95202	3.55229		6.67882	3.21929		7.78522	4.40529		7.52442	4.14329		7.29862	3.91379		7.10782	3.71679
65		7.78435	4.40344		7.52355	4.14144		7.29775	3.91194		7.10695	3.71494		6.95115	3.55044		6.67795	3.21744		7.78435	4.40344		7.52355	4.14144		7.29775	3.91194		7.10695	3.71494		6.95115	3.55044		6.67795	3.21744		7.78435	4.40344		7.52355	4.14144		7.29775	3.91194		7.10695	3.71494
66		7.7828	4.40116		7.522	4.13916		7.2962	3.90966		7.1054	3.71266		6.9496	3.54816		6.6764	3.21516		7.7828	4.40116		7.522	4.13916		7.2962	3.90966		7.1054	3.71266		6.9496	3.54816		6.6764	3.21516		7.7828	4.40116		7.522	4.13916		7.2962	3.90966		7.1054	3.71266
67		7.78192	4.39931		7.52112	4.13731		7.29532	3.90781		7.10452	3.71081		6.94872	3.54631		6.67552	3.21331		7.78192	4.39931		7.52112	4.13731		7.29532	3.90781		7.10452	3.71081		6.94872	3.54631		6.67552	3.21331		7.78192	4.39931		7.52112	4.13731		7.29532	3.90781		7.10452	3.71081
68		7.78103	4.39746		7.52023	4.13546		7.29443	3.90596		7.10363	3.70896		6.94783	3.54446		6.67463	3.21146		7.78103	4.39746		7.52023	4.13546		7.29443	3.90596		7.10363	3.70896		6.94783	3.54446		6.67463	3.21146		7.78103	4.39746		7.52023	4.13546		7.29443	3.90596		7.10363	3.70896
69		7.7808	4.39605		7.52	4.13405		7.2942	3.90455		7.1034	3.70755		6.9476	3.54305		6.6744	3.21005		7.7808	4.39605		7.52	4.13405		7.2942	3.90455		7.1034	3.70755		6.9476	3.54305		6.6744	3.21005		7.7808	4.39605		7.52	4.13405		7.2942	3.90455		7.1034	3.70755
70		7.77991	4.3942		7.51911	4.1322		7.29331	3.9027		7.10251	3.7057		6.94671	3.5412		6.67351	3.2082		7.77991	4.3942		7.51911	4.1322		7.29331	3.9027		7.10251	3.7057		6.94671	3.5412		6.67351	3.2082		7.77991	4.3942		7.51911	4.1322		7.29331	3.9027		7.10251	3.7057
71		7.77968	4.39279		7.51888	4.13079		7.29308	3.90129		7.10228	3.70429		6.94648	3.53979		6.67328	3.20679		7.77968	4.39279		7.51888	4.13079		7.29308	3.90129		7.10228	3.70429		6.94648	3.53979		6.67328	3.20679		7.77968	4.39279		7.51888	4.13079		7.29308	3.90129		7.10228	3.70429
72		7.77944	4.39137		7.51864	4.12937		7.29284	3.89987		7.10204	3.70287		6.94624	3.53837		6.67304	3.20537		7.77944	4.39137		7.51864	4.12937		7.29284	3.89987		7.10204	3.70287		6.94624	3.53837		6.67304	3.20537		7.77944	4.39137		7.51864	4.12937		7.29284	3.89987		7.10204	3.70287
73		7.77919	4.38996		7.51839	4.12796		7.29259	3.89846		7.10179	3.70146		6.94599	3.53696		6.67279	3.20396		7.77919	4.38996		7.51839	4.12796		7.29259	3.89846		7.10179	3.70146		6.94599	3.53696		6.67279	3.20396		7.77919	4.38996		7.51839	4.12796		7.29259	3.89846		7.10179	3.70146
74		7.77961	4.38898		7.51881	4.12698		7.29301	3.89748		7.10221	3.70048		6.94641	3.53598		6.67321	3.20298		7.77961	4.38898		7.51881	4.12698		7.29301	3.89748		7.10221	3.70048		6.94641	3.53598		6.67321	3.20298		7.77961	4.38898		7.51881	4.12698		7.29301	3.89748		7.10221	3.70048
75		7.77936	4.38757		7.51856	4.12557		7.29276	3.89607		7.10196	3.69907		6.94616	3.53457		6.67296	3.20157		7.77936	4.38757		7.51856	4.12557		7.29276	3.89607		7.10196	3.69907		6.94616	3.53457		6.67296	3.20157		7.77936	4.38757		7.51856	4.12557		7.29276	3.89607		7.10196	3.69907
76		7.77976	4.38658		7.51896	4.12458		7.29316	3.89508		7.10236	3.69808		6.94656	3.53358		6.67336	3.20058		7.77976	4.38658		7.51896	4.12458		7.29316	3.89508		7.10236	3.69808		6.94656	3.53358		6.67336	3.20058		7.77976	4.38658		7.51896	4.12458		7.29316	3.89508		7.10236	3.69808
77		7.78017	4.3856		7.51937	4.1236		7.29357	3.8941		7.10277	3.6971		6.94697	3.5326		6.67377	3.1996		7.78017	4.3856		7.51937	4.1236		7.29357	3.8941		7.10277	3.6971		6.94697	3.5326		6.67377	3.1996		7.78017	4.3856		7.51937	4.1236		7.29357	3.8941		7.10277	3.6971
78		7.78122	4.38505		7.52042	4.12305		7.29462	3.89355		7.10382	3.69655		6.94802	3.53205		6.67482	3.19905		7.78122	4.38505		7.52042	4.12305		7.29462	3.89355		7.10382	3.69655		6.94802	3.53205		6.67482	3.19905		7.78122	4.38505		7.52042	4.12305		7.29462	3.89355		7.10382	3.69655
79		7.78162	4.38407		7.52082	4.12207		7.29502	3.89257		7.10422	3.69557		6.94842	3.53107		6.67522	3.19807		7.78162	4.38407		7.52082	4.12207		7.29502	3.89257		7.10422	3.69557		6.94842	3.53107		6.67522	3.19807		7.78162	4.38407		7.52082	4.12207		7.29502	3.89257		7.10422	3.69557
80		7.78267	4.38352		7.52187	4.12152		7.29607	3.89202		7.10527	3.69502		6.94947	3.53052		6.67627	3.19752		7.78267	4.38352		7.52187	4.12152		7.29607	3.89202		7.10527	3.69502		6.94947	3.53052		6.67627	3.19752		7.78267	4.38352		7.52187	4.12152		7.29607	3.89202		7.10527	3.69502
81		7.79993	4.38924		7.53913	4.12724		7.31333	3.89774		7.12253	3.70074		6.96673	3.53624		6.69353	3.20324		7.79993	4.38924		7.53913	4.12724		7.31333	3.89774		7.12253	3.70074		6.96673	3.53624		6.69353	3.20324		7.79993	4.38924		7.53913	4.12724		7.31333	3.89774		7.12253	3.70074
82		7.80099	4.38871		7.54019	4.12671		7.31439	3.89721		7.12359	3.70021		6.96779	3.53571		6.69459	3.20271		7.80099	4.38871		7.54019	4.12671		7.31439	3.89721		7.12359	3.70021		6.96779	3.53571		6.69459	3.20271		7.80099	4.38871		7.54019	4.12671		7.31439	3.89721		7.12359	3.70021
83		7.80205	4.38817		7.54125	4.12617		7.31545	3.89667		7.12465	3.69967		6.96885	3.53517		6.69565	3.20217		7.80205	4.38817		7.54125	4.12617		7.31545	3.89667		7.12465	3.69967		6.96885	3.53517		6.69565	3.20217		7.80205	4.38817		7.54125	4.12617		7.31545	3.89667		7.12465	3.69967
84		7.8031	4.38764		7.5423	4.12564		7.3165	3.89614		7.1257	3.69914		6.9699	3.53464		6.6967	3.20164		7.8031	4.38764		7.5423	4.12564		7.3165	3.89614		7.1257	3.69914		6.9699	3.53464		6.6967	3.20164		7.8031	4.38764		7.5423	4.12564		7.3165	3.89614		7.1257	3.69914
85		7.8048	4.38753		7.544	4.12553		7.3182	3.89603		7.1274	3.69903		6.9716	3.53453		6.6984	3.20153		7.8048	4.38753		7.544	4.12553		7.3182	3.89603		7.1274	3.69903		6.9716	3.53453		6.6984	3.20153		7.8048	4.38753		7.544	4.12553		7.3182	3.89603		7.1274	3.69903
86		7.80649	4.38742		7.54569	4.12542		7.31989	3.89592		7.12909	3.69892		6.97329	3.53442		6.70009	3.20142		7.80649	4.38742		7.54569	4.12542		7.31989	3.89592		7.12909	3.69892		6.97329	3.53442		6.70009	3.20142		7.80649	4.38742		7.54569	4.12542		7.31989	3.89592		7.12909	3.69892
87		7.80818	4.38731		7.54738	4.12531		7.32158	3.89581		7.13078	3.69881		6.97498	3.53431		6.70178	3.20131		7.80818	4.38731		7.54738	4.12531		7.32158	3.89581		7.13078	3.69881		6.97498	3.53431		6.70178	3.20131		7.80818	4.38731		7.54738	4.12531		7.32158	3.89581		7.13078	3.69881
88		7.80987	4.3872		7.54907	4.1252		7.32327	3.8957		7.13247	3.6987		6.97667	3.5342		6.70347	3.2012		7.80987	4.3872		7.54907	4.1252		7.32327	3.8957		7.13247	3.6987		6.97667	3.5342		6.70347	3.2012		7.80987	4.3872		7.54907	4.1252		7.32327	3.8957		7.13247	3.6987
89		7.81155	4.38709		7.55075	4.12509		7.32495	3.89559		7.13415	3.69859		6.97835	3.53409		6.70515	3.20109		7.81155	4.38709		7.55075	4.12509		7.32495	3.89559		7.13415	3.69859		6.97835	3.53409		6.70515	3.20109		7.81155	4.38709		7.55075	4.12509		7.32495	3.89559		7.13415	3.69859
90		7.81322	4.38698		7.55242	4.12498		7.32662	3.89548		7.13582	3.69848		6.98002	3.53398		6.70682	3.20098		7.81322	4.38698		7.55242	4.12498		7.32662	3.89548		7.13582	3.69848		6.98002	3.53398		6.70682	3.20098		7.81322	4.38698		7.55242	4.12498		7.32662	3.89548		7.13582	3.69848
91		7.81554	4.3873		7.55474	4.1253		7.32894	3.8958		7.13814	3.6988		6.98234	3.5343		6.70914	3.2013		7.81554	4.3873		7.55474	4.1253		7.32894	3.8958		7.13814	3.6988		6.98234	3.5343		6.70914	3.2013		7.81554	4.3873		7.55474	4.1253		7.32894	3.8958		7.13814	3.6988
92		7.81721	4.38718		7.55641	4.12518		7.33061	3.89568		7.13981	3.69868		6.98401	3.53418		6.71081	3.20118		7.81721	4.38718		7.55641	4.12518		7.33061	3.89568		7.13981	3.69868		6.98401	3.53418		6.71081	3.20118		7.81721	4.38718		7.55641	4.12518		7.33061	3.89568		7.13981	3.69868
93		7.81952	4.3875		7.55872	4.1255		7.33292	3.896		7.14212	3.699		6.98632	3.5345		6.71312	3.2015		7.81952	4.3875		7.55872	4.1255		7.33292	3.896		7.14212	3.699		6.98632	3.5345		6.71312	3.2015		7.81952	4.3875		7.55872	4.1255		7.33292	3.896		7.14212	3.699
94		7.82182	4.38781		7.56102	4.12581		7.33522	3.89631		7.14442	3.69931		6.98862	3.53481		6.71542	3.20181		7.82182	4.38781		7.56102	4.12581		7.33522	3.89631		7.14442	3.69931		6.98862	3.53481		6.71542	3.20181		7.82182	4.38781		7.56102	4.12581		7.33522	3.89631		7.14442	3.69931
95		7.82412	4.38812		7.56332	4.12612		7.33752	3.89662		7.14672	3.69962		6.99092	3.53512		6.71772	3.20212		7.82412	4.38812		7.56332	4.12612		7.33752	3.89662		7.14672	3.69962		6.99092	3.53512		6.71772	3.20212		7.82412	4.38812		7.56332	4.12612		7.33752	3.89662		7.14672	3.69962
96		7.82706	4.38885		7.56626	4.12685		7.34046	3.89735		7.14966	3.70035		6.99386	3.53585		6.72066	3.20285		7.82706	4.38885		7.56626	4.12685		7.34046	3.89735		7.14966	3.70035		6.99386	3.53585		6.72066	3.20285		7.82706	4.38885		7.56626	4.12685		7.34046	3.89735		7.14966	3.70035
97		7.82935	4.38916		7.56855	4.12716		7.34275	3.89766		7.15195	3.70066		6.99615	3.53616		6.72295	3.20316		7.82935	4.38916		7.56855	4.12716		7.34275	3.89766		7.15195	3.70066		6.99615	3.53616		6.72295	3.20316		7.82935	4.38916		7.56855	4.12716		7.34275	3.89766		7.15195	3.70066
98		7.83228	4.38989		7.57148	4.12789		7.34568	3.89839		7.15488	3.70139		6.99908	3.53689		6.72588	3.20389		7.83228	4.38989		7.57148	4.12789		7.34568	3.89839		7.15488	3.70139		6.99908	3.53689		6.72588	3.20389		7.83228	4.38989		7.57148	4.12789		7.34568	3.89839		7.15488	3.70139
99		7.83456	4.3902		7.57376	4.1282		7.34796	3.8987		7.15716	3.7017		7.00136	3.5372		6.72816	3.2042		7.83456	4.3902		7.57376	4.1282		7.34796	3.8987		7.15716	3.7017		7.00136	3.5372		6.72816	3.2042		7.83456	4.3902		7.57376	4.1282		7.34796	3.8987		7.15716	3.7017
100		7.83748	4.39093		7.57668	4.12893		7.35088	3.89943		7.16008	3.70243		7.00428	3.53793		6.73108	3.20493		7.83748	4.39093		7.57668	4.12893		7.35088	3.89943		7.16008	3.70243		7.00428	3.53793		6.73108	3.20493		7.83748	4.39093		7.57668	4.12893		7.35088	3.89943		7.16008	3.70243
101		7.84039	4.39166		7.57959	4.12966		7.35379	3.90016		7.16299	3.70316		7.00719	3.53866		6.73399	3.20566		7.84039	4.39166		7.57959	4.12966		7.35379	3.90016		7.16299	3.70316		7.00719	3.53866		6.73399	3.20566		7.84039	4.39166		7.57959	4.12966		7.35379	3.90016		7.16299	3.70316
102		7.8433	4.39238		7.5825	4.13038		7.3567	3.90088		7.1659	3.70388		7.0101	3.53938		6.7369	3.20638		7.8433	4.39238		7.5825	4.13038		7.3567	3.90088		7.1659	3.70388		7.0101	3.53938		6.7369	3.20638		7.8433	4.39238		7.5825	4.13038		7.3567	3.90088		7.1659	3.70388
103		7.8462	4.39311		7.5854	4.13111		7.3596	3.90161		7.1688	3.70461		7.013	3.54011		6.7398	3.20711		7.8462	4.39311		7.5854	4.13111		7.3596	3.90161		7.1688	3.70461		7.013	3.54011		6.7398	3.20711		7.8462	4.39311		7.5854	4.13111		7.3596	3.90161		7.1688	3.70461
104		7.84909	4.39383		7.58829	4.13183		7.36249	3.90233		7.17169	3.70533		7.01589	3.54083		6.74269	3.20783		7.84909	4.39383		7.58829	4.13183		7.36249	3.90233		7.17169	3.70533		7.01589	3.54083		6.74269	3.20783		7.84909	4.39383		7.58829	4.13183		7.36249	3.90233		7.17169	3.70533
105		7.85198	4.39455		7.59118	4.13255		7.36538	3.90305		7.17458	3.70605		7.01878	3.54155		6.74558	3.20855		7.85198	4.39455		7.59118	4.13255		7.36538	3.90305		7.17458	3.70605		7.01878	3.54155		6.74558	3.20855		7.85198	4.39455		7.59118	4.13255		7.36538	3.90305		7.17458	3.70605
106		7.85551	4.3957		7.59471	4.1337		7.36891	3.9042		7.17811	3.7072		7.02231	3.5427		6.74911	3.2097		7.85551	4.3957		7.59471	4.1337		7.36891	3.9042		7.17811	3.7072		7.02231	3.5427		6.74911	3.2097		7.85551	4.3957		7.59471	4.1337		7.36891	3.9042		7.17811	3.7072
107		7.85839	4.39642		7.59759	4.13442		7.37179	3.90492		7.18099	3.70792		7.02519	3.54342		6.75199	3.21042		7.85839	4.39642		7.59759	4.13442		7.37179	3.90492		7.18099	3.70792		7.02519	3.54342		6.75199	3.21042		7.85839	4.39642		7.59759	4.13442		7.37179	3.90492		7.18099	3.70792
108		7.86191	4.39756		7.60111	4.13556		7.37531	3.90606		7.18451	3.70906		7.02871	3.54456		6.75551	3.21156		7.86191	4.39756		7.60111	4.13556		7.37531	3.90606		7.18451	3.70906		7.02871	3.54456		6.75551	3.21156		7.86191	4.39756		7.60111	4.13556		7.37531	3.90606		7.18451	3.70906
109		7.86478	4.39828		7.60398	4.13628		7.37818	3.90678		7.18738	3.70978		7.03158	3.54528		6.75838	3.21228		7.86478	4.39828		7.60398	4.13628		7.37818	3.90678		7.18738	3.70978		7.03158	3.54528		6.75838	3.21228		7.86478	4.39828		7.60398	4.13628		7.37818	3.90678		7.18738	3.70978
110		7.86828	4.39942		7.60748	4.13742		7.38168	3.90792		7.19088	3.71092		7.03508	3.54642		6.76188	3.21342		7.86828	4.39942		7.60748	4.13742		7.38168	3.90792		7.19088	3.71092		7.03508	3.54642		6.76188	3.21342		7.86828	4.39942		7.60748	4.13742		7.38168	3.90792		7.19088	3.71092
111		7.87178	4.40056		7.61098	4.13856		7.38518	3.90906		7.19438	3.71206		7.03858	3.54756		6.76538	3.21456		7.87178	4.40056		7.61098	4.13856		7.38518	3.90906		7.19438	3.71206		7.03858	3.54756		6.76538	3.21456		7.87178	4.40056		7.61098	4.13856		7.38518	3.90906		7.19438	3.71206
112		7.87528	4.4017		7.61448	4.1397		7.38868	3.9102		7.19788	3.7132		7.04208	3.5487		6.76888	3.2157		7.87528	4.4017		7.61448	4.1397		7.38868	3.9102		7.19788	3.7132		7.04208	3.5487		6.76888	3.2157		7.87528	4.4017		7.61448	4.1397		7.38868	3.9102		7.19788	3.7132
113		7.87876	4.40283		7.61796	4.14083		7.39216	3.91133		7.20136	3.71433		7.04556	3.54983		6.77236	3.21683		7.87876	4.40283		7.61796	4.14083		7.39216	3.91133		7.20136	3.71433		7.04556	3.54983		6.77236	3.21683		7.87876	4.40283		7.61796	4.14083		7.39216	3.91133		7.20136	3.71433
114		7.88225	4.40396		7.62145	4.14196		7.39565	3.91246		7.20485	3.71546		7.04905	3.55096		6.77585	3.21796		7.88225	4.40396		7.62145	4.14196		7.39565	3.91246		7.20485	3.71546		7.04905	3.55096		6.77585	3.21796		7.88225	4.40396		7.62145	4.14196		7.39565	3.91246		7.20485	3.71546
115		7.88572	4.4051		7.62492	4.1431		7.39912	3.9136		7.20832	3.7166		7.05252	3.5521		6.77932	3.2191		7.88572	4.4051		7.62492	4.1431		7.39912	3.9136		7.20832	3.7166		7.05252	3.5521		6.77932	3.2191		7.88572	4.4051		7.62492	4.1431		7.39912	3.9136		7.20832	3.7166
116		7.88919	4.40623		7.62839	4.14423		7.40259	3.91473		7.21179	3.71773		7.05599	3.55323		6.78279	3.22023		7.88919	4.40623		7.62839	4.14423		7.40259	3.91473		7.21179	3.71773		7.05599	3.55323		6.78279	3.22023		7.88919	4.40623		7.62839	4.14423		7.40259	3.91473		7.21179	3.71773
117		7.89266	4.40736		7.63186	4.14536		7.40606	3.91586		7.21526	3.71886		7.05946	3.55436		6.78626	3.22136		7.89266	4.40736		7.63186	4.14536		7.40606	3.91586		7.21526	3.71886		7.05946	3.55436		6.78626	3.22136		7.89266	4.40736		7.63186	4.14536		7.40606	3.91586		7.21526	3.71886
118		7.89612	4.40848		7.63532	4.14648		7.40952	3.91698		7.21872	3.71998		7.06292	3.55548		6.78972	3.22248		7.89612	4.40848		7.63532	4.14648		7.40952	3.91698		7.21872	3.71998		7.06292	3.55548		6.78972	3.22248		7.89612	4.40848		7.63532	4.14648		7.40952	3.91698		7.21872	3.71998
119		7.90021	4.41003		7.63941	4.14803		7.41361	3.91853		7.22281	3.72153		7.06701	3.55703		6.79381	3.22403		7.90021	4.41003		7.63941	4.14803		7.41361	3.91853		7.22281	3.72153		7.06701	3.55703		6.79381	3.22403		7.90021	4.41003		7.63941	4.14803		7.41361	3.91853		7.22281	3.72153
120		7.90366	4.41116		7.64286	4.14916		7.41706	3.91966		7.22626	3.72266		7.07046	3.55816		6.79726	3.22516		7.90366	4.41116		7.64286	4.14916		7.41706	3.91966		7.22626	3.72266		7.07046	3.55816		6.79726	3.22516		7.90366	4.41116		7.64286	4.14916		7.41706	3.91966		7.22626	3.72266
CSKK		LAB at 60 km																		LAB at 65 km																		LAB at 70 km
		no melt			melt 0.5%			melt 1%			melt 1.5%			melt 2%			melt 4%			no melt			melt 0.5%			melt 1%			melt 1.5%			melt 2%			melt 4%			no melt			melt 0.5%			melt 1%			melt 1.5%
Depth		Vp	Vs		Vp	Vs		Vp	Vs		Vp	Vs		Vp	Vs		Vp	Vs		Vp	Vs		Vp	Vs		Vp	Vs		Vp	Vs		Vp	Vs		Vp	Vs		Vp	Vs		Vp	Vs		Vp	Vs		Vp	Vs
1		4	2.31		4	2.31		4	2.31		4	2.31		4	2.31		4	2.31		4	2.31		4	2.31		4	2.31		4	2.31		4	2.31		4	2.31		4	2.31		4	2.31		4	2.31		4	2.31
2		5.99915	3.60971		5.99915	3.60971		5.99915	3.60971		5.99915	3.60971		5.99915	3.60971		5.99915	3.60971		5.99915	3.60971		5.99915	3.60971		5.99915	3.60971		5.99915	3.60971		5.99915	3.60971		5.99915	3.60971		5.99915	3.60971		5.99915	3.60971		5.99915	3.60971		5.99915	3.60971
3		6.01211	3.61417		6.01211	3.61417		6.01211	3.61417		6.01211	3.61417		6.01211	3.61417		6.01211	3.61417		6.01211	3.61417		6.01211	3.61417		6.01211	3.61417		6.01211	3.61417		6.01211	3.61417		6.01211	3.61417		6.01211	3.61417		6.01211	3.61417		6.01211	3.61417		6.01211	3.61417
4		6.02508	3.61863		6.02508	3.61863		6.02508	3.61863		6.02508	3.61863		6.02508	3.61863		6.02508	3.61863		6.02508	3.61863		6.02508	3.61863		6.02508	3.61863		6.02508	3.61863		6.02508	3.61863		6.02508	3.61863		6.02508	3.61863		6.02508	3.61863		6.02508	3.61863		6.02508	3.61863
5		6.03804	3.62309		6.03804	3.62309		6.03804	3.62309		6.03804	3.62309		6.03804	3.62309		6.03804	3.62309		6.03804	3.62309		6.03804	3.62309		6.03804	3.62309		6.03804	3.62309		6.03804	3.62309		6.03804	3.62309		6.03804	3.62309		6.03804	3.62309		6.03804	3.62309		6.03804	3.62309
6		6.05811	3.62946		6.05811	3.62946		6.05811	3.62946		6.05811	3.62946		6.05811	3.62946		6.05811	3.62946		6.05811	3.62946		6.05811	3.62946		6.05811	3.62946		6.05811	3.62946		6.05811	3.62946		6.05811	3.62946		6.05811	3.62946		6.05811	3.62946		6.05811	3.62946		6.05811	3.62946
7		6.07818	3.63583		6.07818	3.63583		6.07818	3.63583		6.07818	3.63583		6.07818	3.63583		6.07818	3.63583		6.07818	3.63583		6.07818	3.63583		6.07818	3.63583		6.07818	3.63583		6.07818	3.63583		6.07818	3.63583		6.07818	3.63583		6.07818	3.63583		6.07818	3.63583		6.07818	3.63583
8		6.09825	3.6422		6.09825	3.6422		6.09825	3.6422		6.09825	3.6422		6.09825	3.6422		6.09825	3.6422		6.09825	3.6422		6.09825	3.6422		6.09825	3.6422		6.09825	3.6422		6.09825	3.6422		6.09825	3.6422		6.09825	3.6422		6.09825	3.6422		6.09825	3.6422		6.09825	3.6422
9		6.11833	3.64857		6.11833	3.64857		6.11833	3.64857		6.11833	3.64857		6.11833	3.64857		6.11833	3.64857		6.11833	3.64857		6.11833	3.64857		6.11833	3.64857		6.11833	3.64857		6.11833	3.64857		6.11833	3.64857		6.11833	3.64857		6.11833	3.64857		6.11833	3.64857		6.11833	3.64857
10		6.16918	3.6632		6.16918	3.6632		6.16918	3.6632		6.16918	3.6632		6.16918	3.6632		6.16918	3.6632		6.16918	3.6632		6.16918	3.6632		6.16918	3.6632		6.16918	3.6632		6.16918	3.6632		6.16918	3.6632		6.16918	3.6632		6.16918	3.6632		6.16918	3.6632		6.16918	3.6632
11		6.22003	3.67784		6.22003	3.67784		6.22003	3.67784		6.22003	3.67784		6.22003	3.67784		6.22003	3.67784		6.22003	3.67784		6.22003	3.67784		6.22003	3.67784		6.22003	3.67784		6.22003	3.67784		6.22003	3.67784		6.22003	3.67784		6.22003	3.67784		6.22003	3.67784		6.22003	3.67784
12		6.27088	3.69247		6.27088	3.69247		6.27088	3.69247		6.27088	3.69247		6.27088	3.69247		6.27088	3.69247		6.27088	3.69247		6.27088	3.69247		6.27088	3.69247		6.27088	3.69247		6.27088	3.69247		6.27088	3.69247		6.27088	3.69247		6.27088	3.69247		6.27088	3.69247		6.27088	3.69247
13		6.32173	3.70711		6.32173	3.70711		6.32173	3.70711		6.32173	3.70711		6.32173	3.70711		6.32173	3.70711		6.32173	3.70711		6.32173	3.70711		6.32173	3.70711		6.32173	3.70711		6.32173	3.70711		6.32173	3.70711		6.32173	3.70711		6.32173	3.70711		6.32173	3.70711		6.32173	3.70711
14		6.37258	3.72174		6.37258	3.72174		6.37258	3.72174		6.37258	3.72174		6.37258	3.72174		6.37258	3.72174		6.37258	3.72174		6.37258	3.72174		6.37258	3.72174		6.37258	3.72174		6.37258	3.72174		6.37258	3.72174		6.37258	3.72174		6.37258	3.72174		6.37258	3.72174		6.37258	3.72174
15		6.45486	3.74422		6.45486	3.74422		6.45486	3.74422		6.45486	3.74422		6.45486	3.74422		6.45486	3.74422		6.45486	3.74422		6.45486	3.74422		6.45486	3.74422		6.45486	3.74422		6.45486	3.74422		6.45486	3.74422		6.45486	3.74422		6.45486	3.74422		6.45486	3.74422		6.45486	3.74422
16		6.53713	3.7667		6.53713	3.7667		6.53713	3.7667		6.53713	3.7667		6.53713	3.7667		6.53713	3.7667		6.53713	3.7667		6.53713	3.7667		6.53713	3.7667		6.53713	3.7667		6.53713	3.7667		6.53713	3.7667		6.53713	3.7667		6.53713	3.7667		6.53713	3.7667		6.53713	3.7667
17		6.61941	3.78918		6.61941	3.78918		6.61941	3.78918		6.61941	3.78918		6.61941	3.78918		6.61941	3.78918		6.61941	3.78918		6.61941	3.78918		6.61941	3.78918		6.61941	3.78918		6.61941	3.78918		6.61941	3.78918		6.61941	3.78918		6.61941	3.78918		6.61941	3.78918		6.61941	3.78918
18		6.70169	3.81167		6.70169	3.81167		6.70169	3.81167		6.70169	3.81167		6.70169	3.81167		6.70169	3.81167		6.70169	3.81167		6.70169	3.81167		6.70169	3.81167		6.70169	3.81167		6.70169	3.81167		6.70169	3.81167		6.70169	3.81167		6.70169	3.81167		6.70169	3.81167		6.70169	3.81167
19		6.78397	3.83415		6.78397	3.83415		6.78397	3.83415		6.78397	3.83415		6.78397	3.83415		6.78397	3.83415		6.78397	3.83415		6.78397	3.83415		6.78397	3.83415		6.78397	3.83415		6.78397	3.83415		6.78397	3.83415		6.78397	3.83415		6.78397	3.83415		6.78397	3.83415		6.78397	3.83415
20		6.89464	3.88691		6.89464	3.88691		6.89464	3.88691		6.89464	3.88691		6.89464	3.88691		6.89464	3.88691		6.89464	3.88691		6.89464	3.88691		6.89464	3.88691		6.89464	3.88691		6.89464	3.88691		6.89464	3.88691		6.89464	3.88691		6.89464	3.88691		6.89464	3.88691		6.89464	3.88691
21		7.00531	3.93966		7.00531	3.93966		7.00531	3.93966		7.00531	3.93966		7.00531	3.93966		7.00531	3.93966		7.00531	3.93966		7.00531	3.93966		7.00531	3.93966		7.00531	3.93966		7.00531	3.93966		7.00531	3.93966		7.00531	3.93966		7.00531	3.93966		7.00531	3.93966		7.00531	3.93966
22		7.11599	3.99242		7.11599	3.99242		7.11599	3.99242		7.11599	3.99242		7.11599	3.99242		7.11599	3.99242		7.11599	3.99242		7.11599	3.99242		7.11599	3.99242		7.11599	3.99242		7.11599	3.99242		7.11599	3.99242		7.11599	3.99242		7.11599	3.99242		7.11599	3.99242		7.11599	3.99242
23		7.22666	4.04518		7.22666	4.04518		7.22666	4.04518		7.22666	4.04518		7.22666	4.04518		7.22666	4.04518		7.22666	4.04518		7.22666	4.04518		7.22666	4.04518		7.22666	4.04518		7.22666	4.04518		7.22666	4.04518		7.22666	4.04518		7.22666	4.04518		7.22666	4.04518		7.22666	4.04518
24		7.33733	4.09793		7.33733	4.09793		7.33733	4.09793		7.33733	4.09793		7.33733	4.09793		7.33733	4.09793		7.33733	4.09793		7.33733	4.09793		7.33733	4.09793		7.33733	4.09793		7.33733	4.09793		7.33733	4.09793		7.33733	4.09793		7.33733	4.09793		7.33733	4.09793		7.33733	4.09793
25		7.42164	4.1485		7.42164	4.1485		7.42164	4.1485		7.42164	4.1485		7.42164	4.1485		7.42164	4.1485		7.42164	4.1485		7.42164	4.1485		7.42164	4.1485		7.42164	4.1485		7.42164	4.1485		7.42164	4.1485		7.42164	4.1485		7.42164	4.1485		7.42164	4.1485		7.42164	4.1485
26		7.50594	4.19906		7.50594	4.19906		7.50594	4.19906		7.50594	4.19906		7.50594	4.19906		7.50594	4.19906		7.50594	4.19906		7.50594	4.19906		7.50594	4.19906		7.50594	4.19906		7.50594	4.19906		7.50594	4.19906		7.50594	4.19906		7.50594	4.19906		7.50594	4.19906		7.50594	4.19906
27		7.59024	4.24962		7.59024	4.24962		7.59024	4.24962		7.59024	4.24962		7.59024	4.24962		7.59024	4.24962		7.59024	4.24962		7.59024	4.24962		7.59024	4.24962		7.59024	4.24962		7.59024	4.24962		7.59024	4.24962		7.59024	4.24962		7.59024	4.24962		7.59024	4.24962		7.59024	4.24962
28		7.67454	4.30019		7.67454	4.30019		7.67454	4.30019		7.67454	4.30019		7.67454	4.30019		7.67454	4.30019		7.67454	4.30019		7.67454	4.30019		7.67454	4.30019		7.67454	4.30019		7.67454	4.30019		7.67454	4.30019		7.67454	4.30019		7.67454	4.30019		7.67454	4.30019		7.67454	4.30019
29		8.12085	4.67408		8.12085	4.67408		8.12085	4.67408		8.12085	4.67408		8.12085	4.67408		8.12085	4.67408		8.12085	4.67408		8.12085	4.67408		8.12085	4.67408		8.12085	4.67408		8.12085	4.67408		8.12085	4.67408		8.12085	4.67408		8.12085	4.67408		8.12085	4.67408		8.12085	4.67408
30		8.11805	4.67085		8.11805	4.67085		8.11805	4.67085		8.11805	4.67085		8.11805	4.67085		8.11805	4.67085		8.11805	4.67085		8.11805	4.67085		8.11805	4.67085		8.11805	4.67085		8.11805	4.67085		8.11805	4.67085		8.11805	4.67085		8.11805	4.67085		8.11805	4.67085		8.11805	4.67085
31		8.11521	4.66761		8.11521	4.66761		8.11521	4.66761		8.11521	4.66761		8.11521	4.66761		8.11521	4.66761		8.11521	4.66761		8.11521	4.66761		8.11521	4.66761		8.11521	4.66761		8.11521	4.66761		8.11521	4.66761		8.11521	4.66761		8.11521	4.66761		8.11521	4.66761		8.11521	4.66761
32		8.11235	4.66436		8.11235	4.66436		8.11235	4.66436		8.11235	4.66436		8.11235	4.66436		8.11235	4.66436		8.11235	4.66436		8.11235	4.66436		8.11235	4.66436		8.11235	4.66436		8.11235	4.66436		8.11235	4.66436		8.11235	4.66436		8.11235	4.66436		8.11235	4.66436		8.11235	4.66436
33		8.11006	4.66149		8.11006	4.66149		8.11006	4.66149		8.11006	4.66149		8.11006	4.66149		8.11006	4.66149		8.11006	4.66149		8.11006	4.66149		8.11006	4.66149		8.11006	4.66149		8.11006	4.66149		8.11006	4.66149		8.11006	4.66149		8.11006	4.66149		8.11006	4.66149		8.11006	4.66149
34		8.10775	4.65861		8.10775	4.65861		8.10775	4.65861		8.10775	4.65861		8.10775	4.65861		8.10775	4.65861		8.10775	4.65861		8.10775	4.65861		8.10775	4.65861		8.10775	4.65861		8.10775	4.65861		8.10775	4.65861		8.10775	4.65861		8.10775	4.65861		8.10775	4.65861		8.10775	4.65861
35		8.10481	4.65531		8.10481	4.65531		8.10481	4.65531		8.10481	4.65531		8.10481	4.65531		8.10481	4.65531		8.10481	4.65531		8.10481	4.65531		8.10481	4.65531		8.10481	4.65531		8.10481	4.65531		8.10481	4.65531		8.10481	4.65531		8.10481	4.65531		8.10481	4.65531		8.10481	4.65531
36		8.10245	4.65241		8.10245	4.65241		8.10245	4.65241		8.10245	4.65241		8.10245	4.65241		8.10245	4.65241		8.10245	4.65241		8.10245	4.65241		8.10245	4.65241		8.10245	4.65241		8.10245	4.65241		8.10245	4.65241		8.10245	4.65241		8.10245	4.65241		8.10245	4.65241		8.10245	4.65241
37		8.10007	4.6495		8.10007	4.6495		8.10007	4.6495		8.10007	4.6495		8.10007	4.6495		8.10007	4.6495		8.10007	4.6495		8.10007	4.6495		8.10007	4.6495		8.10007	4.6495		8.10007	4.6495		8.10007	4.6495		8.10007	4.6495		8.10007	4.6495		8.10007	4.6495		8.10007	4.6495
38		8.09768	4.64657		8.09768	4.64657		8.09768	4.64657		8.09768	4.64657		8.09768	4.64657		8.09768	4.64657		8.09768	4.64657		8.09768	4.64657		8.09768	4.64657		8.09768	4.64657		8.09768	4.64657		8.09768	4.64657		8.09768	4.64657		8.09768	4.64657		8.09768	4.64657		8.09768	4.64657
39		8.09526	4.64364		8.09526	4.64364		8.09526	4.64364		8.09526	4.64364		8.09526	4.64364		8.09526	4.64364		8.09526	4.64364		8.09526	4.64364		8.09526	4.64364		8.09526	4.64364		8.09526	4.64364		8.09526	4.64364		8.09526	4.64364		8.09526	4.64364		8.09526	4.64364		8.09526	4.64364
40		8.09283	4.64069		8.09283	4.64069		8.09283	4.64069		8.09283	4.64069		8.09283	4.64069		8.09283	4.64069		8.09283	4.64069		8.09283	4.64069		8.09283	4.64069		8.09283	4.64069		8.09283	4.64069		8.09283	4.64069		8.09283	4.64069		8.09283	4.64069		8.09283	4.64069		8.09283	4.64069
41		8.09038	4.63774		8.09038	4.63774		8.09038	4.63774		8.09038	4.63774		8.09038	4.63774		8.09038	4.63774		8.09038	4.63774		8.09038	4.63774		8.09038	4.63774		8.09038	4.63774		8.09038	4.63774		8.09038	4.63774		8.09038	4.63774		8.09038	4.63774		8.09038	4.63774		8.09038	4.63774
42		8.08791	4.63478		8.08791	4.63478		8.08791	4.63478		8.08791	4.63478		8.08791	4.63478		8.08791	4.63478		8.08791	4.63478		8.08791	4.63478		8.08791	4.63478		8.08791	4.63478		8.08791	4.63478		8.08791	4.63478		8.08791	4.63478		8.08791	4.63478		8.08791	4.63478		8.08791	4.63478
43		8.08604	4.63222		8.08604	4.63222		8.08604	4.63222		8.08604	4.63222		8.08604	4.63222		8.08604	4.63222		8.08604	4.63222		8.08604	4.63222		8.08604	4.63222		8.08604	4.63222		8.08604	4.63222		8.08604	4.63222		8.08604	4.63222		8.08604	4.63222		8.08604	4.63222		8.08604	4.63222
44		8.08353	4.62924		8.08353	4.62924		8.08353	4.62924		8.08353	4.62924		8.08353	4.62924		8.08353	4.62924		8.08353	4.62924		8.08353	4.62924		8.08353	4.62924		8.08353	4.62924		8.08353	4.62924		8.08353	4.62924		8.08353	4.62924		8.08353	4.62924		8.08353	4.62924		8.08353	4.62924
45		8.08101	4.62625		8.08101	4.62625		8.08101	4.62625		8.08101	4.62625		8.08101	4.62625		8.08101	4.62625		8.08101	4.62625		8.08101	4.62625		8.08101	4.62625		8.08101	4.62625		8.08101	4.62625		8.08101	4.62625		8.08101	4.62625		8.08101	4.62625		8.08101	4.62625		8.08101	4.62625
46		8.0791	4.62367		8.0791	4.62367		8.0791	4.62367		8.0791	4.62367		8.0791	4.62367		8.0791	4.62367		8.0791	4.62367		8.0791	4.62367		8.0791	4.62367		8.0791	4.62367		8.0791	4.62367		8.0791	4.62367		8.0791	4.62367		8.0791	4.62367		8.0791	4.62367		8.0791	4.62367
47		8.07655	4.62067		8.07655	4.62067		8.07655	4.62067		8.07655	4.62067		8.07655	4.62067		8.07655	4.62067		8.07655	4.62067		8.07655	4.62067		8.07655	4.62067		8.07655	4.62067		8.07655	4.62067		8.07655	4.62067		8.07655	4.62067		8.07655	4.62067		8.07655	4.62067		8.07655	4.62067
48		8.07399	4.61766		8.07399	4.61766		8.07399	4.61766		8.07399	4.61766		8.07399	4.61766		8.07399	4.61766		8.07399	4.61766		8.07399	4.61766		8.07399	4.61766		8.07399	4.61766		8.07399	4.61766		8.07399	4.61766		8.07399	4.61766		8.07399	4.61766		8.07399	4.61766		8.07399	4.61766
49		8.07203	4.61506		8.07203	4.61506		8.07203	4.61506		8.07203	4.61506		8.07203	4.61506		8.07203	4.61506		8.07203	4.61506		8.07203	4.61506		8.07203	4.61506		8.07203	4.61506		8.07203	4.61506		8.07203	4.61506		8.07203	4.61506		8.07203	4.61506		8.07203	4.61506		8.07203	4.61506
50		8.06944	4.61204		8.06944	4.61204		8.06944	4.61204		8.06944	4.61204		8.06944	4.61204		8.06944	4.61204		8.06944	4.61204		8.06944	4.61204		8.06944	4.61204		8.06944	4.61204		8.06944	4.61204		8.06944	4.61204		8.06944	4.61204		8.06944	4.61204		8.06944	4.61204		8.06944	4.61204
51		8.06578	4.60834		8.06578	4.60834		8.06578	4.60834		8.06578	4.60834		8.06578	4.60834		8.06578	4.60834		8.06746	4.60943		8.06746	4.60943		8.06746	4.60943		8.06746	4.60943		8.06746	4.60943		8.06746	4.60943		8.06746	4.60943		8.06746	4.60943		8.06746	4.60943		8.06746	4.60943
52		8.06089	4.60385		8.06089	4.60385		8.06089	4.60385		8.06089	4.60385		8.06089	4.60385		8.06089	4.60385		8.06485	4.60639		8.06485	4.60639		8.06485	4.60639		8.06485	4.60639		8.06485	4.60639		8.06485	4.60639		8.06485	4.60639		8.06485	4.60639		8.06485	4.60639		8.06485	4.60639
53		8.05584	4.59926		8.05584	4.59926		8.05584	4.59926		8.05584	4.59926		8.05584	4.59926		8.05584	4.59926		8.06284	4.60377		8.06284	4.60377		8.06284	4.60377		8.06284	4.60377		8.06284	4.60377		8.06284	4.60377		8.06284	4.60377		8.06284	4.60377		8.06284	4.60377		8.06284	4.60377
54		8.04909	4.59357		8.04909	4.59357		8.04909	4.59357		8.04909	4.59357		8.04909	4.59357		8.04909	4.59357		8.0602	4.60072		8.0602	4.60072		8.0602	4.60072		8.0602	4.60072		8.0602	4.60072		8.0602	4.60072		8.0602	4.60072		8.0602	4.60072		8.0602	4.60072		8.0602	4.60072
55		8.04153	4.58738		8.04153	4.58738		8.04153	4.58738		8.04153	4.58738		8.04153	4.58738		8.04153	4.58738		8.05818	4.59809		8.05818	4.59809		8.05818	4.59809		8.05818	4.59809		8.05818	4.59809		8.05818	4.59809		8.05818	4.59809		8.05818	4.59809		8.05818	4.59809		8.05818	4.59809
56		8.03204	4.57995		8.03204	4.57995		8.03204	4.57995		8.03204	4.57995		8.03204	4.57995		8.03204	4.57995		8.05446	4.59437		8.05446	4.59437		8.05446	4.59437		8.05446	4.59437		8.05446	4.59437		8.05446	4.59437		8.05614	4.59545		8.05614	4.59545		8.05614	4.59545		8.05614	4.59545
57		8.01935	4.57044		8.01935	4.57044		8.01935	4.57044		8.01935	4.57044		8.01935	4.57044		8.01935	4.57044		8.04953	4.58986		8.04953	4.58986		8.04953	4.58986		8.04953	4.58986		8.04953	4.58986		8.04953	4.58986		8.05346	4.59238		8.05346	4.59238		8.05346	4.59238		8.05346	4.59238
58		8.00381	4.55912		8.00381	4.55912		8.00381	4.55912		8.00381	4.55912		8.00381	4.55912		8.00381	4.55912		8.04444	4.58526		8.04444	4.58526		8.04444	4.58526		8.04444	4.58526		8.04444	4.58526		8.04444	4.58526		8.05141	4.58974		8.05141	4.58974		8.05141	4.58974		8.05141	4.58974
59		7.98301	4.54441		7.98301	4.54441		7.98301	4.54441		7.98301	4.54441		7.98301	4.54441		7.98301	4.54441		8.03765	4.57956		8.03765	4.57956		8.03765	4.57956		8.03765	4.57956		8.03765	4.57956		8.03765	4.57956		8.04871	4.58666		8.04871	4.58666		8.04871	4.58666		8.04871	4.58666
60		7.95661	4.5261		7.95661	4.5261		7.95661	4.5261		7.95661	4.5261		7.95661	4.5261		7.95661	4.5261		8.03008	4.57337		8.03008	4.57337		8.03008	4.57337		8.03008	4.57337		8.03008	4.57337		8.03008	4.57337		8.04663	4.58401		8.04663	4.58401		8.04663	4.58401		8.04663	4.58401
61		8.04874	4.58408		7.78794	4.32208		7.56214	4.09258		7.37134	3.89558		7.21554	3.73108		6.94234	3.39808		8.01995	4.56553		8.01995	4.56553		8.01995	4.56553		8.01995	4.56553		8.01995	4.56553		8.01995	4.56553		8.04224	4.57985		8.04224	4.57985		8.04224	4.57985		8.04224	4.57985
62		8.04664	4.58141		7.78584	4.31941		7.56004	4.08991		7.36924	3.89291		7.21344	3.72841		6.94024	3.39541		8.00789	4.55646		8.00789	4.55646		8.00789	4.55646		8.00789	4.55646		8.00789	4.55646		8.00789	4.55646		8.03791	4.57575		8.03791	4.57575		8.03791	4.57575		8.03791	4.57575
63		8.0439	4.57831		7.7831	4.31631		7.5573	4.08681		7.3665	3.88981		7.2107	3.72531		6.9375	3.39231		7.99176	4.54477		7.99176	4.54477		7.99176	4.54477		7.99176	4.54477		7.99176	4.54477		7.99176	4.54477		8.03215	4.57072		8.03215	4.57072		8.03215	4.57072		8.03215	4.57072
64		8.04178	4.57563		7.78098	4.31363		7.55518	4.08413		7.36438	3.88713		7.20858	3.72263		6.93538	3.38963		7.97164	4.53052		7.97164	4.53052		7.97164	4.53052		7.97164	4.53052		7.97164	4.53052		7.97164	4.53052		8.02597	4.56544		8.02597	4.56544		8.02597	4.56544		8.02597	4.56544
65		8.03901	4.57253		7.77821	4.31053		7.55241	4.08103		7.36161	3.88403		7.20581	3.71953		6.93261	3.38653		7.94472	4.51188		7.94472	4.51188		7.94472	4.51188		7.94472	4.51188		7.94472	4.51188		7.94472	4.51188		8.01775	4.55883		8.01775	4.55883		8.01775	4.55883		8.01775	4.55883
66		8.03687	4.56984		7.77607	4.30784		7.55027	4.07834		7.35947	3.88134		7.20367	3.71684		6.93047	3.38384		8.03687	4.56984		7.77607	4.30784		7.55027	4.07834		7.35947	3.88134		7.20367	3.71684		6.93047	3.38384		8.00825	4.55142		8.00825	4.55142		8.00825	4.55142		8.00825	4.55142
67		8.03409	4.56673		7.77329	4.30473		7.54749	4.07523		7.35669	3.87823		7.20089	3.71373		6.92769	3.38073		8.03409	4.56673		7.77329	4.30473		7.54749	4.07523		7.35669	3.87823		7.20089	3.71373		6.92769	3.38073		7.99558	4.54196		7.99558	4.54196		7.99558	4.54196		7.99558	4.54196
68		8.03194	4.56404		7.77114	4.30204		7.54534	4.07254		7.35454	3.87554		7.19874	3.71104		6.92554	3.37804		8.03194	4.56404		7.77114	4.30204		7.54534	4.07254		7.35454	3.87554		7.19874	3.71104		6.92554	3.37804		7.98011	4.53072		7.98011	4.53072		7.98011	4.53072		7.98011	4.53072
69		8.02914	4.56092		7.76834	4.29892		7.54254	4.06942		7.35174	3.87242		7.19594	3.70792		6.92274	3.37492		8.02914	4.56092		7.76834	4.29892		7.54254	4.06942		7.35174	3.87242		7.19594	3.70792		6.92274	3.37492		7.95943	4.51612		7.95943	4.51612		7.95943	4.51612		7.95943	4.51612
70		8.02633	4.5578		7.76553	4.2958		7.53973	4.0663		7.34893	3.8693		7.19313	3.7048		6.91993	3.3718		8.02633	4.5578		7.76553	4.2958		7.53973	4.0663		7.34893	3.8693		7.19313	3.7048		6.91993	3.3718		7.93261	4.49758		7.93261	4.49758		7.93261	4.49758		7.93261	4.49758
71		8.02415	4.5551		7.76335	4.2931		7.53755	4.0636		7.34675	3.8666		7.19095	3.7021		6.91775	3.3691		8.02415	4.5551		7.76335	4.2931		7.53755	4.0636		7.34675	3.8666		7.19095	3.7021		6.91775	3.3691		8.02415	4.5551		7.76335	4.2931		7.53755	4.0636		7.34675	3.8666
72		8.02132	4.55197		7.76052	4.28997		7.53472	4.06047		7.34392	3.86347		7.18812	3.69897		6.91492	3.36597		8.02132	4.55197		7.76052	4.28997		7.53472	4.06047		7.34392	3.86347		7.18812	3.69897		6.91492	3.36597		8.02132	4.55197		7.76052	4.28997		7.53472	4.06047		7.34392	3.86347
73		8.01849	4.54884		7.75769	4.28684		7.53189	4.05734		7.34109	3.86034		7.18529	3.69584		6.91209	3.36284		8.01849	4.54884		7.75769	4.28684		7.53189	4.05734		7.34109	3.86034		7.18529	3.69584		6.91209	3.36284		8.01849	4.54884		7.75769	4.28684		7.53189	4.05734		7.34109	3.86034
74		8.01629	4.54613		7.75549	4.28413		7.52969	4.05463		7.33889	3.85763		7.18309	3.69313		6.90989	3.36013		8.01629	4.54613		7.75549	4.28413		7.52969	4.05463		7.33889	3.85763		7.18309	3.69313		6.90989	3.36013		8.01629	4.54613		7.75549	4.28413		7.52969	4.05463		7.33889	3.85763
75		8.01345	4.54299		7.75265	4.28099		7.52685	4.05149		7.33605	3.85449		7.18025	3.68999		6.90705	3.35699		8.01345	4.54299		7.75265	4.28099		7.52685	4.05149		7.33605	3.85449		7.18025	3.68999		6.90705	3.35699		8.01345	4.54299		7.75265	4.28099		7.52685	4.05149		7.33605	3.85449
76		8.01059	4.53985		7.74979	4.27785		7.52399	4.04835		7.33319	3.85135		7.17739	3.68685		6.90419	3.35385		8.01059	4.53985		7.74979	4.27785		7.52399	4.04835		7.33319	3.85135		7.17739	3.68685		6.90419	3.35385		8.01059	4.53985		7.74979	4.27785		7.52399	4.04835		7.33319	3.85135
77		8.00773	4.53671		7.74693	4.27471		7.52113	4.04521		7.33033	3.84821		7.17453	3.68371		6.90133	3.35071		8.00773	4.53671		7.74693	4.27471		7.52113	4.04521		7.33033	3.84821		7.17453	3.68371		6.90133	3.35071		8.00773	4.53671		7.74693	4.27471		7.52113	4.04521		7.33033	3.84821
78		8.00486	4.53356		7.74406	4.27156		7.51826	4.04206		7.32746	3.84506		7.17166	3.68056		6.89846	3.34756		8.00486	4.53356		7.74406	4.27156		7.51826	4.04206		7.32746	3.84506		7.17166	3.68056		6.89846	3.34756		8.00486	4.53356		7.74406	4.27156		7.51826	4.04206		7.32746	3.84506
79		8.00263	4.53084		7.74183	4.26884		7.51603	4.03934		7.32523	3.84234		7.16943	3.67784		6.89623	3.34484		8.00263	4.53084		7.74183	4.26884		7.51603	4.03934		7.32523	3.84234		7.16943	3.67784		6.89623	3.34484		8.00263	4.53084		7.74183	4.26884		7.51603	4.03934		7.32523	3.84234
80		7.99975	4.52769		7.73895	4.26569		7.51315	4.03619		7.32235	3.83919		7.16655	3.67469		6.89335	3.34169		7.99975	4.52769		7.73895	4.26569		7.51315	4.03619		7.32235	3.83919		7.16655	3.67469		6.89335	3.34169		7.99975	4.52769		7.73895	4.26569		7.51315	4.03619		7.32235	3.83919
81		8.01054	4.52922		7.74974	4.26722		7.52394	4.03772		7.33314	3.84072		7.17734	3.67622		6.90414	3.34322		8.01054	4.52922		7.74974	4.26722		7.52394	4.03772		7.33314	3.84072		7.17734	3.67622		6.90414	3.34322		8.01054	4.52922		7.74974	4.26722		7.52394	4.03772		7.33314	3.84072
82		8.00772	4.52612		7.74692	4.26412		7.52112	4.03462		7.33032	3.83762		7.17452	3.67312		6.90132	3.34012		8.00772	4.52612		7.74692	4.26412		7.52112	4.03462		7.33032	3.83762		7.17452	3.67312		6.90132	3.34012		8.00772	4.52612		7.74692	4.26412		7.52112	4.03462		7.33032	3.83762
83		8.00489	4.52301		7.74409	4.26101		7.51829	4.03151		7.32749	3.83451		7.17169	3.67001		6.89849	3.33701		8.00489	4.52301		7.74409	4.26101		7.51829	4.03151		7.32749	3.83451		7.17169	3.67001		6.89849	3.33701		8.00489	4.52301		7.74409	4.26101		7.51829	4.03151		7.32749	3.83451
84		8.00205	4.5199		7.74125	4.2579		7.51545	4.0284		7.32465	3.8314		7.16885	3.6669		6.89565	3.3339		8.00205	4.5199		7.74125	4.2579		7.51545	4.0284		7.32465	3.8314		7.16885	3.6669		6.89565	3.3339		8.00205	4.5199		7.74125	4.2579		7.51545	4.0284		7.32465	3.8314
85		7.99921	4.51679		7.73841	4.25479		7.51261	4.02529		7.32181	3.82829		7.16601	3.66379		6.89281	3.33079		7.99921	4.51679		7.73841	4.25479		7.51261	4.02529		7.32181	3.82829		7.16601	3.66379		6.89281	3.33079		7.99921	4.51679		7.73841	4.25479		7.51261	4.02529		7.32181	3.82829
86		7.99636	4.51368		7.73556	4.25168		7.50976	4.02218		7.31896	3.82518		7.16316	3.66068		6.88996	3.32768		7.99636	4.51368		7.73556	4.25168		7.50976	4.02218		7.31896	3.82518		7.16316	3.66068		6.88996	3.32768		7.99636	4.51368		7.73556	4.25168		7.50976	4.02218		7.31896	3.82518
87		7.99351	4.51057		7.73271	4.24857		7.50691	4.01907		7.31611	3.82207		7.16031	3.65757		6.88711	3.32457		7.99351	4.51057		7.73271	4.24857		7.50691	4.01907		7.31611	3.82207		7.16031	3.65757		6.88711	3.32457		7.99351	4.51057		7.73271	4.24857		7.50691	4.01907		7.31611	3.82207
88		7.99065	4.50745		7.72985	4.24545		7.50405	4.01595		7.31325	3.81895		7.15745	3.65445		6.88425	3.32145		7.99065	4.50745		7.72985	4.24545		7.50405	4.01595		7.31325	3.81895		7.15745	3.65445		6.88425	3.32145		7.99065	4.50745		7.72985	4.24545		7.50405	4.01595		7.31325	3.81895
89		7.98778	4.50434		7.72698	4.24234		7.50118	4.01284		7.31038	3.81584		7.15458	3.65134		6.88138	3.31834		7.98778	4.50434		7.72698	4.24234		7.50118	4.01284		7.31038	3.81584		7.15458	3.65134		6.88138	3.31834		7.98778	4.50434		7.72698	4.24234		7.50118	4.01284		7.31038	3.81584
90		7.98491	4.50122		7.72411	4.23922		7.49831	4.00972		7.30751	3.81272		7.15171	3.64822		6.87851	3.31522		7.98491	4.50122		7.72411	4.23922		7.49831	4.00972		7.30751	3.81272		7.15171	3.64822		6.87851	3.31522		7.98491	4.50122		7.72411	4.23922		7.49831	4.00972		7.30751	3.81272
91		7.98204	4.4981		7.72124	4.2361		7.49544	4.0066		7.30464	3.8096		7.14884	3.6451		6.87564	3.3121		7.98204	4.4981		7.72124	4.2361		7.49544	4.0066		7.30464	3.8096		7.14884	3.6451		6.87564	3.3121		7.98204	4.4981		7.72124	4.2361		7.49544	4.0066		7.30464	3.8096
92		7.97916	4.49498		7.71836	4.23298		7.49256	4.00348		7.30176	3.80648		7.14596	3.64198		6.87276	3.30898		7.97916	4.49498		7.71836	4.23298		7.49256	4.00348		7.30176	3.80648		7.14596	3.64198		6.87276	3.30898		7.97916	4.49498		7.71836	4.23298		7.49256	4.00348		7.30176	3.80648
93		7.97628	4.49186		7.71548	4.22986		7.48968	4.00036		7.29888	3.80336		7.14308	3.63886		6.86988	3.30586		7.97628	4.49186		7.71548	4.22986		7.48968	4.00036		7.29888	3.80336		7.14308	3.63886		6.86988	3.30586		7.97628	4.49186		7.71548	4.22986		7.48968	4.00036		7.29888	3.80336
94		7.97339	4.48874		7.71259	4.22674		7.48679	3.99724		7.29599	3.80024		7.14019	3.63574		6.86699	3.30274		7.97339	4.48874		7.71259	4.22674		7.48679	3.99724		7.29599	3.80024		7.14019	3.63574		6.86699	3.30274		7.97339	4.48874		7.71259	4.22674		7.48679	3.99724		7.29599	3.80024
95		7.96986	4.48519		7.70906	4.22319		7.48326	3.99369		7.29246	3.79669		7.13666	3.63219		6.86346	3.29919		7.96986	4.48519		7.70906	4.22319		7.48326	3.99369		7.29246	3.79669		7.13666	3.63219		6.86346	3.29919		7.96986	4.48519		7.70906	4.22319		7.48326	3.99369		7.29246	3.79669
96		7.96697	4.48207		7.70617	4.22007		7.48037	3.99057		7.28957	3.79357		7.13377	3.62907		6.86057	3.29607		7.96697	4.48207		7.70617	4.22007		7.48037	3.99057		7.28957	3.79357		7.13377	3.62907		6.86057	3.29607		7.96697	4.48207		7.70617	4.22007		7.48037	3.99057		7.28957	3.79357
97		7.96407	4.47895		7.70327	4.21695		7.47747	3.98745		7.28667	3.79045		7.13087	3.62595		6.85767	3.29295		7.96407	4.47895		7.70327	4.21695		7.47747	3.98745		7.28667	3.79045		7.13087	3.62595		6.85767	3.29295		7.96407	4.47895		7.70327	4.21695		7.47747	3.98745		7.28667	3.79045
98		7.96117	4.47582		7.70037	4.21382		7.47457	3.98432		7.28377	3.78732		7.12797	3.62282		6.85477	3.28982		7.96117	4.47582		7.70037	4.21382		7.47457	3.98432		7.28377	3.78732		7.12797	3.62282		6.85477	3.28982		7.96117	4.47582		7.70037	4.21382		7.47457	3.98432		7.28377	3.78732
99		7.95826	4.4727		7.69746	4.2107		7.47166	3.9812		7.28086	3.7842		7.12506	3.6197		6.85186	3.2867		7.95826	4.4727		7.69746	4.2107		7.47166	3.9812		7.28086	3.7842		7.12506	3.6197		6.85186	3.2867		7.95826	4.4727		7.69746	4.2107		7.47166	3.9812		7.28086	3.7842
100		7.95535	4.46958		7.69455	4.20758		7.46875	3.97808		7.27795	3.78108		7.12215	3.61658		6.84895	3.28358		7.95535	4.46958		7.69455	4.20758		7.46875	3.97808		7.27795	3.78108		7.12215	3.61658		6.84895	3.28358		7.95535	4.46958		7.69455	4.20758		7.46875	3.97808		7.27795	3.78108
101		7.95244	4.46645		7.69164	4.20445		7.46584	3.97495		7.27504	3.77795		7.11924	3.61345		6.84604	3.28045		7.95244	4.46645		7.69164	4.20445		7.46584	3.97495		7.27504	3.77795		7.11924	3.61345		6.84604	3.28045		7.95244	4.46645		7.69164	4.20445		7.46584	3.97495		7.27504	3.77795
102		7.94952	4.46333		7.68872	4.20133		7.46292	3.97183		7.27212	3.77483		7.11632	3.61033		6.84312	3.27733		7.94952	4.46333		7.68872	4.20133		7.46292	3.97183		7.27212	3.77483		7.11632	3.61033		6.84312	3.27733		7.94952	4.46333		7.68872	4.20133		7.46292	3.97183		7.27212	3.77483
103		7.9466	4.4602		7.6858	4.1982		7.46	3.9687		7.2692	3.7717		7.1134	3.6072		6.8402	3.2742		7.9466	4.4602		7.6858	4.1982		7.46	3.9687		7.2692	3.7717		7.1134	3.6072		6.8402	3.2742		7.9466	4.4602		7.6858	4.1982		7.46	3.9687		7.2692	3.7717
104		7.94368	4.45708		7.68288	4.19508		7.45708	3.96558		7.26628	3.76858		7.11048	3.60408		6.83728	3.27108		7.94368	4.45708		7.68288	4.19508		7.45708	3.96558		7.26628	3.76858		7.11048	3.60408		6.83728	3.27108		7.94368	4.45708		7.68288	4.19508		7.45708	3.96558		7.26628	3.76858
105		7.94075	4.45395		7.67995	4.19195		7.45415	3.96245		7.26335	3.76545		7.10755	3.60095		6.83435	3.26795		7.94075	4.45395		7.67995	4.19195		7.45415	3.96245		7.26335	3.76545		7.10755	3.60095		6.83435	3.26795		7.94075	4.45395		7.67995	4.19195		7.45415	3.96245		7.26335	3.76545
106		7.93847	4.45125		7.67767	4.18925		7.45187	3.95975		7.26107	3.76275		7.10527	3.59825		6.83207	3.26525		7.93847	4.45125		7.67767	4.18925		7.45187	3.95975		7.26107	3.76275		7.10527	3.59825		6.83207	3.26525		7.93847	4.45125		7.67767	4.18925		7.45187	3.95975		7.26107	3.76275
107		7.93553	4.44813		7.67473	4.18613		7.44893	3.95663		7.25813	3.75963		7.10233	3.59513		6.82913	3.26213		7.93553	4.44813		7.67473	4.18613		7.44893	3.95663		7.25813	3.75963		7.10233	3.59513		6.82913	3.26213		7.93553	4.44813		7.67473	4.18613		7.44893	3.95663		7.25813	3.75963
108		7.9326	4.445		7.6718	4.183		7.446	3.9535		7.2552	3.7565		7.0994	3.592		6.8262	3.259		7.9326	4.445		7.6718	4.183		7.446	3.9535		7.2552	3.7565		7.0994	3.592		6.8262	3.259		7.9326	4.445		7.6718	4.183		7.446	3.9535		7.2552	3.7565
109		7.92966	4.44188		7.66886	4.17988		7.44306	3.95038		7.25226	3.75338		7.09646	3.58888		6.82326	3.25588		7.92966	4.44188		7.66886	4.17988		7.44306	3.95038		7.25226	3.75338		7.09646	3.58888		6.82326	3.25588		7.92966	4.44188		7.66886	4.17988		7.44306	3.95038		7.25226	3.75338
110		7.92736	4.43918		7.66656	4.17718		7.44076	3.94768		7.24996	3.75068		7.09416	3.58618		6.82096	3.25318		7.92736	4.43918		7.66656	4.17718		7.44076	3.94768		7.24996	3.75068		7.09416	3.58618		6.82096	3.25318		7.92736	4.43918		7.66656	4.17718		7.44076	3.94768		7.24996	3.75068
111		7.92442	4.43606		7.66362	4.17406		7.43782	3.94456		7.24702	3.74756		7.09122	3.58306		6.81802	3.25006		7.92442	4.43606		7.66362	4.17406		7.43782	3.94456		7.24702	3.74756		7.09122	3.58306		6.81802	3.25006		7.92442	4.43606		7.66362	4.17406		7.43782	3.94456		7.24702	3.74756
112		7.92212	4.43336		7.66132	4.17136		7.43552	3.94186		7.24472	3.74486		7.08892	3.58036		6.81572	3.24736		7.92212	4.43336		7.66132	4.17136		7.43552	3.94186		7.24472	3.74486		7.08892	3.58036		6.81572	3.24736		7.92212	4.43336		7.66132	4.17136		7.43552	3.94186		7.24472	3.74486
113		7.91917	4.43024		7.65837	4.16824		7.43257	3.93874		7.24177	3.74174		7.08597	3.57724		6.81277	3.24424		7.91917	4.43024		7.65837	4.16824		7.43257	3.93874		7.24177	3.74174		7.08597	3.57724		6.81277	3.24424		7.91917	4.43024		7.65837	4.16824		7.43257	3.93874		7.24177	3.74174
114		7.91687	4.42754		7.65607	4.16554		7.43027	3.93604		7.23947	3.73904		7.08367	3.57454		6.81047	3.24154		7.91687	4.42754		7.65607	4.16554		7.43027	3.93604		7.23947	3.73904		7.08367	3.57454		6.81047	3.24154		7.91687	4.42754		7.65607	4.16554		7.43027	3.93604		7.23947	3.73904
115		7.91456	4.42484		7.65376	4.16284		7.42796	3.93334		7.23716	3.73634		7.08136	3.57184		6.80816	3.23884		7.91456	4.42484		7.65376	4.16284		7.42796	3.93334		7.23716	3.73634		7.08136	3.57184		6.80816	3.23884		7.91456	4.42484		7.65376	4.16284		7.42796	3.93334		7.23716	3.73634
116		7.9116	4.42172		7.6508	4.15972		7.425	3.93022		7.2342	3.73322		7.0784	3.56872		6.8052	3.23572		7.9116	4.42172		7.6508	4.15972		7.425	3.93022		7.2342	3.73322		7.0784	3.56872		6.8052	3.23572		7.9116	4.42172		7.6508	4.15972		7.425	3.93022		7.2342	3.73322
117		7.90929	4.41902		7.64849	4.15702		7.42269	3.92752		7.23189	3.73052		7.07609	3.56602		6.80289	3.23302		7.90929	4.41902		7.64849	4.15702		7.42269	3.92752		7.23189	3.73052		7.07609	3.56602		6.80289	3.23302		7.90929	4.41902		7.64849	4.15702		7.42269	3.92752		7.23189	3.73052
118		7.90697	4.41633		7.64617	4.15433		7.42037	3.92483		7.22957	3.72783		7.07377	3.56333		6.80057	3.23033		7.90697	4.41633		7.64617	4.15433		7.42037	3.92483		7.22957	3.72783		7.07377	3.56333		6.80057	3.23033		7.90697	4.41633		7.64617	4.15433		7.42037	3.92483		7.22957	3.72783
119		7.90465	4.41363		7.64385	4.15163		7.41805	3.92213		7.22725	3.72513		7.07145	3.56063		6.79825	3.22763		7.90465	4.41363		7.64385	4.15163		7.41805	3.92213		7.22725	3.72513		7.07145	3.56063		6.79825	3.22763		7.90465	4.41363		7.64385	4.15163		7.41805	3.92213		7.22725	3.72513
120		7.90297	4.41136		7.64217	4.14936		7.41637	3.91986		7.22557	3.72286		7.06977	3.55836		6.79657	3.22536		7.90297	4.41136		7.64217	4.14936		7.41637	3.91986		7.22557	3.72286		7.06977	3.55836		6.79657	3.22536		7.90297	4.41136		7.64217	4.14936		7.41637	3.91986		7.22557	3.72286
KOVH		LAB at 50 km																		LAB at 55 km																		LAB at 60 km
		no melt			melt 0.5%			melt 1%			melt 1.5%			melt 2%			melt 4%			no melt			melt 0.5%			melt 1%			melt 1.5%			melt 2%			melt 4%			no melt			melt 0.5%			melt 1%			melt 1.5%
Depth		Vp	Vs		Vp	Vs		Vp	Vs		Vp	Vs		Vp	Vs		Vp	Vs		Vp	Vs		Vp	Vs		Vp	Vs		Vp	Vs		Vp	Vs		Vp	Vs		Vp	Vs		Vp	Vs		Vp	Vs		Vp	Vs
1		4.54677	2.71615		4.54677	2.71615		4.54677	2.71615		4.54677	2.71615		4.54677	2.71615		4.54677	2.71615		4.54677	2.71615		4.54677	2.71615		4.54677	2.71615		4.54677	2.71615		4.54677	2.71615		4.54677	2.71615		4.54677	2.71615		4.54677	2.71615		4.54677	2.71615		4.54677	2.71615
2		5.99353	3.6048		5.99353	3.6048		5.99353	3.6048		5.99353	3.6048		5.99353	3.6048		5.99353	3.6048		5.99353	3.6048		5.99353	3.6048		5.99353	3.6048		5.99353	3.6048		5.99353	3.6048		5.99353	3.6048		5.99353	3.6048		5.99353	3.6048		5.99353	3.6048		5.99353	3.6048
3		6.00324	3.60633		6.00324	3.60633		6.00324	3.60633		6.00324	3.60633		6.00324	3.60633		6.00324	3.60633		6.00324	3.60633		6.00324	3.60633		6.00324	3.60633		6.00324	3.60633		6.00324	3.60633		6.00324	3.60633		6.00324	3.60633		6.00324	3.60633		6.00324	3.60633		6.00324	3.60633
4		6.01295	3.60787		6.01295	3.60787		6.01295	3.60787		6.01295	3.60787		6.01295	3.60787		6.01295	3.60787		6.01295	3.60787		6.01295	3.60787		6.01295	3.60787		6.01295	3.60787		6.01295	3.60787		6.01295	3.60787		6.01295	3.60787		6.01295	3.60787		6.01295	3.60787		6.01295	3.60787
5		6.02265	3.60941		6.02265	3.60941		6.02265	3.60941		6.02265	3.60941		6.02265	3.60941		6.02265	3.60941		6.02265	3.60941		6.02265	3.60941		6.02265	3.60941		6.02265	3.60941		6.02265	3.60941		6.02265	3.60941		6.02265	3.60941		6.02265	3.60941		6.02265	3.60941		6.02265	3.60941
6		6.04524	3.61503		6.04524	3.61503		6.04524	3.61503		6.04524	3.61503		6.04524	3.61503		6.04524	3.61503		6.04524	3.61503		6.04524	3.61503		6.04524	3.61503		6.04524	3.61503		6.04524	3.61503		6.04524	3.61503		6.04524	3.61503		6.04524	3.61503		6.04524	3.61503		6.04524	3.61503
7		6.06783	3.62064		6.06783	3.62064		6.06783	3.62064		6.06783	3.62064		6.06783	3.62064		6.06783	3.62064		6.06783	3.62064		6.06783	3.62064		6.06783	3.62064		6.06783	3.62064		6.06783	3.62064		6.06783	3.62064		6.06783	3.62064		6.06783	3.62064		6.06783	3.62064		6.06783	3.62064
8		6.09041	3.62626		6.09041	3.62626		6.09041	3.62626		6.09041	3.62626		6.09041	3.62626		6.09041	3.62626		6.09041	3.62626		6.09041	3.62626		6.09041	3.62626		6.09041	3.62626		6.09041	3.62626		6.09041	3.62626		6.09041	3.62626		6.09041	3.62626		6.09041	3.62626		6.09041	3.62626
9		6.13693	3.63714		6.13693	3.63714		6.13693	3.63714		6.13693	3.63714		6.13693	3.63714		6.13693	3.63714		6.13693	3.63714		6.13693	3.63714		6.13693	3.63714		6.13693	3.63714		6.13693	3.63714		6.13693	3.63714		6.13693	3.63714		6.13693	3.63714		6.13693	3.63714		6.13693	3.63714
10		6.18345	3.64802		6.18345	3.64802		6.18345	3.64802		6.18345	3.64802		6.18345	3.64802		6.18345	3.64802		6.18345	3.64802		6.18345	3.64802		6.18345	3.64802		6.18345	3.64802		6.18345	3.64802		6.18345	3.64802		6.18345	3.64802		6.18345	3.64802		6.18345	3.64802		6.18345	3.64802
11		6.22997	3.6589		6.22997	3.6589		6.22997	3.6589		6.22997	3.6589		6.22997	3.6589		6.22997	3.6589		6.22997	3.6589		6.22997	3.6589		6.22997	3.6589		6.22997	3.6589		6.22997	3.6589		6.22997	3.6589		6.22997	3.6589		6.22997	3.6589		6.22997	3.6589		6.22997	3.6589
12		6.27649	3.66978		6.27649	3.66978		6.27649	3.66978		6.27649	3.66978		6.27649	3.66978		6.27649	3.66978		6.27649	3.66978		6.27649	3.66978		6.27649	3.66978		6.27649	3.66978		6.27649	3.66978		6.27649	3.66978		6.27649	3.66978		6.27649	3.66978		6.27649	3.66978		6.27649	3.66978
13		6.32301	3.68066		6.32301	3.68066		6.32301	3.68066		6.32301	3.68066		6.32301	3.68066		6.32301	3.68066		6.32301	3.68066		6.32301	3.68066		6.32301	3.68066		6.32301	3.68066		6.32301	3.68066		6.32301	3.68066		6.32301	3.68066		6.32301	3.68066		6.32301	3.68066		6.32301	3.68066
14		6.39939	3.69893		6.39939	3.69893		6.39939	3.69893		6.39939	3.69893		6.39939	3.69893		6.39939	3.69893		6.39939	3.69893		6.39939	3.69893		6.39939	3.69893		6.39939	3.69893		6.39939	3.69893		6.39939	3.69893		6.39939	3.69893		6.39939	3.69893		6.39939	3.69893		6.39939	3.69893
15		6.47577	3.7172		6.47577	3.7172		6.47577	3.7172		6.47577	3.7172		6.47577	3.7172		6.47577	3.7172		6.47577	3.7172		6.47577	3.7172		6.47577	3.7172		6.47577	3.7172		6.47577	3.7172		6.47577	3.7172		6.47577	3.7172		6.47577	3.7172		6.47577	3.7172		6.47577	3.7172
16		6.55215	3.73546		6.55215	3.73546		6.55215	3.73546		6.55215	3.73546		6.55215	3.73546		6.55215	3.73546		6.55215	3.73546		6.55215	3.73546		6.55215	3.73546		6.55215	3.73546		6.55215	3.73546		6.55215	3.73546		6.55215	3.73546		6.55215	3.73546		6.55215	3.73546		6.55215	3.73546
17		6.62853	3.75373		6.62853	3.75373		6.62853	3.75373		6.62853	3.75373		6.62853	3.75373		6.62853	3.75373		6.62853	3.75373		6.62853	3.75373		6.62853	3.75373		6.62853	3.75373		6.62853	3.75373		6.62853	3.75373		6.62853	3.75373		6.62853	3.75373		6.62853	3.75373		6.62853	3.75373
18		6.70491	3.772		6.70491	3.772		6.70491	3.772		6.70491	3.772		6.70491	3.772		6.70491	3.772		6.70491	3.772		6.70491	3.772		6.70491	3.772		6.70491	3.772		6.70491	3.772		6.70491	3.772		6.70491	3.772		6.70491	3.772		6.70491	3.772		6.70491	3.772
19		6.8365	3.83411		6.8365	3.83411		6.8365	3.83411		6.8365	3.83411		6.8365	3.83411		6.8365	3.83411		6.8365	3.83411		6.8365	3.83411		6.8365	3.83411		6.8365	3.83411		6.8365	3.83411		6.8365	3.83411		6.8365	3.83411		6.8365	3.83411		6.8365	3.83411		6.8365	3.83411
20		6.96809	3.89623		6.96809	3.89623		6.96809	3.89623		6.96809	3.89623		6.96809	3.89623		6.96809	3.89623		6.96809	3.89623		6.96809	3.89623		6.96809	3.89623		6.96809	3.89623		6.96809	3.89623		6.96809	3.89623		6.96809	3.89623		6.96809	3.89623		6.96809	3.89623		6.96809	3.89623
21		7.09968	3.95835		7.09968	3.95835		7.09968	3.95835		7.09968	3.95835		7.09968	3.95835		7.09968	3.95835		7.09968	3.95835		7.09968	3.95835		7.09968	3.95835		7.09968	3.95835		7.09968	3.95835		7.09968	3.95835		7.09968	3.95835		7.09968	3.95835		7.09968	3.95835		7.09968	3.95835
22		7.23127	4.02047		7.23127	4.02047		7.23127	4.02047		7.23127	4.02047		7.23127	4.02047		7.23127	4.02047		7.23127	4.02047		7.23127	4.02047		7.23127	4.02047		7.23127	4.02047		7.23127	4.02047		7.23127	4.02047		7.23127	4.02047		7.23127	4.02047		7.23127	4.02047		7.23127	4.02047
23		7.34011	4.08628		7.34011	4.08628		7.34011	4.08628		7.34011	4.08628		7.34011	4.08628		7.34011	4.08628		7.34011	4.08628		7.34011	4.08628		7.34011	4.08628		7.34011	4.08628		7.34011	4.08628		7.34011	4.08628		7.34011	4.08628		7.34011	4.08628		7.34011	4.08628		7.34011	4.08628
24		7.44896	4.15209		7.44896	4.15209		7.44896	4.15209		7.44896	4.15209		7.44896	4.15209		7.44896	4.15209		7.44896	4.15209		7.44896	4.15209		7.44896	4.15209		7.44896	4.15209		7.44896	4.15209		7.44896	4.15209		7.44896	4.15209		7.44896	4.15209		7.44896	4.15209		7.44896	4.15209
25		7.5578	4.2179		7.5578	4.2179		7.5578	4.2179		7.5578	4.2179		7.5578	4.2179		7.5578	4.2179		7.5578	4.2179		7.5578	4.2179		7.5578	4.2179		7.5578	4.2179		7.5578	4.2179		7.5578	4.2179		7.5578	4.2179		7.5578	4.2179		7.5578	4.2179		7.5578	4.2179
26		7.96451	4.57318		7.96451	4.57318		7.96451	4.57318		7.96451	4.57318		7.96451	4.57318		7.96451	4.57318		7.96451	4.57318		7.96451	4.57318		7.96451	4.57318		7.96451	4.57318		7.96451	4.57318		7.96451	4.57318		7.96451	4.57318		7.96451	4.57318		7.96451	4.57318		7.96451	4.57318
27		7.95618	4.56632		7.95618	4.56632		7.95618	4.56632		7.95618	4.56632		7.95618	4.56632		7.95618	4.56632		7.95618	4.56632		7.95618	4.56632		7.95618	4.56632		7.95618	4.56632		7.95618	4.56632		7.95618	4.56632		7.95618	4.56632		7.95618	4.56632		7.95618	4.56632		7.95618	4.56632
28		7.94782	4.55945		7.94782	4.55945		7.94782	4.55945		7.94782	4.55945		7.94782	4.55945		7.94782	4.55945		7.94782	4.55945		7.94782	4.55945		7.94782	4.55945		7.94782	4.55945		7.94782	4.55945		7.94782	4.55945		7.94782	4.55945		7.94782	4.55945		7.94782	4.55945		7.94782	4.55945
29		7.93941	4.55255		7.93941	4.55255		7.93941	4.55255		7.93941	4.55255		7.93941	4.55255		7.93941	4.55255		7.93941	4.55255		7.93941	4.55255		7.93941	4.55255		7.93941	4.55255		7.93941	4.55255		7.93941	4.55255		7.93941	4.55255		7.93941	4.55255		7.93941	4.55255		7.93941	4.55255
30		7.93162	4.54607		7.93162	4.54607		7.93162	4.54607		7.93162	4.54607		7.93162	4.54607		7.93162	4.54607		7.93162	4.54607		7.93162	4.54607		7.93162	4.54607		7.93162	4.54607		7.93162	4.54607		7.93162	4.54607		7.93162	4.54607		7.93162	4.54607		7.93162	4.54607		7.93162	4.54607
31		7.9238	4.53957		7.9238	4.53957		7.9238	4.53957		7.9238	4.53957		7.9238	4.53957		7.9238	4.53957		7.9238	4.53957		7.9238	4.53957		7.9238	4.53957		7.9238	4.53957		7.9238	4.53957		7.9238	4.53957		7.9238	4.53957		7.9238	4.53957		7.9238	4.53957		7.9238	4.53957
32		7.91661	4.53348		7.91661	4.53348		7.91661	4.53348		7.91661	4.53348		7.91661	4.53348		7.91661	4.53348		7.91661	4.53348		7.91661	4.53348		7.91661	4.53348		7.91661	4.53348		7.91661	4.53348		7.91661	4.53348		7.91661	4.53348		7.91661	4.53348		7.91661	4.53348		7.91661	4.53348
33		7.90938	4.52739		7.90938	4.52739		7.90938	4.52739		7.90938	4.52739		7.90938	4.52739		7.90938	4.52739		7.90938	4.52739		7.90938	4.52739		7.90938	4.52739		7.90938	4.52739		7.90938	4.52739		7.90938	4.52739		7.90938	4.52739		7.90938	4.52739		7.90938	4.52739		7.90938	4.52739
34		7.90214	4.52128		7.90214	4.52128		7.90214	4.52128		7.90214	4.52128		7.90214	4.52128		7.90214	4.52128		7.90214	4.52128		7.90214	4.52128		7.90214	4.52128		7.90214	4.52128		7.90214	4.52128		7.90214	4.52128		7.90214	4.52128		7.90214	4.52128		7.90214	4.52128		7.90214	4.52128
35		7.89553	4.51559		7.89553	4.51559		7.89553	4.51559		7.89553	4.51559		7.89553	4.51559		7.89553	4.51559		7.89553	4.51559		7.89553	4.51559		7.89553	4.51559		7.89553	4.51559		7.89553	4.51559		7.89553	4.51559		7.89553	4.51559		7.89553	4.51559		7.89553	4.51559		7.89553	4.51559
36		7.8889	4.5099		7.8889	4.5099		7.8889	4.5099		7.8889	4.5099		7.8889	4.5099		7.8889	4.5099		7.8889	4.5099		7.8889	4.5099		7.8889	4.5099		7.8889	4.5099		7.8889	4.5099		7.8889	4.5099		7.8889	4.5099		7.8889	4.5099		7.8889	4.5099		7.8889	4.5099
37		7.88226	4.50419		7.88226	4.50419		7.88226	4.50419		7.88226	4.50419		7.88226	4.50419		7.88226	4.50419		7.88226	4.50419		7.88226	4.50419		7.88226	4.50419		7.88226	4.50419		7.88226	4.50419		7.88226	4.50419		7.88226	4.50419		7.88226	4.50419		7.88226	4.50419		7.88226	4.50419
38		7.87626	4.49892		7.87626	4.49892		7.87626	4.49892		7.87626	4.49892		7.87626	4.49892		7.87626	4.49892		7.87626	4.49892		7.87626	4.49892		7.87626	4.49892		7.87626	4.49892		7.87626	4.49892		7.87626	4.49892		7.87626	4.49892		7.87626	4.49892		7.87626	4.49892		7.87626	4.49892
39		7.87024	4.49363		7.87024	4.49363		7.87024	4.49363		7.87024	4.49363		7.87024	4.49363		7.87024	4.49363		7.87024	4.49363		7.87024	4.49363		7.87024	4.49363		7.87024	4.49363		7.87024	4.49363		7.87024	4.49363		7.87024	4.49363		7.87024	4.49363		7.87024	4.49363		7.87024	4.49363
40		7.86421	4.48834		7.86421	4.48834		7.86421	4.48834		7.86421	4.48834		7.86421	4.48834		7.86421	4.48834		7.86421	4.48834		7.86421	4.48834		7.86421	4.48834		7.86421	4.48834		7.86421	4.48834		7.86421	4.48834		7.86421	4.48834		7.86421	4.48834		7.86421	4.48834		7.86421	4.48834
41		7.85729	4.48249		7.85729	4.48249		7.85729	4.48249		7.85729	4.48249		7.85729	4.48249		7.85729	4.48249		7.85883	4.48348		7.85883	4.48348		7.85883	4.48348		7.85883	4.48348		7.85883	4.48348		7.85883	4.48348		7.85883	4.48348		7.85883	4.48348		7.85883	4.48348		7.85883	4.48348
42		7.84983	4.47629		7.84983	4.47629		7.84983	4.47629		7.84983	4.47629		7.84983	4.47629		7.84983	4.47629		7.85344	4.47862		7.85344	4.47862		7.85344	4.47862		7.85344	4.47862		7.85344	4.47862		7.85344	4.47862		7.85344	4.47862		7.85344	4.47862		7.85344	4.47862		7.85344	4.47862
43		7.84166	4.46964		7.84166	4.46964		7.84166	4.46964		7.84166	4.46964		7.84166	4.46964		7.84166	4.46964		7.84804	4.47375		7.84804	4.47375		7.84804	4.47375		7.84804	4.47375		7.84804	4.47375		7.84804	4.47375		7.84804	4.47375		7.84804	4.47375		7.84804	4.47375		7.84804	4.47375
44		7.83252	4.46236		7.83252	4.46236		7.83252	4.46236		7.83252	4.46236		7.83252	4.46236		7.83252	4.46236		7.84263	4.46888		7.84263	4.46888		7.84263	4.46888		7.84263	4.46888		7.84263	4.46888		7.84263	4.46888		7.84263	4.46888		7.84263	4.46888		7.84263	4.46888		7.84263	4.46888
45		7.82275	4.45468		7.82275	4.45468		7.82275	4.45468		7.82275	4.45468		7.82275	4.45468		7.82275	4.45468		7.83787	4.46444		7.83787	4.46444		7.83787	4.46444		7.83787	4.46444		7.83787	4.46444		7.83787	4.46444		7.83787	4.46444		7.83787	4.46444		7.83787	4.46444		7.83787	4.46444
46		7.81124	4.44589		7.81124	4.44589		7.81124	4.44589		7.81124	4.44589		7.81124	4.44589		7.81124	4.44589		7.83158	4.45902		7.83158	4.45902		7.83158	4.45902		7.83158	4.45902		7.83158	4.45902		7.83158	4.45902		7.8331	4.46		7.8331	4.46		7.8331	4.46		7.8331	4.46
47		7.79806	4.43604		7.79806	4.43604		7.79806	4.43604		7.79806	4.43604		7.79806	4.43604		7.79806	4.43604		7.82543	4.45369		7.82543	4.45369		7.82543	4.45369		7.82543	4.45369		7.82543	4.45369		7.82543	4.45369		7.82899	4.45599		7.82899	4.45599		7.82899	4.45599		7.82899	4.45599
48		7.78176	4.42417		7.78176	4.42417		7.78176	4.42417		7.78176	4.42417		7.78176	4.42417		7.78176	4.42417		7.81857	4.44791		7.81857	4.44791		7.81857	4.44791		7.81857	4.44791		7.81857	4.44791		7.81857	4.44791		7.82488	4.45198		7.82488	4.45198		7.82488	4.45198		7.82488	4.45198
49		7.76128	4.4096		7.76128	4.4096		7.76128	4.4096		7.76128	4.4096		7.76128	4.4096		7.76128	4.4096		7.81075	4.44152		7.81075	4.44152		7.81075	4.44152		7.81075	4.44152		7.81075	4.44152		7.81075	4.44152		7.82075	4.44797		7.82075	4.44797		7.82075	4.44797		7.82075	4.44797
50		7.7352	4.39142		7.7352	4.39142		7.7352	4.39142		7.7352	4.39142		7.7352	4.39142		7.7352	4.39142		7.80166	4.43431		7.80166	4.43431		7.80166	4.43431		7.80166	4.43431		7.80166	4.43431		7.80166	4.43431		7.81663	4.44395		7.81663	4.44395		7.81663	4.44395		7.81663	4.44395
51		7.81753	4.44323		7.55673	4.18123		7.33093	3.95173		7.14013	3.75473		6.98433	3.59023		6.71113	3.25723		7.79151	4.42642		7.79151	4.42642		7.79151	4.42642		7.79151	4.42642		7.79151	4.42642		7.79151	4.42642		7.81165	4.4394		7.81165	4.4394		7.81165	4.4394		7.81165	4.4394
52		7.81404	4.43964		7.55324	4.17764		7.32744	3.94814		7.13664	3.75114		6.98084	3.58664		6.70764	3.25364		7.77904	4.41705		7.77904	4.41705		7.77904	4.41705		7.77904	4.41705		7.77904	4.41705		7.77904	4.41705		7.80615	4.43452		7.80615	4.43452		7.80615	4.43452		7.80615	4.43452
53		7.81056	4.43605		7.54976	4.17405		7.32396	3.94455		7.13316	3.74755		6.97736	3.58305		6.70416	3.25005		7.76348	4.40568		7.76348	4.40568		7.76348	4.40568		7.76348	4.40568		7.76348	4.40568		7.76348	4.40568		7.79995	4.42918		7.79995	4.42918		7.79995	4.42918		7.79995	4.42918
54		7.80707	4.43247		7.54627	4.17047		7.32047	3.94097		7.12967	3.74397		6.97387	3.57947		6.70067	3.24647		7.74377	4.39164		7.74377	4.39164		7.74377	4.39164		7.74377	4.39164		7.74377	4.39164		7.74377	4.39164		7.79281	4.42324		7.79281	4.42324		7.79281	4.42324		7.79281	4.42324
55		7.80423	4.42931		7.54343	4.16731		7.31763	3.93781		7.12683	3.74081		6.97103	3.57631		6.69783	3.24331		7.71913	4.37442		7.71913	4.37442		7.71913	4.37442		7.71913	4.37442		7.71913	4.37442		7.71913	4.37442		7.78505	4.41692		7.78505	4.41692		7.78505	4.41692		7.78505	4.41692
56		7.8014	4.42616		7.5406	4.16416		7.3148	3.93466		7.124	3.73766		6.9682	3.57316		6.695	3.24016		7.8014	4.42616		7.5406	4.16416		7.3148	3.93466		7.124	3.73766		6.9682	3.57316		6.695	3.24016		7.77559	4.4095		7.77559	4.4095		7.77559	4.4095		7.77559	4.4095
57		7.79922	4.42344		7.53842	4.16144		7.31262	3.93194		7.12182	3.73494		6.96602	3.57044		6.69282	3.23744		7.79922	4.42344		7.53842	4.16144		7.31262	3.93194		7.12182	3.73494		6.96602	3.57044		6.69282	3.23744		7.76448	4.40104		7.76448	4.40104		7.76448	4.40104		7.76448	4.40104
58		7.79638	4.42029		7.53558	4.15829		7.30978	3.92879		7.11898	3.73179		6.96318	3.56729		6.68998	3.23429		7.79638	4.42029		7.53558	4.15829		7.30978	3.92879		7.11898	3.73179		6.96318	3.56729		6.68998	3.23429		7.74964	4.39016		7.74964	4.39016		7.74964	4.39016		7.74964	4.39016
59		7.7942	4.41757		7.5334	4.15557		7.3076	3.92607		7.1168	3.72907		6.961	3.56457		6.6878	3.23157		7.7942	4.41757		7.5334	4.15557		7.3076	3.92607		7.1168	3.72907		6.961	3.56457		6.6878	3.23157		7.73131	4.37705		7.73131	4.37705		7.73131	4.37705		7.73131	4.37705
60		7.79201	4.41486		7.53121	4.15286		7.30541	3.92336		7.11461	3.72636		6.95881	3.56186		6.68561	3.22886		7.79201	4.41486		7.53121	4.15286		7.30541	3.92336		7.11461	3.72636		6.95881	3.56186		6.68561	3.22886		7.70743	4.36035		7.70743	4.36035		7.70743	4.36035		7.70743	4.36035
61		7.79048	4.41257		7.52968	4.15057		7.30388	3.92107		7.11308	3.72407		6.95728	3.55957		6.68408	3.22657		7.79048	4.41257		7.52968	4.15057		7.30388	3.92107		7.11308	3.72407		6.95728	3.55957		6.68408	3.22657		7.79048	4.41257		7.52968	4.15057		7.30388	3.92107		7.11308	3.72407
62		7.78829	4.40986		7.52749	4.14786		7.30169	3.91836		7.11089	3.72136		6.95509	3.55686		6.68189	3.22386		7.78829	4.40986		7.52749	4.14786		7.30169	3.91836		7.11089	3.72136		6.95509	3.55686		6.68189	3.22386		7.78829	4.40986		7.52749	4.14786		7.30169	3.91836		7.11089	3.72136
63		7.78676	4.40757		7.52596	4.14557		7.30016	3.91607		7.10936	3.71907		6.95356	3.55457		6.68036	3.22157		7.78676	4.40757		7.52596	4.14557		7.30016	3.91607		7.10936	3.71907		6.95356	3.55457		6.68036	3.22157		7.78676	4.40757		7.52596	4.14557		7.30016	3.91607		7.10936	3.71907
64		7.78522	4.40529		7.52442	4.14329		7.29862	3.91379		7.10782	3.71679		6.95202	3.55229		6.67882	3.21929		7.78522	4.40529		7.52442	4.14329		7.29862	3.91379		7.10782	3.71679		6.95202	3.55229		6.67882	3.21929		7.78522	4.40529		7.52442	4.14329		7.29862	3.91379		7.10782	3.71679
65		7.78435	4.40344		7.52355	4.14144		7.29775	3.91194		7.10695	3.71494		6.95115	3.55044		6.67795	3.21744		7.78435	4.40344		7.52355	4.14144		7.29775	3.91194		7.10695	3.71494		6.95115	3.55044		6.67795	3.21744		7.78435	4.40344		7.52355	4.14144		7.29775	3.91194		7.10695	3.71494
66		7.7828	4.40116		7.522	4.13916		7.2962	3.90966		7.1054	3.71266		6.9496	3.54816		6.6764	3.21516		7.7828	4.40116		7.522	4.13916		7.2962	3.90966		7.1054	3.71266		6.9496	3.54816		6.6764	3.21516		7.7828	4.40116		7.522	4.13916		7.2962	3.90966		7.1054	3.71266
67		7.78192	4.39931		7.52112	4.13731		7.29532	3.90781		7.10452	3.71081		6.94872	3.54631		6.67552	3.21331		7.78192	4.39931		7.52112	4.13731		7.29532	3.90781		7.10452	3.71081		6.94872	3.54631		6.67552	3.21331		7.78192	4.39931		7.52112	4.13731		7.29532	3.90781		7.10452	3.71081
68		7.78103	4.39746		7.52023	4.13546		7.29443	3.90596		7.10363	3.70896		6.94783	3.54446		6.67463	3.21146		7.78103	4.39746		7.52023	4.13546		7.29443	3.90596		7.10363	3.70896		6.94783	3.54446		6.67463	3.21146		7.78103	4.39746		7.52023	4.13546		7.29443	3.90596		7.10363	3.70896
69		7.7808	4.39605		7.52	4.13405		7.2942	3.90455		7.1034	3.70755		6.9476	3.54305		6.6744	3.21005		7.7808	4.39605		7.52	4.13405		7.2942	3.90455		7.1034	3.70755		6.9476	3.54305		6.6744	3.21005		7.7808	4.39605		7.52	4.13405		7.2942	3.90455		7.1034	3.70755
70		7.77991	4.3942		7.51911	4.1322		7.29331	3.9027		7.10251	3.7057		6.94671	3.5412		6.67351	3.2082		7.77991	4.3942		7.51911	4.1322		7.29331	3.9027		7.10251	3.7057		6.94671	3.5412		6.67351	3.2082		7.77991	4.3942		7.51911	4.1322		7.29331	3.9027		7.10251	3.7057
71		7.77968	4.39279		7.51888	4.13079		7.29308	3.90129		7.10228	3.70429		6.94648	3.53979		6.67328	3.20679		7.77968	4.39279		7.51888	4.13079		7.29308	3.90129		7.10228	3.70429		6.94648	3.53979		6.67328	3.20679		7.77968	4.39279		7.51888	4.13079		7.29308	3.90129		7.10228	3.70429
72		7.77944	4.39137		7.51864	4.12937		7.29284	3.89987		7.10204	3.70287		6.94624	3.53837		6.67304	3.20537		7.77944	4.39137		7.51864	4.12937		7.29284	3.89987		7.10204	3.70287		6.94624	3.53837		6.67304	3.20537		7.77944	4.39137		7.51864	4.12937		7.29284	3.89987		7.10204	3.70287
73		7.77919	4.38996		7.51839	4.12796		7.29259	3.89846		7.10179	3.70146		6.94599	3.53696		6.67279	3.20396		7.77919	4.38996		7.51839	4.12796		7.29259	3.89846		7.10179	3.70146		6.94599	3.53696		6.67279	3.20396		7.77919	4.38996		7.51839	4.12796		7.29259	3.89846		7.10179	3.70146
74		7.77961	4.38898		7.51881	4.12698		7.29301	3.89748		7.10221	3.70048		6.94641	3.53598		6.67321	3.20298		7.77961	4.38898		7.51881	4.12698		7.29301	3.89748		7.10221	3.70048		6.94641	3.53598		6.67321	3.20298		7.77961	4.38898		7.51881	4.12698		7.29301	3.89748		7.10221	3.70048
75		7.77936	4.38757		7.51856	4.12557		7.29276	3.89607		7.10196	3.69907		6.94616	3.53457		6.67296	3.20157		7.77936	4.38757		7.51856	4.12557		7.29276	3.89607		7.10196	3.69907		6.94616	3.53457		6.67296	3.20157		7.77936	4.38757		7.51856	4.12557		7.29276	3.89607		7.10196	3.69907
76		7.77976	4.38658		7.51896	4.12458		7.29316	3.89508		7.10236	3.69808		6.94656	3.53358		6.67336	3.20058		7.77976	4.38658		7.51896	4.12458		7.29316	3.89508		7.10236	3.69808		6.94656	3.53358		6.67336	3.20058		7.77976	4.38658		7.51896	4.12458		7.29316	3.89508		7.10236	3.69808
77		7.78017	4.3856		7.51937	4.1236		7.29357	3.8941		7.10277	3.6971		6.94697	3.5326		6.67377	3.1996		7.78017	4.3856		7.51937	4.1236		7.29357	3.8941		7.10277	3.6971		6.94697	3.5326		6.67377	3.1996		7.78017	4.3856		7.51937	4.1236		7.29357	3.8941		7.10277	3.6971
78		7.78122	4.38505		7.52042	4.12305		7.29462	3.89355		7.10382	3.69655		6.94802	3.53205		6.67482	3.19905		7.78122	4.38505		7.52042	4.12305		7.29462	3.89355		7.10382	3.69655		6.94802	3.53205		6.67482	3.19905		7.78122	4.38505		7.52042	4.12305		7.29462	3.89355		7.10382	3.69655
79		7.78162	4.38407		7.52082	4.12207		7.29502	3.89257		7.10422	3.69557		6.94842	3.53107		6.67522	3.19807		7.78162	4.38407		7.52082	4.12207		7.29502	3.89257		7.10422	3.69557		6.94842	3.53107		6.67522	3.19807		7.78162	4.38407		7.52082	4.12207		7.29502	3.89257		7.10422	3.69557
80		7.78267	4.38352		7.52187	4.12152		7.29607	3.89202		7.10527	3.69502		6.94947	3.53052		6.67627	3.19752		7.78267	4.38352		7.52187	4.12152		7.29607	3.89202		7.10527	3.69502		6.94947	3.53052		6.67627	3.19752		7.78267	4.38352		7.52187	4.12152		7.29607	3.89202		7.10527	3.69502
81		7.79993	4.38924		7.53913	4.12724		7.31333	3.89774		7.12253	3.70074		6.96673	3.53624		6.69353	3.20324		7.79993	4.38924		7.53913	4.12724		7.31333	3.89774		7.12253	3.70074		6.96673	3.53624		6.69353	3.20324		7.79993	4.38924		7.53913	4.12724		7.31333	3.89774		7.12253	3.70074
82		7.80099	4.38871		7.54019	4.12671		7.31439	3.89721		7.12359	3.70021		6.96779	3.53571		6.69459	3.20271		7.80099	4.38871		7.54019	4.12671		7.31439	3.89721		7.12359	3.70021		6.96779	3.53571		6.69459	3.20271		7.80099	4.38871		7.54019	4.12671		7.31439	3.89721		7.12359	3.70021
83		7.80205	4.38817		7.54125	4.12617		7.31545	3.89667		7.12465	3.69967		6.96885	3.53517		6.69565	3.20217		7.80205	4.38817		7.54125	4.12617		7.31545	3.89667		7.12465	3.69967		6.96885	3.53517		6.69565	3.20217		7.80205	4.38817		7.54125	4.12617		7.31545	3.89667		7.12465	3.69967
84		7.8031	4.38764		7.5423	4.12564		7.3165	3.89614		7.1257	3.69914		6.9699	3.53464		6.6967	3.20164		7.8031	4.38764		7.5423	4.12564		7.3165	3.89614		7.1257	3.69914		6.9699	3.53464		6.6967	3.20164		7.8031	4.38764		7.5423	4.12564		7.3165	3.89614		7.1257	3.69914
85		7.8048	4.38753		7.544	4.12553		7.3182	3.89603		7.1274	3.69903		6.9716	3.53453		6.6984	3.20153		7.8048	4.38753		7.544	4.12553		7.3182	3.89603		7.1274	3.69903		6.9716	3.53453		6.6984	3.20153		7.8048	4.38753		7.544	4.12553		7.3182	3.89603		7.1274	3.69903
86		7.80649	4.38742		7.54569	4.12542		7.31989	3.89592		7.12909	3.69892		6.97329	3.53442		6.70009	3.20142		7.80649	4.38742		7.54569	4.12542		7.31989	3.89592		7.12909	3.69892		6.97329	3.53442		6.70009	3.20142		7.80649	4.38742		7.54569	4.12542		7.31989	3.89592		7.12909	3.69892
87		7.80818	4.38731		7.54738	4.12531		7.32158	3.89581		7.13078	3.69881		6.97498	3.53431		6.70178	3.20131		7.80818	4.38731		7.54738	4.12531		7.32158	3.89581		7.13078	3.69881		6.97498	3.53431		6.70178	3.20131		7.80818	4.38731		7.54738	4.12531		7.32158	3.89581		7.13078	3.69881
88		7.80987	4.3872		7.54907	4.1252		7.32327	3.8957		7.13247	3.6987		6.97667	3.5342		6.70347	3.2012		7.80987	4.3872		7.54907	4.1252		7.32327	3.8957		7.13247	3.6987		6.97667	3.5342		6.70347	3.2012		7.80987	4.3872		7.54907	4.1252		7.32327	3.8957		7.13247	3.6987
89		7.81155	4.38709		7.55075	4.12509		7.32495	3.89559		7.13415	3.69859		6.97835	3.53409		6.70515	3.20109		7.81155	4.38709		7.55075	4.12509		7.32495	3.89559		7.13415	3.69859		6.97835	3.53409		6.70515	3.20109		7.81155	4.38709		7.55075	4.12509		7.32495	3.89559		7.13415	3.69859
90		7.81322	4.38698		7.55242	4.12498		7.32662	3.89548		7.13582	3.69848		6.98002	3.53398		6.70682	3.20098		7.81322	4.38698		7.55242	4.12498		7.32662	3.89548		7.13582	3.69848		6.98002	3.53398		6.70682	3.20098		7.81322	4.38698		7.55242	4.12498		7.32662	3.89548		7.13582	3.69848
91		7.81554	4.3873		7.55474	4.1253		7.32894	3.8958		7.13814	3.6988		6.98234	3.5343		6.70914	3.2013		7.81554	4.3873		7.55474	4.1253		7.32894	3.8958		7.13814	3.6988		6.98234	3.5343		6.70914	3.2013		7.81554	4.3873		7.55474	4.1253		7.32894	3.8958		7.13814	3.6988
92		7.81721	4.38718		7.55641	4.12518		7.33061	3.89568		7.13981	3.69868		6.98401	3.53418		6.71081	3.20118		7.81721	4.38718		7.55641	4.12518		7.33061	3.89568		7.13981	3.69868		6.98401	3.53418		6.71081	3.20118		7.81721	4.38718		7.55641	4.12518		7.33061	3.89568		7.13981	3.69868
93		7.81952	4.3875		7.55872	4.1255		7.33292	3.896		7.14212	3.699		6.98632	3.5345		6.71312	3.2015		7.81952	4.3875		7.55872	4.1255		7.33292	3.896		7.14212	3.699		6.98632	3.5345		6.71312	3.2015		7.81952	4.3875		7.55872	4.1255		7.33292	3.896		7.14212	3.699
94		7.82182	4.38781		7.56102	4.12581		7.33522	3.89631		7.14442	3.69931		6.98862	3.53481		6.71542	3.20181		7.82182	4.38781		7.56102	4.12581		7.33522	3.89631		7.14442	3.69931		6.98862	3.53481		6.71542	3.20181		7.82182	4.38781		7.56102	4.12581		7.33522	3.89631		7.14442	3.69931
95		7.82412	4.38812		7.56332	4.12612		7.33752	3.89662		7.14672	3.69962		6.99092	3.53512		6.71772	3.20212		7.82412	4.38812		7.56332	4.12612		7.33752	3.89662		7.14672	3.69962		6.99092	3.53512		6.71772	3.20212		7.82412	4.38812		7.56332	4.12612		7.33752	3.89662		7.14672	3.69962
96		7.82706	4.38885		7.56626	4.12685		7.34046	3.89735		7.14966	3.70035		6.99386	3.53585		6.72066	3.20285		7.82706	4.38885		7.56626	4.12685		7.34046	3.89735		7.14966	3.70035		6.99386	3.53585		6.72066	3.20285		7.82706	4.38885		7.56626	4.12685		7.34046	3.89735		7.14966	3.70035
97		7.82935	4.38916		7.56855	4.12716		7.34275	3.89766		7.15195	3.70066		6.99615	3.53616		6.72295	3.20316		7.82935	4.38916		7.56855	4.12716		7.34275	3.89766		7.15195	3.70066		6.99615	3.53616		6.72295	3.20316		7.82935	4.38916		7.56855	4.12716		7.34275	3.89766		7.15195	3.70066
98		7.83228	4.38989		7.57148	4.12789		7.34568	3.89839		7.15488	3.70139		6.99908	3.53689		6.72588	3.20389		7.83228	4.38989		7.57148	4.12789		7.34568	3.89839		7.15488	3.70139		6.99908	3.53689		6.72588	3.20389		7.83228	4.38989		7.57148	4.12789		7.34568	3.89839		7.15488	3.70139
99		7.83456	4.3902		7.57376	4.1282		7.34796	3.8987		7.15716	3.7017		7.00136	3.5372		6.72816	3.2042		7.83456	4.3902		7.57376	4.1282		7.34796	3.8987		7.15716	3.7017		7.00136	3.5372		6.72816	3.2042		7.83456	4.3902		7.57376	4.1282		7.34796	3.8987		7.15716	3.7017
100		7.83748	4.39093		7.57668	4.12893		7.35088	3.89943		7.16008	3.70243		7.00428	3.53793		6.73108	3.20493		7.83748	4.39093		7.57668	4.12893		7.35088	3.89943		7.16008	3.70243		7.00428	3.53793		6.73108	3.20493		7.83748	4.39093		7.57668	4.12893		7.35088	3.89943		7.16008	3.70243
101		7.84039	4.39166		7.57959	4.12966		7.35379	3.90016		7.16299	3.70316		7.00719	3.53866		6.73399	3.20566		7.84039	4.39166		7.57959	4.12966		7.35379	3.90016		7.16299	3.70316		7.00719	3.53866		6.73399	3.20566		7.84039	4.39166		7.57959	4.12966		7.35379	3.90016		7.16299	3.70316
102		7.8433	4.39238		7.5825	4.13038		7.3567	3.90088		7.1659	3.70388		7.0101	3.53938		6.7369	3.20638		7.8433	4.39238		7.5825	4.13038		7.3567	3.90088		7.1659	3.70388		7.0101	3.53938		6.7369	3.20638		7.8433	4.39238		7.5825	4.13038		7.3567	3.90088		7.1659	3.70388
103		7.8462	4.39311		7.5854	4.13111		7.3596	3.90161		7.1688	3.70461		7.013	3.54011		6.7398	3.20711		7.8462	4.39311		7.5854	4.13111		7.3596	3.90161		7.1688	3.70461		7.013	3.54011		6.7398	3.20711		7.8462	4.39311		7.5854	4.13111		7.3596	3.90161		7.1688	3.70461
104		7.84909	4.39383		7.58829	4.13183		7.36249	3.90233		7.17169	3.70533		7.01589	3.54083		6.74269	3.20783		7.84909	4.39383		7.58829	4.13183		7.36249	3.90233		7.17169	3.70533		7.01589	3.54083		6.74269	3.20783		7.84909	4.39383		7.58829	4.13183		7.36249	3.90233		7.17169	3.70533
105		7.85198	4.39455		7.59118	4.13255		7.36538	3.90305		7.17458	3.70605		7.01878	3.54155		6.74558	3.20855		7.85198	4.39455		7.59118	4.13255		7.36538	3.90305		7.17458	3.70605		7.01878	3.54155		6.74558	3.20855		7.85198	4.39455		7.59118	4.13255		7.36538	3.90305		7.17458	3.70605
106		7.85551	4.3957		7.59471	4.1337		7.36891	3.9042		7.17811	3.7072		7.02231	3.5427		6.74911	3.2097		7.85551	4.3957		7.59471	4.1337		7.36891	3.9042		7.17811	3.7072		7.02231	3.5427		6.74911	3.2097		7.85551	4.3957		7.59471	4.1337		7.36891	3.9042		7.17811	3.7072
107		7.85839	4.39642		7.59759	4.13442		7.37179	3.90492		7.18099	3.70792		7.02519	3.54342		6.75199	3.21042		7.85839	4.39642		7.59759	4.13442		7.37179	3.90492		7.18099	3.70792		7.02519	3.54342		6.75199	3.21042		7.85839	4.39642		7.59759	4.13442		7.37179	3.90492		7.18099	3.70792
108		7.86191	4.39756		7.60111	4.13556		7.37531	3.90606		7.18451	3.70906		7.02871	3.54456		6.75551	3.21156		7.86191	4.39756		7.60111	4.13556		7.37531	3.90606		7.18451	3.70906		7.02871	3.54456		6.75551	3.21156		7.86191	4.39756		7.60111	4.13556		7.37531	3.90606		7.18451	3.70906
109		7.86478	4.39828		7.60398	4.13628		7.37818	3.90678		7.18738	3.70978		7.03158	3.54528		6.75838	3.21228		7.86478	4.39828		7.60398	4.13628		7.37818	3.90678		7.18738	3.70978		7.03158	3.54528		6.75838	3.21228		7.86478	4.39828		7.60398	4.13628		7.37818	3.90678		7.18738	3.70978
110		7.86828	4.39942		7.60748	4.13742		7.38168	3.90792		7.19088	3.71092		7.03508	3.54642		6.76188	3.21342		7.86828	4.39942		7.60748	4.13742		7.38168	3.90792		7.19088	3.71092		7.03508	3.54642		6.76188	3.21342		7.86828	4.39942		7.60748	4.13742		7.38168	3.90792		7.19088	3.71092
111		7.87178	4.40056		7.61098	4.13856		7.38518	3.90906		7.19438	3.71206		7.03858	3.54756		6.76538	3.21456		7.87178	4.40056		7.61098	4.13856		7.38518	3.90906		7.19438	3.71206		7.03858	3.54756		6.76538	3.21456		7.87178	4.40056		7.61098	4.13856		7.38518	3.90906		7.19438	3.71206
112		7.87528	4.4017		7.61448	4.1397		7.38868	3.9102		7.19788	3.7132		7.04208	3.5487		6.76888	3.2157		7.87528	4.4017		7.61448	4.1397		7.38868	3.9102		7.19788	3.7132		7.04208	3.5487		6.76888	3.2157		7.87528	4.4017		7.61448	4.1397		7.38868	3.9102		7.19788	3.7132
113		7.87876	4.40283		7.61796	4.14083		7.39216	3.91133		7.20136	3.71433		7.04556	3.54983		6.77236	3.21683		7.87876	4.40283		7.61796	4.14083		7.39216	3.91133		7.20136	3.71433		7.04556	3.54983		6.77236	3.21683		7.87876	4.40283		7.61796	4.14083		7.39216	3.91133		7.20136	3.71433
114		7.88225	4.40396		7.62145	4.14196		7.39565	3.91246		7.20485	3.71546		7.04905	3.55096		6.77585	3.21796		7.88225	4.40396		7.62145	4.14196		7.39565	3.91246		7.20485	3.71546		7.04905	3.55096		6.77585	3.21796		7.88225	4.40396		7.62145	4.14196		7.39565	3.91246		7.20485	3.71546
115		7.88572	4.4051		7.62492	4.1431		7.39912	3.9136		7.20832	3.7166		7.05252	3.5521		6.77932	3.2191		7.88572	4.4051		7.62492	4.1431		7.39912	3.9136		7.20832	3.7166		7.05252	3.5521		6.77932	3.2191		7.88572	4.4051		7.62492	4.1431		7.39912	3.9136		7.20832	3.7166
116		7.88919	4.40623		7.62839	4.14423		7.40259	3.91473		7.21179	3.71773		7.05599	3.55323		6.78279	3.22023		7.88919	4.40623		7.62839	4.14423		7.40259	3.91473		7.21179	3.71773		7.05599	3.55323		6.78279	3.22023		7.88919	4.40623		7.62839	4.14423		7.40259	3.91473		7.21179	3.71773
117		7.89266	4.40736		7.63186	4.14536		7.40606	3.91586		7.21526	3.71886		7.05946	3.55436		6.78626	3.22136		7.89266	4.40736		7.63186	4.14536		7.40606	3.91586		7.21526	3.71886		7.05946	3.55436		6.78626	3.22136		7.89266	4.40736		7.63186	4.14536		7.40606	3.91586		7.21526	3.71886
118		7.89612	4.40848		7.63532	4.14648		7.40952	3.91698		7.21872	3.71998		7.06292	3.55548		6.78972	3.22248		7.89612	4.40848		7.63532	4.14648		7.40952	3.91698		7.21872	3.71998		7.06292	3.55548		6.78972	3.22248		7.89612	4.40848		7.63532	4.14648		7.40952	3.91698		7.21872	3.71998
119		7.90021	4.41003		7.63941	4.14803		7.41361	3.91853		7.22281	3.72153		7.06701	3.55703		6.79381	3.22403		7.90021	4.41003		7.63941	4.14803		7.41361	3.91853		7.22281	3.72153		7.06701	3.55703		6.79381	3.22403		7.90021	4.41003		7.63941	4.14803		7.41361	3.91853		7.22281	3.72153
120		7.90366	4.41116		7.64286	4.14916		7.41706	3.91966		7.22626	3.72266		7.07046	3.55816		6.79726	3.22516		7.90366	4.41116		7.64286	4.14916		7.41706	3.91966		7.22626	3.72266		7.07046	3.55816		6.79726	3.22516		7.90366	4.41116		7.64286	4.14916		7.41706	3.91966		7.22626	3.72266
MPLH		no melt			melt 0.5%			melt 1%			melt 1.5%			melt 2%			melt 4%			no melt			melt 0.5%			melt 1%			melt 1.5%			melt 2%			melt 4%			no melt			melt 0.5%			melt 1%			melt 1.5%
Depth		Vp	Vs		Vp	Vs		Vp	Vs		Vp	Vs		Vp	Vs		Vp	Vs		Vp	Vs		Vp	Vs		Vp	Vs		Vp	Vs		Vp	Vs		Vp	Vs		Vp	Vs		Vp	Vs		Vp	Vs		Vp	Vs
1		3.2825	1.955		3.2825	1.955		3.2825	1.955		3.2825	1.955		3.2825	1.955		3.2825	1.955		3.2825	1.955		3.2825	1.955		3.2825	1.955		3.2825	1.955		3.2825	1.955		3.2825	1.955		3.2825	1.955		3.2825	1.955		3.2825	1.955		3.2825	1.955
2		4.18841	2.50485		4.18841	2.50485		4.18841	2.50485		4.18841	2.50485		4.18841	2.50485		4.18841	2.50485		4.18841	2.50485		4.18841	2.50485		4.18841	2.50485		4.18841	2.50485		4.18841	2.50485		4.18841	2.50485		4.18841	2.50485		4.18841	2.50485		4.18841	2.50485		4.18841	2.50485
3		5.09432	3.05471		5.09432	3.05471		5.09432	3.05471		5.09432	3.05471		5.09432	3.05471		5.09432	3.05471		5.09432	3.05471		5.09432	3.05471		5.09432	3.05471		5.09432	3.05471		5.09432	3.05471		5.09432	3.05471		5.09432	3.05471		5.09432	3.05471		5.09432	3.05471		5.09432	3.05471
4		6.00023	3.60456		6.00023	3.60456		6.00023	3.60456		6.00023	3.60456		6.00023	3.60456		6.00023	3.60456		6.00023	3.60456		6.00023	3.60456		6.00023	3.60456		6.00023	3.60456		6.00023	3.60456		6.00023	3.60456		6.00023	3.60456		6.00023	3.60456		6.00023	3.60456		6.00023	3.60456
5		6.0133	3.60919		6.0133	3.60919		6.0133	3.60919		6.0133	3.60919		6.0133	3.60919		6.0133	3.60919		6.0133	3.60919		6.0133	3.60919		6.0133	3.60919		6.0133	3.60919		6.0133	3.60919		6.0133	3.60919		6.0133	3.60919		6.0133	3.60919		6.0133	3.60919		6.0133	3.60919
6		6.02637	3.61381		6.02637	3.61381		6.02637	3.61381		6.02637	3.61381		6.02637	3.61381		6.02637	3.61381		6.02637	3.61381		6.02637	3.61381		6.02637	3.61381		6.02637	3.61381		6.02637	3.61381		6.02637	3.61381		6.02637	3.61381		6.02637	3.61381		6.02637	3.61381		6.02637	3.61381
7		6.03944	3.61844		6.03944	3.61844		6.03944	3.61844		6.03944	3.61844		6.03944	3.61844		6.03944	3.61844		6.03944	3.61844		6.03944	3.61844		6.03944	3.61844		6.03944	3.61844		6.03944	3.61844		6.03944	3.61844		6.03944	3.61844		6.03944	3.61844		6.03944	3.61844		6.03944	3.61844
8		6.06604	3.62784		6.06604	3.62784		6.06604	3.62784		6.06604	3.62784		6.06604	3.62784		6.06604	3.62784		6.06604	3.62784		6.06604	3.62784		6.06604	3.62784		6.06604	3.62784		6.06604	3.62784		6.06604	3.62784		6.06604	3.62784		6.06604	3.62784		6.06604	3.62784		6.06604	3.62784
9		6.09263	3.63723		6.09263	3.63723		6.09263	3.63723		6.09263	3.63723		6.09263	3.63723		6.09263	3.63723		6.09263	3.63723		6.09263	3.63723		6.09263	3.63723		6.09263	3.63723		6.09263	3.63723		6.09263	3.63723		6.09263	3.63723		6.09263	3.63723		6.09263	3.63723		6.09263	3.63723
10		6.11923	3.64663		6.11923	3.64663		6.11923	3.64663		6.11923	3.64663		6.11923	3.64663		6.11923	3.64663		6.11923	3.64663		6.11923	3.64663		6.11923	3.64663		6.11923	3.64663		6.11923	3.64663		6.11923	3.64663		6.11923	3.64663		6.11923	3.64663		6.11923	3.64663		6.11923	3.64663
11		6.16158	3.65856		6.16158	3.65856		6.16158	3.65856		6.16158	3.65856		6.16158	3.65856		6.16158	3.65856		6.16158	3.65856		6.16158	3.65856		6.16158	3.65856		6.16158	3.65856		6.16158	3.65856		6.16158	3.65856		6.16158	3.65856		6.16158	3.65856		6.16158	3.65856		6.16158	3.65856
12		6.20392	3.67049		6.20392	3.67049		6.20392	3.67049		6.20392	3.67049		6.20392	3.67049		6.20392	3.67049		6.20392	3.67049		6.20392	3.67049		6.20392	3.67049		6.20392	3.67049		6.20392	3.67049		6.20392	3.67049		6.20392	3.67049		6.20392	3.67049		6.20392	3.67049		6.20392	3.67049
13		6.24627	3.68242		6.24627	3.68242		6.24627	3.68242		6.24627	3.68242		6.24627	3.68242		6.24627	3.68242		6.24627	3.68242		6.24627	3.68242		6.24627	3.68242		6.24627	3.68242		6.24627	3.68242		6.24627	3.68242		6.24627	3.68242		6.24627	3.68242		6.24627	3.68242		6.24627	3.68242
14		6.28862	3.69435		6.28862	3.69435		6.28862	3.69435		6.28862	3.69435		6.28862	3.69435		6.28862	3.69435		6.28862	3.69435		6.28862	3.69435		6.28862	3.69435		6.28862	3.69435		6.28862	3.69435		6.28862	3.69435		6.28862	3.69435		6.28862	3.69435		6.28862	3.69435		6.28862	3.69435
15		6.33096	3.70628		6.33096	3.70628		6.33096	3.70628		6.33096	3.70628		6.33096	3.70628		6.33096	3.70628		6.33096	3.70628		6.33096	3.70628		6.33096	3.70628		6.33096	3.70628		6.33096	3.70628		6.33096	3.70628		6.33096	3.70628		6.33096	3.70628		6.33096	3.70628		6.33096	3.70628
16		6.37331	3.71821		6.37331	3.71821		6.37331	3.71821		6.37331	3.71821		6.37331	3.71821		6.37331	3.71821		6.37331	3.71821		6.37331	3.71821		6.37331	3.71821		6.37331	3.71821		6.37331	3.71821		6.37331	3.71821		6.37331	3.71821		6.37331	3.71821		6.37331	3.71821		6.37331	3.71821
17		6.45522	3.7408		6.45522	3.7408		6.45522	3.7408		6.45522	3.7408		6.45522	3.7408		6.45522	3.7408		6.45522	3.7408		6.45522	3.7408		6.45522	3.7408		6.45522	3.7408		6.45522	3.7408		6.45522	3.7408		6.45522	3.7408		6.45522	3.7408		6.45522	3.7408		6.45522	3.7408
18		6.53713	3.7634		6.53713	3.7634		6.53713	3.7634		6.53713	3.7634		6.53713	3.7634		6.53713	3.7634		6.53713	3.7634		6.53713	3.7634		6.53713	3.7634		6.53713	3.7634		6.53713	3.7634		6.53713	3.7634		6.53713	3.7634		6.53713	3.7634		6.53713	3.7634		6.53713	3.7634
19		6.61905	3.786		6.61905	3.786		6.61905	3.786		6.61905	3.786		6.61905	3.786		6.61905	3.786		6.61905	3.786		6.61905	3.786		6.61905	3.786		6.61905	3.786		6.61905	3.786		6.61905	3.786		6.61905	3.786		6.61905	3.786		6.61905	3.786		6.61905	3.786
20		6.70096	3.80859		6.70096	3.80859		6.70096	3.80859		6.70096	3.80859		6.70096	3.80859		6.70096	3.80859		6.70096	3.80859		6.70096	3.80859		6.70096	3.80859		6.70096	3.80859		6.70096	3.80859		6.70096	3.80859		6.70096	3.80859		6.70096	3.80859		6.70096	3.80859		6.70096	3.80859
21		6.78287	3.83119		6.78287	3.83119		6.78287	3.83119		6.78287	3.83119		6.78287	3.83119		6.78287	3.83119		6.78287	3.83119		6.78287	3.83119		6.78287	3.83119		6.78287	3.83119		6.78287	3.83119		6.78287	3.83119		6.78287	3.83119		6.78287	3.83119		6.78287	3.83119		6.78287	3.83119
22		6.87476	3.87494		6.87476	3.87494		6.87476	3.87494		6.87476	3.87494		6.87476	3.87494		6.87476	3.87494		6.87476	3.87494		6.87476	3.87494		6.87476	3.87494		6.87476	3.87494		6.87476	3.87494		6.87476	3.87494		6.87476	3.87494		6.87476	3.87494		6.87476	3.87494		6.87476	3.87494
23		6.96665	3.9187		6.96665	3.9187		6.96665	3.9187		6.96665	3.9187		6.96665	3.9187		6.96665	3.9187		6.96665	3.9187		6.96665	3.9187		6.96665	3.9187		6.96665	3.9187		6.96665	3.9187		6.96665	3.9187		6.96665	3.9187		6.96665	3.9187		6.96665	3.9187		6.96665	3.9187
24		7.05854	3.96245		7.05854	3.96245		7.05854	3.96245		7.05854	3.96245		7.05854	3.96245		7.05854	3.96245		7.05854	3.96245		7.05854	3.96245		7.05854	3.96245		7.05854	3.96245		7.05854	3.96245		7.05854	3.96245		7.05854	3.96245		7.05854	3.96245		7.05854	3.96245		7.05854	3.96245
25		7.15042	4.00621		7.15042	4.00621		7.15042	4.00621		7.15042	4.00621		7.15042	4.00621		7.15042	4.00621		7.15042	4.00621		7.15042	4.00621		7.15042	4.00621		7.15042	4.00621		7.15042	4.00621		7.15042	4.00621		7.15042	4.00621		7.15042	4.00621		7.15042	4.00621		7.15042	4.00621
26		7.24231	4.04997		7.24231	4.04997		7.24231	4.04997		7.24231	4.04997		7.24231	4.04997		7.24231	4.04997		7.24231	4.04997		7.24231	4.04997		7.24231	4.04997		7.24231	4.04997		7.24231	4.04997		7.24231	4.04997		7.24231	4.04997		7.24231	4.04997		7.24231	4.04997		7.24231	4.04997
27		7.3342	4.09372		7.3342	4.09372		7.3342	4.09372		7.3342	4.09372		7.3342	4.09372		7.3342	4.09372		7.3342	4.09372		7.3342	4.09372		7.3342	4.09372		7.3342	4.09372		7.3342	4.09372		7.3342	4.09372		7.3342	4.09372		7.3342	4.09372		7.3342	4.09372		7.3342	4.09372
28		7.41848	4.1442		7.41848	4.1442		7.41848	4.1442		7.41848	4.1442		7.41848	4.1442		7.41848	4.1442		7.41848	4.1442		7.41848	4.1442		7.41848	4.1442		7.41848	4.1442		7.41848	4.1442		7.41848	4.1442		7.41848	4.1442		7.41848	4.1442		7.41848	4.1442		7.41848	4.1442
29		7.50276	4.19467		7.50276	4.19467		7.50276	4.19467		7.50276	4.19467		7.50276	4.19467		7.50276	4.19467		7.50276	4.19467		7.50276	4.19467		7.50276	4.19467		7.50276	4.19467		7.50276	4.19467		7.50276	4.19467		7.50276	4.19467		7.50276	4.19467		7.50276	4.19467		7.50276	4.19467
30		7.58704	4.24514		7.58704	4.24514		7.58704	4.24514		7.58704	4.24514		7.58704	4.24514		7.58704	4.24514		7.58704	4.24514		7.58704	4.24514		7.58704	4.24514		7.58704	4.24514		7.58704	4.24514		7.58704	4.24514		7.58704	4.24514		7.58704	4.24514		7.58704	4.24514		7.58704	4.24514
[truncated: 459 more rows]
[truncated: 52 more columns]

## Sheet: Tab 4. AlpArray, PACASE
		A260A			A261A			A262A			A263A			A264A			A265A			A266A			A267A			A272A			A273A			HU01A			HU02A			HU03A			HU04A			HU05A			HU06A
[truncated: 122 more rows]
[truncated: 16 more columns]
